# Supplementary material for: The Distinct Properties of the Consecutive Disordered Regions Inside or Outside Protein Domains and Their Functional Significance
Source: Int J Mol Sci. 2021 Oct 1;22(19):10677. doi: 10.3390/ijms221910677 (PMC8508753; doi:10.3390/ijms221910677)
Supplement: Supplementary file 1 [file ijms-22-10677-s001.zip › Additional file 2.xlsx]

## Sheet: Table S1
Table S1 All the two types of CDRs in human proteins and their property data (uesd in figure 1 and figure 2)
ENSP-CDR_start-CDR_end	Type	Aliphatic index	Hydrophobic score	Instability index	Stickiness	PTM_num_per_30aa
ENSP00000492193-506-538	NonDomCDR	39.6875	-1.93437	82.6545	-0.208303	0
ENSP00000492193-289-415	NonDomCDR	44.0476	-1.68889	55.089	-0.187279	0
ENSP00000481783-677-706	NonDomCDR	54.1379	-1.15172	48.1133	-0.0993267	0
ENSP00000481783-4-50	NonDomCDR	38.0435	-0.806522	86.7404	0.103462	0
ENSP00000426627-257-300	NonDomCDR	43.2558	-1.2814	53.2159	-0.0499045	3.40909
ENSP00000486295-3897-3928	NonDomCDR	62.9032	-0.425806	41.0625	0.178591	0
ENSP00000486295-1912-1946	NonDomCDR	45.8824	-1.57647	26.1171	0.00682286	0
ENSP00000486295-2528-2565	NonDomCDR	51.6667	-1.325	75.2907	0.0068027	0
ENSP00000486295-2081-2120	NonDomCDR	22.5641	-1.67692	39.7525	0.14591	0
ENSP00000486295-2418-2457	NonDomCDR	30	-1.64872	34.545	0.119795	0
ENSP00000486295-2246-2288	NonDomCDR	30.2381	-1.78571	36.9279	0.128872	0
ENSP00000486295-3840-3882	NonDomCDR	46.6667	-0.366667	67.0093	0.180686	0
ENSP00000486295-2584-2632	NonDomCDR	61.0417	-0.616667	123.033	0.0832959	0
ENSP00000486295-2179-2228	NonDomCDR	45.9184	-1.53878	42.182	-0.002912	0
ENSP00000486295-3692-3768	NonDomCDR	47.3684	-0.448684	106.427	0.175136	0
ENSP00000486295-1197-1854	NonDomCDR	42.5266	-0.600304	48.417	0.108309	0
ENSP00000487059-2551-2583	NonDomCDR	24.375	-2.00937	45.8364	-0.0367788	0
ENSP00000487059-3753-3786	NonDomCDR	26.6667	-1.96364	29.9353	-0.0204294	0
ENSP00000487059-2381-2415	NonDomCDR	12.1875	-2.34687	41.0596	0.042803	0
ENSP00000487059-3815-3854	NonDomCDR	22.5641	-1.67692	39.7525	0.14591	0
ENSP00000487059-2777-2817	NonDomCDR	41.5	-1.6775	54.922	0.11972	0
ENSP00000487059-2887-2927	NonDomCDR	36.75	-1.895	43.3561	-0.120727	0
ENSP00000487059-3922-3962	NonDomCDR	36.75	-1.895	43.3561	-0.120727	0
ENSP00000487059-2440-2482	NonDomCDR	37.1429	-1.6	29.3372	0.129226	0
ENSP00000487059-2609-2651	NonDomCDR	20.9524	-1.75476	33.5116	0.128084	0
ENSP00000487059-3406-3448	NonDomCDR	32.619	-1.66429	35.1349	-0.00801628	0
ENSP00000487059-3474-3516	NonDomCDR	39.5238	-1.79286	25.986	0.0970628	0
ENSP00000487059-3575-3617	NonDomCDR	37.1429	-1.64286	27.1605	0.0193163	0
ENSP00000487059-4036-4078	NonDomCDR	37.1429	-1.6	29.3372	0.129226	0
ENSP00000487059-4137-4179	NonDomCDR	37.1429	-1.64286	27.1605	0.0193163	0
ENSP00000487059-3304-3347	NonDomCDR	29.5349	-1.78837	38.5864	0.133407	0
ENSP00000487059-3640-3685	NonDomCDR	17.7273	-1.75455	31.7309	0.125131	0
ENSP00000487059-4202-4247	NonDomCDR	28.8636	-1.68182	33.2352	0.103184	0
ENSP00000487059-2710-2759	NonDomCDR	45.9184	-1.53878	42.182	-0.002912	0
ENSP00000487059-2958-3262	NonDomCDR	39.2105	-0.634539	40.2	0.124681	0
ENSP00000451468-83-114	NonDomCDR	18.7097	-1.79355	57.4156	-0.243156	0
ENSP00000488303-95-169	NonDomCDR	30.5405	-1.52432	77.1587	-0.23068	0
ENSP00000374998-95-169	NonDomCDR	30.5405	-1.52432	77.1587	-0.23068	0
ENSP00000473163-109-150	DomCDR	50	-1.28049	76.8905	0.056081	0
ENSP00000485942-315-346	NonDomCDR	50.3226	-1.46129	33.4031	-0.172538	0
ENSP00000485942-254-293	NonDomCDR	37.6923	-0.8	53.2525	0.0545425	0
ENSP00000485942-137-227	NonDomCDR	51	-0.621111	73.8022	0.0204659	0
ENSP00000478594-225-256	NonDomCDR	31.9355	-0.735484	76.3156	-0.0620844	0
ENSP00000470910-112-146	DomCDR	60.2941	-1.26471	68.1143	0.0128629	0
ENSP00000013125-314-363	NonDomCDR	65.9184	-1.12041	48.436	0.00531	1.8
ENSP00000013125-365-486	NonDomCDR	53.3058	-0.956198	70.091	-0.0263074	0
ENSP00000471896-109-191	NonDomCDR	65.3659	-0.553659	59.994	0.0416506	4.6988
ENSP00000431971-1-76	NonDomCDR	69.3333	-0.685333	81.3553	0.0340355	4.73684
ENSP00000431971-93-354	NonDomCDR	46.092	-1.11533	68.4466	-0.105648	0
ENSP00000230859-563-595	NonDomCDR	64.0625	-1.3875	38.0455	-0.0434939	0
ENSP00000230859-52-192	NonDomCDR	42.9286	-0.536429	81.6525	0.0128745	0
ENSP00000230859-644-792	NonDomCDR	55.3378	-0.703378	54.9732	0.0974094	0
ENSP00000333253-445-474	NonDomCDR	90.6897	-0.4	80.9333	0.0126433	0
ENSP00000333253-372-403	NonDomCDR	53.5484	-1.26774	60.9188	-0.118334	0
ENSP00000333253-220-269	NonDomCDR	75.3061	-0.844898	41.788	-0.100438	0
ENSP00000333253-712-767	NonDomCDR	53.0909	-0.796364	92.2839	0.00845536	6.42857
ENSP00000333253-286-354	NonDomCDR	60.2941	-1.20441	40.6449	-0.20512	2.6087
ENSP00000333253-100-201	NonDomCDR	68.3168	-0.9	84.6167	-0.0613353	5.58824
ENSP00000333253-480-586	NonDomCDR	58.8679	-1.2	63.7215	-0.0962692	1.68224
ENSP00000470298-2002-2036	NonDomCDR	31.7647	-1.3	102.466	-0.179971	0
ENSP00000470298-1526-1564	DomCDR	64.4737	-1.76842	57.9949	-0.213518	0
ENSP00000470298-1632-1676	DomCDR	62.2727	-1.79091	72.7022	-0.207342	0
ENSP00000470298-1-47	NonDomCDR	40.4348	-0.378261	72.4106	0.0470085	9.57447
ENSP00000470298-1937-1991	DomCDR	75.9259	-1.36296	98.5636	-0.0771418	3.81818
ENSP00000470298-1111-1171	DomCDR	89.6667	-1.09667	78.0852	-0.131431	0
ENSP00000470298-1297-1371	DomCDR	79.3243	-1.10135	63.8667	-0.0938573	0
ENSP00000470298-1178-1271	DomCDR	83.0108	-1.25591	65.8298	-0.152127	0.319149
ENSP00000470298-1401-1500	DomCDR	69.3939	-1.33535	81.308	-0.134363	0
ENSP00000255416-1-79	NonDomCDR	53.9744	-0.635897	88.5063	-0.0777557	0
ENSP00000467540-295-333	NonDomCDR	59.7368	-0.236842	114.841	-0.0503026	0
ENSP00000467540-26-105	NonDomCDR	50.8861	-0.798734	105.498	-0.037255	0
ENSP00000467540-157-271	NonDomCDR	44.6491	-0.726316	93.5826	0.0689226	0
ENSP00000298532-104-139	NonDomCDR	83.7143	-0.937143	38.55	-0.101022	6.66667
ENSP00000298532-840-917	NonDomCDR	76.1039	-0.735065	62.1603	-6.67e-05	0
ENSP00000298532-1-86	NonDomCDR	62	-1.24235	67.7942	-0.15442	8.02326
ENSP00000298532-504-664	NonDomCDR	41.6875	-0.901875	97.7304	-0.021295	1.30435
ENSP00000310036-126-160	NonDomCDR	65.8824	-0.494118	36.1314	0.0455029	0
ENSP00000310036-34-88	NonDomCDR	48.7037	-0.824074	27.6127	0.0483327	0.545455
ENSP00000310036-321-385	DomCDR	35.1562	-1.23438	24.2908	-0.0826431	0.461538
ENSP00000356257-3-68	DomCDR	76.3077	-1.04462	62.9515	-0.0481485	0
ENSP00000356257-73-338	NonDomCDR	34.9811	-1.85283	33.6165	-0.343931	0
ENSP00000305244-391-479	NonDomCDR	78.8636	-0.420455	83.227	0.0403146	0
ENSP00000305244-189-357	NonDomCDR	59.5833	-0.838095	54.6012	-0.130902	0
ENSP00000404782-268-320	NonDomCDR	67.5	-1.35385	58.6925	-0.0902642	0
ENSP00000404782-449-522	NonDomCDR	40.274	-1.03836	40.6946	-0.132611	2.02703
ENSP00000404782-155-257	NonDomCDR	50.6863	-0.808824	81.9223	0.0115981	2.62136
ENSP00000404782-672-775	NonDomCDR	53.1068	-0.973786	73.4913	-0.0868317	2.88462
ENSP00000404782-325-437	NonDomCDR	60.2679	-1.30982	80.4912	-0.108347	2.38938
ENSP00000404782-546-659	NonDomCDR	63.8053	-0.732743	52.4465	0.0449351	1.57895
ENSP00000404782-780-920	DomCDR	53.7143	-1.20929	88.9369	-0.0613972	3.82979
ENSP00000404782-1-142	NonDomCDR	54.8227	-0.87234	80.9782	-0.0108451	0.633803
ENSP00000322775-160-190	DomCDR	65	-0.823333	80.3161	-0.0360323	0
ENSP00000322775-83-116	NonDomCDR	50.303	-1.38788	133.097	-0.00314118	0
ENSP00000322775-1-80	NonDomCDR	49.4937	-0.970886	74.3887	-0.00976	2.625
ENSP00000282633-808-840	NonDomCDR	48.75	-1.3625	37.6424	-0.192309	0
ENSP00000282633-700-734	NonDomCDR	57.3529	-0.8	79.4171	-0.104197	1.71429
ENSP00000282633-627-663	NonDomCDR	51.6667	-1.22222	85.5892	-0.137151	0.810811
ENSP00000282633-764-806	NonDomCDR	62.619	-0.92619	40.2209	-0.0366116	2.7907
ENSP00000282633-898-958	NonDomCDR	48.6667	-1.46	39.2344	-0.196297	0.983607
ENSP00000282633-1127-1229	NonDomCDR	58.4314	-0.867647	44.0534	-0.108756	1.16505
ENSP00000282633-419-551	NonDomCDR	38.4848	-1.16591	50.3654	-0.150719	2.03008
ENSP00000282633-197-410	NonDomCDR	44.9296	-1.31127	69.9869	-0.177345	1.26168
ENSP00000363040-34-195	NonDomCDR	43.913	-0.508075	64.1105	0.0233636	0
ENSP00000246104-117-149	NonDomCDR	21.875	-1.14375	99.3788	-0.141891	0
ENSP00000246104-28-95	NonDomCDR	54.1791	-0.889552	80.1897	-0.0131529	0
ENSP00000400972-210-239	NonDomCDR	40.3448	-0.893103	67.5633	0.0796433	0
ENSP00000400972-87-118	NonDomCDR	47.4194	-0.974194	45.1063	0.0732469	0
ENSP00000400972-18-54	NonDomCDR	46.3889	-0.586111	57.7514	-0.0204919	0
ENSP00000459223-1-70	DomCDR	72.029	-0.513043	63.75	-0.0399757	2.14286
ENSP00000352962-341-376	NonDomCDR	64	-0.94	36.5028	-0.0403389	0
ENSP00000352962-692-727	NonDomCDR	81.1429	-0.502857	51.9917	-0.0104778	0
ENSP00000352962-643-689	NonDomCDR	67.8261	-0.371739	28.866	0.0181255	0
ENSP00000352962-385-629	NonDomCDR	68.1557	-0.636475	81.5494	-0.0129318	0
ENSP00000265081-1-129	NonDomCDR	57.5	-0.644531	76.3132	-0.057786	0.232558
ENSP00000354772-6-44	NonDomCDR	38.4211	-1.43684	129.256	-0.0946744	0
ENSP00000402460-864-955	NonDomCDR	26.9231	-1.66484	80.5457	-0.212605	0
ENSP00000344724-45-85	NonDomCDR	78	-1.0075	62.2488	0.0297463	0
ENSP00000344724-181-253	NonDomCDR	31.25	-1.50417	76.763	-0.222695	0
ENSP00000344724-374-484	NonDomCDR	63.9091	-0.306364	110.678	0.137552	0
ENSP00000354842-379-413	NonDomCDR	71.7647	-0.364706	66.1914	0.168489	0
ENSP00000354842-43-86	NonDomCDR	70.2326	-0.55814	97.85	0.124895	0
ENSP00000354842-415-465	NonDomCDR	76	-0.686	76.4098	0.131229	0
ENSP00000354842-129-268	NonDomCDR	44.2446	-1.15755	56.4286	-0.0714107	0
ENSP00000261302-305-490	NonDomCDR	33.8378	-1.41784	78.4554	-0.118077	0
ENSP00000413697-380-413	NonDomCDR	71.2121	-0.775758	34.8353	-0.0805029	0
ENSP00000413697-305-339	NonDomCDR	63.5294	-0.605882	41.88	-0.0488057	0
ENSP00000413697-454-493	NonDomCDR	52.8205	-0.966667	56.2925	-0.1079	5.25
ENSP00000413697-162-223	NonDomCDR	60.8197	-0.867213	83.7081	-0.0164242	1.45161
ENSP00000357292-489-533	NonDomCDR	35.9091	-0.375	70.3089	0.0425422	0
ENSP00000357292-292-367	NonDomCDR	28.6667	-0.916	61.3803	0.0331829	1.18421
ENSP00000357292-75-157	NonDomCDR	39.6341	-0.528049	84.1301	-0.0325434	0
ENSP00000357292-176-275	NonDomCDR	67.0707	-0.693939	47.893	0.174319	0
ENSP00000291672-33-80	DomCDR	54.0426	-0.614894	61.3604	0.0686542	0
ENSP00000291672-90-138	DomCDR	59.1667	-0.566667	70.6102	0.0688592	0
ENSP00000386037-40-90	NonDomCDR	21.6	-1.7	76.2392	-0.211675	0
ENSP00000483530-106-146	DomCDR	68.25	-1.9	46.1951	-0.317239	0
ENSP00000483530-505-550	DomCDR	43.7778	-0.573333	19.9935	-0.131128	0
ENSP00000483530-350-396	DomCDR	53.0435	-2.23913	96.3426	-0.266394	0
ENSP00000483530-554-627	DomCDR	57.5342	-0.947945	48.7405	-0.0709716	0
ENSP00000483530-409-485	DomCDR	75.9211	-0.805263	55.8974	-0.0537494	0
ENSP00000483530-1-100	NonDomCDR	52.4242	-0.886869	64.951	-0.028893	0
ENSP00000421491-209-250	DomCDR	57.3171	-0.907317	44.4048	-0.0783595	4.28571
ENSP00000421491-260-336	DomCDR	59.0789	-1.37237	99.4571	-0.0790286	12.0779
ENSP00000440832-185-216	NonDomCDR	3.22581	-1.55161	154.703	0.0928438	0
ENSP00000386125-516-545	NonDomCDR	13.7931	-1.73103	74.4667	-0.233867	0
ENSP00000386125-177-217	NonDomCDR	32.25	-0.27	108.978	-0.0016439	0
ENSP00000386125-29-77	NonDomCDR	46.875	-1.23333	63.3224	0.0136388	1.83673
ENSP00000386125-565-613	NonDomCDR	36.875	-1.12292	116.82	-0.0564429	0
ENSP00000444743-640-669	NonDomCDR	40.3448	-1.0931	151.417	-0.04007	0
ENSP00000444743-1039-1072	NonDomCDR	67.8788	-0.842424	59.8794	0.00683823	0
ENSP00000444743-1319-1353	NonDomCDR	37.3529	-1.16176	77.7629	-0.0319143	0
ENSP00000444743-1413-1450	NonDomCDR	50.2703	-1.33243	55.4921	-0.0333789	2.36842
ENSP00000444743-1163-1204	NonDomCDR	42.6829	-0.980488	96.2667	-0.0125881	0
ENSP00000444743-717-763	NonDomCDR	65.6522	-0.752174	79.7574	-0.0437745	0.638298
ENSP00000444743-1082-1141	NonDomCDR	79.322	-0.847458	57.6617	0.0568867	0
ENSP00000444743-791-1034	NonDomCDR	57.8601	-0.974074	56.1082	-0.0593016	0
ENSP00000429808-775-811	NonDomCDR	54.1667	-1.38889	40.2486	-0.0631135	0
ENSP00000429808-821-950	DomCDR	46.8992	-1.17907	39.7562	-0.1506	0
ENSP00000353793-1065-1113	NonDomCDR	46.875	-1.80208	44.8571	-0.351208	1.83673
ENSP00000346037-71-111	DomCDR	34.75	-0.835	79.4537	-0.255341	0
ENSP00000291906-468-554	NonDomCDR	30.6977	-1.40233	79.2747	-0.0760977	3.44828
ENSP00000351614-19-52	NonDomCDR	35.7576	-0.975758	115.065	0.0724971	8.82353
ENSP00000200453-625-658	NonDomCDR	85.7576	0.0121212	93.2059	0.148659	0
ENSP00000200453-337-556	NonDomCDR	37.9909	-1.39954	63.2882	-0.165535	0.409091
ENSP00000200453-61-334	NonDomCDR	40.5128	-1.24542	67.3212	-0.1384	0
ENSP00000344791-112-153	NonDomCDR	57.0732	-1.23171	80.5714	0.00873095	1.42857
ENSP00000344791-44-87	NonDomCDR	50	-1.52791	22.9523	-0.133664	0
ENSP00000465759-17-57	NonDomCDR	31.75	-1.45	104.156	-0.0966829	0
ENSP00000237281-208-241	NonDomCDR	59.0909	-1.56667	36.4824	-0.100656	1.76471
ENSP00000390630-1345-1376	NonDomCDR	63.2258	-0.806452	59.2531	0.0197656	0
ENSP00000390630-1290-1335	NonDomCDR	34.6667	-1.16889	74.6935	0.0145087	0
ENSP00000390630-299-367	NonDomCDR	35.8824	-1.27941	107.261	-0.0711449	0
ENSP00000390630-692-825	NonDomCDR	56.4662	-0.893233	83.4806	-0.0220104	0
ENSP00000489867-125-166	NonDomCDR	42.9268	-1.04634	79.4143	-0.0647571	2.14286
ENSP00000489867-1-50	NonDomCDR	40	-1.52041	89.4614	-0.151354	18.6
ENSP00000489867-904-963	NonDomCDR	74.4068	-0.0898305	10.9083	0.113545	0
ENSP00000489867-823-888	NonDomCDR	43.5385	-1.15846	80.6318	-0.0747788	0.454545
ENSP00000489867-188-265	NonDomCDR	58.4416	-0.928571	59.1321	-0.0385321	0.769231
ENSP00000489867-277-466	NonDomCDR	54.2857	-1.05767	45.1405	-0.120115	2.68421
ENSP00000489867-471-785	NonDomCDR	55.9873	-0.882484	64.5752	-0.0296876	5.33333
ENSP00000204679-265-305	NonDomCDR	61	-1.2675	33.0073	-0.0136756	0
ENSP00000384527-691-729	NonDomCDR	20.7895	-2.05	65.4846	-0.384972	3.84615
ENSP00000384527-130-234	NonDomCDR	38.6538	-0.878846	87.941	-0.0884057	2
ENSP00000251287-750-889	NonDomCDR	59.4245	-0.535252	100.456	0.0229679	0.857143
ENSP00000251287-1-160	NonDomCDR	21.195	-1.07799	85.4762	-0.126317	0
ENSP00000261740-1-74	NonDomCDR	48.3562	-0.658904	55.4514	-0.0319865	4.45946
ENSP00000471477-142-171	NonDomCDR	87.5862	-0.62069	75.3933	0.08449	0
ENSP00000471477-174-209	NonDomCDR	66.8571	-0.431429	100.569	0.0754583	0
ENSP00000452414-437-471	NonDomCDR	65.8824	-0.935294	38.6571	0.0960771	0
ENSP00000452414-394-430	NonDomCDR	51.3889	-0.833333	60.3703	0.133427	0
ENSP00000452414-605-641	NonDomCDR	92.2222	-0.491667	96.8514	0.0633108	0.810811
ENSP00000452414-544-588	NonDomCDR	57.7273	-1.09545	79.5844	0.108304	0
ENSP00000452414-649-822	NonDomCDR	64.3931	-0.871676	70.2236	-0.0110592	0
ENSP00000414321-90-125	NonDomCDR	47.4286	-1.95143	14.95	-0.233283	0
ENSP00000484985-102-147	NonDomCDR	76.2222	-0.502222	32.6217	-0.0369174	0
ENSP00000403208-928-971	DomCDR	61.3953	-1.2186	67.8477	-0.0543568	0
ENSP00000403208-862-909	DomCDR	24.8936	-1.47447	74.1063	-0.0641562	0
ENSP00000403208-445-532	DomCDR	56.2069	-1.08736	70.6818	-0.0169875	0
ENSP00000323967-151-191	NonDomCDR	27	-1.585	98.2756	-0.105905	2.19512
ENSP00000323967-284-411	NonDomCDR	34.7244	-1.6937	81.3641	-0.28867	0.9375
ENSP00000254605-1-49	NonDomCDR	81.6667	-0.308333	86.402	0.0333041	14.0816
ENSP00000254605-53-242	NonDomCDR	33.6508	-1.56032	71.3737	-0.203871	0
ENSP00000362187-173-323	NonDomCDR	40.9333	-1.21	71.0245	-0.00519934	0.198675
ENSP00000349351-359-389	DomCDR	81.3333	-1.12667	38.5355	-0.0998484	1.93548
ENSP00000349351-553-622	DomCDR	52.4638	-0.931884	96.1729	0.00219714	8.14286
ENSP00000255641-1-30	NonDomCDR	16.8966	-1.48966	75.58	-0.173867	2
ENSP00000255641-338-389	DomCDR	63.3333	-0.978431	30.3673	-0.0505885	1.15385
ENSP00000479735-1-151	NonDomCDR	57.9333	-0.611333	97.3954	-0.0191166	0
ENSP00000479965-309-375	NonDomCDR	54.8485	-0.884848	73.8343	0.0294672	0
ENSP00000480969-275-304	NonDomCDR	40.3448	-1.41724	53.25	-0.100547	0
ENSP00000372699-305-354	DomCDR	32.0408	-1.07143	75.508	-0.18531	0
ENSP00000372699-136-273	NonDomCDR	47.7372	-0.689051	76.4558	-0.0366514	5.43478
ENSP00000356814-287-348	NonDomCDR	46.3934	-1.65082	85.5484	-0.0912161	1.93548
ENSP00000356814-350-760	NonDomCDR	46.9024	-1.1461	76.2058	-0.0512421	0.875912
ENSP00000448979-384-420	NonDomCDR	19.1667	-2.26944	121.173	-0.350084	0.810811
ENSP00000448979-182-228	DomCDR	46.5217	-0.806522	73.9277	0.0579085	0
ENSP00000377025-156-185	NonDomCDR	33.4483	-2.28276	57.0267	-0.199923	0
ENSP00000473238-189-219	DomCDR	39	-1.47333	60.8484	-0.0480355	0
ENSP00000473238-470-517	NonDomCDR	31.2766	-1.48936	71.8937	-0.206967	0
ENSP00000386609-1526-1557	NonDomCDR	12.5806	-1.33226	56.3687	-0.0806594	0
ENSP00000386609-1-35	NonDomCDR	51.7647	-0.779412	94.5286	0.0321971	0
ENSP00000386609-307-342	NonDomCDR	36.2857	-1.71714	86.2194	-0.272703	0
ENSP00000386609-615-668	NonDomCDR	55.283	-0.983019	34.2185	-0.0665111	0
ENSP00000386609-1020-1217	NonDomCDR	55.9898	-0.872589	86.7601	-0.114124	0
ENSP00000394390-1-31	NonDomCDR	29.3333	-1.21333	52.8645	0.0263903	2.90323
ENSP00000397894-144-181	NonDomCDR	113.243	-0.0216216	50.4447	0.217024	0
ENSP00000397894-644-693	NonDomCDR	32.0408	-0.744898	118.994	-0.027218	0
ENSP00000397894-86-138	NonDomCDR	35.7692	-0.644231	36.6585	0.0523189	0
ENSP00000397894-554-632	NonDomCDR	61.6667	-0.00769231	57.9506	0.0599076	0.759494
ENSP00000397894-183-282	NonDomCDR	48.3838	-0.982828	95.153	-0.064918	0
ENSP00000397894-380-538	NonDomCDR	55.5696	-0.440506	59.0792	0.054856	0
ENSP00000397894-937-1132	NonDomCDR	56.2051	-1.04308	84.6847	-0.0574133	0
ENSP00000343886-1158-1190	NonDomCDR	76.25	-1.24375	59.7788	-0.0851273	0
ENSP00000361769-1-46	NonDomCDR	41.3333	-0.633333	72.5217	0.0195587	3.26087
ENSP00000361769-65-123	NonDomCDR	53.7931	-0.960345	80.0763	0.0415068	0
ENSP00000320869-499-539	DomCDR	51.25	-1.185	78.2854	-0.0130634	0
ENSP00000320869-128-177	NonDomCDR	67.551	-1.46327	122.64	-0.224206	0
ENSP00000320869-51-112	NonDomCDR	30.3279	-1.7082	81.6145	-0.262432	0
ENSP00000457243-1-82	NonDomCDR	42.2222	-1.21975	88.2341	-0.0716	2.92683
ENSP00000492773-70-115	NonDomCDR	28.6667	-0.982222	20.7935	-0.139461	0
ENSP00000319756-461-593	NonDomCDR	51.7424	-0.893182	68.415	0.00240977	1.12782
ENSP00000319756-820-1140	DomCDR	46.4062	-0.8775	95.3579	0.00783925	0
ENSP00000378974-367-422	NonDomCDR	67.4545	-0.361818	51.7482	0.0519071	2.67857
ENSP00000400921-160-190	NonDomCDR	52.3333	-0.316667	80.6548	-0.0774419	0
ENSP00000400921-57-91	NonDomCDR	92.3529	0.0647059	113.52	0.0801343	0
ENSP00000400921-336-372	DomCDR	43.3333	-1.52222	84.3297	-0.015027	0
ENSP00000400921-388-461	DomCDR	40.137	-1.17945	97.9122	0.0768378	0
ENSP00000454014-300-421	NonDomCDR	42.8099	-1.30992	61.382	-0.0530975	0
ENSP00000471418-1-36	NonDomCDR	52.8571	-1.1	76.6389	-0.0313667	0
ENSP00000471418-55-98	NonDomCDR	54.4186	-0.730233	24.7523	0.00159091	0
ENSP00000293771-1-47	NonDomCDR	47.3913	-1.10435	44.0191	-0.186762	0
ENSP00000293771-171-226	NonDomCDR	55.2727	-0.605455	62.2393	-0.100596	0
ENSP00000483968-233-588	NonDomCDR	51.2958	-0.56338	84.4416	0.00246685	0.758427
ENSP00000483220-95-180	NonDomCDR	44	-1.16	71.8814	-0.189963	0
ENSP00000478224-225-256	NonDomCDR	31.9355	-0.735484	76.3156	-0.0620844	0
ENSP00000487191-142-173	NonDomCDR	50.3226	-1.02258	67.7844	0.0655031	0
ENSP00000487191-97-129	NonDomCDR	72.8125	-1.06875	107.239	-0.100348	0
ENSP00000487191-862-911	NonDomCDR	61.6327	-0.820408	43.746	0.011536	1.8
ENSP00000487191-913-1189	NonDomCDR	47.3913	-1.07754	75.0834	-0.052044	0
ENSP00000478451-95-180	NonDomCDR	44	-1.16	71.8814	-0.189963	0
ENSP00000479459-93-123	NonDomCDR	55.3333	-1.56333	58.8323	-0.296419	0
ENSP00000298310-956-985	NonDomCDR	53.7931	-1.51724	47.6933	-0.18234	0
ENSP00000298310-421-454	NonDomCDR	38.1818	-2.34848	51.2147	-0.493724	0
ENSP00000298310-683-945	NonDomCDR	52.4427	-1.50573	62.8852	-0.212057	2.73764
ENSP00000462209-1-40	DomCDR	62.8205	-1.2359	65.365	-0.15812	14.25
ENSP00000462209-144-204	NonDomCDR	21.1667	-1.355	110.218	0.0395197	4.42623
ENSP00000489860-447-563	NonDomCDR	47.1552	-1.2931	99.6991	-0.0475026	1.79487
ENSP00000489860-977-1249	NonDomCDR	44.9265	-1.30441	67.9209	-0.0973663	0
ENSP00000357051-139-174	DomCDR	72.5714	-0.665714	78.2472	-0.0250278	5
ENSP00000357051-86-126	DomCDR	53.75	-0.885	47.161	-0.068122	0
ENSP00000357051-1-64	NonDomCDR	54.6032	-0.677778	61.2859	-0.106328	10.7812
ENSP00000267484-197-253	NonDomCDR	73.0357	-1.43393	35.3649	-0.203002	0
ENSP00000267484-120-185	NonDomCDR	76.4615	-0.4	71.3424	0.0662682	0
ENSP00000267484-1-101	NonDomCDR	48.1	-0.663	50.2594	-0.0416119	0
ENSP00000267484-260-579	NonDomCDR	61.2539	-0.807524	86.0219	-0.0499341	0.5625
ENSP00000389870-248-287	NonDomCDR	47.6923	-1.04872	66.82	0.0541275	0
ENSP00000389870-187-243	NonDomCDR	48.9286	-0.805357	105.161	0.0837491	0
ENSP00000287008-1202-1235	NonDomCDR	65.4545	-0.49697	63.2529	-0.0156265	0
ENSP00000287008-1131-1191	NonDomCDR	42.3333	-0.971667	110.548	0.0166836	0.491803
ENSP00000451803-1005-1059	NonDomCDR	61.6667	-0.855556	50.98	-0.0107745	0
ENSP00000451803-533-627	NonDomCDR	38.5106	-1.18191	69.5074	-0.00471684	0
ENSP00000451803-805-908	DomCDR	26.699	-1.23301	67.5394	-0.0451481	0
ENSP00000445752-82-146	NonDomCDR	48.75	-0.904687	90.0923	0.0890754	0
ENSP00000445752-150-456	NonDomCDR	55.1307	-0.773529	60.9824	0.106794	0.684039
ENSP00000167106-1-63	NonDomCDR	42.5806	-0.822581	78.127	-0.0917397	0
ENSP00000167106-298-365	NonDomCDR	36.4179	-1.6806	82.9162	-0.140854	0
ENSP00000299798-656-687	NonDomCDR	19.0323	-1.80323	9.18437	-0.219078	0
ENSP00000299798-809-877	NonDomCDR	68.9706	-0.747059	103.143	0.0561116	0
ENSP00000488010-1320-1351	NonDomCDR	50.3226	-1.67097	74.4656	-0.122509	0
ENSP00000488010-1-34	NonDomCDR	26.6667	-1.42727	99.3294	-0.0886	0.882353
ENSP00000488010-1266-1302	NonDomCDR	35.2778	-0.797222	77.5568	0.0339135	0
ENSP00000488010-910-949	NonDomCDR	74.8718	-0.487179	97.0825	0.0537975	0
ENSP00000488010-753-802	NonDomCDR	65.7143	-0.732653	67.806	-0.057378	0
ENSP00000488010-1162-1235	NonDomCDR	64.1096	-1.13288	55.323	-0.077077	0
ENSP00000488010-806-891	NonDomCDR	65.4118	-0.729412	63.8081	-0.0710674	0.348837
ENSP00000488010-995-1110	NonDomCDR	61.1304	-0.589565	72.6397	0.0217983	0
ENSP00000360899-102-132	NonDomCDR	61.6667	-1.69333	88.0548	-0.205319	0
ENSP00000332488-632-668	NonDomCDR	97.7778	0.0638889	55.7	0.182268	0
ENSP00000332488-546-630	NonDomCDR	54.7619	-0.986905	53.5612	-0.0572271	0
ENSP00000460897-408-521	NonDomCDR	59.7345	-0.681416	67.3447	0.00259298	0.263158
ENSP00000468922-158-190	NonDomCDR	70	-0.61875	59.1091	0.0525333	6.36364
ENSP00000468922-193-229	NonDomCDR	32.7778	-1.24722	62.8784	0.0283838	6.48649
ENSP00000353010-1374-1437	NonDomCDR	57.3016	-0.834921	69.6812	-0.0132687	0
ENSP00000471224-143-176	DomCDR	44.5455	-0.957576	89.4412	-0.000667647	0
ENSP00000230053-51-82	NonDomCDR	53.5484	-1.64516	120.963	-0.0688156	0
ENSP00000239440-207-241	NonDomCDR	57.3529	-1.15294	51.7829	-0.03966	0
ENSP00000239440-1418-1544	NonDomCDR	50.3175	-0.925397	94.2787	-0.00334173	1.41732
ENSP00000239440-55-195	NonDomCDR	55.8571	-0.745714	91.7894	0.00679503	0
ENSP00000415654-251-281	DomCDR	45.3333	-1.35667	92.1194	0.0265129	0
ENSP00000415654-127-216	NonDomCDR	37.3034	-1.07753	74.5467	-0.0163456	2
ENSP00000415654-1-112	NonDomCDR	40.3604	-1.01712	98.1018	0.0409321	0
ENSP00000488302-98-227	DomCDR	44.4186	-0.374419	22.1885	-0.172988	0
ENSP00000488302-437-578	NonDomCDR	51.5603	-0.785106	62.9613	-0.165698	0
ENSP00000378500-592-622	DomCDR	81.3333	-0.546667	14.0161	-0.0260774	0
ENSP00000378500-141-174	NonDomCDR	65.1515	-0.836364	33.0353	0.00826177	0
ENSP00000378500-1008-1046	DomCDR	41.3158	-1.46053	42.5154	-0.177736	0
ENSP00000378500-1-74	NonDomCDR	35.0685	-0.821918	64.4338	-0.116242	4.86486
ENSP00000445775-332-448	NonDomCDR	43.1034	-1.11897	53.0726	-0.0982299	0
ENSP00000278919-85-122	DomCDR	84.3243	-1.10811	93.1895	-0.0519763	0
ENSP00000278919-124-208	DomCDR	65	-1.18333	103.704	-0.134915	0
ENSP00000354742-936-968	NonDomCDR	21.5625	-2.04375	115.148	-0.308376	0.909091
ENSP00000380933-113-153	DomCDR	75.75	-1.135	69.478	-0.0459098	0
ENSP00000380933-18-60	DomCDR	69.7619	-0.897619	91.0395	0.100223	0
ENSP00000391854-1-31	NonDomCDR	65	-0.97	43.5065	-0.0724	1.93548
ENSP00000384610-386-418	NonDomCDR	70.3125	-0.8625	46.6939	-0.126433	0
ENSP00000384610-1304-1342	NonDomCDR	46.3158	-1.20263	77.3564	-0.0374128	0
ENSP00000429273-805-839	DomCDR	5.88235	-1.67059	13.86	-0.0672	0
ENSP00000429273-883-927	NonDomCDR	42.2727	-1.43409	18.2844	-0.240136	0
ENSP00000406293-106-169	NonDomCDR	26.3492	-1.68095	100.442	-0.197461	1.40625
ENSP00000367177-906-938	NonDomCDR	30.625	-1.50937	20.4667	-0.259255	0
ENSP00000367177-779-826	NonDomCDR	45.9574	-0.697872	56.8833	-0.06835	0
ENSP00000367177-830-901	NonDomCDR	42.9577	-0.370423	69.4611	0.00509583	0
ENSP00000481452-93-123	NonDomCDR	55.3333	-1.56333	58.8323	-0.296419	0
ENSP00000361740-1-49	DomCDR	20.4167	-2.17917	92.1224	-0.397545	0
ENSP00000484205-1-45	NonDomCDR	60	-0.627273	67.3956	0.0667733	0
ENSP00000484205-57-104	NonDomCDR	47.8723	-1.40851	89.5417	-0.0634854	0
ENSP00000477941-1-45	NonDomCDR	60	-0.627273	67.3956	0.0667733	0
ENSP00000477941-57-104	NonDomCDR	47.8723	-1.40851	89.5417	-0.0634854	0
ENSP00000480725-8-40	NonDomCDR	58.125	-1.40938	129.291	-0.2799	0
ENSP00000480725-331-368	DomCDR	60.5405	-1.55405	77.8421	-0.133989	0
ENSP00000298229-1130-1193	NonDomCDR	83.8095	-0.506349	83.2516	0.0632172	3.75
ENSP00000298229-113-181	NonDomCDR	58.9706	-0.829412	64.2957	-0.0808971	8.69565
ENSP00000298229-897-1128	NonDomCDR	55.4113	-0.755411	80.6668	-0.0202444	0
ENSP00000450439-122-155	NonDomCDR	35.4545	-1.86667	109.118	-0.229324	0
ENSP00000450439-83-117	NonDomCDR	28.8235	-1.23824	61.0114	-0.110971	0
ENSP00000354927-21-61	NonDomCDR	29.25	-1.6175	68.4829	-0.0359561	27.8049
ENSP00000354927-254-303	NonDomCDR	33.8776	-1.38776	77.052	-0.014158	4.2
ENSP00000354927-178-234	NonDomCDR	48.75	-1.22679	89.8228	0.0319491	2.63158
ENSP00000380904-193-247	NonDomCDR	54.2593	-1.35926	61.1309	-0.286236	0.545455
ENSP00000380904-1-178	NonDomCDR	62.7684	-1.16045	57.5185	-0.076909	0
ENSP00000385727-186-215	NonDomCDR	81.0345	-0.251724	59.2967	0.116957	1
ENSP00000385727-1535-1566	NonDomCDR	59.6774	-1.00968	26.4312	-0.138513	0
ENSP00000385727-1759-1790	NonDomCDR	72.2581	-0.790323	69.7	-0.0810687	0.9375
ENSP00000385727-1709-1744	NonDomCDR	36.2857	-0.825714	102.994	0.00515278	2.5
ENSP00000385727-1103-1142	NonDomCDR	45.1282	-0.774359	131.555	0.0725825	0.75
ENSP00000385727-228-273	NonDomCDR	45.7778	-0.935556	79.637	0.0518804	3.26087
ENSP00000385727-1225-1274	NonDomCDR	41.8367	-1.62653	89.866	-0.122058	0
ENSP00000385727-1808-1865	NonDomCDR	65.0877	-0.664912	98.3155	-0.0316931	0.517241
ENSP00000385727-91-171	NonDomCDR	72	-0.6875	91.2173	-0.00105679	0
ENSP00000385727-1-82	NonDomCDR	44.8148	-0.574074	68.7598	-0.0110902	6.58537
ENSP00000385727-1578-1675	NonDomCDR	60.5155	-0.842268	63.0571	-0.0518194	0
ENSP00000385727-918-1083	NonDomCDR	52.0606	-1.00727	66.9693	-0.061456	0
ENSP00000385727-2385-2623	NonDomCDR	47.6891	-0.97605	52.9695	-0.0646774	0.376569
ENSP00000385727-1288-1533	NonDomCDR	60.0816	-0.991837	97.6394	0.0080248	0.609756
ENSP00000385727-1875-2383	NonDomCDR	44.2717	-1.17756	65.5299	-0.0962672	0.117878
ENSP00000327104-768-798	DomCDR	26	-1.1	71.1742	-0.131968	0
ENSP00000327104-50-83	NonDomCDR	100.606	-0.463636	29.9	0.0509353	5.29412
ENSP00000327104-199-240	NonDomCDR	14.3902	-1.28049	62.9405	-0.0908095	0
ENSP00000327104-100-160	NonDomCDR	52	-0.886667	66.5787	0.0217738	0.491803
ENSP00000318821-614-643	NonDomCDR	57.2414	-0.634483	95.73	-0.0127833	1
ENSP00000318821-222-253	DomCDR	100.968	-0.896774	50.3156	-0.00416563	0
ENSP00000318821-167-219	DomCDR	69.6154	-1.09231	50.666	-0.146134	0
ENSP00000318821-80-158	NonDomCDR	37.5641	-0.953846	45.281	-0.0747797	0
ENSP00000340434-78-108	NonDomCDR	52	-0.556667	47.8258	0.126406	0
ENSP00000342637-187-217	NonDomCDR	39	-1.52333	110.752	-0.0875032	0
ENSP00000355773-137-168	NonDomCDR	37.7419	-1.4	81.6344	-0.0447094	0
ENSP00000355773-1-36	NonDomCDR	78.2857	-0.825714	100.492	0.0407667	17.5
ENSP00000366936-353-383	NonDomCDR	16.3333	-1.97667	137.603	-0.116439	1.93548
ENSP00000366936-10-51	NonDomCDR	26.3415	-1.78293	102.831	-0.142993	14.2857
ENSP00000366936-235-340	NonDomCDR	42.7619	-1.43429	56.8009	-0.121018	3.67925
ENSP00000349677-393-436	NonDomCDR	33.9535	-2.09302	38.5682	-0.315168	0
ENSP00000444459-95-130	NonDomCDR	61.1429	-0.817143	56.4889	-0.0126	0
ENSP00000444459-14-66	NonDomCDR	52.5	-0.996154	51.1453	0.0250509	9.62264
ENSP00000355599-1-31	NonDomCDR	9.66667	-2.18	68.2968	-0.179161	0.967742
ENSP00000263681-403-464	DomCDR	44.7541	-1.10656	56.2903	-0.0918565	7.74194
ENSP00000263681-146-246	DomCDR	31.5	-0.981	45.1248	-0.0990653	0.29703
ENSP00000263681-249-393	DomCDR	58.8194	-1.26736	92.7421	-0.186641	1.24138
ENSP00000357631-1-30	NonDomCDR	47.2414	-1.7931	158.463	0.0462167	1
ENSP00000357631-280-345	NonDomCDR	43.5385	-1.19538	65.0818	-0.0754379	0.454545
ENSP00000357631-375-450	NonDomCDR	49.4667	-1.684	80.7487	-0.202358	0
ENSP00000257749-154-184	NonDomCDR	10	-1.84	117.129	-0.277216	0
ENSP00000257749-777-819	NonDomCDR	27.8571	-1.21429	63.1302	-0.0122814	0
ENSP00000257749-249-329	NonDomCDR	49	-0.8975	69.7531	-0.0705198	0
ENSP00000261439-563-593	NonDomCDR	58.6667	-1.18333	157.697	-0.0197613	2.90323
ENSP00000261439-204-235	NonDomCDR	15.8065	-1.67097	94.25	-0.0885844	2.8125
ENSP00000261439-595-658	NonDomCDR	41.746	-1.25238	67.2703	-0.016075	1.40625
ENSP00000357300-210-292	NonDomCDR	46.3415	-1.87317	61.5349	-0.251552	0
ENSP00000385657-1-72	NonDomCDR	49.4366	-1.37887	77.8944	-0.17865	6.25
ENSP00000348010-1-30	NonDomCDR	30	-1.35862	10.7467	0.0160833	0
ENSP00000348010-34-66	NonDomCDR	60.9375	-0.6875	88.8667	-0.0103182	0.909091
ENSP00000348010-599-635	NonDomCDR	27.2222	-1.89167	70.9189	-0.300462	0
ENSP00000391646-511-592	DomCDR	25.3086	-2.43951	105.671	-0.460628	6.58537
ENSP00000391646-259-368	DomCDR	43.0275	-1.47706	50.1309	-0.19836	0
ENSP00000236925-1324-1359	NonDomCDR	28	-1.34571	24.1972	-0.134403	0
ENSP00000236925-1026-1081	NonDomCDR	44.1818	-1.47455	57.3304	-0.203841	0
ENSP00000236925-591-647	NonDomCDR	78.2143	-0.733929	55.1965	0.0144579	1.57895
ENSP00000236925-1089-1152	NonDomCDR	67.9365	-0.993651	65.5922	-0.115895	0.9375
ENSP00000236925-1174-1240	NonDomCDR	43.0303	-2.16212	103.466	-0.240036	0.447761
ENSP00000236925-1242-1321	NonDomCDR	72.6582	-0.888608	63.2662	-0.0236237	2.25
ENSP00000236925-809-891	NonDomCDR	59.6341	-1.28293	60.8265	-0.157114	2.16867
ENSP00000236925-905-1021	NonDomCDR	58.0172	-1.02414	89.5291	0.0513171	0
ENSP00000372023-1-95	NonDomCDR	34.2553	-1.10532	103.373	-0.00520632	41.0526
ENSP00000257177-30-63	NonDomCDR	47.2727	-1.99394	63.1794	-0.256074	0
ENSP00000257177-583-618	NonDomCDR	22.5714	-2.10286	46.6	-0.414183	0
ENSP00000257177-1535-1582	DomCDR	68.5106	-0.46383	29.6771	0.0935813	0
ENSP00000257177-199-264	NonDomCDR	48	-1.22462	69.6	-0.114892	0
ENSP00000257177-81-185	NonDomCDR	62.9808	-0.988462	58.9686	-0.161434	0
ENSP00000257177-1387-1502	DomCDR	52.6957	-0.846957	114.541	0.0571905	0
ENSP00000317786-894-923	NonDomCDR	40.6897	-1.07931	58.73	-0.105577	0
ENSP00000317786-1486-1517	DomCDR	78.7097	-1.90323	64.375	-0.209316	0
ENSP00000317786-1520-1554	DomCDR	69.1176	-0.9	58.22	-0.0332686	0
ENSP00000317786-1-39	NonDomCDR	28.4211	-1.98158	99.3362	-0.165454	31.5385
ENSP00000317786-703-744	NonDomCDR	21.4634	-1.27805	111.181	-0.0796952	0
ENSP00000317786-1408-1467	DomCDR	64.7458	-0.972881	38.815	-0.0701783	0
ENSP00000317786-582-691	NonDomCDR	58.1651	-1.18899	76.18	-0.113895	3
ENSP00000450849-95-124	NonDomCDR	17.2414	-1.62069	51.3767	-0.17398	0
ENSP00000488423-2266-2296	DomCDR	22.6667	-0.74	40.5	0.138361	0
ENSP00000488423-1988-2019	NonDomCDR	50.3226	-0.0677419	31.3969	0.146556	0
ENSP00000488423-1953-1986	NonDomCDR	47.5758	-0.145455	14.7853	0.137741	0
ENSP00000488423-2129-2187	DomCDR	72.2414	-0.251724	24.7746	0.127015	0
ENSP00000488423-2031-2103	NonDomCDR	51.3889	-0.123611	38.6863	0.144356	0
ENSP00000488423-1816-1933	NonDomCDR	39.2308	-0.336752	35.1059	0.126018	0
ENSP00000413098-673-707	NonDomCDR	59.7059	-0.829412	54.8943	-0.0701971	0
ENSP00000413098-1182-1224	NonDomCDR	39.2857	-1.32381	41.8512	0.0725326	0
ENSP00000413098-752-802	NonDomCDR	68	-0.032	111.137	0.194971	0.588235
ENSP00000413098-831-882	NonDomCDR	80.3922	-0.584314	57.525	0.0120962	0
ENSP00000413098-1-60	NonDomCDR	61.1864	-0.688136	110.9	0.04999	1.5
ENSP00000413098-1269-1349	NonDomCDR	54.75	-1.1675	51.5457	-0.0865333	0
ENSP00000413098-955-1152	NonDomCDR	73.1472	-0.767005	58.7525	0.0611798	0
ENSP00000310861-523-634	NonDomCDR	13.1532	-0.718919	56.4027	0.00443393	1.07143
ENSP00000431669-459-488	NonDomCDR	50.3448	-1.58621	67.5233	-0.0858367	0
ENSP00000431669-627-656	NonDomCDR	50.3448	-1.91379	46.01	-0.289147	0
ENSP00000431669-691-746	DomCDR	58.7273	-1.31273	29.1232	-0.176364	0
ENSP00000431669-8-455	NonDomCDR	55.66	-1.24094	64.5308	-0.0574676	0
ENSP00000306756-114-147	NonDomCDR	26.6667	-1.40303	49.4853	-0.0208853	0
ENSP00000324205-1-36	NonDomCDR	44.5714	-1.19714	92.4167	0.0257444	0.833333
ENSP00000324205-176-213	DomCDR	84.3243	-0.940541	66.5711	-0.09085	0.789474
ENSP00000324205-215-262	NonDomCDR	93.4043	-0.689362	70.675	-0.135288	0
ENSP00000284878-269-302	NonDomCDR	56.0606	-1.3	54.4	0.0100235	4.41176
ENSP00000284878-305-343	NonDomCDR	33.4211	-1.05	90.1744	-0.00682564	10
ENSP00000482591-332-365	NonDomCDR	26.6667	-1.91818	145.815	-0.0217529	0
ENSP00000334379-266-295	NonDomCDR	80.6897	-0.72069	59.7233	0.0822833	0
ENSP00000334379-1825-1854	NonDomCDR	40.3448	-1.52069	113.857	0.0542967	0
ENSP00000334379-493-523	NonDomCDR	55.3333	-1.71	82.7258	-0.187661	0
ENSP00000334379-1911-1942	NonDomCDR	56.7742	-0.93871	64.7094	0.0210187	0
ENSP00000334379-1569-1601	NonDomCDR	66.875	-1.1125	93.7818	0.0189909	0
ENSP00000334379-2290-2334	NonDomCDR	82.2727	-0.579545	52.1267	0.0841933	0.666667
ENSP00000334379-719-795	NonDomCDR	65.5263	-0.810526	70.6753	0.0258325	0.38961
ENSP00000334379-2162-2269	NonDomCDR	52.9907	-0.993458	73.9824	-0.0537444	0
ENSP00000334379-1966-2119	NonDomCDR	53.5948	-0.969935	84.889	-0.0078552	0.194805
ENSP00000477118-49-84	DomCDR	33.4286	-1.36857	87.6306	-0.139475	0
ENSP00000349891-291-505	NonDomCDR	54.2056	-1.43084	52.1488	-0.167964	0
ENSP00000398422-196-236	NonDomCDR	59	-0.8825	64.4317	-0.0655634	0
ENSP00000398422-247-421	NonDomCDR	52.8161	-1.03391	98.672	0.0133949	0.514286
ENSP00000362206-127-161	NonDomCDR	51.7647	-1.13824	81.3829	-0.00673714	0
ENSP00000362206-32-92	NonDomCDR	65	-1.07333	71.3115	0.00268525	2.95082
ENSP00000450392-222-258	NonDomCDR	59.7222	-0.597222	93.7595	0.0052	0
ENSP00000450392-740-787	NonDomCDR	48.0851	-0.389362	64.3917	-0.054575	0
ENSP00000450392-664-737	NonDomCDR	41.5068	-0.843836	71.7432	0.00603784	0
ENSP00000450392-447-650	NonDomCDR	39.5074	-1.37685	64.1623	-0.137242	0
ENSP00000364956-232-314	NonDomCDR	45.2439	-1.09878	67.7229	-0.0689602	0
ENSP00000364956-462-554	NonDomCDR	58.2609	-0.803261	63.1387	-0.0256484	0
ENSP00000364956-318-459	NonDomCDR	45.0355	-1.15887	73.7627	-0.0949986	0.422535
ENSP00000272163-48-110	NonDomCDR	33.2258	-1.67419	112.244	-0.0930635	0
ENSP00000300146-249-290	DomCDR	83.1707	0.0219512	104.214	0.19485	1.42857
ENSP00000300146-148-198	DomCDR	78	-0.824	100.273	0.019549	5.29412
ENSP00000300146-5-84	DomCDR	61.7722	-1.22025	40.43	-0.14976	0.375
ENSP00000300146-311-404	DomCDR	41.0753	-1.44839	74.3638	0.021733	0
ENSP00000396363-37-82	NonDomCDR	24	-0.735556	61.9609	0.0659087	10.4348
ENSP00000396363-372-422	NonDomCDR	52.8	-0.612	76.9275	0.0671176	7.05882
ENSP00000396363-170-234	NonDomCDR	33.5938	-1.1125	64.7215	-0.0173554	0
ENSP00000396363-254-358	NonDomCDR	52.5962	-0.238462	53.1343	0.118023	2.57143
ENSP00000396363-440-590	NonDomCDR	63.9333	-0.875333	56.3735	-0.0356629	0.794702
ENSP00000332806-131-186	NonDomCDR	56.9091	-1.09273	55.1607	-0.0284071	0
ENSP00000386655-26-57	DomCDR	28.3871	-1.84194	63.2469	-0.125822	0
ENSP00000364150-41-73	NonDomCDR	33.75	-1.15312	81.5879	-0.0724758	0
ENSP00000244573-1-37	NonDomCDR	52.2222	-0.658333	61.5757	-0.275246	0
ENSP00000244573-101-215	NonDomCDR	43.0702	-1.17895	6.93304	-0.352792	0
ENSP00000463287-268-320	NonDomCDR	41.3462	-1.22308	73.2	0.040417	0
ENSP00000463287-137-194	NonDomCDR	53.6842	-0.121053	101.181	-0.0101052	0
ENSP00000463287-22-82	NonDomCDR	57.1667	-0.33	80.7918	-0.0430377	0
ENSP00000477213-266-306	NonDomCDR	24.5	-1.045	80.2366	0.0762683	3.65854
ENSP00000477213-311-365	NonDomCDR	47.037	-1.27037	86.3655	-0.130871	2.18182
ENSP00000477213-37-122	NonDomCDR	76	-0.752941	54.3651	-0.0427628	0
ENSP00000477213-124-262	NonDomCDR	48.2609	-1.09203	72.6504	-0.0896036	1.07914
ENSP00000297837-23-58	DomCDR	59.1429	-0.651429	50.7694	-0.160742	0
ENSP00000297837-476-559	NonDomCDR	68.3133	-0.768675	46.2226	-0.0292726	0
ENSP00000297837-565-783	NonDomCDR	48.8073	-0.827982	78.4763	-0.00756667	0.821918
ENSP00000356057-1-98	NonDomCDR	34.5361	-0.859794	83.751	-0.0430551	0.612245
ENSP00000296953-442-494	NonDomCDR	43.0769	-1.67115	62.3377	-0.0893736	0
ENSP00000296953-276-423	NonDomCDR	50.4082	-1.30884	72.8676	-0.161286	0
ENSP00000342709-195-244	DomCDR	29.7959	-1.22653	73.738	-0.01975	0
ENSP00000342709-88-145	DomCDR	54.7368	-0.826316	93.05	-0.0414345	0
ENSP00000342709-1-70	DomCDR	73.3333	-0.926087	76.9686	0.0160843	0
ENSP00000480427-112-168	NonDomCDR	34.8214	-1.30357	49.3579	-0.144958	0
ENSP00000482030-138-169	NonDomCDR	34.5161	-1.5129	45.2375	-0.124931	0
ENSP00000295598-7-37	NonDomCDR	29.3333	-2.23333	10.4935	-0.461835	0
ENSP00000352091-200-230	DomCDR	68.3333	-0.88	20.2742	-0.00911936	0
ENSP00000352091-884-948	NonDomCDR	62.5	-1.06563	103.206	-0.127783	8.76923
ENSP00000352091-516-591	NonDomCDR	56.1333	-0.990667	40.9697	-0.0579487	9.47368
ENSP00000352091-608-686	NonDomCDR	48.7179	-1.18077	48.6747	-0.0248937	20.5063
ENSP00000435667-1-63	NonDomCDR	56.6129	-1.11613	65.4603	-0.115725	0.952381
ENSP00000487879-151-193	DomCDR	48.8095	-2.06429	14.5837	-0.297651	0
ENSP00000331816-118-154	NonDomCDR	32.5	-1.84444	99.4919	-0.155743	0
ENSP00000376188-330-363	NonDomCDR	17.8788	-1.07273	73.6	-0.0443206	0
ENSP00000403948-367-430	NonDomCDR	35.5556	-0.88254	43.5969	0.0630016	0
ENSP00000286794-166-229	NonDomCDR	33.9683	-1.40635	77.0172	-0.162973	0.46875
ENSP00000212015-518-557	NonDomCDR	94.8718	-0.44359	82.9	0.078225	15.75
ENSP00000212015-566-619	NonDomCDR	53.2075	-1.09057	40.1241	-0.105369	1.66667
ENSP00000212015-662-747	NonDomCDR	45.8824	-1.02706	80.1826	-0.0725419	1.74419
ENSP00000212015-1-141	NonDomCDR	53.5714	-0.771429	67.6624	-0.145245	0.425532
ENSP00000437849-816-849	NonDomCDR	9.09091	-2.68788	44.5588	-0.540003	0
ENSP00000437849-443-485	NonDomCDR	30.2381	-1.71905	36.7256	-0.425488	0
ENSP00000437849-1391-1443	NonDomCDR	69.2308	-1.25962	38.0094	-0.158551	0
ENSP00000222329-129-166	NonDomCDR	31.6216	-0.77027	142.113	0.0581368	13.4211
ENSP00000222329-184-224	NonDomCDR	53.75	-0.875	38.861	-0.039178	9.5122
ENSP00000222329-488-548	NonDomCDR	48.8333	-1.11333	46.4311	-0.101192	8.36066
ENSP00000222329-227-311	NonDomCDR	51.0714	-0.389286	83.1188	0.140854	4.23529
ENSP00000222329-335-482	NonDomCDR	55.8503	-0.676871	80.777	-0.0711574	2.43243
ENSP00000359489-367-408	DomCDR	40.4878	-0.885366	67.9476	0.0941262	0
ENSP00000359489-813-869	DomCDR	55.8929	-1.26071	55.0596	-0.250168	0
ENSP00000359489-878-957	DomCDR	46.962	-1.31646	99.43	-0.0414537	0
ENSP00000359489-66-149	DomCDR	77.4699	-0.83012	44.9095	0.066281	0
ENSP00000359489-152-249	DomCDR	40.3093	-1.2268	76.0031	-0.0921153	0
ENSP00000359489-411-534	DomCDR	50	-1.02927	65.1823	-0.082796	0.483871
ENSP00000359489-539-735	DomCDR	59.6939	-1.14898	45.1132	-0.0994269	0
ENSP00000440504-155-189	NonDomCDR	42.9412	-1.41471	96.6571	-0.0602286	0
ENSP00000440504-286-344	NonDomCDR	73.9655	-0.534483	51.9441	0.0792542	0
ENSP00000440504-354-413	NonDomCDR	64.5763	-0.864407	76.2817	-0.0464533	0
ENSP00000304408-95-149	DomCDR	21.6667	-1.19444	51.2527	-0.103544	0
ENSP00000289749-166-216	NonDomCDR	23.4	-1.534	53.5588	-0.159294	0
ENSP00000356919-104-193	NonDomCDR	68.9888	-0.930337	58.8133	-0.0412089	0
ENSP00000376055-83-121	NonDomCDR	43.6842	-1.67368	68.0231	-0.282664	0
ENSP00000402000-444-474	NonDomCDR	52	-1.30333	51.5	-0.162806	0
ENSP00000402000-63-114	NonDomCDR	38.4314	-1.33333	89.9885	-0.0323846	0
ENSP00000388940-661-706	NonDomCDR	56.4444	-0.871111	64.3435	-0.0160609	1.95652
ENSP00000388940-167-226	NonDomCDR	49.661	-0.711864	80.4267	0.057975	0.5
ENSP00000388940-349-408	NonDomCDR	44.5763	-1.10508	69.5867	0.038175	4.5
ENSP00000388940-28-109	NonDomCDR	33.7037	-0.933333	65.828	0.0737963	0
ENSP00000388940-260-345	NonDomCDR	56.3529	-0.534118	54.9558	0.130637	3.13953
ENSP00000388940-422-617	NonDomCDR	64.4615	-1.08205	55.4393	-0.0169071	3.06122
ENSP00000452765-1062-1095	NonDomCDR	44.2424	-1.10303	88.0147	-0.0553324	0
ENSP00000355870-446-488	NonDomCDR	65.4762	0.0285714	71.7256	0.055393	0.697674
ENSP00000355870-110-175	NonDomCDR	43.6923	-1.40769	96.2318	-0.0691455	0
ENSP00000355870-331-441	NonDomCDR	34.8182	-1.07273	68.3081	-0.11928	0.810811
ENSP00000355260-1-74	NonDomCDR	38.9041	-0.590411	80.1216	-0.00456081	3.24324
ENSP00000389862-285-330	DomCDR	43.5556	-1.51333	80.5022	-0.166478	0
ENSP00000389862-179-232	DomCDR	49.8113	-1.83019	69.4241	-0.209876	0
ENSP00000389862-100-170	NonDomCDR	23.7143	-2.39714	109.115	-0.412523	6.33803
ENSP00000219782-119-148	NonDomCDR	64.4828	-0.172414	88.17	-0.0652667	0
ENSP00000366118-103-169	NonDomCDR	57.7273	-1.45909	56.2239	-0.146239	0.447761
ENSP00000386786-365-607	NonDomCDR	41.9008	-1.61653	65.5914	-0.152072	0
ENSP00000291582-347-401	NonDomCDR	65	-0.875926	78.0618	-0.0495836	0
ENSP00000291582-234-291	NonDomCDR	58.4211	-0.72807	57.1345	-0.0978397	0
ENSP00000291582-101-200	NonDomCDR	64.2424	-0.780808	59.162	-0.08795	0.6
ENSP00000313377-34-85	NonDomCDR	55.4902	-0.890196	82.0154	0.0688462	0
ENSP00000313377-125-202	NonDomCDR	48.3117	-0.933766	68.1551	-0.0134295	4.61538
ENSP00000489535-279-310	NonDomCDR	78.7097	-1.24194	62.3687	-0.111153	19.6875
ENSP00000489535-784-863	NonDomCDR	49.2405	-1.62025	98.75	-0.141281	1.5
ENSP00000489535-1-275	NonDomCDR	42.7372	-1.57007	67.0255	-0.252737	1.41818
ENSP00000389714-633-669	DomCDR	65	-1.28056	57.127	-0.130086	0.810811
ENSP00000354487-305-336	NonDomCDR	53.5484	-1.03871	97.8094	-0.0224469	15.9375
ENSP00000354487-546-590	NonDomCDR	60	-0.995455	92.2978	-0.0992489	1.33333
ENSP00000354487-855-899	NonDomCDR	37.5	-1.88409	56.9711	-0.247884	0
ENSP00000354487-636-746	NonDomCDR	59.3636	-0.970909	100.698	-0.0312432	5.94595
ENSP00000354487-980-1125	NonDomCDR	32.3448	-1.91862	99.7096	-0.314689	0
ENSP00000354487-1-164	NonDomCDR	44.2945	-1.37975	61.1287	-0.154323	0
ENSP00000404029-665-710	NonDomCDR	34.6667	-0.851111	98.9804	0.0700196	9.78261
ENSP00000463159-299-329	NonDomCDR	65.6667	-0.16	57.4613	-0.0497742	0.967742
ENSP00000463159-139-175	NonDomCDR	51.3889	-0.919444	66.7405	0.070127	0.810811
ENSP00000463159-205-281	NonDomCDR	56.5789	-0.852632	21.0299	-0.0395987	0.779221
ENSP00000300659-282-317	NonDomCDR	52.8571	-0.58	77.2583	0.138289	2.5
ENSP00000300659-1034-1075	NonDomCDR	92.6829	-0.429268	84.5357	0.0653095	1.42857
ENSP00000300659-196-273	NonDomCDR	39.3506	-0.876623	93.75	0.0601744	11.1538
ENSP00000300659-877-987	NonDomCDR	42.7273	-0.704545	98.8378	0.0901847	0
ENSP00000404464-348-406	NonDomCDR	43.7931	-1.23448	76.6559	0.0067339	0
ENSP00000404464-242-341	DomCDR	32.5253	-0.824242	58.003	-0.009832	0
ENSP00000318165-508-548	NonDomCDR	63	-1.5775	101.122	-0.215944	0
ENSP00000318165-283-357	NonDomCDR	37.027	-1.1473	77.6147	-0.168181	0
ENSP00000318165-369-494	NonDomCDR	64	-1.5888	64.2405	-0.242092	0
ENSP00000411113-43-105	NonDomCDR	61.6129	-0.853226	98.4	-0.013181	0
ENSP00000411113-110-190	NonDomCDR	53.625	-0.74875	92.0309	0.125742	0
ENSP00000306285-1-30	NonDomCDR	67.5862	-0.344828	38.04	0.00926	26
ENSP00000308873-294-327	DomCDR	62.1212	-1.02424	53.7971	-0.04125	0
ENSP00000308873-128-267	NonDomCDR	55.6115	-0.888489	62.0886	-0.0568343	0
ENSP00000463069-640-679	NonDomCDR	35.1282	-1.40769	101.957	-0.04529	0
ENSP00000463069-427-476	NonDomCDR	32.0408	-0.818367	106.786	0.0598	0
ENSP00000463069-367-420	NonDomCDR	35.283	-1.22075	53.3056	0.0263981	0
ENSP00000463069-509-636	NonDomCDR	42.126	-1.17165	79.9625	0.0189648	0
ENSP00000291823-574-616	NonDomCDR	46.4286	-1.13571	56.0465	0.0483953	0
ENSP00000291823-486-570	NonDomCDR	52.381	-1.05595	61.4624	-0.0354529	0
ENSP00000346065-1902-1932	NonDomCDR	94.3333	-0.776667	55.5516	-0.0984419	0
ENSP00000476774-297-329	NonDomCDR	45.9375	-1.15938	38.8758	-0.020797	0
ENSP00000476774-1-263	NonDomCDR	47.4046	-0.968321	76.0042	-0.118489	0
ENSP00000456226-1-260	NonDomCDR	47.9537	-0.961776	77.3823	-0.117989	0
ENSP00000262105-1-129	NonDomCDR	49.5312	-0.909375	108.037	0.0327194	4.4186
ENSP00000488772-1-91	NonDomCDR	41.1111	-1.51111	82.4846	-0.128586	0
ENSP00000265165-152-202	DomCDR	54.6	-0.738	78.7627	0.130929	8.23529
ENSP00000265165-230-302	NonDomCDR	50	-1.19583	55.8973	-0.0203685	0
ENSP00000265165-1-105	DomCDR	53.5577	-1.07596	49.0476	-0.108459	0
ENSP00000478513-1-35	DomCDR	31.7647	-1.84118	38.9771	-0.152591	0
ENSP00000368266-314-346	NonDomCDR	30.9375	-0.7375	60.5848	0.104039	0
ENSP00000368266-1-108	DomCDR	37.5701	-1.25888	77.7222	-0.113984	0
ENSP00000368264-300-347	NonDomCDR	33.4043	-1.31064	124.021	0.0664292	0
ENSP00000368264-1-105	DomCDR	41.5385	-0.931731	71.7057	-0.109483	0
ENSP00000262320-245-275	NonDomCDR	58.6667	-1.42667	56.0968	-0.170597	0
ENSP00000262320-392-450	NonDomCDR	57.2414	-1.28276	79.1017	-0.0692322	0
ENSP00000262320-308-382	NonDomCDR	73.7838	-0.839189	56.3547	0.0492827	0
ENSP00000345824-753-790	NonDomCDR	44.8649	-1.16757	130.024	-0.125218	0
ENSP00000345824-1820-1857	NonDomCDR	52.7027	-1.26757	83.2816	-0.0148789	0
ENSP00000345824-1723-1764	NonDomCDR	42.9268	-1.06829	60.6357	-0.116117	0
ENSP00000345824-285-333	DomCDR	71.4583	-0.627083	78.5408	-0.067551	0
ENSP00000345824-564-647	NonDomCDR	61.2048	-0.751807	84.2976	-0.0522893	0
ENSP00000345824-1-107	NonDomCDR	48.9623	-0.84717	81.9206	-0.0417897	0
ENSP00000345824-1500-1618	NonDomCDR	38.9831	-1.24576	67.3647	-0.092942	0
ENSP00000345824-1327-1479	NonDomCDR	45.5921	-1.22171	101.667	-0.064402	0
ENSP00000345824-1081-1318	NonDomCDR	50.8439	-0.915612	78.3525	-0.080705	0
ENSP00000372154-370-417	NonDomCDR	33.4043	-1.2	24.0229	0.0446854	0
ENSP00000483221-67-99	NonDomCDR	39.6875	-1.36875	72.1485	-0.0613091	0
ENSP00000483221-1-45	NonDomCDR	60	-0.697727	63.2	0.0531689	0
ENSP00000474667-27-81	DomCDR	101.111	-0.603704	82.3255	-0.00648727	5.45455
ENSP00000474667-228-363	NonDomCDR	72.963	-0.54963	73.5919	0.0859324	0.220588
ENSP00000372484-370-419	NonDomCDR	32.0408	-1.16531	29.982	0.06605	0
ENSP00000406367-1094-1125	NonDomCDR	50.6452	-0.441935	95.9906	-0.0221438	0.9375
ENSP00000406367-565-597	NonDomCDR	24.375	-1.40625	99.5091	-0.0925364	0
ENSP00000406367-1147-1204	NonDomCDR	44.9123	-1.18772	33.731	-0.104534	0
ENSP00000406367-1207-1316	NonDomCDR	64.6789	-0.704587	63.6218	-0.00754454	0
ENSP00000330264-742-814	NonDomCDR	47.6389	-0.447222	52.0151	0.0811589	0
ENSP00000346729-107-153	NonDomCDR	36.087	-1.53261	43.5511	-0.11496	0
ENSP00000364986-11-51	NonDomCDR	39.25	-1.005	84.0951	-0.0126659	0
ENSP00000327054-399-434	NonDomCDR	66.8571	-0.637143	88.7611	0.0849889	3.33333
ENSP00000327054-575-610	NonDomCDR	30.5714	-1.80286	68.8472	-0.230333	0
ENSP00000327054-1-49	NonDomCDR	45	-1.2	128.984	-0.0325816	4.89796
ENSP00000396271-305-354	DomCDR	32.0408	-1.07143	75.508	-0.18531	0
ENSP00000396271-136-273	NonDomCDR	47.7372	-0.689051	76.4558	-0.0366514	5.43478
ENSP00000304676-23-239	NonDomCDR	62.037	-0.771759	86.8194	-0.0110207	0
ENSP00000335325-393-424	DomCDR	43.871	-1.59677	59.6562	-0.114941	0
ENSP00000335325-974-1005	DomCDR	34.8387	-1.29032	60.2687	-0.0875438	0
ENSP00000335325-306-338	DomCDR	79.0625	-1.82812	28.4576	-0.234461	0
ENSP00000335325-1012-1046	DomCDR	83.2353	-0.829412	42.1514	-0.00576	0
ENSP00000311766-147-196	DomCDR	65.7143	-1.60408	85.516	-0.116526	0
ENSP00000285873-1391-1420	NonDomCDR	43.7931	-1.23448	64.6933	-0.123417	1
ENSP00000285873-1313-1348	NonDomCDR	47.4286	-1.69143	102.864	-0.178078	4.16667
ENSP00000285873-716-795	NonDomCDR	53.038	-1.56709	60.76	-0.250046	3.375
ENSP00000220659-315-347	NonDomCDR	45.625	-1.25625	21.3515	-0.158891	0
ENSP00000220659-372-419	NonDomCDR	66.383	-0.823404	72.9833	0.0099375	0.625
ENSP00000431284-15-57	NonDomCDR	76.6667	-1.30952	68.193	-0.0597488	4.18605
ENSP00000453302-772-824	DomCDR	69.6154	-0.303846	36.2208	-0.0861585	0
ENSP00000385461-373-405	NonDomCDR	33.4375	-2.11563	91.8242	-0.304036	0
ENSP00000385461-64-105	NonDomCDR	33.4146	-1.18293	67.7333	0.0186119	0
ENSP00000262726-1268-1302	NonDomCDR	60.2941	-0.641176	74.2771	0.0642857	0
ENSP00000352420-170-213	NonDomCDR	63.4884	-1.12326	71.9182	0.0119068	0
ENSP00000352420-229-306	NonDomCDR	46.8831	-0.897403	34.3231	0.0673423	0
ENSP00000382382-879-1024	NonDomCDR	47.7931	-1.39034	67.0959	-0.10846	0
ENSP00000456830-98-338	NonDomCDR	52.5	-0.675833	63.7178	-0.00750996	0
ENSP00000297788-5-42	NonDomCDR	65.6757	-1.44595	146.453	-0.288037	0
ENSP00000297788-971-1012	NonDomCDR	45.122	-1.34146	26.9381	-0.19105	0
ENSP00000297788-261-311	DomCDR	52.8	-1.234	94.5569	0.0211863	0
ENSP00000297788-1030-1135	NonDomCDR	44.6667	-1.80571	107.692	-0.351221	0
ENSP00000348602-331-389	NonDomCDR	68.7931	-0.512069	54.1407	0.0429034	1.01695
ENSP00000348602-239-317	NonDomCDR	53.9744	-0.861538	109.415	-0.0585165	14.4304
ENSP00000348602-391-622	DomCDR	67.7922	-0.488745	57.2336	-0.0653578	0.646552
ENSP00000484807-622-652	DomCDR	29.3333	-1.25	84.471	-0.0648097	0
ENSP00000484807-1041-1162	NonDomCDR	61.157	-1.12479	78.5918	-0.0304361	0
ENSP00000455911-1-307	NonDomCDR	44.3791	-1.57778	101.466	-0.197126	0
ENSP00000284694-107-136	NonDomCDR	47.2414	-1.33448	73.5767	-0.141503	0
ENSP00000284694-528-568	NonDomCDR	22.25	-1.31	117.398	-0.15798	0
ENSP00000339030-1-307	NonDomCDR	44.3791	-1.57778	101.466	-0.197126	0.29316
ENSP00000468376-109-139	NonDomCDR	16.3333	-1.09333	27.7129	-0.0878161	0
ENSP00000309968-737-824	NonDomCDR	46.092	-1.11954	66.7591	-0.0741284	3.06818
ENSP00000421322-181-214	NonDomCDR	70.9091	-1.09697	96.1676	0.0654324	0
ENSP00000421322-292-325	NonDomCDR	67.8788	-0.748485	70.1059	-0.0618176	0
ENSP00000421322-106-144	NonDomCDR	36.0526	-2.17368	67.8974	-0.184754	0
ENSP00000421322-239-284	NonDomCDR	52	-1.78667	90.613	-0.0482239	0
ENSP00000421322-12-73	NonDomCDR	51.3115	-0.972131	79.9452	0.0193161	0
ENSP00000360060-1-31	DomCDR	45.6667	-1.56	173.006	-0.199684	1.93548
ENSP00000360060-175-206	DomCDR	60	-1.56452	93.4281	-0.0697781	1.875
ENSP00000360060-139-173	DomCDR	77.6471	-0.491176	70.3629	0.0347029	0
ENSP00000360060-223-279	NonDomCDR	81.9643	-0.566071	86.4825	0.0605281	0
ENSP00000360060-44-102	DomCDR	99.6552	0.172414	77.4458	0.0683322	0
ENSP00000411825-842-873	NonDomCDR	3.22581	-1.8	154.425	0.0112281	0
ENSP00000411825-710-813	NonDomCDR	44.8544	-0.698058	104.956	-0.0108827	4.32692
ENSP00000356480-124-218	NonDomCDR	58.2979	-1.26702	49.7358	-0.0888474	2.21053
ENSP00000255006-331-491	NonDomCDR	48.3125	-0.94	72.923	-0.0241826	0
ENSP00000411932-32-62	DomCDR	87.6667	-1.23667	60.9806	-0.114345	0
ENSP00000411932-342-543	NonDomCDR	58.1592	-1.24975	96.6431	-0.0832114	0
ENSP00000389716-145-180	NonDomCDR	50.2857	-1.23143	77.3083	-0.0792944	0
ENSP00000389716-107-143	NonDomCDR	84.1667	-1.61389	86.3622	-0.144311	0
ENSP00000389716-26-69	NonDomCDR	40.9302	-1.67442	116.866	-0.0791932	0
ENSP00000477526-1-122	NonDomCDR	48.5124	-0.817355	83.5541	0.0462115	0
ENSP00000322804-329-362	NonDomCDR	41.5152	-0.872727	110.232	0.0703235	0
ENSP00000322804-259-309	NonDomCDR	19.4	-1.256	106.259	0.126024	1.17647
ENSP00000322804-421-484	NonDomCDR	42.0635	-1.14444	75.9469	-0.102766	0
ENSP00000378418-408-447	NonDomCDR	52.5641	-1.32051	62.5725	-0.140665	0
ENSP00000356925-395-426	NonDomCDR	50.3226	-0.783871	53.175	0.0189656	0
ENSP00000356925-332-371	NonDomCDR	55.3846	-0.325641	65.2075	0.01843	0
ENSP00000385725-87-121	NonDomCDR	54.7059	-1.16765	53.7257	-0.0533829	0
ENSP00000385725-1-56	NonDomCDR	49.6364	-1.54909	69.5911	-0.177441	1.60714
ENSP00000267377-1-49	NonDomCDR	10.4167	-0.908333	89.4959	-0.041849	0
ENSP00000239587-474-522	NonDomCDR	52.9167	-0.991667	81.5327	-0.0094	0
ENSP00000239587-1-78	NonDomCDR	63.5065	-0.836364	62.4449	0.00162949	0
ENSP00000406478-489-518	NonDomCDR	44.1379	-0.968966	73.6333	-0.06242	3
ENSP00000406478-521-552	NonDomCDR	66.4516	-0.816129	72.1094	-0.184116	0
ENSP00000406478-556-589	NonDomCDR	74.2424	-0.872727	112.824	0.00369706	0
ENSP00000406478-417-455	NonDomCDR	51.3158	-0.665789	62.0103	-0.0244615	0
ENSP00000369979-85-123	NonDomCDR	84.7368	-0.181579	41.6769	0.0506179	0
ENSP00000369979-22-64	NonDomCDR	60.4762	-0.633333	56.4744	-0.00211395	0
ENSP00000281924-1-53	NonDomCDR	52.6923	-0.969231	116.132	-0.0433358	0
ENSP00000360058-1-32	DomCDR	53.5484	-1.37419	157.725	-0.168422	0
ENSP00000360058-44-102	DomCDR	97.931	0.153448	80.3119	0.0509492	0
ENSP00000265000-33-67	NonDomCDR	34.4118	-1.64412	41.6514	-0.112503	1.71429
ENSP00000358983-337-367	NonDomCDR	23	-0.763333	85.9097	0.0271258	0
ENSP00000358983-697-734	NonDomCDR	31.6216	-1.46216	88.5263	-0.0982868	3.94737
ENSP00000358983-402-440	NonDomCDR	36.3158	-0.773684	90.2077	-0.0604231	3.07692
ENSP00000358983-840-900	NonDomCDR	63.3333	-1.04833	71.9705	-0.0874279	8.85246
ENSP00000311513-848-888	NonDomCDR	29.5	-1.6825	108.388	-0.215471	1.46341
ENSP00000311513-595-640	NonDomCDR	65.1111	-0.962222	79.4587	-0.0952826	6.52174
ENSP00000311513-318-381	NonDomCDR	54.127	-1.39524	55.3813	-0.222606	0
ENSP00000311513-214-283	NonDomCDR	32.4638	-2.12029	102.467	-0.352656	1.28571
ENSP00000311513-435-584	NonDomCDR	58.255	-1.0302	70.326	-0.0964673	2
ENSP00000311513-645-845	NonDomCDR	56.45	-1.3915	59.9149	-0.216962	0.895522
ENSP00000311513-1033-1431	NonDomCDR	44.6231	-1.67085	95.403	-0.174502	3.83459
ENSP00000354130-434-463	NonDomCDR	53.7931	-0.77931	82.9933	0.132747	1
ENSP00000354130-337-377	NonDomCDR	48.75	-0.7725	65.1902	-0.0661732	0
ENSP00000354130-1-69	DomCDR	53.0882	-0.914706	75.4884	-0.134168	3.04348
ENSP00000383234-500-536	NonDomCDR	32.7778	-1.23611	105.819	-0.133397	0
ENSP00000383234-371-413	NonDomCDR	48.8095	-1.34286	49.7884	-0.0752256	0
ENSP00000394849-369-399	NonDomCDR	32.6667	-1.11667	80.5774	0.0431194	0
ENSP00000404079-1-57	NonDomCDR	40.3571	-1.20714	111.556	0.0141772	0
ENSP00000422482-787-839	NonDomCDR	15	-1.81538	39.7208	-0.277374	0
ENSP00000422482-501-569	DomCDR	31.6176	-1.73824	39.8899	-0.217816	0.869565
ENSP00000262301-1-39	NonDomCDR	23.4211	-1.29474	122.592	-0.082159	0
ENSP00000249079-122-160	DomCDR	43.9474	-1.65526	93.2564	-0.213938	0
ENSP00000297689-187-217	DomCDR	64.6667	-0.726667	85.5548	0.0536806	0
ENSP00000297689-255-307	DomCDR	57.8846	-1.16923	75.6943	-0.055717	4.5283
ENSP00000364265-1-51	NonDomCDR	47	-1.02	75.0725	-0.111237	0.588235
ENSP00000447908-181-317	DomCDR	69.7794	-0.660294	59.8905	0.0168277	0
ENSP00000364260-251-317	NonDomCDR	53.3333	-0.801515	61.6657	-0.0385657	0
ENSP00000364260-171-245	NonDomCDR	34.3243	-1.56351	64.6547	-0.079288	0
ENSP00000385722-1303-1335	NonDomCDR	55	-0.990625	91.497	-0.0262061	4.54545
ENSP00000385722-1-35	NonDomCDR	46.1765	-0.814706	43.8829	-0.0337571	13.7143
ENSP00000464275-50-80	DomCDR	32.6667	-1.24	40.7839	-0.107142	2.90323
ENSP00000464275-1-32	NonDomCDR	53.5484	-1.37097	110.156	-0.15265	0.9375
ENSP00000285021-86-141	NonDomCDR	58.5455	-1.54364	66.1268	-0.22038	0
ENSP00000285021-867-934	NonDomCDR	47.0149	-1.3	54.5118	-0.240835	7.5
ENSP00000285021-1-82	NonDomCDR	39.8765	-1.51358	61.6122	-0.262748	12.0732
ENSP00000285021-326-520	NonDomCDR	20.7732	-1.65619	64.5933	-0.231739	2.46154
ENSP00000337386-273-325	NonDomCDR	30	-1	122.964	0.0955868	0.566038
ENSP00000216237-670-705	NonDomCDR	94.5714	-0.674286	78.4944	-0.0874694	9.16667
ENSP00000216237-44-85	NonDomCDR	61.9512	-0.963415	73.6024	-0.0194333	12.8571
ENSP00000216237-624-668	NonDomCDR	53.1818	-1.57045	65.2822	-0.207302	1.33333
ENSP00000353013-288-322	NonDomCDR	45.8824	-0.847059	74.8829	0.0354	0
ENSP00000351318-1-32	NonDomCDR	25.1613	-0.793548	58.2594	0.128625	10.3125
ENSP00000351318-534-566	NonDomCDR	36.5625	-1.4625	112.048	0.00940606	0
ENSP00000351318-672-708	NonDomCDR	40.8333	-1.2	66.8865	-0.114576	0
ENSP00000351318-62-102	NonDomCDR	36.75	-1.47	48.5976	-0.0995122	0
ENSP00000351318-454-522	NonDomCDR	47.3529	-1.16324	96.8899	-0.0282014	0
ENSP00000351318-570-653	NonDomCDR	38.7952	-1.04699	75.0155	0.0417988	0.357143
ENSP00000455229-440-470	NonDomCDR	49	-1.76333	90.7871	-0.215977	2.90323
ENSP00000313243-155-194	NonDomCDR	70.2564	-0.451282	72.895	0.0725425	0
ENSP00000313243-532-577	NonDomCDR	50	-1.05111	53.5652	0.00355	0
ENSP00000295718-289-334	NonDomCDR	43.5556	-1.32667	73.1609	-0.162552	0
ENSP00000295718-639-685	NonDomCDR	34.1304	-0.836957	81.4383	0.0178021	0
ENSP00000295718-360-472	NonDomCDR	74.0179	-0.479464	72.9177	-0.00498673	0.265487
ENSP00000347792-1429-1479	NonDomCDR	68.4	-0.764	49.1922	-0.0204961	0
ENSP00000347792-1355-1407	NonDomCDR	54.6154	-0.436538	64.1472	0.0433472	0
ENSP00000347792-1019-1076	NonDomCDR	68.4211	-0.887719	47.6483	-0.106167	0
ENSP00000347792-1079-1350	NonDomCDR	64.9077	-0.75941	70.0695	-0.0238779	0.551471
ENSP00000364893-732-769	NonDomCDR	73.7838	-0.975676	84.7342	0.0556526	3.15789
ENSP00000364893-568-644	NonDomCDR	58.9474	-0.878947	33.3883	0.0363597	0.779221
ENSP00000325285-703-761	NonDomCDR	68.9655	-0.894828	41.6525	-0.0999881	0
ENSP00000325285-620-691	NonDomCDR	57.4648	-0.883099	56.0486	0.0213319	0.416667
ENSP00000325285-817-889	NonDomCDR	70.4167	-0.8125	48.6493	0.0242534	0
ENSP00000364860-843-943	NonDomCDR	54.7	-0.748	53.4386	-0.0393139	0.891089
ENSP00000469648-120-195	NonDomCDR	48.1333	-0.856	88.9066	-0.0129842	0
ENSP00000324827-277-315	NonDomCDR	46.3158	-2.78158	103.172	-0.43991	0
ENSP00000324827-481-521	NonDomCDR	54	-0.6725	59.9	-0.122329	0
ENSP00000324827-540-695	NonDomCDR	18.3226	-2.28516	123.876	-0.144449	1.15385
ENSP00000346725-445-540	NonDomCDR	49.4737	-1.64316	83.5135	-0.275849	1.25
ENSP00000441802-914-953	DomCDR	30	-1.94615	31.2825	-0.323915	0
ENSP00000441802-962-1033	DomCDR	54.9296	-0.926761	77.5236	0.013475	0
ENSP00000441802-175-267	DomCDR	52.0652	-0.813043	64.2581	-0.0748398	0.645161
ENSP00000435509-69-111	NonDomCDR	51.1905	-0.8	97.0907	0.0221837	0
ENSP00000310448-724-758	DomCDR	51.7647	-1.41176	40.6229	-0.131603	0
ENSP00000310448-566-612	DomCDR	53.0435	-1.2587	67.2404	-0.0729915	5.74468
ENSP00000310448-420-498	DomCDR	62.4359	-1.25256	84.5127	-0.136391	6.07595
ENSP00000354089-363-403	NonDomCDR	39.25	-1.6875	48.8293	-0.221705	0.731707
ENSP00000354089-154-220	NonDomCDR	44.3939	-0.840909	70.1716	0.0589478	2.68657
ENSP00000354089-1-138	NonDomCDR	42.1168	-1.00438	60.2065	-0.0242594	0
ENSP00000269518-1-31	DomCDR	26.6667	-1.15667	67.0871	-0.188623	2.90323
ENSP00000440655-1049-1082	DomCDR	59.3939	-1.26667	51.6088	-0.0964941	0
ENSP00000440655-204-263	NonDomCDR	43.0508	-1.77797	96.94	-0.241057	0
ENSP00000440655-512-603	NonDomCDR	55.7143	-1.38242	32.1913	-0.15481	0
ENSP00000440655-412-510	NonDomCDR	52.6531	-1.24388	37.1747	-0.0592293	0
ENSP00000440655-60-202	NonDomCDR	65.8451	-1.10352	47.9566	-0.0748378	0
ENSP00000467414-281-311	NonDomCDR	13.3333	-1.6	46.8581	-0.170652	0
ENSP00000467414-473-594	NonDomCDR	59.7521	-0.930579	105.305	-0.0322213	0.737705
ENSP00000362946-184-215	NonDomCDR	31.6129	-1.2	72.7562	-0.0887719	0.9375
ENSP00000481160-1-90	DomCDR	28.8764	-1.73933	35.0467	-0.432852	5
ENSP00000353717-1049-1082	DomCDR	59.3939	-1.26667	51.6088	-0.0964941	0
ENSP00000353717-204-263	NonDomCDR	43.0508	-1.77797	96.94	-0.241057	0
ENSP00000353717-512-603	NonDomCDR	55.7143	-1.38242	32.1913	-0.15481	0
ENSP00000353717-412-510	NonDomCDR	52.6531	-1.24388	37.1747	-0.0592293	0
ENSP00000353717-60-202	NonDomCDR	65.8451	-1.10352	47.9566	-0.0748378	0
ENSP00000478668-563-630	NonDomCDR	62.6866	-1.04328	75.9044	-0.152804	7.5
ENSP00000360141-622-671	NonDomCDR	61.8367	-1.71633	98.878	-0.266392	0
ENSP00000360141-175-250	NonDomCDR	67.7333	-0.465333	85.6382	-0.00743158	0
ENSP00000360141-5-170	NonDomCDR	44.5455	-0.652121	80.3114	0.0148241	0
ENSP00000360141-268-608	NonDomCDR	47.8235	-0.695588	71.368	-0.067346	0.791789
ENSP00000465039-295-333	NonDomCDR	77.1053	-0.928947	96.5026	-0.0298462	0
ENSP00000465039-338-479	NonDomCDR	45.6738	-1.19929	81.3585	-0.0547282	6.33803
ENSP00000215730-75-105	DomCDR	87.6667	-0.81	56.4871	-0.0491	0
ENSP00000215730-2-53	NonDomCDR	42.3529	-1.55294	65.8	-0.10895	1.15385
ENSP00000215730-123-202	NonDomCDR	50.7595	-1.27722	32.4987	-0.0883213	2.25
ENSP00000474215-140-198	NonDomCDR	35.3448	-1.81724	68.9475	-0.267741	1.52542
ENSP00000264157-298-340	NonDomCDR	58.0952	-0.37381	66.8698	0.130647	0
ENSP00000264157-374-447	NonDomCDR	58.7671	-1.1726	42.3554	-0.00130135	0
ENSP00000264157-453-679	NonDomCDR	47.8761	-1.11195	76.4846	-0.0246198	3.03965
ENSP00000359958-125-330	NonDomCDR	16.1951	-2.12585	151.678	-0.175962	7.57282
ENSP00000344544-348-406	NonDomCDR	42.069	-1.65345	70.6712	-0.0938576	0
ENSP00000344544-1-90	NonDomCDR	53.7079	-1.16629	44.2978	-0.105266	2
ENSP00000299162-301-330	NonDomCDR	67.2414	-1.23103	84.57	-0.105563	0
ENSP00000299162-362-399	NonDomCDR	76.7568	-0.640541	96.3026	0.0358553	0
ENSP00000299162-59-152	NonDomCDR	66.129	-0.250538	61.7904	0.126512	0
ENSP00000282928-378-435	NonDomCDR	35.9649	-0.891228	81.519	0.0366103	0
ENSP00000479342-279-334	NonDomCDR	67.2727	-0.752727	63.8875	-0.0526054	0
ENSP00000479342-36-124	NonDomCDR	37.7273	-0.886364	44.7899	-0.0541472	0
ENSP00000017003-41-88	NonDomCDR	14.6809	-2.09574	60.1708	-0.219883	0
ENSP00000017003-100-162	NonDomCDR	42.7419	-0.733871	56.254	-0.0316508	0
ENSP00000267807-84-115	DomCDR	31.6129	-0.980645	76.6437	0.0729656	0
ENSP00000267807-893-924	NonDomCDR	81.6129	-0.851613	80.975	0.0429875	0.9375
ENSP00000267807-165-210	DomCDR	56.2222	-0.6	72.9717	0.000176087	2.6087
ENSP00000267807-926-979	NonDomCDR	64.3396	-1.0566	42.85	-0.140448	0
ENSP00000267807-739-794	NonDomCDR	32.1818	-1.53273	55.2482	-0.247632	0
ENSP00000267807-495-608	NonDomCDR	52.7434	-1.04071	37.7921	-0.0847096	1.84211
ENSP00000433488-99-130	NonDomCDR	34.5161	-1.30323	53.4562	0.01765	0
ENSP00000433488-29-65	NonDomCDR	65	-1.01389	58.2757	-0.000981081	2.43243
ENSP00000433488-233-272	NonDomCDR	52.5641	-1.18718	66.945	-0.0181275	0
ENSP00000378690-1-41	NonDomCDR	24.5	-1.59	60.761	-0.228024	0
ENSP00000480068-1-78	NonDomCDR	62.0779	-1.01688	87.7615	0.0267423	3.84615
ENSP00000356476-1-83	NonDomCDR	78.9024	-0.30122	96.653	-0.0366277	3.25301
ENSP00000468927-339-397	NonDomCDR	68.9655	-0.57931	33.6288	-0.0295458	0
ENSP00000468927-265-325	NonDomCDR	60.1667	-0.721667	64.6656	-0.0270852	6.39344
ENSP00000225235-355-388	NonDomCDR	38.4848	-1.70303	74.8676	-0.0966853	0
ENSP00000225235-1-76	NonDomCDR	66.4	-0.736	75.9263	-0.0821711	2.36842
ENSP00000225235-85-196	NonDomCDR	51.2613	-0.884685	65.9384	-0.00903571	0
ENSP00000225235-202-316	NonDomCDR	43.0702	-0.742982	78.4478	-0.0245357	0.782609
ENSP00000417401-953-985	NonDomCDR	52.1875	-0.89375	69.8061	-0.0491212	0
ENSP00000417401-992-1030	NonDomCDR	75	0.0210526	47.7256	-0.0257692	0
ENSP00000327763-612-655	NonDomCDR	29.5349	-1.65814	32.5795	-0.258823	1.36364
ENSP00000470082-109-195	NonDomCDR	13.7209	-1.80116	156.041	-0.0874805	0
ENSP00000387875-1006-1035	NonDomCDR	77.2414	-0.789655	48.3633	0.0123733	0
ENSP00000387875-710-740	DomCDR	58.6667	-1.76333	51.2065	-0.286703	0
ENSP00000387875-1046-1077	NonDomCDR	21.9355	-1.97419	23.5125	-0.261044	0
ENSP00000387875-1184-1215	NonDomCDR	25.4839	-1.6871	99.5781	-0.263544	0
ENSP00000377601-1-45	NonDomCDR	75.6818	-0.393182	79.1978	-0.0269644	2
ENSP00000377601-88-137	NonDomCDR	45.7143	-2.18571	46.396	-0.38391	0
ENSP00000437554-1125-1164	NonDomCDR	34.8718	-0.841026	82.18	0.069055	0
ENSP00000437554-437-486	NonDomCDR	54.2857	-0.42449	41.404	-0.015302	0
ENSP00000437554-223-280	NonDomCDR	60.5263	-0.603509	82.381	-0.108547	0
ENSP00000437554-1002-1093	NonDomCDR	54.7253	-0.936264	81.7174	-0.0292609	0
ENSP00000437554-509-616	NonDomCDR	43.3645	-0.811215	61.5083	-0.179743	0
ENSP00000437554-25-168	NonDomCDR	65.8042	-0.976923	77.2681	-0.0411715	0
ENSP00000299752-336-367	DomCDR	66.129	-0.583871	53.7469	-0.00518437	0
ENSP00000345848-146-251	NonDomCDR	16.6667	-2.57714	100.993	-0.53141	1.41509
ENSP00000403557-71-126	NonDomCDR	14.1818	-1.67818	87.1643	-0.119218	0
ENSP00000321179-167-198	NonDomCDR	22.2581	-2.2129	60.8656	-0.220972	0
ENSP00000321179-1-39	NonDomCDR	64.2105	-0.844737	9.28718	-0.0569821	0
ENSP00000260803-472-544	NonDomCDR	65	-1.14583	31.411	-0.138577	4.93151
ENSP00000260803-388-466	NonDomCDR	45	-1.11923	57.1734	-0.0554316	0.379747
ENSP00000308733-331-419	NonDomCDR	49.7727	-1.22159	70.2989	-0.151704	0
ENSP00000492384-275-340	DomCDR	28.6154	-2.06308	42.0818	-0.235068	0
ENSP00000304051-601-664	NonDomCDR	48.0952	-1.32698	27.2172	-0.136883	5.15625
ENSP00000383044-760-794	NonDomCDR	65.8824	-1.24706	59.2629	-0.0837429	0
ENSP00000383044-468-505	NonDomCDR	65.9459	-0.567568	90.3789	0.0271579	0
ENSP00000240361-1145-1174	NonDomCDR	36.8966	-2.03793	110.49	-0.289993	0
ENSP00000240361-1094-1132	NonDomCDR	59.2105	-0.621053	63.5333	-0.00642051	0
ENSP00000240361-570-622	NonDomCDR	39.6154	-0.757692	76.3358	0.0414302	0
ENSP00000240361-803-909	NonDomCDR	41.5094	-0.980189	54.5383	0.0400972	0
ENSP00000240361-1299-1465	NonDomCDR	65.7831	-1.27831	88.5054	-0.125331	0
ENSP00000240361-911-1091	NonDomCDR	46.6111	-1.24	63.8807	-0.0529486	0
ENSP00000472118-135-238	DomCDR	43.8835	-0.534951	66.8212	0.0159433	0
ENSP00000384830-199-231	NonDomCDR	51.875	-0.70625	31.9848	0.0749152	0
ENSP00000384830-246-285	NonDomCDR	45.1282	-0.794872	74.6075	-0.077995	0
ENSP00000384830-897-944	NonDomCDR	54.2553	-1.63191	40.2792	-0.215221	0
ENSP00000384830-970-1024	NonDomCDR	47.2222	-1.13519	86.6527	-0.0842891	0
ENSP00000384830-20-101	NonDomCDR	52.963	-0.623457	109.688	0.0908366	0
ENSP00000384830-113-196	NonDomCDR	80	-0.407229	58.1214	0.071319	0
ENSP00000384830-288-409	NonDomCDR	54.876	-0.761983	67.1377	-0.0301508	0
ENSP00000384830-415-555	NonDomCDR	62.2857	-0.63	67.7617	-0.0198021	0
ENSP00000390394-1-45	NonDomCDR	59.7727	-0.856818	21.7	-0.0733044	14.6667
ENSP00000390394-63-111	NonDomCDR	22.2917	-2.45	114.749	-0.172384	0
ENSP00000390394-292-419	DomCDR	66.063	-0.817323	81.5383	-0.0258391	2.10938
ENSP00000375857-252-304	DomCDR	82.5	-0.511538	16.5642	0.00613962	1.69811
ENSP00000375857-313-365	NonDomCDR	61.9231	-0.928846	61.9019	-0.100219	0
ENSP00000375857-369-808	NonDomCDR	49.9772	-1.24442	51.9232	-0.164235	2.45455
ENSP00000368698-485-517	NonDomCDR	60.9375	-1.23438	76.497	-0.114561	1.81818
ENSP00000368698-1386-1422	NonDomCDR	78.3333	-0.219444	78.9216	0.142168	0.810811
ENSP00000368698-337-376	NonDomCDR	42.5641	-0.897436	120.317	0.0918975	0
ENSP00000368698-1730-1772	NonDomCDR	62.8571	-0.966667	69.2767	-0.062507	2.7907
ENSP00000368698-1869-1912	NonDomCDR	58.8372	-1.31628	100.318	-0.0985955	0.681818
ENSP00000368698-210-255	NonDomCDR	58.6667	-1.06667	72.95	-0.100457	0.652174
ENSP00000368698-1021-1066	NonDomCDR	52	-1.31333	87.013	-0.0818609	1.30435
ENSP00000368698-262-315	NonDomCDR	47.9245	-0.898113	38.0574	0.0935056	1.11111
ENSP00000368698-129-185	NonDomCDR	50.5357	-1.01786	103.828	0.00578421	2.63158
ENSP00000368698-1171-1228	NonDomCDR	80.3509	-0.917544	73.6276	0.0252121	0.517241
ENSP00000368698-1230-1291	NonDomCDR	76.7213	-1.25082	89.9048	-0.0993968	0.483871
ENSP00000368698-2248-2313	NonDomCDR	73.5385	-0.756923	67.3106	0.0714348	0
ENSP00000368698-884-960	NonDomCDR	57.8947	-0.807895	72.3195	-0.0113221	0
ENSP00000368698-2315-2400	NonDomCDR	60.9412	-0.611765	95.8291	0.0756523	0.348837
ENSP00000368698-2155-2243	NonDomCDR	42.0455	-1.44659	78.1517	-0.1245	0
ENSP00000368698-1069-1168	NonDomCDR	74.8485	-0.884848	64.345	0.050931	0.9
ENSP00000368698-1-126	NonDomCDR	71.04	-1.1016	52.2786	-0.129383	1.42857
ENSP00000368698-2560-2718	NonDomCDR	63.038	-0.81519	57.0057	-0.0477962	0.566038
ENSP00000368698-556-747	NonDomCDR	65.3403	-0.808377	63.8016	-0.00384896	0.625
ENSP00000384398-406-448	NonDomCDR	30.4762	-0.316667	45.4907	0.0279488	0
ENSP00000384398-487-530	NonDomCDR	63.7209	-0.444186	76.0659	0.0559205	2.04545
ENSP00000384398-1-153	NonDomCDR	56.25	-0.364474	73.5641	-0.0732856	0
ENSP00000446682-384-420	NonDomCDR	19.1667	-2.26944	121.173	-0.350084	0.810811
ENSP00000446682-182-228	DomCDR	46.5217	-0.806522	73.9277	0.0579085	0
ENSP00000349022-176-213	NonDomCDR	47.5676	-1.03243	68.35	-0.109055	0
ENSP00000349022-354-396	NonDomCDR	62.8571	-1.03333	64.0512	-0.14547	0
ENSP00000467679-1-34	NonDomCDR	47.8788	-0.263636	103.953	0.0366882	0
ENSP00000467679-403-446	NonDomCDR	36.5116	-1.32791	113.798	-0.0311159	0
ENSP00000467679-180-225	NonDomCDR	56.4444	-0.171111	129.439	0.135693	0
ENSP00000467679-227-273	NonDomCDR	34.1304	-0.41087	84.3851	0.0696745	0
ENSP00000339723-210-450	NonDomCDR	21.125	-2.24208	83.8963	-0.260626	0
ENSP00000428324-297-340	NonDomCDR	50	-1.50233	127.418	-0.0921136	0.681818
ENSP00000428324-1-47	NonDomCDR	31.9565	-1.10217	59.2255	-0.0858298	0.638298
ENSP00000375629-567-596	NonDomCDR	67.5862	-0.937931	120.113	-0.0203867	0
ENSP00000375629-492-525	NonDomCDR	35.7576	-1.08182	51.0029	-0.0238206	0
ENSP00000375629-417-455	NonDomCDR	48.6842	-0.528947	71.8872	0.0226103	0
ENSP00000342118-643-724	NonDomCDR	47.1605	-1.20864	54.5146	-0.12208	0
ENSP00000368683-167-209	NonDomCDR	32.381	-1.93095	77.7605	-0.0620698	0
ENSP00000478280-233-588	NonDomCDR	51.2958	-0.56338	84.4416	0.00246685	0.758427
ENSP00000312535-550-583	NonDomCDR	35.4545	-1.52424	95.9912	-0.0750588	0.882353
ENSP00000312535-374-410	NonDomCDR	49.1667	-0.691667	46.2108	-0.0975162	0
ENSP00000382004-23-74	NonDomCDR	70.7843	-1.00196	57.15	0.0195404	112.5
ENSP00000382004-90-171	NonDomCDR	70.7407	-0.492593	39.9476	0.0545549	0
ENSP00000382004-174-289	NonDomCDR	41.4783	-1.20609	46.356	0.0626931	43.4483
ENSP00000382004-850-968	NonDomCDR	60.2542	-1.26695	46.4681	-0.0545403	18.9076
ENSP00000387477-1940-1977	NonDomCDR	65.9459	-0.508108	102.374	0.0952947	0
ENSP00000387477-1992-2050	NonDomCDR	91.0345	0.037931	113.485	0.134686	2.0339
ENSP00000387477-2052-2157	NonDomCDR	45.5238	-1.18286	61.3811	-0.0151443	1.69811
ENSP00000305702-598-636	NonDomCDR	43.6842	-1.23158	46.4051	-0.103833	0
ENSP00000305702-653-724	NonDomCDR	49.8592	-0.840845	61.6681	-0.0978694	0
ENSP00000380679-1-280	NonDomCDR	48.2437	-0.969892	69.7307	-0.0785325	0
ENSP00000351159-233-588	NonDomCDR	51.2958	-0.56338	84.4416	0.00246685	0.758427
ENSP00000403453-756-796	DomCDR	51.25	-1.9625	115.632	-0.0538244	1.46341
ENSP00000403453-31-80	NonDomCDR	53.4694	-0.563265	66.39	0.03412	3
ENSP00000253329-362-416	NonDomCDR	37.963	-1.82778	60.2145	-0.178915	0.545455
ENSP00000253329-428-492	NonDomCDR	6.09375	-2.90625	87.5108	-0.316312	0.461538
ENSP00000280346-184-216	NonDomCDR	31.25	-0.421875	85.1152	-0.0229061	0
ENSP00000280346-309-350	NonDomCDR	61.9512	-0.273171	82.8762	0.00240714	0.714286
ENSP00000231484-1153-1184	NonDomCDR	28.3871	-0.883871	45.775	-0.0638469	0
ENSP00000231484-1071-1106	NonDomCDR	58.8571	-0.585714	59.6583	-0.0192444	0
ENSP00000231484-946-1028	NonDomCDR	66.5854	-1.06829	61.2554	-0.0761506	0
ENSP00000231484-822-932	NonDomCDR	64.8182	-1.17818	74.4874	-0.0311775	0
ENSP00000339971-39-110	NonDomCDR	50.9859	-1.31831	119.282	0.000997222	0
ENSP00000361569-206-237	DomCDR	38.7097	0.0612903	133.069	0.059125	0
ENSP00000361569-86-204	DomCDR	77.3729	-0.429661	61.6975	0.0311076	0
ENSP00000403664-1-44	NonDomCDR	29.5349	-0.993023	89.4682	0.0406773	0.681818
ENSP00000346810-257-307	NonDomCDR	66.4	-0.644	87.2412	0.0559725	0
ENSP00000301691-179-208	DomCDR	34.1379	-1.68276	28.9367	-0.233637	0
ENSP00000301691-37-72	DomCDR	36.2857	-1.59714	61.8694	-0.0936444	0
ENSP00000312134-27-68	NonDomCDR	33.4146	-1.60244	82.2595	-0.234426	1.42857
ENSP00000413766-15-86	NonDomCDR	35.7746	-1.08873	54.1722	-0.00735694	0
ENSP00000381565-52-84	NonDomCDR	33.75	-1.40625	20.3	-0.0939061	5.45455
ENSP00000381565-1-41	NonDomCDR	31.75	-1.3275	46.8171	-0.196383	12.439
ENSP00000381565-1149-1192	NonDomCDR	52.3256	-2.12093	77.9477	-0.345723	1.36364
ENSP00000246100-53-100	DomCDR	78.7234	-0.755319	99.4854	0.106994	0
ENSP00000246100-117-195	NonDomCDR	45.2564	-0.84359	105.124	-0.0138696	0
ENSP00000312066-1-52	NonDomCDR	15.4902	-1.12549	75.0269	-0.230869	5.19231
ENSP00000381036-1546-1575	NonDomCDR	60.6897	-1.51724	48.6433	-0.127057	0
ENSP00000381036-1372-1409	NonDomCDR	55.6757	-1.15405	37.1974	-0.1287	0
ENSP00000381036-1483-1529	NonDomCDR	40.2174	-1.42609	93.2085	-0.116289	0
ENSP00000381036-1414-1471	NonDomCDR	37.7193	-1.1	41.6052	-0.164388	0
ENSP00000381036-1285-1355	NonDomCDR	40.4286	-1.60429	48.607	-0.201537	0
ENSP00000380820-512-542	NonDomCDR	39	-1.25333	62.529	-0.183777	5.80645
ENSP00000380820-995-1047	NonDomCDR	82.5	-0.182692	104.228	0.047334	0
ENSP00000380820-348-431	NonDomCDR	52.8916	-1.20482	80.469	-0.129037	0.714286
ENSP00000379217-163-210	NonDomCDR	51.9149	-1.50426	48.7479	-0.27734	0.625
ENSP00000379217-1-80	NonDomCDR	50	-0.377215	58.1475	-0.0897175	0.75
ENSP00000482630-348-453	NonDomCDR	42.8571	-0.945714	75.8	-0.0232274	0
ENSP00000320084-499-534	NonDomCDR	44.8571	-1.56571	47.3222	-0.305261	2.5
ENSP00000303960-939-985	NonDomCDR	48.913	-1.64348	121.994	-0.258772	0
ENSP00000352601-660-691	NonDomCDR	88.0645	-0.467742	70.9062	0.023	0
ENSP00000352601-567-650	NonDomCDR	68.4337	-0.442169	67.9976	-0.0178012	3.21429
ENSP00000365071-184-223	NonDomCDR	32.5641	-1.18462	87.1	0.000615	0
ENSP00000365071-1-42	NonDomCDR	59.7561	-0.85122	79.1167	-0.0354357	1.42857
ENSP00000365071-46-113	NonDomCDR	57.1642	-1.17015	82.5132	-0.109038	0
ENSP00000431083-801-844	DomCDR	4.65116	-1.75349	27.1636	-0.11345	0
ENSP00000431083-887-931	NonDomCDR	42.2727	-1.43409	18.2844	-0.240136	0
ENSP00000358200-253-286	NonDomCDR	44.2424	-1.0303	68.8324	0.0426176	0.882353
ENSP00000358200-191-248	NonDomCDR	53.1579	-0.733333	48.0655	0.0254879	2.06897
ENSP00000385808-691-721	NonDomCDR	55.3333	-1.49667	55.0581	-0.154	0
ENSP00000385808-371-429	NonDomCDR	43.6207	-1.56552	85.3407	-0.255059	1.52542
ENSP00000491756-292-326	NonDomCDR	20.5882	-1.04706	19.7629	-0.128763	0
ENSP00000491756-1-36	NonDomCDR	58.5714	-1.06571	77.6417	0.0324667	0
ENSP00000491756-90-133	NonDomCDR	43.2558	-0.781395	50.2068	-0.080625	0
ENSP00000491756-214-258	NonDomCDR	53.6364	-0.161364	83.5511	0.0789111	0
ENSP00000360530-165-206	NonDomCDR	52.439	-0.897561	59.1714	-0.00934286	0
ENSP00000360530-30-78	NonDomCDR	55	-1.11458	65.1735	0.00771429	0
ENSP00000360530-112-162	NonDomCDR	50.8	-1.224	97.9451	-0.0119451	0
ENSP00000350078-275-329	NonDomCDR	50.7407	-1.1537	111.144	-0.0691618	0
ENSP00000350078-1-57	NonDomCDR	43.75	-1.48393	87.3351	-0.234854	0
ENSP00000350078-146-228	NonDomCDR	32.3171	-1.58659	58.9036	-0.228476	0
ENSP00000473820-1178-1209	NonDomCDR	47.0968	-1.04194	45.0688	-0.118513	0
ENSP00000473820-505-541	DomCDR	62.2222	-0.669444	122.576	0.100657	0
ENSP00000473820-54-92	DomCDR	38.9474	-1.43421	31.7692	-0.151941	0
ENSP00000473820-733-845	DomCDR	54.1071	-0.917857	73.7345	-0.0385593	0
ENSP00000473820-552-700	DomCDR	52.1622	-1.23176	59.1584	-0.136091	0
ENSP00000473820-847-1035	NonDomCDR	48.4574	-0.612234	61.8587	-0.00393704	0
ENSP00000473820-108-472	DomCDR	53.4615	-0.962637	59.9611	-0.0912573	0.246575
ENSP00000361281-386-415	NonDomCDR	64.1379	-0.696552	85.2067	-0.0200367	0
ENSP00000361281-436-473	NonDomCDR	58.3784	-1.12703	83.2842	-0.124237	0
ENSP00000490119-895-926	NonDomCDR	50.3226	-1.44194	16.0969	-0.164353	0
ENSP00000490119-719-752	NonDomCDR	29.697	-1.35455	74.1676	-0.0409706	2.64706
ENSP00000490119-1131-1165	NonDomCDR	54.4118	-0.597059	24.3229	0.09602	0
ENSP00000490119-1389-1424	NonDomCDR	66.8571	-0.597143	46.8056	0.00127778	0
ENSP00000490119-979-1016	NonDomCDR	31.6216	-1.79189	77.2868	-0.186437	0
ENSP00000490119-343-385	NonDomCDR	37.1429	-1.55952	73.2023	-0.105226	0
ENSP00000490119-764-806	NonDomCDR	53.3333	-0.971429	93.014	0.0563372	14.6512
ENSP00000490119-1434-1476	NonDomCDR	60.4762	-0.55	94.7186	0.0574814	0
ENSP00000490119-812-856	NonDomCDR	70.9091	-0.590909	113.849	0.09464	0
ENSP00000490119-1049-1096	NonDomCDR	76.8085	-0.585106	55.8333	0.0507979	0
ENSP00000490119-1175-1222	NonDomCDR	82.9787	-0.504255	86.8646	0.0481854	0
ENSP00000490119-1298-1365	NonDomCDR	68.5075	-0.692537	64.6912	0.0530971	0
ENSP00000432770-1-74	NonDomCDR	43.9726	-0.994521	61.1946	-0.0353378	2.83784
ENSP00000432770-295-376	DomCDR	34.9383	-1.3963	52.0329	-0.05795	1.82927
ENSP00000410298-320-422	NonDomCDR	53.5294	-0.963725	86.3029	-0.0471427	6.69903
ENSP00000367069-147-189	NonDomCDR	41.9048	-1.90714	36.8047	-0.368458	0
ENSP00000367069-534-588	NonDomCDR	65.1852	-0.555556	78.0491	-0.0244018	0
ENSP00000367069-45-111	NonDomCDR	70.9091	-0.90303	86.7716	-0.0548134	0
ENSP00000367069-592-680	NonDomCDR	67.7273	-0.663636	48.9	-0.00800786	0
ENSP00000448689-1-44	NonDomCDR	47.6744	-0.57907	55.45	0.0791977	1.36364
ENSP00000448689-499-547	NonDomCDR	87.2917	-0.995833	62.0102	-0.00266327	0
ENSP00000448689-47-109	NonDomCDR	58.2258	-0.595161	92.8794	-0.0222127	0
ENSP00000448689-558-892	NonDomCDR	51.1677	-0.871856	77.0033	-0.0291191	0
ENSP00000347532-574-631	NonDomCDR	54.5614	-1.48596	68.1	-0.21324	0
ENSP00000393460-924-960	NonDomCDR	43.3333	-1.49167	48.0919	-0.0428135	4.86486
ENSP00000393460-963-1007	NonDomCDR	57.5	-1.02045	129.858	0.0553533	0
ENSP00000393460-618-667	NonDomCDR	63.6735	-0.793878	47.918	-0.026474	3.6
ENSP00000393460-853-917	NonDomCDR	71.7188	-0.754687	64.9169	0.0163077	0.923077
ENSP00000393460-766-831	NonDomCDR	67.5385	-0.713846	49.9742	-0.0156121	3.63636
ENSP00000393460-1010-1076	NonDomCDR	62.1212	-0.974242	65.0194	-0.00175075	0.895522
ENSP00000393460-672-752	NonDomCDR	46.375	-1.2075	34.3568	-0.0970951	5.92593
ENSP00000393460-210-297	DomCDR	66.092	-1.77011	65.8057	-0.18892	0.681818
ENSP00000393460-346-598	NonDomCDR	43.8095	-1.1627	42.5194	-0.086104	2.13439
ENSP00000484515-289-449	NonDomCDR	45.9375	-1.1125	79.5596	-0.0779584	0.372671
ENSP00000302657-32-62	NonDomCDR	36	-1.23333	26.1097	-0.201435	0.967742
ENSP00000383143-694-738	NonDomCDR	46.5909	-1.71591	74.9444	-0.167978	0
ENSP00000219689-75-127	NonDomCDR	52.8846	-0.163462	115.638	0.059866	0
ENSP00000219689-1-64	NonDomCDR	31.2698	-0.504762	94.0812	-0.00309375	2.8125
ENSP00000333633-579-624	NonDomCDR	80.2222	-0.888889	64.2348	0.083963	0
ENSP00000261374-66-109	NonDomCDR	56.9767	-0.613953	87.4705	-0.00304091	0
ENSP00000369129-2814-2851	NonDomCDR	2.7027	-1.42973	152.382	0.0480395	20.5263
ENSP00000369129-1291-1331	DomCDR	83	-1.455	106.671	-0.187478	0
ENSP00000369129-1373-1443	DomCDR	66.8571	-1.39	58.7451	-0.074562	2.53521
ENSP00000263433-1-47	NonDomCDR	40.8696	-1.06522	69.4511	-0.0989128	7.02128
ENSP00000263433-281-690	NonDomCDR	49.4866	-1.22738	92.8024	-0.0948754	1.31707
ENSP00000387262-459-489	DomCDR	65.3333	-1.42667	73.8742	-0.119739	0
ENSP00000387262-156-211	DomCDR	71.0909	-0.883636	85.3857	-0.106854	0.535714
ENSP00000391998-85-138	NonDomCDR	30	-1.10189	98.8259	-0.0323463	0
ENSP00000265801-93-127	NonDomCDR	48.8235	-0.476471	37.4286	0.0508743	0
ENSP00000265801-132-219	NonDomCDR	69.5402	-0.527586	56.8648	0.0855602	0
ENSP00000313967-31-119	DomCDR	40	-0.761364	3.14045	-0.13244	0
ENSP00000364639-93-127	NonDomCDR	28.5294	-1.22647	61.3829	0.102043	0
ENSP00000364639-163-210	NonDomCDR	31.0638	-1.13617	93.15	0.116673	1.875
ENSP00000341838-1-42	DomCDR	38.5366	-1.32927	92.069	-0.0851286	47.1429
ENSP00000259469-80-110	NonDomCDR	55.3333	-2.25667	85.8935	-0.252829	0
ENSP00000338157-202-335	NonDomCDR	58.7218	-0.72406	68.7627	-0.0329433	0.671642
ENSP00000381412-314-357	NonDomCDR	38.3721	-1.42558	62.35	-0.194827	2.04545
ENSP00000342876-367-453	NonDomCDR	45.4651	-1.46628	86.5563	-0.0758506	0.344828
ENSP00000342876-14-109	NonDomCDR	57.4737	-1.14316	60.0656	-0.0412375	0
ENSP00000420267-164-199	NonDomCDR	16.8571	-1.66	77.8556	-0.0782083	0.833333
ENSP00000315379-495-526	DomCDR	57.0968	-1.42258	35.3438	-0.221081	0
ENSP00000315379-73-202	NonDomCDR	55.1938	-1.12093	97.0823	-0.0617931	0
ENSP00000298281-696-734	NonDomCDR	30.7895	-1.55789	96.7103	-0.0574077	3.07692
ENSP00000298281-1516-1555	NonDomCDR	57.4359	-0.979487	99.585	-0.114825	3
ENSP00000298281-238-653	NonDomCDR	45.3494	-1.64795	77.0091	-0.161021	1.44231
ENSP00000298281-744-1193	NonDomCDR	46.6815	-0.80245	53.5209	0.0495373	0
ENSP00000483129-1275-1312	NonDomCDR	58.1081	-0.62973	119.755	0.0250684	0
ENSP00000483129-262-306	NonDomCDR	66.5909	-1.26818	48.7822	0.0697911	0
ENSP00000483129-1521-1566	NonDomCDR	54.6667	-0.822222	71.8935	-0.129028	0
ENSP00000483129-887-954	NonDomCDR	45.3731	-0.770149	93.3662	-0.0187985	3.52941
ENSP00000483129-323-400	NonDomCDR	43.1169	-1.74286	80.7179	-0.164487	0.384615
ENSP00000483129-1316-1394	NonDomCDR	71.4103	-0.741026	85.3975	-0.0695266	3.03797
ENSP00000483129-1404-1491	NonDomCDR	50.5747	-0.814943	83.8477	0.0177057	0.340909
ENSP00000483129-1-100	NonDomCDR	42.4242	-1.1798	57.233	-0.176419	0
ENSP00000483129-960-1270	NonDomCDR	38.7419	-1.61968	105.872	-0.0954537	0
ENSP00000483129-550-868	NonDomCDR	54.3711	-0.814151	74.3367	0.0253223	1.41066
ENSP00000316842-50-84	NonDomCDR	49.4118	-0.0705882	55.1743	-0.0848429	0
ENSP00000316842-1-41	NonDomCDR	78.75	-0.18	102.478	-0.0671268	0
ENSP00000316842-251-295	NonDomCDR	24.5455	-1.61136	87.4311	-0.166851	0
ENSP00000316842-610-656	NonDomCDR	66.087	-0.167391	85.2362	0.0960213	0
ENSP00000316842-676-731	NonDomCDR	110	-0.150909	22.2875	-0.0103625	0
ENSP00000316842-356-417	NonDomCDR	78.5246	-0.380328	67.7806	-0.0431839	0
ENSP00000481495-829-859	NonDomCDR	32.6667	-1.82	86.9226	-0.329161	0.967742
ENSP00000481495-324-378	DomCDR	66.8519	-1.32593	40.8345	-0.206436	0
ENSP00000481495-258-321	DomCDR	50	-1.0254	70.9094	-0.155022	5.15625
ENSP00000481495-61-186	NonDomCDR	46.88	-1.3232	53.9103	-0.263693	0
ENSP00000405950-39-70	NonDomCDR	41.2903	-0.764516	63.9438	-0.0407719	0
ENSP00000338862-1-45	NonDomCDR	40.2273	-1.60455	106.527	-0.260071	6
ENSP00000386935-52-92	DomCDR	54	-1.2725	98.7512	-0.0354561	0
ENSP00000481948-47-85	NonDomCDR	82.3684	-0.689474	46.159	-0.034141	1.53846
ENSP00000481948-89-264	NonDomCDR	50.8571	-1.68914	80.4807	-0.157865	0
ENSP00000395675-234-293	NonDomCDR	76.1017	-0.767797	101.15	0.0381467	0.5
ENSP00000376652-111-386	NonDomCDR	44.8364	-1.00655	90.6214	-0.0610272	3.58696
ENSP00000313811-254-418	DomCDR	39.3902	-1.26829	72.1352	-0.0912333	3.45455
ENSP00000361524-8-43	NonDomCDR	50	-2.20571	140.103	-0.211961	0
ENSP00000361524-229-284	NonDomCDR	33.8182	-2.12364	97.2732	-0.263554	4.28571
ENSP00000361524-63-119	NonDomCDR	55.7143	-1.04286	25.1719	-0.0697719	0
ENSP00000394352-206-235	NonDomCDR	57.2414	-0.765517	141.013	0.06171	0
ENSP00000394352-476-512	NonDomCDR	40.8333	-1.025	16.5243	-0.0234054	0
ENSP00000394352-548-594	NonDomCDR	42.1739	-1.58261	55.5106	-0.0702915	0.638298
ENSP00000479089-225-256	NonDomCDR	31.9355	-0.735484	76.3156	-0.0620844	0
ENSP00000332723-38-83	DomCDR	41.1111	-1.04	-0.845652	-0.174698	0
ENSP00000253792-416-445	NonDomCDR	71.0345	-0.227586	19.2133	0.147863	4
ENSP00000253792-448-490	NonDomCDR	39.7619	-0.952381	107.735	-0.0988581	17.4419
ENSP00000446428-186-221	NonDomCDR	72.2857	-0.694286	54.3889	0.0698806	0
ENSP00000423276-69-192	NonDomCDR	27.8049	-1.46016	97.4685	-0.171927	0
ENSP00000250076-248-281	NonDomCDR	59.3939	-1.04545	68.7206	-0.0436824	0
ENSP00000250076-35-72	NonDomCDR	37.027	-1.14054	68.6895	-0.0402868	0
ENSP00000250076-146-186	NonDomCDR	68.25	-1.04	63.7512	-0.184127	0
ENSP00000299001-4-36	NonDomCDR	91.5625	-0.421875	65.0364	0.0788455	0
ENSP00000403323-104-133	NonDomCDR	34.1379	-0.862069	57.25	-0.07911	0
ENSP00000403323-439-511	NonDomCDR	67.7778	-0.790278	73.8027	-0.0902384	0.410959
ENSP00000403323-320-407	NonDomCDR	35.8621	-1.15632	82.7943	-0.0516898	0
ENSP00000484782-309-375	NonDomCDR	54.8485	-0.884848	73.8343	0.0294672	0
ENSP00000269391-394-612	NonDomCDR	60	-0.639908	87.0539	0.0245068	0
ENSP00000435762-173-218	NonDomCDR	20	-1.20222	88.5978	-0.176035	0
ENSP00000435762-2-159	NonDomCDR	58.6624	-0.721019	66.6981	-0.0335165	0
ENSP00000358813-366-396	NonDomCDR	39	-1.92333	103.803	-0.250755	4.83871
ENSP00000335493-309-351	NonDomCDR	40	-0.0619048	66.0209	-0.00856744	0
ENSP00000335493-379-444	NonDomCDR	57.5385	-0.0507692	53.953	0.0142136	0
ENSP00000335493-14-124	NonDomCDR	51.9091	-0.57	62.7018	-0.0966901	0
ENSP00000359293-296-369	NonDomCDR	63.0137	-0.646575	48.7216	-0.0362581	0
ENSP00000359293-385-565	NonDomCDR	39.1667	-1.08611	69.7249	-0.106988	2.1547
ENSP00000359293-1-283	NonDomCDR	53.3333	-0.931915	82.8597	-0.0369329	0
ENSP00000303158-150-186	NonDomCDR	75.8333	-0.875	131.811	0.0193892	0
ENSP00000303158-499-538	NonDomCDR	80.2564	-1.1359	56.78	-0.08808	0
ENSP00000303158-212-264	NonDomCDR	60.1923	-0.384615	49.8566	0.0167453	1.13208
ENSP00000303158-266-479	NonDomCDR	39.9061	-1.40892	34.1271	-0.20368	0.280374
ENSP00000403409-43-105	NonDomCDR	61.6129	-0.853226	98.4	-0.013181	0
ENSP00000403409-110-190	NonDomCDR	53.625	-0.74875	92.0309	0.125742	0
ENSP00000347684-273-312	NonDomCDR	50	-1.71282	85.9925	-0.152472	0
ENSP00000347684-180-229	NonDomCDR	23.8776	-1.88367	70.662	-0.27821	0
ENSP00000347684-315-365	NonDomCDR	50.8	-0.56	79.9412	0.124847	0
ENSP00000370968-699-757	DomCDR	28.4483	-2.17931	94.5254	-0.340951	3.55932
ENSP00000368565-517-550	NonDomCDR	38.4848	-1.24545	25.7794	-0.136344	0
ENSP00000368565-417-454	NonDomCDR	29.1892	-1.86216	32.9605	-0.258213	0
ENSP00000368565-287-325	NonDomCDR	46.8421	-2.00789	38.9897	-0.525308	0
ENSP00000363736-61-104	NonDomCDR	27.2093	-1.78372	85.3932	-0.21137	0
ENSP00000348849-85-115	NonDomCDR	13.3333	-1.95667	68.8484	-0.132732	0
ENSP00000377478-1-72	DomCDR	67.4648	-0.590141	93.1833	-0.0204833	0
ENSP00000291442-1-48	NonDomCDR	29.3617	-0.823404	34.6833	-0.128062	4.375
ENSP00000386738-125-317	NonDomCDR	57.0312	-0.951562	78.7679	0.0589912	1.39896
ENSP00000488022-235-265	NonDomCDR	71.6667	0.196667	105.684	0.227506	0
ENSP00000488022-166-198	NonDomCDR	52.1875	-0.584375	63.3455	-0.0523121	0
ENSP00000476447-1120-1155	DomCDR	50	-1.38571	46.475	-0.213511	0
ENSP00000476447-1932-1991	NonDomCDR	28.1356	-2.00508	64.7133	-0.264017	0
ENSP00000377665-866-895	NonDomCDR	77.2414	-0.596552	66.4667	0.01997	1
ENSP00000377665-641-679	NonDomCDR	82.1053	-0.726316	45.3949	0.00254103	0
ENSP00000377665-1015-1057	NonDomCDR	53.5714	-1.38571	33.7512	-0.202667	1.39535
ENSP00000377665-713-774	NonDomCDR	78.1967	-0.518033	60.3306	0.0234113	7.25806
ENSP00000377665-566-630	NonDomCDR	85.3125	-0.610938	34.3092	0.000875385	1.38462
ENSP00000377665-1060-1124	NonDomCDR	50.625	-0.996875	61.0262	-0.0504846	3.23077
ENSP00000377665-897-1009	NonDomCDR	44.4643	-1.28393	84.1522	-0.0128283	0
ENSP00000377665-446-564	NonDomCDR	67.7119	-0.813559	53.2437	0.00790924	2.77311
ENSP00000275493-1168-1201	NonDomCDR	44.5455	-1.1	11.0294	-0.0628824	21.1765
ENSP00000275493-1096-1140	NonDomCDR	50.9091	-1.23182	72.4089	0.00769333	13.3333
ENSP00000432149-48-80	NonDomCDR	48.75	-2.00625	35.4818	-0.405921	13.6364
ENSP00000432149-103-222	NonDomCDR	51.5126	-1.43697	52.7258	-0.278044	6.75
ENSP00000233143-1-44	DomCDR	52.3256	-1.33953	59.35	-0.21653	8.18182
ENSP00000478431-228-263	DomCDR	33.7143	-1.11143	83.0722	-0.0522528	0
ENSP00000448122-278-312	NonDomCDR	49.1176	-0.688235	55.6714	0.0180486	0
ENSP00000448122-1006-1043	NonDomCDR	45.1351	-0.672973	73.9763	-0.0462526	0
ENSP00000407047-1-45	NonDomCDR	35.6818	-1.11591	107.56	-0.116222	0
ENSP00000375863-590-822	NonDomCDR	10.1724	-1.62155	78.3343	-0.0395554	1.80258
ENSP00000383042-1-219	NonDomCDR	43.7156	-0.900459	62.6018	-0.116395	4.52055
ENSP00000421580-560-622	NonDomCDR	51.9355	-1.20484	49.5349	-0.125175	0
ENSP00000430614-1-34	DomCDR	59.0909	-1.3303	71.7628	-0.0265382	5.29412
ENSP00000262916-393-431	NonDomCDR	51.3158	-0.607895	92.1769	0.110715	0
ENSP00000338258-116-187	DomCDR	59.2958	-0.952113	61.1583	-0.150899	7.91667
ENSP00000338258-220-356	NonDomCDR	53.3088	-0.783824	69.4708	-0.0259022	1.53285
ENSP00000491215-665-810	NonDomCDR	14.8276	-1.71793	34.2096	-0.0716575	1.43836
ENSP00000368824-480-509	NonDomCDR	0	-2.35517	52.2567	-0.305627	0
ENSP00000368824-680-716	NonDomCDR	2.77778	-2.01111	96.6676	-0.171357	0
ENSP00000368824-353-395	DomCDR	62.619	-0.880952	56.3163	0.00252093	0.697674
ENSP00000368824-867-910	NonDomCDR	45.3488	-1.88372	133.157	-0.363193	1.36364
ENSP00000368824-721-773	NonDomCDR	52.5	-1.14423	104.992	0.0135943	0
ENSP00000368824-792-847	NonDomCDR	58.5455	-0.845455	73.2304	0.0864214	0
ENSP00000353796-380-413	NonDomCDR	64.8485	-0.906061	41.7735	0.0915588	0
ENSP00000353796-326-364	NonDomCDR	66.8421	-0.915789	67.1538	0.0400282	0
ENSP00000353796-1-72	NonDomCDR	41.5493	-0.980282	47.1056	-0.0456528	0
ENSP00000416125-36-92	NonDomCDR	43.3929	-1.2	89.0175	-0.0142456	0
ENSP00000304234-820-948	DomCDR	47.2656	-1.16328	39.9868	-0.152701	0
ENSP00000381628-813-941	DomCDR	47.2656	-1.16328	39.9868	-0.152701	0
ENSP00000354671-477-506	NonDomCDR	47.2414	-1.02759	80.33	-0.0998567	0
ENSP00000354671-1066-1096	NonDomCDR	29.3333	-0.956667	151.058	0.111642	0
ENSP00000354671-274-305	DomCDR	25.1613	-1.50968	134.084	-0.0301688	2.8125
ENSP00000354671-860-893	NonDomCDR	62.1212	-1.53636	85.9059	-0.167735	1.76471
ENSP00000354671-227-261	DomCDR	57.3529	-0.691176	90.3657	0.146391	0
ENSP00000354671-1189-1240	NonDomCDR	44.1176	-1.45098	81.0692	-0.123148	0
ENSP00000354671-1737-1798	NonDomCDR	70.3279	-1.07377	64.9952	-0.0540016	0
ENSP00000354671-1-67	NonDomCDR	41.3636	-1.59394	106.797	-0.117854	8.95522
ENSP00000354671-1654-1726	NonDomCDR	53.0556	-1.025	66.0041	-0.0194507	0
ENSP00000354671-907-1021	NonDomCDR	56.4912	-0.817544	77.7261	0.00538261	0
ENSP00000354671-1242-1651	NonDomCDR	64.7188	-0.722005	83.8361	0.0174093	0.731707
ENSP00000234420-20-79	NonDomCDR	45.2542	-0.838983	83.4067	-0.0932567	28
ENSP00000234420-193-359	NonDomCDR	46.9277	-1.25	85.7832	-0.134004	7.54491
ENSP00000437133-151-193	DomCDR	48.8095	-2.06429	14.5837	-0.297651	0
ENSP00000331500-54-114	DomCDR	40.8333	-1.01667	66.2328	-0.0902164	0
ENSP00000304895-442-472	NonDomCDR	52	-0.673333	59.7677	0.0800065	5.80645
ENSP00000304895-1190-1242	NonDomCDR	26.3462	-1.46154	134.525	-0.0667189	5.66038
ENSP00000304895-918-1010	NonDomCDR	42.5	-0.716304	102.526	0.0728	0
ENSP00000304895-760-903	NonDomCDR	64.1958	-0.927972	61.7062	0.0445229	4.58333
ENSP00000304895-1012-1170	NonDomCDR	55.8228	-0.36962	65.0849	0.0575987	4.15094
ENSP00000304895-256-415	NonDomCDR	44.2138	-0.803145	88.1681	0.110211	11.625
ENSP00000304895-477-754	NonDomCDR	43.3213	-0.767509	83.9784	0.0771047	7.44604
ENSP00000447300-263-296	NonDomCDR	14.8485	-1.27879	77.1735	-0.0906971	15
ENSP00000345895-301-352	NonDomCDR	45.6863	-1.02549	64.4788	-0.156331	1.73077
ENSP00000285848-462-494	NonDomCDR	48.75	-1.44687	73.097	-0.0671121	0
ENSP00000486723-525-555	NonDomCDR	39	-1.76	43.6355	-0.231526	0
ENSP00000479563-95-180	NonDomCDR	44	-1.16	71.8814	-0.189963	0
ENSP00000486000-456-500	NonDomCDR	35.4545	-1.75455	71.9622	-0.382784	9.33333
ENSP00000480726-8-40	NonDomCDR	58.125	-1.40938	129.291	-0.2799	0
ENSP00000480726-331-368	DomCDR	60.5405	-1.55405	77.8421	-0.133989	0
ENSP00000348381-665-697	NonDomCDR	45.625	-1.425	95.7333	-0.235585	16.3636
ENSP00000348381-433-474	NonDomCDR	35.6098	-1.58049	84.3167	-0.0682429	5
ENSP00000348381-1-51	NonDomCDR	39	-1.304	85.2314	0.0495824	18.2353
ENSP00000348381-477-613	NonDomCDR	67.3529	-1.13603	65.3073	-0.0762737	0.437956
ENSP00000410862-372-404	NonDomCDR	55	-1.11563	31.4758	-0.0923182	0
ENSP00000363891-1080-1119	NonDomCDR	95.1282	-0.541026	71.4925	0.01574	0
ENSP00000490393-142-172	NonDomCDR	32.6667	-0.93	46.8226	0.0390129	0
ENSP00000490393-555-591	NonDomCDR	35.8333	-0.6	74.8919	-0.0346541	0
ENSP00000490393-456-534	NonDomCDR	45.1282	-0.789744	130.051	0.0324241	0
ENSP00000490393-191-300	NonDomCDR	51.1009	-0.829358	58.5945	0.0239309	0
ENSP00000269392-1047-1083	DomCDR	70.5556	-1.325	72.5595	-0.115568	5.67568
ENSP00000269392-220-268	NonDomCDR	48.75	-1.02917	56.3878	-0.0381857	0
ENSP00000269392-1-215	NonDomCDR	62.4766	-0.635047	71.233	0.0412191	1.81395
ENSP00000269392-275-527	NonDomCDR	61.7857	-1.11032	62.9478	-0.0684008	1.89723
ENSP00000326324-1290-1327	NonDomCDR	44.5946	-1.49459	16.7763	-0.0968105	0
ENSP00000326324-1383-1434	NonDomCDR	32.7451	-1.26667	34.1154	-0.0371154	0
ENSP00000326324-1178-1237	NonDomCDR	51.3559	-1.17966	55.8783	-0.0923617	0
ENSP00000326324-58-157	NonDomCDR	52.3232	-1.08586	81.565	-0.049206	0
ENSP00000427661-349-378	NonDomCDR	47.2414	-1.65172	60.9033	-0.0595967	0
ENSP00000427661-186-219	DomCDR	29.697	-1.7	41.6382	-0.0959647	0
ENSP00000427661-1-49	NonDomCDR	36.6667	-1.13125	53.9592	-0.111753	0.612245
ENSP00000313500-593-631	NonDomCDR	54.2105	-1.07368	60.2846	-0.149805	0
ENSP00000313500-374-422	NonDomCDR	63.125	-0.722917	82.5347	0.0661102	0
ENSP00000313500-307-368	NonDomCDR	70.3279	-0.404918	64.4823	0.120426	2.90323
ENSP00000274710-737-771	NonDomCDR	37.3529	-1.25882	36.0571	-0.140711	0
ENSP00000274710-175-227	NonDomCDR	71.5385	-0.326923	65.3679	0.0623642	0
ENSP00000274710-84-139	NonDomCDR	71.0909	-0.787273	56.2107	-0.0315982	0
ENSP00000274710-239-307	NonDomCDR	51.7647	-0.992647	46.5638	-0.106578	0
ENSP00000274710-1-70	NonDomCDR	42.4638	-1.16957	70.4229	-0.122956	0.857143
ENSP00000364995-320-349	NonDomCDR	26.8966	-1.63793	67.37	-0.0538967	0
ENSP00000364995-98-148	NonDomCDR	43.4	-0.726	65.2961	-0.0419667	0
ENSP00000364995-390-458	NonDomCDR	50.2941	-0.905882	54.3884	-0.00997101	0
ENSP00000359321-432-497	NonDomCDR	54.1538	-0.798462	49.1182	0.0848212	1.36364
ENSP00000359321-355-430	NonDomCDR	53.3333	-1.25733	24.4039	-0.175858	0
ENSP00000355237-457-486	DomCDR	67.2414	-1.33448	55.65	-0.0396633	0
ENSP00000355237-548-577	DomCDR	91.0345	-1.07586	34.8933	-0.127943	0
ENSP00000355237-512-545	DomCDR	76.6667	-1.71212	68.1059	-0.156656	0
ENSP00000355237-585-627	DomCDR	60.4762	-1.5881	58.4581	-0.196416	0
ENSP00000355237-965-1017	NonDomCDR	43.4615	-0.832692	95.4717	-0.0326226	0
ENSP00000445408-157-187	DomCDR	68.3333	-1.74333	116.377	-0.218661	0
ENSP00000445408-355-387	DomCDR	88.4375	-0.653125	63.6576	0.0193697	1.81818
ENSP00000231121-157-198	NonDomCDR	54.878	-1.36341	67.7786	-0.206055	0
ENSP00000231121-53-110	NonDomCDR	46.6667	-0.942105	81.9207	-0.0899345	0
ENSP00000467280-459-494	NonDomCDR	64	-0.874286	64.2944	-0.00191111	1.66667
ENSP00000467280-496-1023	NonDomCDR	47.6471	-1.05901	78.3394	-0.0573134	0
ENSP00000479667-741-798	NonDomCDR	17.193	-1.49474	86.619	-0.070719	9.82759
ENSP00000396225-19-66	NonDomCDR	51.7021	-0.808511	54.8208	0.0662521	0
ENSP00000396225-139-229	NonDomCDR	51.1111	-1.22	81.8154	-0.0739462	0
ENSP00000360821-232-274	NonDomCDR	58.8095	-0.585714	36.3419	-0.156795	0
ENSP00000361556-106-135	NonDomCDR	37.2414	-1.78621	82.4233	-0.138583	0
ENSP00000361556-12-43	NonDomCDR	75.8065	-0.770968	73.4312	-0.0334844	0
ENSP00000361556-217-262	DomCDR	65.1111	-0.88	19.0457	-0.000217391	0
ENSP00000322956-287-316	NonDomCDR	50.3448	-1.18966	71.0733	-0.09583	0
ENSP00000278935-1197-1226	NonDomCDR	57.2414	-0.627586	62.5933	-0.02955	0
ENSP00000278935-155-188	NonDomCDR	79.697	-0.387879	70.1412	0.0926353	3.52941
ENSP00000278935-644-677	DomCDR	88.7879	-1.16667	107.676	-0.0129735	0
ENSP00000278935-885-918	DomCDR	70.9091	-2.1	96.3176	-0.110335	0
ENSP00000278935-836-870	DomCDR	45.8824	-2.11176	69.7114	-0.23798	0
ENSP00000278935-210-247	NonDomCDR	84.3243	-1.03784	84.1842	-0.0539132	0
ENSP00000278935-1041-1083	NonDomCDR	88.0952	-0.819048	61.5163	0.0261163	0
ENSP00000278935-1119-1190	NonDomCDR	59.2958	-1.4493	47.1264	-0.133828	0
ENSP00000278935-681-755	DomCDR	78.1081	-1.36892	72.3667	-0.206444	0
ENSP00000278935-429-642	DomCDR	65.5869	-1.15915	113.365	-0.143294	0.140187
ENSP00000335397-308-337	NonDomCDR	44.1379	-0.765517	67.1833	0.03832	0
ENSP00000335397-342-379	NonDomCDR	29.1892	-1.56486	54.4026	-0.123961	0
ENSP00000270458-272-307	NonDomCDR	16.8571	-1.17143	153.594	0.0387889	0
ENSP00000270458-331-425	NonDomCDR	53.2979	-0.141489	47.0642	-0.0163105	0
ENSP00000348278-358-420	NonDomCDR	40.9677	-1.48871	66.4111	-0.191773	4.28571
ENSP00000312439-328-370	NonDomCDR	58.0952	-1.52143	98.407	-0.144114	0
ENSP00000406541-73-122	DomCDR	36.1224	-0.738776	81.918	0.005984	0
ENSP00000258201-541-619	NonDomCDR	86.2821	-0.292308	84.5608	0.0330709	0.759494
ENSP00000258201-450-535	NonDomCDR	71.5294	-0.622353	79.9523	-0.0261547	3.83721
ENSP00000258201-338-433	NonDomCDR	51.4737	-0.681053	102.636	-0.0239677	0.9375
ENSP00000258201-996-1164	NonDomCDR	60.9524	-0.8625	71.4124	-0.00230118	0
ENSP00000322229-1-71	NonDomCDR	60.4286	-0.475714	65.262	0.0499887	0.422535
ENSP00000370270-435-507	NonDomCDR	35.2778	-1.3375	82.6452	-0.0210493	0
ENSP00000159087-1-32	NonDomCDR	35.1613	-0.825806	59.825	-0.149341	0.9375
ENSP00000159087-524-616	DomCDR	38.2609	-1.59891	121.705	-0.289903	0
ENSP00000159087-619-734	DomCDR	43.3913	-1.30087	93.2931	-0.106109	0
ENSP00000159087-889-1228	NonDomCDR	44.0118	-0.918879	88.0782	-0.0293294	0
ENSP00000329933-113-146	NonDomCDR	67.8788	-1.02424	35.9971	-0.0918176	13.2353
ENSP00000329933-22-57	NonDomCDR	44.8571	-1.90857	82.3139	-0.250767	1.66667
ENSP00000329933-150-203	NonDomCDR	71.8868	-0.815094	55.5852	-0.0350056	0
ENSP00000329933-533-705	NonDomCDR	68.0814	-0.499419	71.5058	0.070263	1.56069
ENSP00000375909-283-317	NonDomCDR	51.7647	-1.39706	79.2571	-0.1221	0
ENSP00000375909-1381-1415	NonDomCDR	65.8824	-0.802941	74.66	-0.00408571	0
ENSP00000375909-357-393	NonDomCDR	48.8889	-1.23056	46.773	-0.0756243	0
ENSP00000375909-1568-1604	NonDomCDR	59.7222	-0.716667	87.5054	-0.0757973	0
ENSP00000375909-979-1020	NonDomCDR	57.0732	-1.8	41.8119	-0.236395	0
ENSP00000375909-739-783	NonDomCDR	40	-1.17727	100.078	-0.0242578	0
ENSP00000375909-792-888	NonDomCDR	41.6667	-1.34792	84.2928	-0.0669165	0
ENSP00000375909-1432-1552	NonDomCDR	48.9167	-1.02083	60.5364	-0.0652826	0
ENSP00000399259-659-690	NonDomCDR	47.4194	-0.841935	66.1688	0.0396437	0
ENSP00000399259-607-656	NonDomCDR	73.6735	-0.269388	101.542	0.053402	0
ENSP00000399259-410-464	NonDomCDR	61.6667	-1.03519	82.8309	-0.0843327	0.545455
ENSP00000417955-1258-1294	NonDomCDR	97.7778	0.05	73.9919	0.166214	0
ENSP00000417955-1195-1255	NonDomCDR	29.5	-1.6	85.9705	-0.116985	0
ENSP00000470804-5-35	NonDomCDR	68.3333	-0.41	134.555	0.0511	0
ENSP00000470804-848-878	NonDomCDR	49	-0.866667	60.3581	-0.0170032	12.5806
ENSP00000325917-720-749	NonDomCDR	77.2414	-0.617241	49.2633	-0.01173	0
ENSP00000325917-201-234	DomCDR	23.6364	-1.52121	27.6647	-0.02875	0
ENSP00000315182-448-493	NonDomCDR	41.1111	-1.17556	106.47	-0.113311	0
ENSP00000315182-513-577	NonDomCDR	73.125	-0.715625	48.9815	-0.0166138	0
ENSP00000264552-155-222	NonDomCDR	42.6866	-1.06567	33.8235	-0.207116	1.32353
ENSP00000355470-374-403	NonDomCDR	37.2414	-1.19655	121.133	-0.09377	0
ENSP00000355470-558-590	NonDomCDR	64.0625	-1.5125	95.4818	-0.131903	0
ENSP00000355470-292-342	NonDomCDR	44.8	-0.82	68.5608	-0.0203549	0
ENSP00000355470-456-511	NonDomCDR	76.3636	-1.20545	56.9429	-0.112114	0
ENSP00000355470-1-72	NonDomCDR	48.0282	-1.18169	63.9264	-0.0374375	0
ENSP00000304987-18-47	NonDomCDR	37.2414	-1.06897	137.247	0.11059	0
ENSP00000377492-40-84	DomCDR	35.4545	-2.05909	46.7822	-0.350369	4.66667
ENSP00000378897-55-88	NonDomCDR	26.9697	-0.851515	67.9294	-0.0108912	0.882353
ENSP00000255613-242-275	NonDomCDR	62.1212	-1.59091	89.7794	-0.0431059	0
ENSP00000343298-294-407	NonDomCDR	39.292	-1.01416	83.264	-0.0755921	2.10526
ENSP00000493048-404-452	NonDomCDR	54.7917	-0.66875	72.5714	-0.0175265	0.612245
ENSP00000369150-121-187	DomCDR	39.8485	-1.12424	32.2149	-0.0436463	0
ENSP00000369150-198-293	DomCDR	39.0526	-1.34947	83.6333	-0.0980406	0
ENSP00000378611-692-721	DomCDR	50.6897	-1.58276	72.6367	-0.205757	0
ENSP00000378611-502-551	NonDomCDR	61.6327	-1.23878	48.452	0.009806	0
ENSP00000378611-581-640	NonDomCDR	29.661	-1.29661	63.175	-0.0208067	0
ENSP00000378611-332-500	NonDomCDR	49.2857	-1.09048	55.0355	-0.0436609	4.43787
ENSP00000484389-335-377	NonDomCDR	72.381	-0.469048	51.0884	0.0700442	0
ENSP00000473036-291-336	NonDomCDR	82.2222	-0.742222	59.8783	-0.0727109	0
ENSP00000473036-234-285	NonDomCDR	65.098	-1.0549	36.5731	-0.142769	0
ENSP00000473036-488-635	NonDomCDR	34.2857	-1.34966	49.2514	-0.200944	0
ENSP00000265077-2216-2245	NonDomCDR	63.7931	-0.9	49.3467	-0.04218	0
ENSP00000265077-415-445	NonDomCDR	45.6667	-0.833333	33.6516	-0.024829	0
ENSP00000265077-1124-1154	NonDomCDR	48.6667	-0.803333	43.9677	0.0139871	0
ENSP00000265077-1630-1660	NonDomCDR	65	-0.306667	40.3097	0.0789613	0
ENSP00000265077-1711-1741	NonDomCDR	35.6667	-1.14333	52.6516	-0.0856097	0
ENSP00000265077-2951-2982	NonDomCDR	75.8065	-0.293548	21.9	0.0240625	0
ENSP00000265077-682-715	NonDomCDR	47.2727	-1.40909	70.0206	-0.0173971	0
ENSP00000265077-2736-2769	NonDomCDR	41.5152	-1.11515	45.9	-0.0485941	0
ENSP00000265077-890-924	NonDomCDR	60.2941	-0.629412	49.6514	-0.0202943	0
ENSP00000265077-1336-1372	NonDomCDR	83.8889	-0.605556	77.7838	0.0332622	0
ENSP00000265077-2589-2625	NonDomCDR	62.2222	-1.20833	54.7757	-0.0770297	0.810811
ENSP00000265077-2825-2861	NonDomCDR	75.8333	-0.0916667	90.0054	0.152005	0
ENSP00000265077-2987-3024	NonDomCDR	76.4865	-0.618919	85.1395	0.0418658	0
ENSP00000265077-2156-2198	NonDomCDR	53.3333	-1.07381	30.6	-0.0765093	0
ENSP00000265077-2039-2087	NonDomCDR	95.2083	-0.347917	41.3633	-0.0110286	0.612245
ENSP00000265077-2262-2310	NonDomCDR	72.9167	-0.73125	47.7061	0.0500898	0
ENSP00000265077-2090-2147	NonDomCDR	47.8947	-1.27895	130.805	-0.0710483	2.58621
ENSP00000265077-1949-2007	NonDomCDR	40.3448	-0.468966	64.5373	0.0996034	0
ENSP00000265077-2879-2937	NonDomCDR	75.6897	-0.901724	93.9763	-0.0703864	0
ENSP00000265077-2419-2478	NonDomCDR	51.1864	-0.742373	33.0833	-0.00636667	0
ENSP00000265077-2486-2545	NonDomCDR	56.1017	-1.08136	52.3167	0.0223983	0
ENSP00000265077-2332-2397	NonDomCDR	69.0769	-0.756923	71.697	0.0233773	0
ENSP00000265077-804-872	NonDomCDR	58.8235	-0.945588	40.9551	-0.0913623	0
ENSP00000265077-1222-1322	NonDomCDR	57.6	-0.737	48.098	-0.0149762	0
ENSP00000265077-1749-1849	NonDomCDR	59.5	-0.537	58.8921	0.0705931	0
ENSP00000265077-1015-1121	NonDomCDR	65.1887	-0.667925	40.1673	-0.0279505	0
ENSP00000265077-1378-1559	NonDomCDR	53.3149	-0.893923	64.6005	-0.0370434	0
ENSP00000466953-162-204	NonDomCDR	58.5714	-0.469048	130.347	-0.0101326	0
ENSP00000466953-20-149	NonDomCDR	44.031	-0.917054	68.5823	-0.0390354	0
ENSP00000463613-427-475	NonDomCDR	30.8333	-0.925	47.2449	0.0239612	0
ENSP00000298832-1074-1116	NonDomCDR	41.9048	-0.864286	102.702	0.0621326	0
ENSP00000298832-825-870	NonDomCDR	43.3333	-1.53333	43.8217	-0.13608	0
ENSP00000298832-563-614	NonDomCDR	49.8039	-1.33333	101.9	-0.163123	0
ENSP00000298832-877-936	NonDomCDR	87.6271	-0.140678	54.6233	0.192032	0
ENSP00000298832-1198-1281	NonDomCDR	70.6024	-0.468675	65.7845	0.0254786	0
ENSP00000337103-1-90	NonDomCDR	37.5281	-0.885393	64.0611	-0.0413967	16
ENSP00000458570-3-34	NonDomCDR	69.3548	-0.616129	66.5281	-0.0128031	0
ENSP00000458570-833-874	DomCDR	14.3902	-1.68293	25.5643	-0.0865667	0
ENSP00000458570-918-962	NonDomCDR	42.2727	-1.43409	18.2844	-0.240136	0
ENSP00000315070-222-370	NonDomCDR	33.1757	-1.36081	90.6832	-0.107639	0
ENSP00000465992-760-789	NonDomCDR	57.2414	-0.327586	59.1067	0.0101233	0
ENSP00000465992-530-561	NonDomCDR	94.5161	-0.380645	66.225	0.0214625	0.9375
ENSP00000465992-575-688	NonDomCDR	44.9558	-0.99115	99.0553	0.0343789	1.05263
ENSP00000465992-384-502	NonDomCDR	47.9661	-1.21525	85.0639	-0.115045	1.0084
ENSP00000261917-870-905	NonDomCDR	70	0.277143	115.036	0.141297	0
ENSP00000261917-1-193	NonDomCDR	48.0208	-0.896354	82.842	-0.0539197	2.02073
ENSP00000261917-911-1203	NonDomCDR	60.274	-0.530822	83.113	0.0497911	0
ENSP00000277225-2123-2153	NonDomCDR	26	-1.65667	79.8903	-0.136684	0
ENSP00000277225-1151-1184	NonDomCDR	41.5152	-1.12424	84.4206	-0.0144147	0.882353
ENSP00000277225-2370-2403	NonDomCDR	14.8485	-1.99697	65.5265	-0.251979	0
ENSP00000277225-2434-2470	NonDomCDR	73.0556	-1.08889	93.7568	-0.0588622	0
ENSP00000277225-611-664	NonDomCDR	62.4528	-0.992453	58.35	0.00497407	0
ENSP00000277225-698-752	NonDomCDR	88.3333	-1.22037	113.816	-0.183375	0
ENSP00000277225-490-601	NonDomCDR	43.8739	-1.23514	105.351	-0.0384964	0
ENSP00000277225-269-421	NonDomCDR	53.2895	-0.794737	51.0431	0.0703268	0.784314
ENSP00000477973-1-104	NonDomCDR	53.1068	-1.12621	72.0317	-0.0730288	0
ENSP00000477973-1057-1226	NonDomCDR	60	-1.04083	82.8524	-0.0284076	0
ENSP00000472300-105-144	NonDomCDR	30	-1.97949	76.92	-0.21193	13.5
ENSP00000472300-33-84	NonDomCDR	83.9216	-0.582353	7.76154	0.00241154	0
ENSP00000398597-1-43	NonDomCDR	46.6667	-1.42143	103.742	-0.0570093	0
ENSP00000339730-654-705	DomCDR	57.2549	-1.12745	40.5	-0.128308	0
ENSP00000339730-577-652	DomCDR	48	-1.19733	55.3395	-0.0766513	0
ENSP00000365145-175-208	NonDomCDR	41.5152	-0.69697	76.0706	-0.00409412	0
ENSP00000365145-109-159	NonDomCDR	31.4	-1.368	95.6667	-0.0235647	0
ENSP00000313600-1355-1397	NonDomCDR	50.9524	-0.916667	73.1744	-0.0301163	0
ENSP00000313600-496-540	NonDomCDR	46.5909	-1.11818	122.042	0.0895311	0
ENSP00000262715-2501-2552	NonDomCDR	13.5294	-1.66667	40.4788	-0.127685	0
ENSP00000477778-249-279	NonDomCDR	55.3333	-1.28667	66.8484	-0.160306	0
ENSP00000477778-284-330	NonDomCDR	53.0435	-1.03696	88.7213	-0.150594	0
ENSP00000477778-716-764	NonDomCDR	50.8333	-1.55	56.2224	-0.154078	0
ENSP00000477778-348-670	NonDomCDR	57.5776	-1.04658	60.6854	-0.145883	0.185759
ENSP00000379065-495-525	NonDomCDR	19.6667	-1.59333	27.0387	-0.249294	0
ENSP00000379065-867-898	NonDomCDR	38.0645	-1.30645	74.3062	-0.205541	0
ENSP00000379065-1178-1219	NonDomCDR	66.5854	-1.0561	18.0976	-0.190879	0
ENSP00000379065-1045-1097	NonDomCDR	37.5	-1.25769	90.1623	-0.0482906	4.5283
ENSP00000379065-944-1041	NonDomCDR	81.4433	-1.20928	83.6347	-0.0278245	0
ENSP00000379065-9-231	NonDomCDR	51.4414	-0.971171	66.9148	-0.076957	0
ENSP00000216797-4-42	NonDomCDR	48.9474	-1.63684	33.9821	-0.170621	6.92308
ENSP00000378338-577-614	NonDomCDR	34.3243	-1.29189	69.4395	-0.0197026	12.6316
ENSP00000378338-387-431	NonDomCDR	40	-1.39773	63.4067	-0.0920311	15.3333
ENSP00000429225-73-132	NonDomCDR	44.5763	-1.94407	74.68	-0.28401	0
ENSP00000429225-1-70	NonDomCDR	52.3188	-1.05072	59.2529	-0.0834729	3.42857
ENSP00000239144-204-243	NonDomCDR	30.2564	-2.06923	52.3625	-0.422252	0
ENSP00000239938-7-40	NonDomCDR	59.0909	-0.421212	77.05	0.200406	0
ENSP00000239938-165-198	DomCDR	41.8182	-0.375758	126.438	0.0456118	0
ENSP00000239938-202-238	NonDomCDR	46.3889	-0.383333	82.0054	0.123149	0
ENSP00000239938-258-295	NonDomCDR	65.9459	-0.843243	44.9316	-0.00437105	0.789474
ENSP00000239938-108-151	NonDomCDR	79.3023	-0.511628	38.9523	0.154634	0.681818
ENSP00000239938-45-106	NonDomCDR	22.623	-0.732787	73.2403	-0.00212742	0
ENSP00000480355-258-298	DomCDR	68.25	-0.7	65.0902	-0.0133927	0
ENSP00000480355-106-153	DomCDR	58.2979	-0.489362	35.9188	-0.0156396	0
ENSP00000480355-18-67	NonDomCDR	30	-0.806122	44.784	-0.075222	0
ENSP00000480355-163-247	DomCDR	40.7143	-1.18095	53.6224	-0.0562447	0
ENSP00000480355-300-490	DomCDR	47.4211	-0.97	78.3225	-0.0288974	0
ENSP00000335677-231-260	NonDomCDR	33.7931	-1.75862	65.09	-0.28475	3
ENSP00000335677-4-36	NonDomCDR	40.3125	0.1375	63.0697	-0.0374455	0
ENSP00000335677-358-411	NonDomCDR	57.3585	-0.592453	78.7463	0.0236593	8.88889
ENSP00000335677-568-635	NonDomCDR	75.8209	-0.625373	42.75	0.0151721	0.882353
ENSP00000351410-65-96	NonDomCDR	59.6774	-1.51935	110.45	-0.104591	8.4375
ENSP00000483522-116-151	NonDomCDR	28.2857	-1.45714	39.825	0.033475	0
ENSP00000325240-118-202	NonDomCDR	34.881	-1.38333	107.539	-0.0488035	10.2353
ENSP00000412547-12-46	NonDomCDR	45.8824	-1.48235	103.009	-0.110863	0
ENSP00000346050-234-264	NonDomCDR	39	-1.11333	31.5645	-0.181081	10.6452
ENSP00000380746-25-63	NonDomCDR	54.2105	-0.634211	59.6923	-0.0274179	0
ENSP00000425556-719-750	NonDomCDR	62.9032	-0.896774	89.7344	-0.0624594	2.8125
ENSP00000425556-880-926	NonDomCDR	38.0435	-1.55	97.7149	0.0194957	5.10638
ENSP00000425556-545-592	NonDomCDR	58.0851	-0.97234	53.7708	0.0325667	0
ENSP00000425556-598-657	NonDomCDR	84.4068	-0.415254	30.4917	0.034445	2
ENSP00000425556-180-271	NonDomCDR	43.0769	-1.12418	69.4054	-0.0278717	0
ENSP00000425556-69-173	NonDomCDR	49.8077	-1.23365	79.9524	-0.0890314	0
ENSP00000346659-30-60	NonDomCDR	52.3333	-0.756667	68.1581	-0.0243871	0
ENSP00000418485-95-125	DomCDR	26	-1.31667	29.0161	-0.128761	0
ENSP00000489706-97-143	NonDomCDR	63.913	-1.7913	115.03	-0.114011	0
ENSP00000319977-319-394	NonDomCDR	35.2	-0.964	61.6184	0.0613961	29.2105
ENSP00000322218-874-904	DomCDR	68.6667	-0.52	86.8	-0.00604516	0
ENSP00000322218-1291-1329	NonDomCDR	48.9474	-1.28421	69.8923	0.00374615	0
ENSP00000322218-615-672	NonDomCDR	32.4561	-1.3	102.647	-0.0672517	0.517241
ENSP00000322218-263-393	NonDomCDR	41.3077	-1.29615	68.716	-0.0928122	0
ENSP00000396673-489-518	NonDomCDR	73.7931	-1.77931	98.69	-0.274253	0
ENSP00000396673-453-487	NonDomCDR	85.8824	-0.888235	28.28	-0.0763229	3.42857
ENSP00000396673-809-847	DomCDR	35.7895	-2.21053	51.5949	-0.288649	0
ENSP00000396673-330-377	DomCDR	47.8723	-1.59149	105.819	-0.28526	12.5
ENSP00000396673-398-449	NonDomCDR	84.1176	-0.301961	21.2865	0.0960846	1.15385
ENSP00000396673-546-663	NonDomCDR	57.6068	-1.21111	93.5568	-0.108742	7.62712
ENSP00000474388-467-498	NonDomCDR	75.8065	-1.32903	45.8406	-0.139553	0
ENSP00000474388-506-744	NonDomCDR	47.1849	-0.82437	66.5556	0.0422891	0
ENSP00000483658-1-36	NonDomCDR	52.8571	-1.1	76.6389	-0.0313667	0
ENSP00000483658-56-98	NonDomCDR	55.7143	-0.566667	26.8488	0.0179023	0
ENSP00000344115-671-732	DomCDR	56.2295	-0.914754	46.2548	-0.0609339	2.90323
ENSP00000393183-917-946	DomCDR	61.0345	-0.310345	61.9033	0.00688	0
ENSP00000393183-968-1001	DomCDR	73.9394	-1.3	77.9147	-0.0458794	0
ENSP00000393183-234-276	NonDomCDR	37.1429	-1.48333	50.114	-0.165886	1.39535
ENSP00000393183-1389-1507	NonDomCDR	65.339	-1.66356	69.9807	-0.285177	0
ENSP00000355192-1641-1675	NonDomCDR	54.7059	-0.997059	16.2314	0.0384171	0
ENSP00000355192-1677-1711	NonDomCDR	54.4118	-0.835294	57.3286	0.10498	0
ENSP00000355192-1722-1781	NonDomCDR	38.1356	-1.14407	60.9867	0.00712667	0.5
ENSP00000302562-358-414	NonDomCDR	53.9286	-0.716071	53.514	-0.00261579	0
ENSP00000472303-1-36	NonDomCDR	52.8571	-1.1	76.6389	-0.0313667	0
ENSP00000472303-57-98	NonDomCDR	57.0732	-0.585366	25.4548	0.048569	0
ENSP00000331210-361-640	NonDomCDR	58.8889	-0.836559	83.0614	-0.0763496	0
ENSP00000418983-1-37	DomCDR	40.8333	-1.42222	73.4108	-0.0490297	0
ENSP00000418983-340-387	DomCDR	62.3404	-0.76383	83.1396	-0.0555333	0
ENSP00000418983-260-330	DomCDR	51.7143	-1.20143	71.0225	-0.168114	0
ENSP00000418983-394-528	DomCDR	51.791	-1.12164	100.992	-0.0625296	0
ENSP00000418983-47-246	DomCDR	48.794	-1.18894	56.498	-0.132889	0
ENSP00000298630-444-481	NonDomCDR	63.5135	-0.759459	92.8632	-0.0297105	0
ENSP00000298630-1-53	NonDomCDR	34.2308	-0.957692	94.9736	-0.0602453	5.66038
ENSP00000352272-101-174	DomCDR	23.0137	-0.794521	11.1176	-0.0813986	0
ENSP00000379387-294-323	NonDomCDR	77.5862	-0.534483	51.78	-0.02363	0
ENSP00000379387-912-944	NonDomCDR	49.0625	-1.6375	94.2273	-0.105582	0
ENSP00000379387-356-393	NonDomCDR	34.0541	-1.81351	25.7947	-0.190384	0
ENSP00000378127-3-47	NonDomCDR	0	-1.06136	45.4222	0.0103133	0
ENSP00000378127-156-217	NonDomCDR	6.39344	-1.32131	42.6113	-0.0672468	0
ENSP00000301019-137-170	NonDomCDR	41.8182	-0.921212	73.5324	-0.136253	0.882353
ENSP00000301019-381-417	NonDomCDR	68.3333	-0.222222	118.276	0.022227	2.43243
ENSP00000301019-1-126	NonDomCDR	53.36	-0.8896	99.9794	-0.0079	0.238095
ENSP00000318898-87-127	NonDomCDR	43.75	-1.51	81.7951	-0.14958	0
ENSP00000318898-197-239	NonDomCDR	41.9048	-1.34048	31.207	0.017086	0
ENSP00000359668-147-177	NonDomCDR	78	-0.986667	96.1258	0.0371387	0
ENSP00000427514-78-128	NonDomCDR	43.2	-0.498	51.4667	-0.0419529	0
ENSP00000427514-1-56	NonDomCDR	39.4545	-0.465455	102.861	0.0628536	8.03571
ENSP00000228515-481-543	NonDomCDR	56.6129	-1.05	89.4635	-0.0319143	0
ENSP00000400572-305-354	DomCDR	32.0408	-1.07143	75.508	-0.18531	0
ENSP00000400572-136-273	NonDomCDR	47.7372	-0.689051	76.4558	-0.0366514	5.43478
ENSP00000285046-822-851	NonDomCDR	23.7931	-1.04483	83.3033	-0.0242	0
ENSP00000285046-854-889	NonDomCDR	36.2857	-1.59429	104.456	-0.225672	0
ENSP00000285046-670-713	NonDomCDR	72.3256	-0.955814	93.8386	0.07455	0
ENSP00000285046-464-520	NonDomCDR	57.5	-0.567857	43.6649	-0.0557561	0
ENSP00000285046-38-328	NonDomCDR	54.5517	-1.02379	63.2364	-0.145742	0
ENSP00000362441-2456-2492	NonDomCDR	24.4444	-1.05	78.6865	0.026973	0.810811
ENSP00000362441-1963-2003	NonDomCDR	39	-1.25	50.8512	-0.112829	5.85366
ENSP00000362441-965-1096	NonDomCDR	31.2977	-1.86183	44.6136	-0.334099	0
ENSP00000362441-445-580	NonDomCDR	51.9259	-1.25333	56.6331	-0.143117	0
ENSP00000362441-1-160	NonDomCDR	47.1698	-1.26541	58.5506	-0.110821	3
ENSP00000362441-623-957	NonDomCDR	51.6467	-1.41048	49.5943	-0.173844	3.04478
ENSP00000362441-1098-1510	NonDomCDR	40.9223	-1.88932	89.0472	-0.273306	0.653753
ENSP00000431840-358-410	NonDomCDR	41.1538	-1.74038	103.594	-0.212117	0
ENSP00000362578-155-246	NonDomCDR	62.1978	-0.76044	40.1511	-0.0632141	1.30435
ENSP00000300101-129-162	NonDomCDR	59.3939	-0.6	49.8029	0.0276824	0
ENSP00000300101-268-321	NonDomCDR	66.2264	-0.896226	56.7741	-0.0518611	0
ENSP00000300101-176-238	NonDomCDR	53.5484	-0.817742	59.0095	-0.00968889	0
ENSP00000345243-606-697	NonDomCDR	36.5934	-1.42637	83.1967	-0.123693	3.91304
ENSP00000370800-126-194	DomCDR	76.1765	-0.591176	61.7435	0.0243522	0
ENSP00000489619-126-198	DomCDR	78.75	-0.591667	56.7123	0.0241671	0
ENSP00000489024-15-79	NonDomCDR	42.8125	-0.725	83.7831	0.0740569	0
ENSP00000489024-98-171	NonDomCDR	57.3973	-0.671233	33.1473	0.0370162	0
ENSP00000451235-712-751	NonDomCDR	20	-1.59744	102.735	-0.119652	0
ENSP00000451235-155-298	NonDomCDR	33.4266	-1.66713	94.3083	-0.169557	0
ENSP00000464186-1-107	NonDomCDR	38.7736	-1.10566	70.6776	-0.024986	0
ENSP00000462333-1-54	NonDomCDR	46.2264	-1.64906	146.859	-0.132396	0.555556
ENSP00000007722-857-893	DomCDR	59.7222	-1.08889	112.03	-0.0345703	0
ENSP00000427555-990-1020	NonDomCDR	52.3333	-1.05333	62.7903	-0.0995323	0
ENSP00000427555-1227-1259	NonDomCDR	58.125	-1.49063	38.4424	-0.333891	0
ENSP00000427555-1367-1404	NonDomCDR	86.7568	-0.540541	80.2474	0.136789	0
ENSP00000427555-1576-1617	NonDomCDR	64.3902	-0.209756	103.417	0.107979	0
ENSP00000427555-1301-1360	NonDomCDR	81.0169	-0.615254	47.375	-0.027265	0
ENSP00000427555-1152-1212	NonDomCDR	73	-0.58	51.8836	0.0465426	0
ENSP00000427555-1085-1147	NonDomCDR	62.9032	-0.954839	9.57302	-0.0768556	0
ENSP00000427555-1408-1474	NonDomCDR	57.7273	-0.836364	55.3299	-0.0457	0
ENSP00000427555-1478-1567	NonDomCDR	50.5618	-0.77191	72.0033	0.0299522	0
ENSP00000427555-405-509	NonDomCDR	36.8269	-0.823077	53.6676	-0.0335895	0
ENSP00000427555-748-926	NonDomCDR	41.1236	-1.09045	38.019	-0.0750732	0
ENSP00000427555-144-390	NonDomCDR	46.5041	-0.894715	73.5251	-0.0628935	0
ENSP00000296603-646-689	NonDomCDR	59.0698	-1.10233	76.5364	0.0367136	0
ENSP00000296603-577-630	NonDomCDR	27.5472	-2.54151	77.0185	-0.21082	0.555556
ENSP00000352510-733-766	NonDomCDR	53.3333	-1.18788	77.0059	-0.0202235	0
ENSP00000352510-655-690	NonDomCDR	53.1429	-0.837143	80.6639	-0.0135194	0
ENSP00000352510-382-448	NonDomCDR	69.5455	-0.49697	70.8015	0.0725925	0.447761
ENSP00000352510-463-639	NonDomCDR	51.4773	-0.918182	65.8514	-0.0303537	0
ENSP00000355968-142-239	NonDomCDR	52.1649	-1.27835	22.2224	-0.0976214	1.83673
ENSP00000430384-1-73	NonDomCDR	69.0278	-0.958333	66.8096	-0.118866	1.23288
ENSP00000340271-774-815	NonDomCDR	73.9024	-0.263415	110.464	-0.0101238	0.714286
ENSP00000340271-692-752	NonDomCDR	29.1667	-3.04167	23.2902	-0.734113	0
ENSP00000340271-516-577	NonDomCDR	27.0492	-2.61148	16.0048	-0.548758	0
ENSP00000340271-606-682	NonDomCDR	69.3421	-1.30395	50.861	-0.266878	0.779221
ENSP00000340271-392-514	NonDomCDR	47.2131	-0.708197	61.8463	0.020939	3.90244
ENSP00000340271-107-388	NonDomCDR	64.1993	-0.944484	76.8418	-0.0943681	2.44681
ENSP00000323805-347-399	DomCDR	60	-0.892308	61.8962	-0.118887	0.566038
ENSP00000323805-266-319	DomCDR	51.6981	-0.828302	34.1667	-0.00172222	0.555556
ENSP00000305480-351-380	NonDomCDR	13.7931	-1.84828	34.4633	-0.423717	6
ENSP00000356832-155-185	NonDomCDR	55.3333	-1.09	129.684	-0.000777419	0
ENSP00000442478-253-287	NonDomCDR	48.8235	-0.405882	93.3057	-0.0250629	0.857143
ENSP00000488500-601-647	NonDomCDR	61.5217	-1.4087	59.3085	-0.223491	0
ENSP00000488500-507-582	NonDomCDR	50.1333	-0.473333	56.6263	-0.1223	0
ENSP00000488500-104-296	DomCDR	47.4479	-0.0270833	-0.259585	-0.15586	0
ENSP00000363667-361-403	NonDomCDR	60.4762	-1.41429	79.5535	0.00947674	11.8605
ENSP00000363667-417-486	NonDomCDR	49.4203	-1.12609	87.21	-0.0362814	1.28571
ENSP00000254846-52-85	NonDomCDR	32.7273	-1.01212	88.7765	0.00272059	0
ENSP00000254846-1288-1328	NonDomCDR	31.75	-1.6425	108.154	-0.195044	0
ENSP00000254846-184-1097	NonDomCDR	51.621	-0.805805	88.1456	-0.01049	0
ENSP00000395793-496-534	NonDomCDR	48.6842	-1.83684	44.9564	-0.143203	0
ENSP00000395793-423-481	NonDomCDR	53.7931	-0.615517	45.4017	0.0836746	4.57627
ENSP00000393275-1-36	NonDomCDR	47.7143	-0.502857	83.5528	0.132783	0
ENSP00000393275-63-123	NonDomCDR	26.1667	-0.933333	68.0836	-0.0246902	0
ENSP00000259351-306-343	NonDomCDR	44.8649	-0.781081	57.4342	0.0881316	0
ENSP00000350686-875-921	NonDomCDR	50.8696	-0.773913	59.2553	0.0266043	7.02128
ENSP00000350686-680-733	NonDomCDR	68.3019	-0.945283	67.4685	-0.0439444	0
ENSP00000350686-742-823	NonDomCDR	65.0617	-1.1679	93.7878	-0.0376171	3.65854
ENSP00000465718-135-181	DomCDR	59.5652	-0.817391	79.6681	0.0597851	3.82979
ENSP00000465718-193-250	DomCDR	35.9649	-1.23158	71.5603	-0.00402069	0
ENSP00000348578-411-465	NonDomCDR	37.963	-1.30741	30.3964	-0.0960655	2.72727
ENSP00000348578-137-349	NonDomCDR	58.7736	-1.10943	92.8056	-0.0742808	3.09859
ENSP00000405360-322-378	DomCDR	45.5357	-1.44464	64.486	-0.0936158	0
ENSP00000381102-1-82	DomCDR	51.9753	-0.454321	69.1646	0.000669512	0
ENSP00000378710-513-559	NonDomCDR	55	-0.756522	82.2383	-0.000174468	0
ENSP00000378710-854-931	NonDomCDR	81.039	-0.725974	29.491	0.00714359	0
ENSP00000378710-758-851	NonDomCDR	59.8925	-0.789247	55.1691	-0.075133	0
ENSP00000360475-344-373	NonDomCDR	74.1379	-0.3	80.6233	0.0814233	0
ENSP00000360475-292-323	NonDomCDR	79.0323	-0.219355	94.8031	-0.0383375	0
ENSP00000265354-356-388	NonDomCDR	60.9375	-0.71875	74.2333	0.0317939	0.909091
ENSP00000265354-213-297	NonDomCDR	47.619	-0.62619	50.1106	0.0659682	2.47059
ENSP00000265354-1-100	NonDomCDR	56.5657	-0.579798	38.704	-0.042789	0
ENSP00000362586-19-50	NonDomCDR	66.129	-0.845161	52.3656	-0.0468969	0
ENSP00000362586-119-151	DomCDR	49.375	-0.303125	40.4758	-0.0889364	0
ENSP00000362586-339-372	NonDomCDR	41.5152	-0.530303	27.3206	0.0850882	0
ENSP00000362586-374-408	NonDomCDR	71.4706	-0.735294	37.0857	0.0782457	0
ENSP00000362586-410-455	NonDomCDR	43.3333	-0.891111	48.6043	0.0258565	0
ENSP00000347484-110-167	NonDomCDR	54.7368	-1.12456	62.6603	0.00124138	0
ENSP00000347484-169-242	NonDomCDR	57.6712	-1.02329	83.6973	0.04605	0
ENSP00000347484-522-622	NonDomCDR	34.1	-1.479	93.0782	-0.0428584	0
ENSP00000265026-80-119	NonDomCDR	64.8718	-1.00256	33.465	-0.0464125	0
ENSP00000265026-15-58	NonDomCDR	72.5581	-0.834884	73.8727	0.00424773	0
ENSP00000265026-850-904	NonDomCDR	74.0741	-1.05185	27.7727	-0.0752745	0
ENSP00000265026-743-834	NonDomCDR	52.5275	-1.22418	95.0228	-0.0870261	0
ENSP00000265026-502-662	NonDomCDR	44.5625	-1.345	83.4037	-0.0139466	0
ENSP00000288139-64-96	NonDomCDR	33.75	-1.39688	80.6667	-0.145839	2.72727
ENSP00000288139-449-481	NonDomCDR	18.125	-1.80937	88.6152	-0.235479	0
ENSP00000288139-1-49	NonDomCDR	24.5833	-1.24375	41.8265	0.0212714	1.83673
ENSP00000288139-2123-2173	DomCDR	56.6	-1.294	33.1725	-0.0803941	0
ENSP00000288139-821-875	NonDomCDR	45	-1.77037	104.649	-0.237642	0
ENSP00000288139-1678-1833	DomCDR	52.1935	-1.37613	72.8468	-0.0251385	0.384615
ENSP00000327487-333-367	NonDomCDR	43.2353	-1.86176	34.6229	-0.173671	0
ENSP00000327487-187-304	NonDomCDR	44.2735	-1.00171	88.1127	-0.0539763	2.0339
ENSP00000341803-1-57	NonDomCDR	50.7143	-1	99.7614	-0.0379772	0
ENSP00000362904-125-171	DomCDR	95.6522	-0.652174	67.1596	-0.0581468	2.55319
ENSP00000362904-575-650	NonDomCDR	62.4	-1.25467	45.8105	-0.249861	1.57895
ENSP00000362904-1-123	DomCDR	40	-1.50328	58.8016	-0.192393	0.243902
ENSP00000040738-2610-2640	NonDomCDR	29.3333	-1.32333	21.6871	-0.147184	0
ENSP00000040738-1401-1435	NonDomCDR	71.7647	-1.15	13.1686	-0.240166	0
ENSP00000040738-2335-2375	NonDomCDR	63.5	-0.81	55.1024	-0.0268439	0
ENSP00000040738-1906-1948	NonDomCDR	67.381	-0.442857	16.7814	-0.00388837	0
ENSP00000040738-1957-2000	NonDomCDR	58.8372	-0.465116	30.9477	-0.0244227	0
ENSP00000040738-2015-2062	NonDomCDR	68.5106	-0.644681	66.2708	-0.0278354	0
ENSP00000040738-1684-1733	NonDomCDR	47.7551	-0.569388	31.13	-0.020622	4.2
ENSP00000040738-2170-2221	NonDomCDR	72.9412	-0.205882	67.0962	-0.000282692	1.15385
ENSP00000040738-2533-2584	NonDomCDR	59.4118	-0.631373	50.0077	-0.0134173	0
ENSP00000040738-69-123	DomCDR	79.4444	-1.05	43.6673	0.0717673	0
ENSP00000040738-1-56	NonDomCDR	28.7273	-0.761818	93.5589	-0.102046	36.9643
ENSP00000040738-2082-2147	NonDomCDR	57.0769	-0.624615	70.8333	0.000472727	0.454545
ENSP00000040738-1307-1375	NonDomCDR	73.2353	-0.573529	46.8797	0.00346087	2.17391
ENSP00000040738-2230-2299	NonDomCDR	60.5797	-0.413043	51.06	0.00435143	0
ENSP00000040738-486-561	DomCDR	68.9333	-1.604	73.1408	-0.241949	0.394737
ENSP00000040738-1462-1554	NonDomCDR	58.2609	-0.858696	53.3946	-0.0735849	0.967742
ENSP00000040738-2379-2523	NonDomCDR	55.625	-0.848611	51.3786	-0.0655021	0.827586
ENSP00000040738-1739-1888	NonDomCDR	52.349	-0.504698	39.2087	-0.0292693	0
ENSP00000040738-2672-3051	NonDomCDR	48.0739	-1.53325	81.9076	-0.174413	2.21053
ENSP00000435550-85-114	NonDomCDR	26.8966	-1.21379	79.1667	0.0323167	0
ENSP00000435550-146-178	NonDomCDR	12.1875	-1.63125	49.8394	-0.0290515	0
ENSP00000435550-10-53	NonDomCDR	54.4186	-1.07907	77.3841	0.00734091	0
ENSP00000435550-332-388	NonDomCDR	62.6786	-0.614286	90.0579	0.0134018	0
ENSP00000316681-93-128	DomCDR	53.4286	-1.7	40.2083	-0.24835	0
ENSP00000316681-1980-2015	NonDomCDR	41.7143	-1.24857	83.5222	-0.0744444	0
ENSP00000316681-330-366	NonDomCDR	100.278	-0.4	52.4054	0.0152838	0
ENSP00000316681-191-234	DomCDR	56.9767	-1.41628	67.1295	-0.0944568	0
ENSP00000316681-2533-2600	DomCDR	55.5224	-1.63433	48.5294	-0.176799	0
ENSP00000316681-1761-1830	NonDomCDR	49.5652	-1.63043	55.2243	-0.142559	0
ENSP00000316681-411-483	NonDomCDR	74.4444	-0.594444	60.3836	-0.0184397	0
ENSP00000342557-526-589	NonDomCDR	46.5079	-1.07302	46.2844	-0.0367625	0
ENSP00000216106-93-184	DomCDR	49.3407	-1.18901	51.5641	-0.160048	0
ENSP00000216106-285-410	NonDomCDR	59.28	-1.376	44.3992	-0.255088	0.47619
ENSP00000471191-250-283	NonDomCDR	36.0606	-0.0606061	3.16471	0.0494412	1.76471
ENSP00000471191-169-215	NonDomCDR	51.5217	0.0326087	54.8979	0.0807085	0.638298
ENSP00000295887-3-47	NonDomCDR	31.1364	-1.65	44.7333	-0.145542	0
ENSP00000361298-91-162	NonDomCDR	70.1408	-0.691549	105.046	0.0332139	0
ENSP00000326767-233-391	DomCDR	68.7975	-0.156329	78.9176	0.0200497	0
ENSP00000296473-84-246	NonDomCDR	40.4938	-1.04506	73.0436	-0.0392693	0
ENSP00000268595-214-248	NonDomCDR	14.4118	-1.85	58.8886	-0.436049	0
ENSP00000268595-1-62	NonDomCDR	29.0164	-1.70656	67.979	-0.397705	0
ENSP00000261367-597-639	NonDomCDR	30.2381	-1.42857	96.9349	-0.19974	0
ENSP00000261367-713-773	NonDomCDR	69.8333	-1.09667	55.9738	-0.0112098	0
ENSP00000261367-127-194	NonDomCDR	47.9104	-1.45373	55.7544	-0.180909	0
ENSP00000261367-777-964	NonDomCDR	47.5401	-1.16524	61.7894	-0.0750388	0
ENSP00000480151-799-845	NonDomCDR	61.5217	-0.543478	31.1638	-0.0568872	3.19149
ENSP00000480151-698-782	NonDomCDR	43.3333	-0.74881	89.5424	-0.0687106	0.352941
ENSP00000480151-427-669	DomCDR	23.4298	-0.868595	66.6901	-0.0251938	0
ENSP00000268989-200-229	NonDomCDR	70.6897	-1.51724	98.1667	-0.0368533	0
ENSP00000268989-701-816	NonDomCDR	47.4783	-1.04957	81.0741	-0.108959	0
ENSP00000263073-16-490	NonDomCDR	51.4557	-1.38354	54.0341	-0.114086	0.631579
ENSP00000225430-61-91	DomCDR	39.3333	-1.45333	48.2323	-0.0681839	0
ENSP00000225430-149-182	NonDomCDR	53.6364	-2.12121	80.0941	-0.369309	1.76471
ENSP00000449255-470-502	NonDomCDR	48.75	-1.40312	56.4545	0.00990303	1.81818
ENSP00000449255-526-575	NonDomCDR	47.9592	-0.820408	56.78	-0.01975	0
ENSP00000261892-62-97	NonDomCDR	55.7143	-0.245714	107.669	0.134819	0.833333
ENSP00000261892-102-155	NonDomCDR	42.4528	-0.939623	69.4981	0.0456981	0
ENSP00000261892-161-221	NonDomCDR	43.6667	-0.931667	24.6885	0.0651098	0
ENSP00000261892-262-332	NonDomCDR	66.7143	-0.565714	37.5	0.078938	0
ENSP00000261892-684-902	NonDomCDR	29.1743	-1.85	87.5877	-0.376131	0.136986
ENSP00000446358-1287-1337	NonDomCDR	49	-0.816	93.0843	-0.0503882	0
ENSP00000193391-180-236	NonDomCDR	80	-0.601786	74.9386	-0.0106053	0
ENSP00000263974-15-59	NonDomCDR	64.3182	-0.375	40.2978	0.0460911	5.33333
ENSP00000435300-768-802	NonDomCDR	40.2941	-1.45588	82.3543	-0.0825314	1.71429
ENSP00000435300-818-947	DomCDR	46.8992	-1.17907	39.7562	-0.1506	0
ENSP00000420840-768-812	NonDomCDR	60	-1.02273	54.2533	0.0454844	0
ENSP00000420840-819-950	DomCDR	48.3969	-1.13511	39.3053	-0.141519	0
ENSP00000354896-948-1037	NonDomCDR	71.236	-0.692135	96.4978	0.0212667	0
ENSP00000365230-28-58	NonDomCDR	29.3333	-1.46	65.6742	-0.10951	6.77419
ENSP00000491054-1299-1328	NonDomCDR	36.8966	-1.52069	48.0633	-0.165637	0
ENSP00000491054-1573-1602	NonDomCDR	50.3448	-1.21379	60.0033	-0.16306	0
ENSP00000491054-825-859	NonDomCDR	25.8824	-1.28235	59.08	0.0177971	0
ENSP00000491054-1205-1248	NonDomCDR	40.9302	-1.37209	19.5636	-0.162216	0
ENSP00000328768-230-262	DomCDR	64.0625	-0.86875	144.245	0.062503	0
ENSP00000328768-10-50	DomCDR	46.75	-0.9025	93.6024	-0.0793512	0
ENSP00000471000-105-140	NonDomCDR	58.2857	-1.79714	51.2444	-0.174489	0
ENSP00000356936-274-337	NonDomCDR	48.254	-0.734921	107.731	-0.0555203	0
ENSP00000295767-112-155	NonDomCDR	29.7674	-1.99767	101.414	-0.359891	0.681818
ENSP00000355014-271-349	NonDomCDR	22.5641	-1.86923	74.8266	-0.155671	0.379747
ENSP00000355014-371-503	NonDomCDR	53.3333	-0.966667	61.309	-0.0367038	0
ENSP00000355014-1-264	NonDomCDR	38.6312	-1.27262	81.7413	-0.0321917	0.113636
ENSP00000320291-877-908	DomCDR	50.6452	-1.94194	66.3656	-0.265116	0
ENSP00000415682-600-630	NonDomCDR	42.3333	-3.02	175.974	-0.407977	0
ENSP00000415682-728-767	NonDomCDR	54.8718	-0.997436	57.88	-0.11243	0
ENSP00000415682-1-133	NonDomCDR	20.1515	-1.34697	79.5729	-0.0865617	0.451128
ENSP00000328998-469-499	DomCDR	49	-1.25	16.6774	-0.187126	0
ENSP00000354518-1-40	NonDomCDR	67.6923	-1.13333	93.3925	-0.028435	8.25
ENSP00000354518-76-132	NonDomCDR	57.6786	-0.9375	41.3123	-0.150811	0
ENSP00000354518-146-280	NonDomCDR	53.1343	-1.21418	50.3415	-0.141588	1.11111
ENSP00000440190-202-232	NonDomCDR	68.3333	-1.07	50.8839	-0.0701774	0
ENSP00000440190-712-744	NonDomCDR	15.3125	-2.02813	99.7303	-0.0243394	0
ENSP00000440190-234-289	NonDomCDR	49.6364	-1.22909	30.7554	-0.148007	2.67857
ENSP00000440190-470-548	NonDomCDR	22.5641	-1.64359	51.9038	-0.0721253	0
ENSP00000352608-2828-2864	NonDomCDR	27.2222	-2.025	60.173	-0.280214	3.24324
ENSP00000352608-4248-4284	NonDomCDR	46.6667	-0.9	35.2459	-0.271516	0
ENSP00000352608-1865-1929	NonDomCDR	33.5938	-2.16562	148.04	-0.469186	0
ENSP00000352608-1305-1385	NonDomCDR	33.375	-1.39	57.884	-0.25506	0
ENSP00000352608-4376-4542	DomCDR	44.2169	-1.02048	65.9695	-0.206871	0
ENSP00000396416-1-160	NonDomCDR	44.1509	-1.27925	65.0219	-0.05635	0
ENSP00000415027-1106-1141	NonDomCDR	50.2857	-1.42571	106.964	-0.0869333	0
ENSP00000415027-294-397	DomCDR	77.767	-0.166019	94.499	0.0638019	0
ENSP00000493420-292-508	NonDomCDR	53.7037	-1.42917	51.1392	-0.179141	0
ENSP00000161863-1-37	NonDomCDR	24.4444	-0.811111	113.557	-0.0587378	4.86486
ENSP00000161863-1166-1290	NonDomCDR	37.8226	-1.18226	102.803	-0.0182984	0.96
ENSP00000470220-341-448	NonDomCDR	55.7009	-0.909346	72.3426	-0.0687065	0.277778
ENSP00000470220-1-155	NonDomCDR	53.8312	-0.985065	106.354	-0.00182258	0
ENSP00000383230-381-455	NonDomCDR	43.5135	-1.01486	95.5	0.0317867	0
ENSP00000385450-1159-1190	DomCDR	91.2903	-0.696774	45.6187	0.0420312	0
ENSP00000385450-1078-1113	NonDomCDR	28	-1.42	42.9	-0.114386	0
ENSP00000385450-328-364	NonDomCDR	75.8333	-1.17222	90.8919	-0.115305	0.810811
ENSP00000385450-586-624	NonDomCDR	25.7895	-1.23158	65.3974	-0.068759	0
ENSP00000385450-902-958	NonDomCDR	34.8214	-1.06786	73.8772	-0.0602544	0
ENSP00000385450-387-459	NonDomCDR	47.3611	-1.72361	107.026	-0.1511	0
ENSP00000385450-718-795	DomCDR	50.6494	-1.16234	67.5936	-0.0661551	0.769231
ENSP00000385450-1198-1462	NonDomCDR	28.9394	-2.06477	121.557	-0.151637	0.339623
ENSP00000370698-725-763	NonDomCDR	43.4211	-0.578947	98.8051	0.139879	0.769231
ENSP00000370698-869-918	NonDomCDR	41.8367	-0.687755	53.444	0.008218	5.4
ENSP00000238789-323-354	NonDomCDR	31.6129	-1.77097	84.4594	-0.0929813	0
ENSP00000238789-1089-1120	NonDomCDR	37.7419	-1.51613	50.4906	-0.0597031	0
ENSP00000238789-1307-1338	NonDomCDR	78.7097	-1.25161	49.7344	-0.189625	0.9375
ENSP00000238789-1177-1266	NonDomCDR	52.5843	-1.10787	43.3356	-0.0573267	0
ENSP00000238789-228-321	NonDomCDR	49.2473	-1.68602	96.7021	-0.0950851	0.319149
ENSP00000238789-1-159	NonDomCDR	56.2658	-0.768987	48.1491	-0.0242686	0.566038
ENSP00000345468-103-138	DomCDR	58.5714	-0.857143	57.9611	-0.118239	0
ENSP00000298569-112-141	DomCDR	47.2414	-1.3931	43.0933	-0.0704867	1
ENSP00000298569-236-305	DomCDR	66.6667	-0.728986	30.8	-0.00728571	0
ENSP00000298569-156-228	DomCDR	29.8611	-1.23611	60.5521	-0.0590863	5.34247
ENSP00000301318-1-94	NonDomCDR	57.957	-0.844086	32.5585	-0.0373872	0
ENSP00000285928-760-825	NonDomCDR	58.4615	-1.08154	70.3106	-0.0059303	0
ENSP00000378260-859-894	NonDomCDR	94.8571	0.305714	56.1	0.178197	0
ENSP00000378260-726-764	NonDomCDR	51.3158	-0.657895	55.1205	0.0760385	0
ENSP00000378260-911-975	NonDomCDR	45.7812	-0.859375	128.258	-0.0248523	0
ENSP00000378260-613-678	NonDomCDR	22.4615	-1.37846	86.5394	0.123921	0
ENSP00000332818-15-54	NonDomCDR	30	-1.81538	53.305	-0.164345	0
ENSP00000251900-569-601	NonDomCDR	60.625	-0.540625	89.6727	0.0728909	17.2727
ENSP00000251900-1-34	NonDomCDR	26.3636	-1.6303	51.3353	-0.142282	21.1765
ENSP00000251900-513-554	NonDomCDR	54.878	-1.04146	56.2619	-0.105257	0.714286
ENSP00000251900-467-511	NonDomCDR	39.7727	-1.34773	92.4733	-0.0482244	8.66667
ENSP00000264344-723-754	NonDomCDR	62.9032	-1.43226	54.3937	-0.108144	1.875
ENSP00000264344-578-611	NonDomCDR	80	-0.948485	53.2735	0.0324735	0
ENSP00000264344-627-671	NonDomCDR	44.3182	-1.47727	117.424	0.01432	1.33333
ENSP00000264344-376-448	NonDomCDR	50.1389	-1.36111	75.526	-0.060574	0.410959
ENSP00000264344-453-573	NonDomCDR	35.75	-1.52583	54.4636	-0.119469	0
ENSP00000380174-348-402	NonDomCDR	48.8889	-1.06481	56.7291	-0.131167	0
ENSP00000380174-497-558	NonDomCDR	54.5902	-1.04098	79.5484	-0.183706	0
ENSP00000380174-88-176	NonDomCDR	67.3864	-1.12727	66.4966	-0.092227	0
ENSP00000437790-702-746	DomCDR	33.4091	-0.695455	93.1756	-0.0459356	0
ENSP00000487876-128-174	DomCDR	50.8696	-1.96957	12.3872	-0.284806	0
ENSP00000482957-440-560	NonDomCDR	57.0833	-0.924167	67.8281	-0.0581083	0.247934
ENSP00000267425-1-61	NonDomCDR	24.5	-1.55167	94.1328	-0.114048	0.983607
ENSP00000479589-140-181	DomCDR	78.5366	-1.17317	68.8762	-0.120231	0
ENSP00000479589-35-87	NonDomCDR	45.1923	-0.951923	43.3868	-0.0555717	0
ENSP00000479589-326-420	NonDomCDR	47.9787	-0.759574	57.2705	-0.0619842	0
ENSP00000395535-164-227	NonDomCDR	29.3651	-1.4873	45.3422	-0.182378	1.875
ENSP00000395535-230-498	NonDomCDR	55.6716	-0.987313	70.3208	-0.114862	0.780669
ENSP00000482737-95-180	NonDomCDR	44	-1.16	71.8814	-0.189963	0
ENSP00000441823-788-818	NonDomCDR	39.3333	-1.49667	27.0032	-0.220906	0
ENSP00000441823-223-264	NonDomCDR	93.1707	-0.0804878	109.133	0.105948	0
ENSP00000441823-1-51	NonDomCDR	35.4	-1.48	88.6431	-0.217986	1.76471
ENSP00000441823-1066-1119	NonDomCDR	57.1698	-0.411321	67.5278	0.0478815	0.555556
ENSP00000441823-277-354	NonDomCDR	51.4286	-0.161039	103.168	-0.0256654	0
ENSP00000441823-74-167	NonDomCDR	45.4839	-0.83871	87.4415	-0.126964	0
ENSP00000441823-851-955	NonDomCDR	52.6923	-0.736538	91.6876	-0.03772	0.285714
ENSP00000441823-523-638	NonDomCDR	67.2174	-0.203478	85.9095	0.0556069	0
ENSP00000370057-1253-1293	NonDomCDR	51.25	-0.7125	46.6415	0.0432049	0
ENSP00000370057-809-854	NonDomCDR	56.4444	-0.973333	95.7739	-0.0996348	0
ENSP00000370057-1025-1083	NonDomCDR	32.069	-1.42069	37.1475	-0.182981	0
ENSP00000370057-1090-1148	NonDomCDR	38.9655	-0.92069	33.3678	-0.12271	0
ENSP00000370057-874-1010	NonDomCDR	58.2353	-0.749265	69.2672	-0.00187153	0
ENSP00000432232-1-35	NonDomCDR	89.1176	-0.291176	75.7114	-0.01124	0
ENSP00000432232-57-109	NonDomCDR	50.9615	-1.025	64.8245	-0.0564057	0
ENSP00000358939-492-531	NonDomCDR	55.1282	-1.46154	64.8875	-0.228995	0
ENSP00000477817-539-634	NonDomCDR	46.2105	-0.845263	57.276	0.00770729	0.3125
ENSP00000302665-119-195	NonDomCDR	23.1579	-2.05789	63.8104	-0.240622	0
ENSP00000397645-183-212	NonDomCDR	13.4483	-2.27241	74.5967	0.0484967	0
ENSP00000444737-261-301	NonDomCDR	29.5	-1.38	101.017	-0.185134	0
ENSP00000295987-14-79	NonDomCDR	31.8462	-0.518462	96.0182	0.0325833	19.0909
ENSP00000295987-405-705	NonDomCDR	43.7667	-1.053	89.7561	-0.0719126	3.78738
ENSP00000342222-1-49	NonDomCDR	40.625	-1.03333	60.6653	-0.0423041	0.612245
ENSP00000477507-1-35	NonDomCDR	74.7059	-1.01471	105.877	0.0211286	3.42857
ENSP00000477507-50-112	NonDomCDR	80.6452	-0.312903	68.3063	0.00410635	0
ENSP00000229769-174-277	NonDomCDR	42.7184	-1.6534	104.518	-0.244716	1.44231
ENSP00000301159-36-98	NonDomCDR	37.9032	-1.6371	64.9651	-0.143321	0
ENSP00000301159-127-210	DomCDR	44.5783	-1.23133	107.094	-0.0521631	5.35714
ENSP00000291576-235-266	NonDomCDR	44.1935	-2.11935	111.769	-0.351787	0
ENSP00000375593-149-190	NonDomCDR	73.6585	-0.978049	52.1571	-0.00837619	0
ENSP00000375593-200-350	NonDomCDR	59.2	-1.03333	57.2623	-0.099243	0.198675
ENSP00000337332-280-355	NonDomCDR	52.1333	-1.264	89.1829	-0.120893	2.76316
ENSP00000286063-33-121	NonDomCDR	52.1591	-0.7125	54.0472	0.0247011	0
ENSP00000434552-1-36	NonDomCDR	78.2857	0.231429	36.8389	0.0950833	0.833333
ENSP00000434552-210-265	NonDomCDR	72.7273	-0.536364	56.4982	0.0954071	0
ENSP00000434552-698-768	NonDomCDR	47.2857	-1.18143	64.2423	0.0108352	0
ENSP00000434552-775-1135	NonDomCDR	59.1389	-0.739167	46.8258	0.0909715	0
ENSP00000434552-268-696	NonDomCDR	49.9766	-1.18738	101.791	-0.0151152	0
ENSP00000365176-92-131	DomCDR	37.6923	-1.69744	94.2125	-0.197128	0
ENSP00000365176-212-253	DomCDR	64.1463	-1.30732	68.8786	-0.0966905	1.42857
ENSP00000365176-138-202	DomCDR	59.5312	-1.17656	26.7708	-0.0510215	1.38462
ENSP00000295171-294-335	DomCDR	54.878	-1.17561	50.0405	-0.0939167	0
ENSP00000295171-128-268	NonDomCDR	54.5	-0.910714	65.3128	-0.0588787	0
ENSP00000398632-156-185	NonDomCDR	33.4483	-1.54828	40.1833	-0.101677	0
ENSP00000398632-679-731	NonDomCDR	58.0769	-1.05962	19.9811	-0.108396	9.62264
ENSP00000398632-584-643	NonDomCDR	36.2712	-0.915254	31.0233	0.0250617	4.5
ENSP00000398632-258-578	NonDomCDR	35.4062	-1.23	41.3991	0.00878692	2.52336
ENSP00000367440-69-106	NonDomCDR	52.7027	-1.23514	70.9053	-0.0784263	0
ENSP00000320188-1-44	NonDomCDR	18.3721	-1.64419	37.0909	-0.0965295	2.72727
ENSP00000320188-324-378	NonDomCDR	42.037	-0.877778	45.4636	-0.200438	0
ENSP00000320188-467-532	NonDomCDR	73.8462	-0.492308	130.195	-0.0246242	1.36364
ENSP00000320188-111-212	NonDomCDR	63.2673	-0.674257	68.6451	-0.0970882	0.882353
ENSP00000373090-318-354	NonDomCDR	35.2778	-1.25278	70.6297	-0.177965	11.3514
ENSP00000373090-525-607	NonDomCDR	45.2439	-1.34146	89.5699	-0.186748	4.33735
ENSP00000373090-1-89	NonDomCDR	37.6136	-1.93068	86.3348	-0.119183	12.809
ENSP00000272342-693-728	DomCDR	52.8571	-0.965714	27.5694	0.00355833	0
ENSP00000272342-621-657	DomCDR	56.9444	-1.66389	53.4838	-0.150905	0
ENSP00000272342-874-914	DomCDR	53.75	-1.8	121.985	-0.229737	0
ENSP00000304108-696-725	DomCDR	50.3448	-1.68621	39.0767	-0.130457	0
ENSP00000304108-579-612	DomCDR	65.1515	-1.15758	83.4912	-0.0188706	0
ENSP00000304108-473-529	DomCDR	50.5357	-1.58036	70.8035	-0.0709491	0
ENSP00000304108-763-819	DomCDR	48.75	-1.35536	83.9456	-0.12087	1.05263
ENSP00000290663-151-180	DomCDR	43.7931	-1.63793	62.8367	-0.180193	0
ENSP00000290663-100-132	DomCDR	70	-1.1	48.5091	-0.0932424	0
ENSP00000290663-192-261	DomCDR	53.913	-0.478261	58.2857	0.0254043	0
ENSP00000488570-114-151	DomCDR	10.8108	-1.36216	80.2079	-0.0417184	0
ENSP00000429430-107-136	DomCDR	60.6897	-0.648276	47.3	0.0899067	0
ENSP00000429430-138-296	DomCDR	54.4304	-1.04873	86.3566	0.048261	0
ENSP00000483467-312-359	NonDomCDR	33.1915	-1.28511	30.6583	-0.152031	0
ENSP00000454407-36-98	NonDomCDR	44.1935	-1.62742	56.1317	-0.195405	0
ENSP00000454407-713-909	NonDomCDR	41.1735	-0.887755	50.6091	-0.216921	0
ENSP00000384625-85-140	NonDomCDR	55.4545	-0.776364	72.6982	-0.0292696	0
ENSP00000384625-15-83	NonDomCDR	62.3529	-0.519118	28.2203	0.0852058	2.17391
ENSP00000242505-543-582	NonDomCDR	32.5641	-1.22308	55.895	-0.0171925	0
ENSP00000242505-16-62	NonDomCDR	53.0435	-1.3	60.866	-0.0887553	0
ENSP00000242505-408-540	NonDomCDR	68.6364	-0.779545	69.4075	0.096815	0
ENSP00000380659-582-619	DomCDR	55.4054	-0.605405	77.7053	0.130832	2.36842
ENSP00000380659-647-695	DomCDR	42.7083	-0.970833	71.7694	0.0300633	4.89796
ENSP00000380659-880-953	NonDomCDR	73.4247	-0.628767	83.0527	0.121412	3.24324
ENSP00000380659-699-859	NonDomCDR	70.6875	-0.69625	62.6422	0.0295839	1.67702
ENSP00000325312-131-164	NonDomCDR	23.9394	-1.70606	69.0441	-0.222397	0
ENSP00000325312-1-125	NonDomCDR	44.1935	-1.49597	41.4528	-0.30689	0
ENSP00000359546-61-93	DomCDR	70	-1.10938	82.6364	0.00487879	0
ENSP00000359546-1-48	DomCDR	27.0213	-1.20426	93.475	-0.108252	0
ENSP00000395232-332-378	NonDomCDR	31.7391	-1.34348	87.234	-0.0223787	0
ENSP00000264515-343-389	NonDomCDR	53.0435	-0.995652	59.1809	-0.13357	3.82979
ENSP00000264515-397-537	NonDomCDR	64.1429	-1.01929	47.7539	-0.164186	0.851064
ENSP00000332549-1340-1371	DomCDR	62.9032	-1.0871	70.125	0.0150063	0
ENSP00000332549-1097-1181	DomCDR	50.9524	-1.24762	39.4353	-0.0303976	0.352941
ENSP00000332549-977-1094	DomCDR	50	-1.32821	49.0305	-0.0424831	0
ENSP00000480861-505-542	NonDomCDR	50	-0.883784	67.2132	-0.0242474	0
ENSP00000480861-59-217	DomCDR	61.5823	-0.567089	83.2006	0.0884421	0
ENSP00000478478-490-528	DomCDR	38.4211	-2.52368	126.931	-0.317623	0
ENSP00000478478-323-362	DomCDR	20	-2.42051	126.627	-0.250812	0
ENSP00000478478-1-126	NonDomCDR	47.68	-1.2968	45.9865	-0.0291024	0
ENSP00000478478-530-668	DomCDR	31.8116	-2.32391	123.924	-0.318873	0
ENSP00000261402-25-58	NonDomCDR	68.1818	-1.30303	36.3794	-0.0808676	7.05882
ENSP00000261402-533-567	NonDomCDR	71.7647	-0.305882	93.94	0.103403	1.71429
ENSP00000261402-343-424	NonDomCDR	55.4321	-1.06173	70.3512	-0.11425	0.365854
ENSP00000261402-436-519	NonDomCDR	59.8795	-0.757831	95.0833	0.0209929	1.78571
ENSP00000370377-779-834	DomCDR	51.2727	-1.00545	90.4804	-0.0157714	0
ENSP00000360690-427-456	NonDomCDR	33.7931	-1.5931	87.7333	-0.248033	0
ENSP00000360690-349-413	NonDomCDR	35.3125	-1.42188	63.9892	-0.191611	0
ENSP00000360690-8-75	NonDomCDR	65.6716	-0.673134	49.5338	-0.0516691	0
ENSP00000262186-1008-1053	DomCDR	88.8889	-0.933333	87.0935	0.07585	0
ENSP00000262186-1111-1159	NonDomCDR	69.1667	-0.595833	79.2878	0.0676837	3.67347
ENSP00000262186-206-274	NonDomCDR	66.1765	-0.629412	73.6043	0.038013	0.434783
ENSP00000262186-864-989	NonDomCDR	32	-1.172	83.7881	-0.055073	1.42857
ENSP00000382356-999-1066	NonDomCDR	49.5522	-0.991045	61.7765	-0.0817868	0
ENSP00000374359-469-504	NonDomCDR	69.7143	-0.957143	117.236	0.0412667	0
ENSP00000374359-718-759	NonDomCDR	43.1707	-1.29268	43.3	-0.129138	0
ENSP00000374359-628-711	NonDomCDR	62.4096	-0.677108	65.6726	0.0181548	0.357143
ENSP00000374359-1-129	NonDomCDR	67.3437	-0.428125	80.662	-0.0158682	0
ENSP00000265748-300-331	NonDomCDR	75.4839	-0.583871	38.85	-0.0303625	8.4375
ENSP00000265748-575-606	NonDomCDR	60	-1.26452	95.6063	-0.175834	0
ENSP00000265748-625-665	NonDomCDR	56	-1.2325	46.0512	-0.0809366	10.9756
ENSP00000265748-448-514	DomCDR	39.8485	-1.27273	54.506	-0.13973	3.13433
ENSP00000265748-349-431	NonDomCDR	51.2195	-1.18659	60.247	-0.0294578	9.39759
ENSP00000329869-893-933	NonDomCDR	51.5	-1.14	51.0341	-0.0619195	0
ENSP00000295550-2856-2989	NonDomCDR	68.3459	-0.210526	45.8373	-0.0467597	0.223881
ENSP00000295550-2045-2376	DomCDR	30.6344	-1.24653	11.9822	-0.16058	0.0903614
ENSP00000395864-15-86	NonDomCDR	35.7746	-1.08873	54.1722	-0.00735694	0
ENSP00000317902-202-234	DomCDR	67.5	-1.3125	57.2939	-0.217824	0
ENSP00000317902-429-485	NonDomCDR	57.5	-1.64643	55.0772	-0.225509	0
ENSP00000392283-1-106	DomCDR	50.381	-0.809524	67.4698	-0.159107	0
ENSP00000482117-469-502	NonDomCDR	14.8485	-1.97576	92.3588	-0.185062	0
ENSP00000380252-333-457	NonDomCDR	54.1935	-0.950806	60.6096	-0.0289488	2.4
ENSP00000348128-1229-1259	NonDomCDR	78	-0.343333	49.7968	0.0532323	0.967742
ENSP00000348128-936-968	NonDomCDR	27.5	-1.55	43.3576	-0.128618	3.63636
ENSP00000348128-1138-1191	NonDomCDR	62.6415	-1.40755	100.691	-0.0826426	1.11111
ENSP00000348128-977-1038	NonDomCDR	64.0984	-1.11475	56.2871	-0.0242129	0
ENSP00000348128-1052-1123	NonDomCDR	49.7183	-0.690141	51.4028	-0.0546681	2.5
ENSP00000348128-33-111	NonDomCDR	40.1282	-1.33462	72.857	-0.0513899	0
ENSP00000348128-608-689	NonDomCDR	31.2346	-1.69753	54.8	-0.113648	5.12195
ENSP00000348128-704-811	NonDomCDR	67.5701	-0.836449	84.2565	-0.0240602	1.66667
ENSP00000348128-455-590	NonDomCDR	64.2963	-1.01481	66.4081	-0.0438419	2.42647
ENSP00000348128-308-448	NonDomCDR	55.7143	-0.884286	70.1745	-0.0511071	1.2766
ENSP00000348128-127-293	NonDomCDR	43.012	-1.1759	78.8641	-0.0588994	9.16168
ENSP00000399711-1-106	DomCDR	50.381	-0.809524	67.4698	-0.159107	0
ENSP00000233809-186-232	NonDomCDR	59.3478	-1.35435	50.3787	-0.131509	0
ENSP00000233809-134-184	NonDomCDR	48.8	-1.028	38.5569	-0.0762863	0
ENSP00000405899-273-307	NonDomCDR	25.8824	-1.26176	42.7543	-0.13754	0
ENSP00000222005-346-378	NonDomCDR	64.0625	-0.9125	26.3909	-0.25163	2.72727
ENSP00000377218-230-261	NonDomCDR	28.3871	-1.87097	114.759	-0.181819	0
ENSP00000377218-117-149	NonDomCDR	54.6875	-1.75937	66.6939	-0.332155	2.72727
ENSP00000377218-299-341	NonDomCDR	55.7143	-0.754762	66.3233	0.0917163	0
ENSP00000307129-258-294	NonDomCDR	60	-1.18333	34.8676	-0.187676	0
ENSP00000315659-1485-1514	NonDomCDR	37.2414	-1.32414	80.8767	-0.184303	0
ENSP00000315659-217-247	NonDomCDR	55	-1.25	52.7484	-0.17291	0
ENSP00000315659-1349-1388	NonDomCDR	20	-1.32564	81.37	0.0496525	0.75
ENSP00000315659-1393-1483	NonDomCDR	31.4444	-1.20778	81.5659	-0.0218923	0.32967
ENSP00000315659-588-690	NonDomCDR	75.4902	-0.802941	80.5019	0.0322534	0.582524
ENSP00000315659-305-465	NonDomCDR	59.125	-0.921875	66.9671	0.0239118	0.559006
ENSP00000427089-20-50	DomCDR	78	-1.39333	42.9032	-0.109897	71.6129
ENSP00000427089-958-989	DomCDR	34.5161	-1.4129	82.5187	-0.0339844	0.9375
ENSP00000427089-771-803	DomCDR	48.75	-1.37812	94.4121	-0.00636667	2.72727
ENSP00000427089-2146-2188	NonDomCDR	55.7143	-1.2381	56.007	-0.14203	2.09302
ENSP00000427089-1966-2012	NonDomCDR	38.2609	-1.5587	64.7106	-0.173647	0.638298
ENSP00000427089-889-943	DomCDR	45.1852	-1.1037	60.2491	0.0257291	1.63636
ENSP00000427089-1513-1569	NonDomCDR	53.9286	-1.73393	66.1474	-0.257846	0
ENSP00000427089-2041-2100	NonDomCDR	61.1864	-1.22542	59.9633	-0.10423	4.5
ENSP00000427089-825-886	DomCDR	60.8197	-0.97541	68.279	0.0322274	1.45161
ENSP00000427089-1585-1646	NonDomCDR	62.2951	-0.914754	61.8516	-0.0294984	0
ENSP00000427089-1190-1252	NonDomCDR	17.4194	-1.35968	100.073	-0.0633984	0
ENSP00000427089-237-307	NonDomCDR	33.5714	-1.29571	48.4873	-0.0487127	17.3239
ENSP00000427089-1398-1480	NonDomCDR	50	-0.891463	94.1337	-0.0554145	1.08434
ENSP00000427089-1866-1952	DomCDR	56.8605	-1.3907	58.8402	-0.191551	0
ENSP00000427089-1285-1385	DomCDR	54.7	-0.869	68.7139	-0.0347208	2.07921
ENSP00000427089-2655-2843	DomCDR	51.2234	-1.02713	61.5116	-0.0224116	3.49206
ENSP00000427089-1654-1845	DomCDR	53.6649	-1.17277	46.5203	-0.114907	0.15625
ENSP00000366783-1915-1950	NonDomCDR	47.4286	-1.29429	28.0528	-0.241036	0
ENSP00000366783-3782-3822	DomCDR	43.75	-1.7375	51.478	-0.337776	0
ENSP00000366783-3436-3481	NonDomCDR	45.5556	-0.937778	49.9022	-0.154911	0
ENSP00000366783-3274-3340	NonDomCDR	47.2727	-0.945455	97.9403	-0.049903	0
ENSP00000371923-103-157	NonDomCDR	59.6296	-1.29074	56.6018	-0.0837327	0
ENSP00000371923-1186-1251	NonDomCDR	46.4615	-0.693846	39.3212	0.0459621	0
ENSP00000371923-221-320	NonDomCDR	38.4848	-1.20909	66.621	-0.07544	0
ENSP00000371923-445-620	NonDomCDR	47.0286	-0.813714	67.8517	-0.044671	0
ENSP00000371923-858-1074	NonDomCDR	46.2037	-0.914815	80.3479	-0.0614415	0
ENSP00000371923-622-851	NonDomCDR	41.3974	-0.89607	83.3287	0.0354648	0
ENSP00000371923-1268-1507	NonDomCDR	50.2929	-1.26653	82.3637	-0.20459	0
ENSP00000371923-1667-2400	NonDomCDR	39.2087	-1.3131	67.9376	-0.240594	0
ENSP00000394167-1-33	NonDomCDR	42.8125	-1.45312	57.4636	-0.168924	0
ENSP00000394167-65-97	NonDomCDR	27.5	-1.79375	35.7515	-0.00279697	0
ENSP00000488984-1-111	DomCDR	52.4545	-1.11273	81.1874	-0.194113	0
ENSP00000489147-1038-1074	NonDomCDR	103.056	-0.191667	79.9622	0.0995514	0
ENSP00000489147-1626-1664	NonDomCDR	43.6842	-0.915789	146.638	0.0156615	1.53846
ENSP00000489147-1475-1524	NonDomCDR	89.3878	-0.765306	73.564	-0.036286	0
ENSP00000489147-1544-1604	NonDomCDR	58.6667	-0.421667	70.8557	0.0569525	0
ENSP00000489147-1103-1199	NonDomCDR	73.3333	-0.644792	86.8278	0.00807732	0.618557
ENSP00000489147-345-469	NonDomCDR	59.2742	-0.999194	90.568	-0.0595024	0
ENSP00000489147-1205-1462	NonDomCDR	65.0584	-0.49572	72.3531	-0.00188682	0.232558
ENSP00000489147-713-1023	NonDomCDR	57.4839	-0.800323	75.2807	-0.0120752	0
ENSP00000481524-234-330	NonDomCDR	37.8125	-0.846875	79.3546	-0.0455289	0
ENSP00000261461-26-61	NonDomCDR	47.4286	-1.70286	80.7361	-0.126656	10
ENSP00000349723-92-124	NonDomCDR	79.0625	-0.95	97.3394	-0.0924	0
ENSP00000349723-650-685	NonDomCDR	56	-0.237143	69.2028	0.065725	1.66667
ENSP00000349723-300-345	NonDomCDR	56.4444	-0.791111	45.1674	0.0905348	0
ENSP00000349723-732-793	NonDomCDR	36.8852	-0.932787	66.2323	-0.00243226	0.967742
ENSP00000349723-356-430	NonDomCDR	44.8649	-0.825676	108.611	0.049612	2
ENSP00000349723-468-587	NonDomCDR	50.1681	-1.10672	87.4183	-0.125635	1
[truncated: 20,609 more rows]

## Sheet: Table S2
Table S2 The classification of proteins and their dN/dS, gene age, functional constraint, PSDR data (The data used in figure 1 and figure 3 and figure S1)
Protein_stable_ID	gene_symbol	Type	dN/dS	dN/dS_grade	RVIS_ExAc_score	RVIS_ExAc_percentile	pLI_score	pLI_percentile	s_het	s_het_percentile	PSDR
ENSP00000000233	ARF5	NoCDRP	noVariation	dNdS:VII_0_0	-0.12742	40.2327	0.234001	37.6	0.032419	38.2	1.66667
ENSP00000000412	M6PR	NoCDRP	noVariation	dNdS:VII_0_0	-0.35715	26.4687	0.713026	24.3	0.064122	25.2	4.69314
ENSP00000001008	FKBP4	NonDomCDRP	0.3125	dNdS:IV_(0.3,0.5]	0.211475	65.1849	0.927473	16.3	0.072518	23.3	16.3399
ENSP00000001146	CYP26B1	NoCDRP	0.0458	dNdS:II_(0,0.15]	0.627167	84.98	0.954354	14.4	0.300858	2.9	0.195312
ENSP00000002125	NDUFAF7	NoCDRP	0.2075	dNdS:III_(0.15,0.3]	0.056782	53.8519	1.18e-11	94.2	0.003411	89.1	1.13379
ENSP00000002165	FUCA2	NoCDRP	0.7817	dNdS:V_(0.5,1]	0.226481	66.0647	0.000366	68	0.007646	72.1	0
ENSP00000002596	HS3ST1	NoCDRP	0.068	dNdS:II_(0,0.15]	-0.38987	24.958	0.006175	57.1	0.017576	51.4	4.23453
ENSP00000002829	SEMA3F	NonDomCDRP	0.4507	dNdS:IV_(0.3,0.5]	-0.90267	9.52133	0.999918	3.6	0.15858	13.2	14.7771
ENSP00000003084	CFTR	NoCDRP	0.2698	dNdS:III_(0.15,0.3]	1.21461	95.1901	2.96e-36	99.9			3.91892
ENSP00000003100	CYP51A1	NoCDRP	1.2069	dNdS:VI_>1	-0.33257	27.6148	9.86e-06	78.1	0.006718	75.3	0.392927
ENSP00000003302	USP28	DomCDRP	0.2245	dNdS:III_(0.15,0.3]	-1.52551	3.22973	0.031658	49.4	0.037149	35.5	18.5701
ENSP00000004103	TMEM176A	NoCDRP	0.4127	dNdS:IV_(0.3,0.5]	0.591266	83.8572	0.39981	32.8	0.009258	67.1	4.68085
ENSP00000004531	SLC7A2	NoCDRP	0.4382	dNdS:IV_(0.3,0.5]	-0.74304	12.7916	1.17e-08	88.7	0.007671	72	2.00573
ENSP00000004982		NoCDRP	0.3544	dNdS:IV_(0.3,0.5]							19.375
ENSP00000005178	PDK4	NoCDRP	0.0629	dNdS:II_(0,0.15]	0.121439	58.8297	4.55e-06	79.7	0.005641	79.5	0.243309
ENSP00000005226	USH1C	NonDomCDRP	0.3034	dNdS:IV_(0.3,0.5]	-0.10783	41.5929	2.72e-12	94.9			28.3648
ENSP00000005257	RALA	NoCDRP	noVariation	dNdS:VII_0_0	0.023597	51.3226	0.950372	14.7	0.306604	2.7	8.73786
ENSP00000005260	BAIAP2L1	NonDomCDRP	0.1293	dNdS:II_(0,0.15]	0.119676	58.7197	0.042774	47.9	0.015326	54.7	35.225
ENSP00000005284	CACNG3	NoCDRP	0.3458	dNdS:IV_(0.3,0.5]	-0.60762	16.5249	0.987801	10.4	0.245882	6.2	14.2857
ENSP00000005286	TMEM132A	D_nonD_CDRP	0.2924	dNdS:III_(0.15,0.3]	0.225179	65.9432	2.89e-06	80.6	0.010692	63.7	36.8164
ENSP00000005340	DVL2	D_nonD_CDRP	noVariation	dNdS:VII_0_0	-0.13432	39.7812	0.011361	54.4	0.026358	42.5	53.125
ENSP00000005386	RPAP3	NonDomCDRP	0.3846	dNdS:IV_(0.3,0.5]	-0.44975	22.3013	0.14031	41.1	0.034647	36.9	29.9248
ENSP00000005587	SKAP2	NonDomCDRP	0.1129	dNdS:II_(0,0.15]	0.281722	69.4102	0.909797	17.3	0.047361	31	29.2479
ENSP00000005995	PRSS21	NoCDRP	0.4135	dNdS:IV_(0.3,0.5]	0.025662	51.4846	3.27e-07	84.4	0.009062	67.6	0
ENSP00000006015	HOXA11	NonDomCDRP	noVariation	dNdS:VII_0_0	0.227288	66.0936	0.863825	19.3	0.252931	5.6	39.9361
ENSP00000006275	TRAPPC6A	NoCDRP	0.3435	dNdS:IV_(0.3,0.5]	0.695357	86.7917	0.000705	65.9	0.006	78.1	7.51445
ENSP00000006526	WDR54	NoCDRP	0.8529	dNdS:V_(0.5,1]	0.210518	65.1097	2.4e-06	80.9	0.010256	64.7	0
ENSP00000006658	SPATA20	NonDomCDRP	0.4263	dNdS:IV_(0.3,0.5]	0.307558	70.8977	1.11e-05	77.8	0.002529	92.8	10.9726
ENSP00000006777	RHBDD2	NonDomCDRP	noVariation	dNdS:VII_0_0	-0.46586	21.6299	0.646227	26.1	0.089924	20.3	22.5275
ENSP00000007264	RPUSD1	NonDomCDRP	0.0871	dNdS:II_(0,0.15]	-0.11211	41.3556	3.06e-08	87.6	0.002334	93.8	20.1923
ENSP00000007390	TSR3	NonDomCDRP	0.2198	dNdS:III_(0.15,0.3]	-0.20789	35.064	0.002408	61.2	0.013221	58.2	41.9872
ENSP00000007414	OSBPL7	NonDomCDRP	0.1852	dNdS:III_(0.15,0.3]	-0.64564	15.5235	0.181605	39.3	0.021486	47.1	29.3349
ENSP00000007516	NDUFAB1	NoCDRP	noVariation	dNdS:VII_0_0	0.033971	52.1503	0.755255	23	0.189733	11.4	0
ENSP00000007699	YBX2	D_nonD_CDRP	0.4741	dNdS:IV_(0.3,0.5]	0.160717	61.8163	0.968726	13.1	0.09841	19	88.7363
ENSP00000007722	ITGA3	DomCDRP	0.3636	dNdS:IV_(0.3,0.5]	-0.08452	43.2309	2.41e-05	75.8	0.02046	48.2	5.4409
ENSP00000007735	KRT33A	NoCDRP	0.1292	dNdS:II_(0,0.15]	0.431128	77.4729	2.04e-11	93.9	0.002346	93.7	2.47525
ENSP00000008391	TFAP2D	NonDomCDRP	noVariation	dNdS:VII_0_0	-0.62997	15.8824	0.981587	11.5	0.213086	9.2	18.8053
ENSP00000008527	CRY1	NonDomCDRP	0.1698	dNdS:III_(0.15,0.3]	-0.96858	8.40424	4.24e-07	84	0.01532	54.7	9.21502
ENSP00000008938	PGLYRP1	NoCDRP	0.9294	dNdS:V_(0.5,1]	0.263846	68.3105	0.167201	39.9	0.035192	36.6	0
ENSP00000009105	CAMK1G	NonDomCDRP	0.0415	dNdS:II_(0,0.15]	-0.04458	46.258	0.101614	43	0.030885	39.2	10.084
ENSP00000009180	CD9	NoCDRP	0.1367	dNdS:II_(0,0.15]	0.014332	50.5701	0.147689	40.7	0.020512	48.1	0
ENSP00000010299	FAM76A	NoCDRP	noVariation	dNdS:VII_0_0	0.119375	58.6907	0.000561	66.7	0.012398	59.8	34.0176
ENSP00000010404	MGST1	NoCDRP	noVariation	dNdS:VII_0_0	0.125921	59.2059	0.014029	53.5			0
ENSP00000011292	CPA1	NoCDRP	0.0953	dNdS:II_(0,0.15]	0.508878	80.8126	1.1e-05	77.8	0.001838	95.8	0
ENSP00000011473	SYPL1	NoCDRP	0.0952	dNdS:II_(0,0.15]	0.172853	62.725	0.289132	36	0.036499	35.9	6.17761
ENSP00000011619	RANBP9	D_nonD_CDRP	0.3837	dNdS:IV_(0.3,0.5]	-0.64402	15.5756	0.999958	3.2	0.398173	1	44.1701
ENSP00000011653	CD4	NoCDRP	0.5856	dNdS:V_(0.5,1]	0.886914	90.8896	0.001507	63	0.01568	54.1	4.58515
ENSP00000011684	PLEKHG6	NonDomCDRP	0.0978	dNdS:II_(0,0.15]	0.072897	55.1253	1.17e-10	92.9	0.006196	77.4	46.962
ENSP00000011989	CYP4F2	NoCDRP	0.068	dNdS:II_(0,0.15]	1.40035	96.3825	3.52e-11	93.6	0.003642	88	0.961538
ENSP00000012049	QPCTL	NoCDRP	0.1188	dNdS:II_(0,0.15]	0.272456	68.8256	0.000262	69	0.00959	66.3	1.57068
ENSP00000012443	PPP5C	NoCDRP	0.0254	dNdS:II_(0,0.15]	-0.69191	14.1923	0.999093	5.8	0.321052	2.4	9.01804
ENSP00000013034	NME1	NoCDRP	0.3085	dNdS:IV_(0.3,0.5]	0.762888	88.3718	0.007774	56.1	0.01132	62	2.25989
ENSP00000013070	UBR7	NonDomCDRP	noVariation	dNdS:VII_0_0	-0.0607	45.0425	0.426812	32.1	0.024184	44.4	13.6471
ENSP00000013125		NonDomCDRP	0.1089	dNdS:II_(0,0.15]							22.9314
ENSP00000013222	INMT	NoCDRP	0.5699	dNdS:V_(0.5,1]	1.05854	93.4711	0.00012	71.3			0
ENSP00000013807	ERCC1	NonDomCDRP	0.3412	dNdS:IV_(0.3,0.5]	0.042582	52.7696	0.000287	68.8	0.007734	71.8	37.4613
ENSP00000014914	GPRC5A	NoCDRP	0.4295	dNdS:IV_(0.3,0.5]	0.599873	84.1176	8.03e-06	78.6	0.009089	67.5	0.560224
ENSP00000014930	HEBP1	NoCDRP	noVariation	dNdS:VII_0_0	0.2573	67.8648	8.07e-05	72.5	0.003149	90.4	5.82011
ENSP00000016171	COX15	NoCDRP	noVariation	dNdS:VII_0_0	0.197425	64.2299	2.16e-09	90.4	0.002863	91.5	0
ENSP00000016913	MS4A12	NoCDRP	3.5286	dNdS:VI_>1	0.789222	88.9738	4.96e-05	73.9			8.61423
ENSP00000016946		NonDomCDRP	noHomolog	dNdS:VIIII_noHomolog							21.6431
ENSP00000017003	XYLT2	NonDomCDRP	0.4021	dNdS:IV_(0.3,0.5]	-0.47865	21.0569	0.337134	34.7	0.04273	32.9	19.8844
ENSP00000019103	SCTR	NoCDRP	0.2857	dNdS:III_(0.15,0.3]	0.760312	88.3197	1.96e-09	90.5	0.002451	93.1	2.04545
ENSP00000020926	SYT13	NoCDRP	0.0667	dNdS:II_(0,0.15]	-0.52956	19.0369	0.220166	38	0.02556	43.2	15.493
ENSP00000020945	SNAI2	NonDomCDRP	noVariation	dNdS:VII_0_0	-0.20708	35.0929	0.87169	19	0.268392	4.6	14.9254
ENSP00000023939	RTFDC1	DomCDRP	0.1456	dNdS:II_(0,0.15]	0.068767	54.778	0.003932	59.1	0.016914	52.4	38.3929
ENSP00000025008	RB1CC1	D_nonD_CDRP	0.2632	dNdS:III_(0.15,0.3]	-2.08177	1.48174	1	1.3	0.221885	8.4	19.8871
ENSP00000025301	AKAP11	NonDomCDRP	0.7838	dNdS:V_(0.5,1]	-0.11393	41.2109	0.896373	17.9	0.064619	25.1	25.9863
ENSP00000025399	STRAP	NoCDRP	noVariation	dNdS:VII_0_0	-0.30462	29.218	0.70183	24.6	0.075641	22.7	9.91736
ENSP00000026218	PIGQ	NonDomCDRP	0.5997	dNdS:V_(0.5,1]	1.54406	97.2044	3.39e-10	92.1	0.002052	94.9	10.9211
ENSP00000029410	B4GALT7	NoCDRP	0.3582	dNdS:IV_(0.3,0.5]	-0.478	21.0974	0.003197	60	0.010465	64.2	8.8685
ENSP00000033079	FAM13B	D_nonD_CDRP	0.2273	dNdS:III_(0.15,0.3]	-1.03214	7.44342	0.900072	17.8	0.057846	27.1	34.7541
ENSP00000035307	CHPF2	DomCDRP	0.1237	dNdS:II_(0,0.15]	0.932404	91.7752	7.24e-17	97.7	0.002371	93.6	8.93782
ENSP00000035383	LRRC7	NonDomCDRP	noVariation	dNdS:VII_0_0	-2.13156	1.40071	0.999999	1.8	0.15016	13.6	57.905
ENSP00000037243	GABARAPL2	NoCDRP	noVariation	dNdS:VII_0_0	0.107088	57.7184	0.000743	65.7	0.008353	69.8	0
ENSP00000037502	MYOC	DomCDRP	0.26	dNdS:III_(0.15,0.3]	0.98174	92.5276	5.02e-08	87			23.8095
ENSP00000039007	OTC	NoCDRP	0.4359	dNdS:IV_(0.3,0.5]	0.240381	66.8982	0.981018	11.6	0.216321	8.9	0.282486
ENSP00000039989	TTC17	NoCDRP	0.6923	dNdS:V_(0.5,1]	-1.35564	4.25421	0.999728	4.5	0.133289	14.8	13.5846
ENSP00000040584	HOXC8	NonDomCDRP	0.3882	dNdS:IV_(0.3,0.5]	-0.03723	46.7905	0.392361	33	0.054154	28.2	35.5372
ENSP00000040663	MRI1	NoCDRP	0.4596	dNdS:IV_(0.3,0.5]	0.906556	91.2138	0.000533	66.9	0.004076	85.9	4.60705
ENSP00000040738	BOD1L1	D_nonD_CDRP	0.4157	dNdS:IV_(0.3,0.5]	0.526689	81.4956	0.999528	5.1	0.061818	25.8	91.6093
ENSP00000040877	TARBP1	NoCDRP	0.3718	dNdS:IV_(0.3,0.5]	-0.08422	43.2367	5.7e-16	97.4	0.007475	72.7	2.65268
ENSP00000042931	BEST2	NonDomCDRP	0.0415	dNdS:II_(0,0.15]	-0.53994	18.5796	9.02e-11	93	0.006218	77.3	13.9489
ENSP00000046087	ZPBP	NoCDRP	0.2723	dNdS:III_(0.15,0.3]	-0.0888	42.9125	0.159636	40.2	0.01944	49.3	0
ENSP00000052754	DCN	NoCDRP	noVariation	dNdS:VII_0_0	-0.38429	25.2127	0.457566	31.2	0.04295	32.8	5.29248
ENSP00000053243	TNFRSF17	NoCDRP	200	dNdS:VI_>1	0.364256	74.1043	0.003104	60.2	0.011228	62.3	0
ENSP00000053468	MRPS10	NoCDRP	0.3056	dNdS:IV_(0.3,0.5]	0.429872	77.3977	0.028212	50	0.023056	45.5	2.98507
ENSP00000053867	GRN	NoCDRP	0.2523	dNdS:III_(0.15,0.3]	-0.39148	24.9002	0.060278	46	0.033492	37.6	2.36088
ENSP00000054650	THAP3	NonDomCDRP	0.3434	dNdS:IV_(0.3,0.5]	0.554705	82.6012	0.001484	63.1	0.00203	95.1	63.1799
ENSP00000054666	VAMP3	NoCDRP	noVariation	dNdS:VII_0_0	-0.11896	40.8231	0.054263	46.5	0.022315	46.2	15
ENSP00000054668	UTS2	NoCDRP	0.8567	dNdS:V_(0.5,1]	0.747881	88.0361	0.151041	40.5	0.024879	43.7	0
ENSP00000054950	RCN1	NoCDRP	0.6899	dNdS:V_(0.5,1]	0.667255	86.1376	0.016339	52.7	0.013757	57.4	23.565
ENSP00000055077	RFC2	NoCDRP	0.0651	dNdS:II_(0,0.15]	-0.48933	20.6228	4.04e-05	74.5	0.004117	85.8	5.36723
ENSP00000055335	PPP1R3F	D_nonD_CDRP	noHomolog	dNdS:VIIII_noHomolog	0.318431	71.6675	0.004749	58.3			64.2053
ENSP00000056217		D_nonD_CDRP	0.4722	dNdS:IV_(0.3,0.5]							68.0651
ENSP00000056233	NFE2L3	NonDomCDRP	0.5417	dNdS:V_(0.5,1]	0.486675	79.9502	1.1e-07	86	0.006912	74.6	47.1182
ENSP00000062104	NNAT	NoCDRP	noVariation	dNdS:VII_0_0	0.144604	60.5661	0.112568	42.5	0.026546	42.4	2.46914
ENSP00000064571	CBLN4	NoCDRP	noVariation	dNdS:VII_0_0	-0.27748	30.775	0.348292	34.2	0.046189	31.4	0.497512
ENSP00000064724	CLDN11	NoCDRP	0.0959	dNdS:II_(0,0.15]	-0.14051	39.3818	0.328912	34.9	0.056476	27.5	0
ENSP00000064778	FAM168A	NoCDRP	noVariation	dNdS:VII_0_0	-0.4491	22.3361	0.951668	14.6	0.299227	3	24.1803
ENSP00000070846	PKP2	NonDomCDRP	0.22	dNdS:III_(0.15,0.3]	0.720391	87.4515	6.14e-10	91.6	0.005552	79.9	30.193
ENSP00000071281	FHL1	NoCDRP	noHomolog	dNdS:VIIII_noHomolog	0.051847	53.5047	0.918481	16.8	0.262571	5	7.43034
ENSP00000072644	YIPF1	NonDomCDRP	0.5152	dNdS:V_(0.5,1]	0.283635	69.5202	0.017379	52.3			16.3399
ENSP00000072869	ADCK2	NoCDRP	0.7922	dNdS:V_(0.5,1]	0.551178	82.4912	0.000169	70.3			0.319489
ENSP00000074304	INPP4A	NoCDRP	0.051	dNdS:II_(0,0.15]	-1.07349	6.88198	0.994886	8.5	0.03278	38	6.2436
ENSP00000075120	SLC2A3	NoCDRP	0.1959	dNdS:III_(0.15,0.3]	0.345723	73.1724	0.519823	29.5	0.031668	38.7	3.42742
ENSP00000075503	STYK1	NoCDRP	0.3465	dNdS:IV_(0.3,0.5]	0.318431	71.6675	1.54e-05	77	0.008737	68.5	4.50237
ENSP00000078429	GNA11	NoCDRP	0.0534	dNdS:II_(0,0.15]	-0.39929	24.4834	0.966183	13.4	0.305442	2.7	0.835655
ENSP00000078445	CREB3L3	NonDomCDRP	0.249	dNdS:III_(0.15,0.3]	0.568098	83.0005	1.59e-09	90.7	0.004515	84	50.1085
ENSP00000078527	PIGV	NoCDRP	noHomolog	dNdS:VIIII_noHomolog	-0.43761	22.8628	7.2e-06	78.9	0.005993	78.1	0
ENSP00000081029	MRPS35	NoCDRP	0.4512	dNdS:IV_(0.3,0.5]	0.071637	55.0211	0.040928	48.2	0.022269	46.2	13.0031
ENSP00000083182	APPBP2	NoCDRP	200	dNdS:VI_>1	-0.40584	24.1072	0.999071	5.8	0.19451	11	0.512821
ENSP00000084795	RPL18	DomCDRP	noVariation	dNdS:VII_0_0	-0.31213	28.7955	0.554781	28.5	0.196586	10.7	37.8947
ENSP00000084798	CA11	NoCDRP	noVariation	dNdS:VII_0_0	-0.22113	34.271	0.976097	12.2	0.122286	15.7	10.3659
ENSP00000085068	ISOC2	NoCDRP	0.6402	dNdS:V_(0.5,1]	0.273263	68.8603	0.043319	47.8	0.020422	48.2	0.904977
ENSP00000085219	CD22	NoCDRP	0.7908	dNdS:V_(0.5,1]	-0.10798	41.5871	0.03085	49.5	0.026341	42.5	11.6883
ENSP00000086933		NoCDRP	noHomolog	dNdS:VIIII_noHomolog							38.0488
ENSP00000155093		NoCDRP	0.5949	dNdS:V_(0.5,1]							24.3446
ENSP00000155840	KCNQ1	NonDomCDRP	noHomolog	dNdS:VIIII_noHomolog	-0.92628	9.12774	2.45e-05	75.7	0.004527	83.9	18.0473
ENSP00000155926	TRIB2	NoCDRP	200	dNdS:VI_>1	-0.31676	28.4714	0.926787	16.3	0.300862	2.9	4.37318
ENSP00000156084	OTUD5	NonDomCDRP	0.1978	dNdS:III_(0.15,0.3]	-0.18649	36.3663	0.976549	12.2	0.217829	8.8	58.3187
ENSP00000156109	GPKOW	NonDomCDRP	noHomolog	dNdS:VIIII_noHomolog	0.382132	75.0246	0.979573	11.8	0.211544	9.4	57.1429
ENSP00000156471	AQR	NonDomCDRP	0.0636	dNdS:II_(0,0.15]	-1.69717	2.46571	0.999999	1.8	0.077163	22.4	13.266
ENSP00000156499	KLK14	NoCDRP	noHomolog	dNdS:VIIII_noHomolog	1.06127	93.5058	1.1e-09	91.1			2.99625
ENSP00000156626	ST6GALNAC1	NonDomCDRP	0.284	dNdS:III_(0.15,0.3]	0.192945	64.0157	2.24e-11	93.8	0.003801	87.3	37.3333
ENSP00000157600	LMCD1	NonDomCDRP	0.0988	dNdS:II_(0,0.15]	0.582953	83.6141	0.376044	33.5	0.02287	45.7	11.7808
ENSP00000157812	PSMC4	NoCDRP	noVariation	dNdS:VII_0_0	-0.80175	11.524	0.605977	27.3	0.046943	31.2	0.717703
ENSP00000158009	FNDC8	NoCDRP	0.2174	dNdS:III_(0.15,0.3]	0.163587	62.0594	1.9e-05	76.4	0.001303	97.8	23.1481
ENSP00000158762	ACAP1	NonDomCDRP	0.3512	dNdS:IV_(0.3,0.5]	0.074659	55.2469	0.237756	37.5	0.024669	43.9	20.8108
ENSP00000158771	DERL2	NoCDRP	noVariation	dNdS:VII_0_0	-0.26807	31.3596	0.93296	15.9	0.100575	18.6	2.92887
ENSP00000159060	NOX3	NoCDRP	0.276	dNdS:III_(0.15,0.3]	0.170436	62.5398	3.58e-09	89.9	0.002217	94.2	0.176056
ENSP00000159087	ANO8	D_nonD_CDRP	0.1706	dNdS:III_(0.15,0.3]	-1.04811	7.24084	0.992936	9.2	0.079389	22.1	47.7273
ENSP00000160262	ICAM3	NoCDRP	1.2075	dNdS:VI_>1	0.38052	74.9436	2.08e-22	99.1	0.002691	92.2	11.1517
ENSP00000160373	CTTNBP2	D_nonD_CDRP	0.5217	dNdS:V_(0.5,1]	-1.06819	6.94565	2.6e-06	80.8	0.020241	48.5	41.371
ENSP00000160382	ACTL6B	NoCDRP	noVariation	dNdS:VII_0_0	-0.68074	14.4817	0.987131	10.6	0.07065	23.8	6.10329
ENSP00000160827	KIF22	NonDomCDRP	0.2612	dNdS:III_(0.15,0.3]	-0.45901	21.9251	4.4e-06	79.8	0.020605	48	29.1729
ENSP00000161006	PRSS22	NoCDRP	0.3819	dNdS:IV_(0.3,0.5]	-0.17883	36.8004	0.015476	53	0.015487	54.5	5.04732
ENSP00000161559	CEACAM1	DomCDRP	0.5621	dNdS:V_(0.5,1]	0.716249	87.3126	0.6584	25.8	0.049428	30.2	28.8973
ENSP00000161863	YTHDC2	NonDomCDRP	0.1579	dNdS:III_(0.15,0.3]	-1.18374	5.74174	1	1.4	0.135908	14.6	20.2098
ENSP00000162044	TMEM161A	NoCDRP	0.2209	dNdS:III_(0.15,0.3]	-0.18346	36.5399	2.05e-06	81.3	0.004257	85.1	1.46138
ENSP00000162391	FOXJ2	NonDomCDRP	0.75	dNdS:V_(0.5,1]	-0.32874	27.7884	0.998395	6.6	0.194581	11	76.1324
ENSP00000162749	TNFRSF1A	NoCDRP	0.5875	dNdS:V_(0.5,1]	0.003153	49.7193	0.985476	10.9	0.21262	9.2	12.3077
ENSP00000163416	GOLGA5	D_nonD_CDRP	0.1988	dNdS:III_(0.15,0.3]	0.002499	49.673	0.363134	33.8	0.0494	30.2	59.7811
ENSP00000164024	CELSR3	D_nonD_CDRP	0.3854	dNdS:IV_(0.3,0.5]	-1.54154	3.13133	0.999656	4.8	0.052716	28.9	29.4686
ENSP00000164133	PPP2R5B	NonDomCDRP	0.2533	dNdS:III_(0.15,0.3]	-0.67882	14.5222	0.932459	15.9	0.073421	23.2	17.505
ENSP00000164139	PYGM	NoCDRP	0.1556	dNdS:III_(0.15,0.3]	-0.11357	41.2282	2.62e-08	87.8			1.54394
ENSP00000164227	BCL3	NonDomCDRP	0.6812	dNdS:V_(0.5,1]	0.297685	70.3826	0.862173	19.4	0.094707	19.6	40.9692
ENSP00000165524	PRLH	NoCDRP	noHomolog	dNdS:VIIII_noHomolog	0.130554	59.449	0.040171	48.3	0.000294	100	5.74713
ENSP00000166139		NoCDRP	0.1711	dNdS:III_(0.15,0.3]							8.36502
ENSP00000166244	EPHA8	NoCDRP	0.1006	dNdS:II_(0,0.15]	-0.30755	29.0039	1.14e-08	88.8	0.008332	69.8	5.47264
ENSP00000166345	TRIP13	NoCDRP	0.1231	dNdS:II_(0,0.15]	-0.56436	17.7924	0.968635	13.2	0.08155	21.6	2.5463
ENSP00000166534	P4HA2	NoCDRP	0.1579	dNdS:III_(0.15,0.3]	-0.32874	27.7884	6.46e-05	73.2	0.002609	92.6	2.61682
ENSP00000167106	VASH1	NonDomCDRP	0.1542	dNdS:III_(0.15,0.3]	-0.32713	27.8868	0.730608	23.7	0.082438	21.5	43.8356
ENSP00000167586	KRT14	NoCDRP	0.0488	dNdS:II_(0,0.15]	-0.52956	19.0369	0.067343	45.3	0.010577	64	14.4068
ENSP00000167588	KRT20	NoCDRP	0.3679	dNdS:IV_(0.3,0.5]	-0.17309	37.1766	5.58e-06	79.3	0.008563	69.1	9.43396
ENSP00000168148	SPP2	NoCDRP	1.3651	dNdS:VI_>1	0.190729	63.8305	1.27e-06	82.2	0.003743	87.6	6.16114
ENSP00000168216	HSD17B10	NoCDRP	noVariation	dNdS:VII_0_0	0.06207	54.2976	0.88687	18.3	0.173118	12.5	2.68199
ENSP00000168712		NoCDRP	0.3714	dNdS:IV_(0.3,0.5]					0.232355	7.4	3.39806
ENSP00000169298	ST6GAL1	NoCDRP	0.0847	dNdS:II_(0,0.15]	-0.08688	43.0688	0.814436	21.1	0.106373	17.7	4.92611
ENSP00000169551	TIMM21	NoCDRP	0.3186	dNdS:IV_(0.3,0.5]	0.153214	61.2433	0.005321	57.8	0.019426	49.3	17.7419
ENSP00000170150	BPIFB2	NoCDRP	0.2793	dNdS:III_(0.15,0.3]	0.239724	66.8635	7.69e-08	86.4	0.006869	74.8	0
ENSP00000170168	REXO1	NonDomCDRP	0.4985	dNdS:IV_(0.3,0.5]	0.56586	82.8963	0.567928	28.3	0.04421	32.3	62.7355
ENSP00000170447	MKRN2	NonDomCDRP	0.1176	dNdS:II_(0,0.15]	-0.21252	34.7919	0.407629	32.6	0.042519	33	24.7596
ENSP00000170564	GPATCH1	NonDomCDRP	0.4797	dNdS:IV_(0.3,0.5]	-0.08643	43.0804	3.44e-05	74.9	0.009125	67.4	63.3727
ENSP00000171111	KEAP1	NoCDRP	noVariation	dNdS:VII_0_0	-0.93011	9.04092	0.251629	37.1	0.04123	33.6	2.88462
ENSP00000171887	TNS1	NonDomCDRP	0.134	dNdS:II_(0,0.15]	1.30026	95.7979	0.92494	16.4	0.008531	69.2	65.8213
ENSP00000172229	NGFR	NonDomCDRP	0.086	dNdS:II_(0,0.15]	-0.36545	26.1156	0.238222	37.4	0.037599	35.4	27.6347
ENSP00000173229		NoCDRP	0.0349	dNdS:II_(0,0.15]							4.80132
ENSP00000173527	ISOC1	NoCDRP	noVariation	dNdS:VII_0_0	-0.56723	17.723	0.005293	57.9	0.008749	68.5	0
ENSP00000173898	TRO	NonDomCDRP	noHomolog	dNdS:VIIII_noHomolog	0.602095	84.1697	0.00167	62.6	0.014272	56.4	27.1139
ENSP00000174618	MNT	NonDomCDRP	0.4011	dNdS:IV_(0.3,0.5]	-0.89259	9.7297	0.96048	13.9	0.19244	11.1	82.8179
ENSP00000175091	LAPTM4A	NoCDRP	noVariation	dNdS:VII_0_0	0.097822	56.9833	0.503802	29.8	0.030108	39.8	0.429185
ENSP00000175506	ASNS	NoCDRP	0.0726	dNdS:II_(0,0.15]	-0.71906	13.4398	0.001666	62.6	0.015377	54.6	0
ENSP00000175756	PTPN18	NonDomCDRP	1.6286	dNdS:VI_>1	0.250903	67.5059	6.52e-07	83.3	0.011607	61.3	25.6522
ENSP00000176183		DomCDRP	noHomolog	dNdS:VIIII_noHomolog							16.7064
ENSP00000176195		NoCDRP	0.188	dNdS:III_(0.15,0.3]							43.8017
ENSP00000176763	STK10	D_nonD_CDRP	0.2932	dNdS:III_(0.15,0.3]	-0.4991	20.2176	1.5e-07	85.6	0.008631	68.9	51.8595
ENSP00000177648	ALPK1	NonDomCDRP	0.9231	dNdS:V_(0.5,1]	0.983351	92.5739	1e-07	86.1			30.1447
ENSP00000177694	TBX21	D_nonD_CDRP	noVariation	dNdS:VII_0_0	-0.20038	35.4691	0.963243	13.7	0.134621	14.7	42.0561
ENSP00000177742	MRPS34	NoCDRP	noVariation	dNdS:VII_0_0	0.140927	60.2651	5.52e-05	73.7	0.003382	89.3	21.3333
ENSP00000178638	CA12	NoCDRP	0.0688	dNdS:II_(0,0.15]	0.135488	59.8773	9.91e-09	88.9	0.001184	98.2	6.49718
ENSP00000178640	MAP2K5	NoCDRP	noVariation	dNdS:VII_0_0	-0.64131	15.6509	0.475918	30.7	0.0265	42.4	11.1607
ENSP00000179259		NoCDRP	1.3171	dNdS:VI_>1							2.22222
ENSP00000180166	FGF20	NoCDRP	noVariation	dNdS:VII_0_0	0.27694	69.1092	0.702855	24.5	0.192585	11.1	10.4265
ENSP00000180173	MTMR7	NonDomCDRP	0.6518	dNdS:V_(0.5,1]	-1.5528	3.06187	1.64e-09	90.7	0.009233	67.1	19.5455
ENSP00000181383	CPB2	NoCDRP	0.7458	dNdS:V_(0.5,1]	-0.32043	28.2919	2.81e-06	80.6	0.004307	84.9	0
ENSP00000181796	FAM107B	D_nonD_CDRP	0.2353	dNdS:III_(0.15,0.3]	-0.43489	22.9727	0.000196	69.9	0.008839	68.3	88.5621
ENSP00000181839	CDK13	NonDomCDRP	0.1887	dNdS:III_(0.15,0.3]	-0.95041	8.70521	0.751251	23.1	0.046122	31.5	68.3201
ENSP00000182290	TSPAN32	NoCDRP	noHomolog	dNdS:VIIII_noHomolog	1.07818	93.7142	0.000537	66.8	0.001534	97	0.3125
ENSP00000182377	FAR2	NoCDRP	0.2597	dNdS:III_(0.15,0.3]	-0.14499	39.0635	0.922174	16.6	0.128461	15.2	0
ENSP00000182527	TRAM2	NoCDRP	0.25	dNdS:III_(0.15,0.3]	-0.12535	40.4353	0.995358	8.3	0.247312	6.2	4.32432
ENSP00000184266	NDUFB4	NoCDRP	noVariation	dNdS:VII_0_0	0.018965	50.9753	0.002266	61.5	0.003405	89.1	3.10078
ENSP00000184956	HEATR6	NonDomCDRP	0.3802	dNdS:IV_(0.3,0.5]	-0.61916	16.2007	4.94e-10	91.8	0.004775	82.9	12.0237
ENSP00000185150	ERLEC1	NoCDRP	0.0714	dNdS:II_(0,0.15]	-0.01553	48.2491	0.000679	66.1	0.021078	47.5	10.559
ENSP00000185206	CLIC5	NonDomCDRP	0.2697	dNdS:III_(0.15,0.3]	0.828652	89.732	0.001877	62.1	0.009763	65.8	29.0244
ENSP00000186436	TMEM131	NonDomCDRP	0.2763	dNdS:III_(0.15,0.3]	-1.1349	6.18742	0.999999	1.5	0.075641	22.7	31.8109
ENSP00000187762	TMEM38A	NonDomCDRP	0.1514	dNdS:III_(0.15,0.3]	-0.14786	38.9014	0.03076	49.5	0.022211	46.3	13.7124
ENSP00000188312	ACTR6	NoCDRP	noVariation	dNdS:VII_0_0	-0.33272	27.5974	0.004686	58.4	0.013935	57	1.26263
ENSP00000188790	FAP	NoCDRP	noVariation	dNdS:VII_0_0	-1.02655	7.52445	3.27e-11	93.6	0.009351	66.8	0
ENSP00000190165	DMRT3	NonDomCDRP	0.3918	dNdS:IV_(0.3,0.5]	0.326085	72.0958	0.001373	63.5	0.014184	56.6	55.9322
ENSP00000192314	GAL3ST2	NoCDRP	0.279	dNdS:III_(0.15,0.3]	0.805185	89.2516	4.42e-05	74.2			0.753769
ENSP00000192788	UHRF1BP1	NonDomCDRP	0.4022	dNdS:IV_(0.3,0.5]	0.239385	66.8056	2.47e-07	84.8	0.009195	67.2	29.375
ENSP00000193322	OSTM1	NoCDRP	0.065	dNdS:II_(0,0.15]	-0.17611	36.9914	0.060471	45.9	0.025156	43.6	2.39521
ENSP00000193391	IMPG2	NonDomCDRP	0.25	dNdS:III_(0.15,0.3]	-1.04033	7.37975	1.47e-08	88.5	0.009972	65.4	17.6471
ENSP00000194130	SLC13A1	NoCDRP	0.7901	dNdS:V_(0.5,1]	0.181614	63.327	1.84e-09	90.6			3.86555
ENSP00000194152		NoCDRP	0.1398	dNdS:II_(0,0.15]							5.28302
ENSP00000194155		NoCDRP	0.3333	dNdS:IV_(0.3,0.5]							4.13534
ENSP00000194530	STRADB	NoCDRP	noHomolog	dNdS:VIIII_noHomolog	-0.02127	47.8497	0.669632	25.5	0.034931	36.7	5.98086
ENSP00000194900	DLG3	D_nonD_CDRP	0.3415	dNdS:IV_(0.3,0.5]	-0.58783	17.1558	0.999544	5.1	0.347709	1.8	24.1461
ENSP00000196061	PLOD1	NoCDRP	0.118	dNdS:II_(0,0.15]	0.336613	72.6573	2.7e-07	84.7	0.013493	57.9	0.137552
ENSP00000196371	OXCT1	NoCDRP	0.4667	dNdS:IV_(0.3,0.5]	-0.4424	22.6081	0.267383	36.6	0.02925	40.3	3.07692
ENSP00000196489	ZNF416	NoCDRP	0.2025	dNdS:III_(0.15,0.3]	-0.20965	34.9656	0.000574	66.6	0.013809	57.3	8.75421
ENSP00000198536	PILRA	NonDomCDRP	0.4643	dNdS:IV_(0.3,0.5]	-0.19288	36.0016	2.14e-08	88.1			29.3729
ENSP00000198767	RRN3	NoCDRP	0.1579	dNdS:III_(0.15,0.3]	0.382434	75.0477	0.000475	67.2	0.031252	39	8.14132
ENSP00000198801	MOGAT2	NoCDRP	0.0986	dNdS:II_(0,0.15]	0.499462	80.4422	0.218649	38.1	0.017062	52.2	0
ENSP00000198939	CHERP	D_nonD_CDRP	0.0193	dNdS:II_(0,0.15]	-1.08673	6.69676	0.999988	2.6	0.417121	0.7	68.3927
ENSP00000199280	AQP2	NoCDRP	0.0514	dNdS:II_(0,0.15]	-0.55781	17.9892	4.18e-06	79.9	0.004908	82.4	7.01107
ENSP00000199320	DIMT1	NoCDRP	noVariation	dNdS:VII_0_0	-0.18729	36.3026	1.47e-05	77.1	0.005762	79.1	8.94569
ENSP00000199389	EIF2AK1	D_nonD_CDRP	0.4444	dNdS:IV_(0.3,0.5]	-0.35588	26.5382	0.000121	71.3	0.012282	60	22.5397
ENSP00000199448	EPDR1	NoCDRP	0.4803	dNdS:IV_(0.3,0.5]	0.196319	64.1662	0.029388	49.8	0.020805	47.8	1.33929
ENSP00000199708		NoCDRP	noHomolog	dNdS:VIIII_noHomolog							0
ENSP00000199764	CEACAM6	NoCDRP	0.0936	dNdS:II_(0,0.15]	0.567947	82.9947	0.19111	39	0.011181	62.5	13.3721
ENSP00000199814	RBM22	NonDomCDRP	noVariation	dNdS:VII_0_0	-0.16765	37.5297	0.995946	8	0.239343	6.8	40.4762
ENSP00000199936	HSD17B2	NoCDRP	0.1304	dNdS:II_(0,0.15]	-0.38972	24.9696	3.83e-10	91.9	0.000988	98.8	0
ENSP00000200135	ZW10	NoCDRP	noVariation	dNdS:VII_0_0	-0.6335	15.8245	0.047263	47.3	0.029332	40.2	3.20924
ENSP00000200181	ITGB4	NonDomCDRP	0.0975	dNdS:II_(0,0.15]	-0.12578	40.3484	1.05e-11	94.2	0.01412	56.7	21.899
ENSP00000200453	PPP1R15A	NonDomCDRP	1.9123	dNdS:VI_>1	1.48577	96.8976	3.34e-09	90			87.5371
ENSP00000200457	TRIP6	NonDomCDRP	0.2703	dNdS:III_(0.15,0.3]	0.133726	59.7384	0.659398	25.8	0.020571	48	56.0924
ENSP00000200557	ADAM11	DomCDRP	0.1156	dNdS:II_(0,0.15]	-0.58576	17.2136	0.024736	50.5	0.027099	41.9	14.8244
ENSP00000200652	SLC22A4	NoCDRP	1.8261	dNdS:VI_>1	0.283786	69.5318	4.64e-06	79.7	0.003515	88.6	0.362976
ENSP00000200676	CETP	NoCDRP	0.3174	dNdS:IV_(0.3,0.5]	-0.06135	45.0078	5.18e-12	94.6	0.004898	82.5	0
ENSP00000201031	TFAP2C	NonDomCDRP	noVariation	dNdS:VII_0_0	-0.27078	31.2323	0.939951	15.6	0.106543	17.7	39.5556
ENSP00000201586	SULT2B1	NonDomCDRP	0.2322	dNdS:III_(0.15,0.3]	0.512555	80.9921	0.827919	20.7	0.088411	20.5	21.6438
ENSP00000201647	EPS8L1	NonDomCDRP	0.154	dNdS:III_(0.15,0.3]	0.38898	75.3	2.75e-08	87.8	0.008401	69.6	50.7607
ENSP00000201979	REM1	NonDomCDRP	0.1181	dNdS:II_(0,0.15]	0.791134	89.0027	1.68e-05	76.8	0.005714	79.2	35.5705
ENSP00000202017	PDRG1	NoCDRP	0.3254	dNdS:IV_(0.3,0.5]	0.366022	74.1448	0.001087	64.4	0.006476	76.3	14.2857
ENSP00000202556	PPP1R13B	NonDomCDRP	0.2755	dNdS:III_(0.15,0.3]	-1.38375	4.04584	0.976929	12.2	0.069801	23.9	64.4037
ENSP00000202625	TGM6	NoCDRP	0.2056	dNdS:III_(0.15,0.3]	3.07764	99.5659	2.76e-18	98.2			1.983
ENSP00000202677	RALGAPA2	NonDomCDRP	0.1622	dNdS:III_(0.15,0.3]	0.254709	67.7374	8.49e-06	78.5	0.012979	58.7	15.323
ENSP00000202773	RPL6	NonDomCDRP	0.1395	dNdS:II_(0,0.15]	-0.0682	44.5216	0.988288	10.3	0.243112	6.5	37.8472
ENSP00000202816	ESF1	NonDomCDRP	0.9439	dNdS:V_(0.5,1]	-0.60062	16.6869	0.084445	44.1	0.033837	37.3	58.7544
ENSP00000202831	SLC8B1	NoCDRP	0.3113	dNdS:IV_(0.3,0.5]	-0.02192	47.7976	5.48e-10	91.6			0
ENSP00000202967	SIRT4	NoCDRP	0.1649	dNdS:III_(0.15,0.3]	-0.09439	42.5016	1.81e-07	85.3	0.005056	81.9	0.318471
ENSP00000203001	TRMT6	D_nonD_CDRP	0.2754	dNdS:III_(0.15,0.3]	-0.87104	10.158	0.000493	67.1	0.017126	52.1	34.8089
ENSP00000203407	UQCRC1	NoCDRP	noVariation	dNdS:VII_0_0	-0.41319	23.7657	0.132467	41.4	0.022123	46.3	5.20833
ENSP00000203556	GMIP	D_nonD_CDRP	0.1791	dNdS:III_(0.15,0.3]	-0.07334	44.1743	7.29e-05	72.8	0.021756	46.7	47.4227
ENSP00000203629	LAG3	NonDomCDRP	0.3578	dNdS:IV_(0.3,0.5]	0.585823	83.7009	0.109617	42.6	0.063457	25.4	20.381
ENSP00000203664	OTUB2	NoCDRP	0.1353	dNdS:II_(0,0.15]	0.190729	63.8305	9.31e-06	78.2	0.005978	78.2	0
ENSP00000204517	TFAP4	NonDomCDRP	0.1878	dNdS:III_(0.15,0.3]	-0.3233	28.0662	0.978529	12	0.221372	8.5	66.568
ENSP00000204549	PDCD7	NonDomCDRP	0.4986	dNdS:IV_(0.3,0.5]	-0.24364	32.8356	0.045375	47.5	0.017324	51.8	40.8247
ENSP00000204566	SPG21	NoCDRP	noVariation	dNdS:VII_0_0	-0.53818	18.6722	9.88e-05	71.9	0.008763	68.5	1.62338
ENSP00000204604	CHRD	NonDomCDRP	0.2132	dNdS:III_(0.15,0.3]	0.299098	70.4405	0.000381	67.9	0.021513	47	18.8482
ENSP00000204615	THPO	NonDomCDRP	0.6852	dNdS:V_(0.5,1]	-0.0334	47.0568	0.00514	58	0.018387	50.5	33.4278
ENSP00000204679	GNPTG	NonDomCDRP	0.2477	dNdS:III_(0.15,0.3]	-0.7106	13.6077	6e-08	86.7	0.00597	78.2	26.5574
ENSP00000204961	EFNB1	NonDomCDRP	0.1404	dNdS:II_(0,0.15]	-0.22113	34.271	0.781252	22.2	0.230084	7.6	27.4566
ENSP00000205061	GLG1	NonDomCDRP	0.0928	dNdS:II_(0,0.15]	-1.83418	2.10685	0.997711	7.1	0.082542	21.5	6.98254
ENSP00000205143		NoCDRP	0.1754	dNdS:III_(0.15,0.3]					0.007478	72.7	11.3269
ENSP00000205194		NoCDRP	200	dNdS:VI_>1							0.970874
ENSP00000205214	AASDH	NoCDRP	0.5405	dNdS:V_(0.5,1]	0.114392	58.3203	2.01e-05	76.2	0.017383	51.7	0.364299
ENSP00000205386	LAMB4	NoCDRP	0.5545	dNdS:V_(0.5,1]	-0.27424	31.0471	3.21e-30	99.7			4.25894
ENSP00000205402	DLD	NoCDRP	noVariation	dNdS:VII_0_0	-0.65903	15.0547	0.371053	33.6	0.023384	45.1	0.589391
ENSP00000205557	ABCC6	NonDomCDRP	0.2667	dNdS:III_(0.15,0.3]	0.012675	50.4544	1.45e-06	82			5.98802
ENSP00000205636	CMTM6	NoCDRP	200	dNdS:VI_>1	0.153064	61.2143	0.822757	20.9	0.214998	9	7.10383
ENSP00000205890		D_nonD_CDRP	0.1893	dNdS:III_(0.15,0.3]							30.5099
ENSP00000205948	APOH	NoCDRP	0.1942	dNdS:III_(0.15,0.3]	0.513512	81.0384	1.29e-10	92.8	0.003162	90.3	0
ENSP00000206020	SPAG7	NonDomCDRP	0.2983	dNdS:III_(0.15,0.3]	-0.2877	30.2136	0.001147	64.2	0.014278	56.3	50.2203
ENSP00000206249	ESR1	DomCDRP	0.1326	dNdS:II_(0,0.15]	-0.67308	14.6843	0.987167	10.5	0.130523	15	18.9916
ENSP00000206262	RGS17	NoCDRP	noVariation	dNdS:VII_0_0	-0.03451	46.97	0.380684	33.3	0.048165	30.7	15.2381
ENSP00000206380	TMEM101	NoCDRP	noVariation	dNdS:VII_0_0	-0.21363	34.682	0.161636	40.1	0.015065	55.1	0
ENSP00000206474	HAUS4	NoCDRP	1.5	dNdS:VI_>1	0.109152	57.9441	0.03681	48.7	0.025872	42.9	0
ENSP00000206513	CEBPE	NonDomCDRP	0.1616	dNdS:III_(0.15,0.3]	-0.14595	39.0056	0.002392	61.3	0.013424	58	69.395
ENSP00000206542	OSGEP	NoCDRP	noVariation	dNdS:VII_0_0	0.041625	52.6712	1.8e-05	76.5	0.012375	59.8	2.68657
ENSP00000206765	TGM1	NonDomCDRP	0.1545	dNdS:III_(0.15,0.3]	0.642485	85.4373	5.31e-07	83.6	0.004393	84.5	17.7479
ENSP00000207457	TEKT2	NoCDRP	0.3583	dNdS:IV_(0.3,0.5]	1.11026	94.0673	4.73e-09	89.6	0.006087	77.8	11.3953
ENSP00000207870	XYLB	NoCDRP	0.5306	dNdS:V_(0.5,1]	0.507116	80.749	2.63e-13	95.8	0.003254	89.8	1.86567
ENSP00000209668	ADH1A	NoCDRP	0.5877	dNdS:V_(0.5,1]	0.135488	59.8773	6.69e-08	86.6	0.001048	98.6	0
ENSP00000209718	KRT23	NonDomCDRP	0.3265	dNdS:IV_(0.3,0.5]	0.44135	77.9534	2.83e-08	87.7	0.00586	78.7	40.2844
ENSP00000209728	CDC6	NonDomCDRP	1.1176	dNdS:VI_>1	-0.79409	11.6803	1.81e-06	81.5	0.006042	77.9	24.2857
ENSP00000209873	AAAS	NoCDRP	0.1828	dNdS:III_(0.15,0.3]	-0.19736	35.6833	4.54e-10	91.8	0.004438	84.3	12.0879
ENSP00000209875	CBX5	NonDomCDRP	noVariation	dNdS:VII_0_0	0.008591	50.1592	0.835001	20.5	0.229785	7.7	40.8377
ENSP00000209884	KLHL20	NoCDRP	noVariation	dNdS:VII_0_0	-0.70596	13.7813	0.061677	45.8	0.013523	57.8	12.6437
ENSP00000209929	FMO2	NoCDRP	0.1011	dNdS:II_(0,0.15]	1.62533	97.5922	0.00129	63.7			0
ENSP00000210187	RAB26	NonDomCDRP	noVariation	dNdS:VII_0_0	0.379263	74.8973	3.56e-06	80.2	0.00637	76.8	21.0938
ENSP00000210313	PSMD5	NoCDRP	0.0794	dNdS:II_(0,0.15]	-0.02766	47.4562	1.27e-05	77.5	0.005956	78.3	0.396825
ENSP00000210444	NANS	NoCDRP	noVariation	dNdS:VII_0_0	-0.39642	24.5992	0.000177	70.2	0.009494	66.5	0.835655
ENSP00000210633	SEMA4G	NoCDRP	noHomolog	dNdS:VIIII_noHomolog	0.222153	65.7348	0.000802	65.5	0.013894	57.1	21.7082
ENSP00000211076	TPSD1	NoCDRP	noHomolog	dNdS:VIIII_noHomolog	2.05791	98.6514	8.52e-09	89.1	0.000777	99.3	0.826446
ENSP00000211122	GSTA3	NoCDRP	0.5529	dNdS:V_(0.5,1]	0.576259	83.2957	0.086863	44	0.006174	77.5	2.7027
ENSP00000211287	MAPK13	NoCDRP	0.0629	dNdS:II_(0,0.15]	0.242444	67.0429	5.48e-07	83.6			8.21918
ENSP00000211314	TMEM14A	NoCDRP	noVariation	dNdS:VII_0_0	0.50954	80.83	0.121253	42	0.011374	61.9	0
ENSP00000211372	RPS18	NoCDRP	noHomolog	dNdS:VIIII_noHomolog	0.083622	55.9877	0.962013	13.8	0.303193	2.8	11.8421
ENSP00000211402	VARS	NonDomCDRP	noHomolog	dNdS:VIIII_noHomolog	-0.31138	28.8244	0.679794	25.2	0.017511	51.6	11.2342
ENSP00000211413	PRRT1	NonDomCDRP	noVariation	dNdS:VII_0_0	0.069573	54.8648	0.407946	32.6	0.048927	30.4	57.8431
ENSP00000211998	VCL	DomCDRP	noVariation	dNdS:VII_0_0	-0.69529	14.0939	0.99487	8.5	0.047177	31.1	35.1852
ENSP00000212015	SIRT1	NonDomCDRP	0.1733	dNdS:III_(0.15,0.3]	-0.55111	18.1687	0.951788	14.6	0.105165	17.9	49.6653
ENSP00000214869	TMED1	NoCDRP	noVariation	dNdS:VII_0_0	0.263846	68.3105	0.000162	70.4	0.005835	78.8	2.64317
ENSP00000215061	OCEL1	NonDomCDRP	0.8182	dNdS:V_(0.5,1]	1.04913	93.3495	0.000145	70.8			59.8485
ENSP00000215095	STX1B	NoCDRP	noVariation	dNdS:VII_0_0	-0.29808	29.5595	0.944475	15.2	0.105963	17.8	32.9861
ENSP00000215368	EFNA2	NoCDRP	noVariation	dNdS:VII_0_0	-0.28307	30.4914	0.37675	33.4			1.40845
ENSP00000215375		NoCDRP	noVariation	dNdS:VII_0_0							0
ENSP00000215530		NoCDRP	0.2851	dNdS:III_(0.15,0.3]							12.3529
ENSP00000215531		DomCDRP	noHomolog	dNdS:VIIII_noHomolog							49.2308
ENSP00000215555		NoCDRP	noVariation	dNdS:VII_0_0							3.65854
ENSP00000215565	NDUFB7	NoCDRP	0.0704	dNdS:II_(0,0.15]	0.669023	86.1782	0.045466	47.5			38.6861
ENSP00000215567	TECR	NoCDRP	0.0492	dNdS:II_(0,0.15]	-0.07475	44.0644	0.757501	22.9	0.048228	30.6	0
ENSP00000215570	TIMM13	NoCDRP	noVariation	dNdS:VII_0_0	0.010505	50.327	0.309092	35.5	0.049279	30.3	1.05263
ENSP00000215574	CDC34	NoCDRP	0.0509	dNdS:II_(0,0.15]	-0.35619	26.515	0.560463	28.4	0.24436	6.4	19.0678
ENSP00000215582	MISP	D_nonD_CDRP	0.2826	dNdS:III_(0.15,0.3]	1.41744	96.4693	1.95e-10	92.5	0.00246	93.1	78.4978
ENSP00000215659	MAPK12	NoCDRP	0.1176	dNdS:II_(0,0.15]	0.734932	87.7236	0.01362	53.6	0.00249	93	7.62943
ENSP00000215727	SERPIND1	NoCDRP	0.0758	dNdS:II_(0,0.15]	-0.13079	40.0185	2.8e-05	75.4	0.007517	72.6	5.61122
ENSP00000215730	SNAP29	D_nonD_CDRP	0.4634	dNdS:IV_(0.3,0.5]	0.570668	83.0931	0.151662	40.5	0.051045	29.5	73.2558
ENSP00000215739	LZTR1	NoCDRP	0.0146	dNdS:II_(0,0.15]	-2.18983	1.29652	3.38e-52	100			5.35714
ENSP00000215743	MMP11	NonDomCDRP	0.1107	dNdS:II_(0,0.15]	0.640259	85.3447	6.59e-05	73.1	0.005475	80.2	17.418
ENSP00000215754		NoCDRP	0.5329	dNdS:V_(0.5,1]							0
ENSP00000215770		NoCDRP	noHomolog	dNdS:VIIII_noHomolog							2.98507
ENSP00000215781	OSM	NonDomCDRP	0.4783	dNdS:IV_(0.3,0.5]	0.47217	79.4119	0.397921	32.8	0.056431	27.5	32.9365
ENSP00000215793	SF3A1	D_nonD_CDRP	0.1364	dNdS:II_(0,0.15]	-0.67867	14.5396	0.994075	8.8	0.084638	21.1	67.5914
ENSP00000215794	USP18	NoCDRP	0.2041	dNdS:III_(0.15,0.3]	0.321151	71.847	0.392599	33	0.047282	31	6.45161
ENSP00000215812	SEC14L3	NoCDRP	0.3889	dNdS:IV_(0.3,0.5]	0.722795	87.492	4.21e-18	98.2			4.5
ENSP00000215829	SNRPD3	NoCDRP	noVariation	dNdS:VII_0_0	0.000131	49.4415	0.877845	18.7	0.238411	6.9	18.254
ENSP00000215832	MAPK1	NoCDRP	noVariation	dNdS:VII_0_0	-0.07953	43.665	0.981866	11.4	0.220654	8.5	0
ENSP00000215838	TCN2	NoCDRP	0.5357	dNdS:V_(0.5,1]	1.17508	94.7908	0.02229	51.1	0.019763	48.9	0.702576
ENSP00000215855	CRYBB3	NoCDRP	0.6581	dNdS:V_(0.5,1]	1.01911	93.0023	4.07e-10	91.9			9.00474
ENSP00000215882	SLC25A1	NoCDRP	0.1048	dNdS:II_(0,0.15]	-0.25769	32.06	0.633539	26.5	0.05747	27.2	1.28617
ENSP00000215885	PLA2G3	NonDomCDRP	0.9167	dNdS:V_(0.5,1]	0.848591	90.1835	1.14e-08	88.8			24.165
ENSP00000215886	LGALS2	NoCDRP	0.7978	dNdS:V_(0.5,1]	0.618411	84.7196	0.014689	53.3	0.012179	60.1	11.3636
ENSP00000215904	PDXP	NoCDRP	0.0774	dNdS:II_(0,0.15]	0.171896	62.6613	0.042715	47.9	0.044818	32.1	5.06757
ENSP00000215906	ASPHD2	NoCDRP	noVariation	dNdS:VII_0_0	-0.72847	13.1967	0.526013	29.3	0.02727	41.8	0
ENSP00000215909	LGALS1	NoCDRP	noVariation	dNdS:VII_0_0	-0.23055	33.7153	0.004637	58.5	0.006061	77.9	0
ENSP00000215912	PIK3IP1	NoCDRP	0.5	dNdS:IV_(0.3,0.5]	0.238468	66.7535	0.059751	46	0.013095	58.5	29.2776
ENSP00000215917	SRRD	NonDomCDRP	0.3103	dNdS:IV_(0.3,0.5]	0.077227	55.4668	1.59e-06	81.8	0.007041	74.2	12.9794
ENSP00000215939	CRYBB1	NonDomCDRP	0.2823	dNdS:III_(0.15,0.3]	0.230157	66.2557	0.000389	67.8	0.010007	65.3	18.6508
ENSP00000215941	ANKRD54	NoCDRP	0.1079	dNdS:II_(0,0.15]	0.316368	71.5055	0.015308	53	0.012734	59.2	38
ENSP00000215957	MICALL1	NonDomCDRP	0.3238	dNdS:IV_(0.3,0.5]	-0.33609	27.4411	0.000381	67.9	0.023247	45.3	65.3534
ENSP00000215980	CENPM	NoCDRP	noVariation	dNdS:VII_0_0	0.134381	59.7963	0.213984	38.3	0.018676	50.2	0.555556
ENSP00000216024	DMC1	NoCDRP	0.2188	dNdS:III_(0.15,0.3]	-0.34773	26.8854	0.18076	39.3	0.023179	45.3	6.76471
ENSP00000216027	HSCB	NoCDRP	200	dNdS:VI_>1	0.037798	52.376	0.000142	70.8	0.007615	72.2	1.2766
ENSP00000216034	TOMM22	NonDomCDRP	noVariation	dNdS:VII_0_0	-0.02046	47.8671	0.785833	22.1	0.20719	9.8	38.7324
ENSP00000216036		NoCDRP	0.1793	dNdS:III_(0.15,0.3]							0.862069
ENSP00000216038	RTCB	NoCDRP	noHomolog	dNdS:VIIII_noHomolog	-0.93107	9.03513	0.058729	46.1	0.019431	49.3	2.9703
ENSP00000216039	JOSD1	NoCDRP	noVariation	dNdS:VII_0_0	-0.26807	31.3596	0.319905	35.1	0.044679	32.1	3.9604
ENSP00000216044	GTPBP1	NonDomCDRP	noVariation	dNdS:VII_0_0	-0.80351	11.4777	0.996189	7.9	0.345873	1.8	24.5142
ENSP00000216061	PPP6R2	D_nonD_CDRP	0.1459	dNdS:II_(0,0.15]	-0.00757	48.8279	0.718789	24.1	0.050483	29.7	34.1615
ENSP00000216068	DNAL4	NoCDRP	noVariation	dNdS:VII_0_0	0.371613	74.4805	0.323422	35.1	0.011539	61.4	5.71429
ENSP00000216071	C22orf31	DomCDRP	0.5455	dNdS:V_(0.5,1]	0.170133	62.534	2.32e-05	75.8	0.005825	78.8	43.4483
ENSP00000216075	MIOX	NoCDRP	noVariation	dNdS:VII_0_0	0.956359	92.1225	4.6e-12	94.7	0.002331	93.8	2.10526
ENSP00000216085	RHBDD3	NoCDRP	0.437	dNdS:IV_(0.3,0.5]	0.896184	91.0459	2.04e-05	76.2			20.4663
ENSP00000216099	APOBEC3D	NoCDRP	1.8722	dNdS:VI_>1	0.867273	90.4903	2.36e-05	75.8	0.00742	73	0.259067
ENSP00000216101		NoCDRP	noVariation	dNdS:VII_0_0							10.8374
ENSP00000216106	HMGXB4	D_nonD_CDRP	0.2297	dNdS:III_(0.15,0.3]	-0.77158	12.1491	0.218813	38.1	0.036077	36.2	67.2213
ENSP00000216115	BIK	NoCDRP	0.3282	dNdS:IV_(0.3,0.5]	0.307909	70.9382	2.54e-05	75.6	0.005541	80	9.375
ENSP00000216117	HMOX1	NonDomCDRP	noVariation	dNdS:VII_0_0	0.460033	78.8216	0.000641	66.3	0.007212	73.6	23.9583
ENSP00000216121	NIPSNAP1	NoCDRP	0.2897	dNdS:III_(0.15,0.3]	-0.32154	28.2167	0.979279	11.9	0.132969	14.9	0.704225
ENSP00000216122	MCM5	NoCDRP	0.1063	dNdS:II_(0,0.15]	0.332784	72.4663	0.563693	28.4	0.041029	33.7	5.85831
ENSP00000216124	ARSA	NoCDRP	0.474	dNdS:IV_(0.3,0.5]	0.826886	89.7089	8.51e-08	86.3			2.55403
ENSP00000216127	RASD2	NoCDRP	noVariation	dNdS:VII_0_0	-0.11322	41.2456	0.71662	24.2	0.209548	9.6	1.8797
ENSP00000216129	TTLL12	NonDomCDRP	0.2	dNdS:III_(0.15,0.3]	-0.26283	31.6664	1.99e-15	97.1	0.006228	77.3	9.00621
ENSP00000216133	CBX7	NonDomCDRP	noVariation	dNdS:VII_0_0	-0.09358	42.5768	0.837455	20.4	0.094741	19.6	46.2151
ENSP00000216139	ACR	NonDomCDRP	0.4857	dNdS:IV_(0.3,0.5]	0.156084	61.4806	0.01546	53	0.022027	46.4	27.791
ENSP00000216144	CABP7	NoCDRP	0.4334	dNdS:IV_(0.3,0.5]	-0.34964	26.8334	0.899633	17.8	0.263722	4.9	1.86047
ENSP00000216160	TAB1	NonDomCDRP	0.125	dNdS:II_(0,0.15]	-0.82028	11.1709	0.003996	59.1	0.017999	50.9	29.5635
ENSP00000216177	PNPLA5	NoCDRP	0.3978	dNdS:IV_(0.3,0.5]	1.1299	94.3335	9.38e-07	82.6	0.001696	96.3	4.1958
ENSP00000216180	PNPLA3	NoCDRP	0.2714	dNdS:III_(0.15,0.3]	0.537128	81.9529	0.000104	71.7	0.007602	72.3	2.7027
ENSP00000216181	MYH9	D_nonD_CDRP	0.1155	dNdS:II_(0,0.15]	-2.93856	0.625109	1	0.4	0.414195	0.8	40.2041
ENSP00000216187	FOXRED2	NoCDRP	0.2408	dNdS:III_(0.15,0.3]	0.106736	57.672	0.006915	56.7	0.010033	65.2	5.26316
ENSP00000216190	EIF3D	NoCDRP	noVariation	dNdS:VII_0_0	-1.00243	7.82543	0.994222	8.8	0.074816	23	16.2409
ENSP00000216194	ADSL	NoCDRP	0.4032	dNdS:IV_(0.3,0.5]	0.100843	57.3016	0.000213	69.6	0.019223	49.6	3.41365
ENSP00000216200	PVALB	NoCDRP	noHomolog	dNdS:VIIII_noHomolog	0.07053	54.9227	0.06787	45.2	0.009823	65.7	0
ENSP00000216211	UPK3A	NoCDRP	0.2392	dNdS:III_(0.15,0.3]	0.7161	87.301	1.41e-07	85.7			11.4983
ENSP00000216218	ST13	NonDomCDRP	noHomolog	dNdS:VIIII_noHomolog	-0.27733	30.8098	0.659424	25.8	0.048183	30.7	69.1057
ENSP00000216223	IL2RB	D_nonD_CDRP	0.2406	dNdS:III_(0.15,0.3]	0.11872	58.6618	0.986757	10.7	0.004048	86.1	27.5862
ENSP00000216225	RBX1	NoCDRP	noVariation	dNdS:VII_0_0	0.090169	56.4392	0.940247	15.6	0.298025	3	0.925926
ENSP00000216237	L3MBTL2	NonDomCDRP	0.1398	dNdS:II_(0,0.15]	-0.65792	15.1184	0.013028	53.8	0.021223	47.3	24.6809
ENSP00000216241		NoCDRP	0.5	dNdS:IV_(0.3,0.5]							10.3675
ENSP00000216252	PHF5A	NoCDRP	noVariation	dNdS:VII_0_0	0.082666	55.9067	0.849501	19.9	0.244213	6.4	0
ENSP00000216259	PMM1	NoCDRP	noVariation	dNdS:VII_0_0	-0.07283	44.2496	0.00016	70.4	0.004401	84.4	1.52672
ENSP00000216264	CERK	NoCDRP	0.0854	dNdS:II_(0,0.15]	0.467686	79.2325	1.6e-05	76.8	0.00976	65.8	3.16574
ENSP00000216268	ZBED4	NonDomCDRP	0.2077	dNdS:III_(0.15,0.3]	-0.81316	11.3214	0.989507	10	0.18437	11.8	18.7874
ENSP00000216271	HDAC10	NonDomCDRP	0.3761	dNdS:IV_(0.3,0.5]	-0.37729	25.6121	3.28e-12	94.8	0.003227	89.9	9.71599
ENSP00000216274	RIPK3	D_nonD_CDRP	0.3084	dNdS:IV_(0.3,0.5]	-0.22178	34.2363	2.24e-06	81.1			46.332
ENSP00000216277	PAPOLA	NonDomCDRP	noVariation	dNdS:VII_0_0	-0.59996	16.7101	0.999972	3	0.22929	7.7	37.1812
ENSP00000216286	NID2	D_nonD_CDRP	0.3784	dNdS:IV_(0.3,0.5]	2.77894	99.3633	6.95e-07	83.1	0.005056	81.9	20.2909
ENSP00000216294	SNAPC1	NonDomCDRP	0.5316	dNdS:V_(0.5,1]	-0.27541	30.9602	3.82e-07	84.1	0.007237	73.5	37.5
ENSP00000216297	SUPT16H	NonDomCDRP	noVariation	dNdS:VII_0_0	-1.17964	5.81698	1	1.4	0.53096	0.2	21.872
ENSP00000216336	CTSG	NoCDRP	0.4056	dNdS:IV_(0.3,0.5]	0.075313	55.3221	0.202073	38.7	0.036974	35.6	16.4706
ENSP00000216338	GZMH	NoCDRP	4.4364	dNdS:VI_>1	0.578171	83.3883	0.000213	69.6	0.012064	60.3	3.65854
ENSP00000216341	GZMB	NoCDRP	0.5114	dNdS:V_(0.5,1]	0.032208	52.0287	1.79e-06	81.5	0.004922	82.3	14.17
ENSP00000216366	AP4S1	NoCDRP	200	dNdS:VI_>1	0.261934	68.1368	1.34e-07	85.8	0.00386	87	0
ENSP00000216367	POLE2	NoCDRP	0.7636	dNdS:V_(0.5,1]	-0.42452	23.3663	0.000153	70.6	0.012274	60	2.46679
ENSP00000216373	SOS2	NonDomCDRP	0.2571	dNdS:III_(0.15,0.3]	-0.70648	13.7292	0.999428	5.3	0.070264	23.8	21.2462
ENSP00000216392	PYGL	NoCDRP	noVariation	dNdS:VII_0_0	-0.87538	10.077	1.31e-09	90.9	0.009552	66.4	0.826446
ENSP00000216410	GNPNAT1	NoCDRP	noVariation	dNdS:VII_0_0	-0.08049	43.5608	0.005567	57.6	0.01248	59.7	4.34783
ENSP00000216420	CGRRF1	NoCDRP	200	dNdS:VI_>1	0.032208	52.0287	0.005227	57.9	0.014074	56.8	5.12048
ENSP00000216442	ATP6V1D	NoCDRP	noVariation	dNdS:VII_0_0	-0.1311	39.9838	0.003151	60.1	0.015837	53.9	0.809717
ENSP00000216446	PLEK2	NoCDRP	0.0833	dNdS:II_(0,0.15]	-0.07842	43.7807	2.22e-08	88	0.002721	92.1	2.83286
ENSP00000216452	PIGH	NoCDRP	noVariation	dNdS:VII_0_0	0.144604	60.5661	0.069882	45.1			0
ENSP00000216455	PSMA3	NoCDRP	noVariation	dNdS:VII_0_0	-0.17707	36.9277	0.990282	9.9	0.223177	8.3	7.45098
ENSP00000216468	TMED8	D_nonD_CDRP	0.0867	dNdS:II_(0,0.15]	-0.11977	40.7883	0.084325	44.1	0.020822	47.8	46.7692
ENSP00000216471	SAMD15	NonDomCDRP	1.8806	dNdS:VI_>1	0.386109	75.2156	2.34e-06	81	0.006026	78	75.816
ENSP00000216479	AHSA1	NoCDRP	0.5172	dNdS:V_(0.5,1]	-0.04761	46.0207	0.938521	15.7	0.101513	18.4	16.8639
ENSP00000216484	SPTLC2	NoCDRP	noVariation	dNdS:VII_0_0	-0.52397	19.2684	0.820594	21	0.056917	27.4	1.06762
ENSP00000216487	RIN3	NonDomCDRP	0.3051	dNdS:IV_(0.3,0.5]	0.10976	57.9614	0.000277	68.9	0.009773	65.8	37.0558
ENSP00000216489	ALKBH1	NoCDRP	0.1875	dNdS:III_(0.15,0.3]	0.370952	74.4516	2.13e-05	76.1	0.002896	91.4	6.16967
ENSP00000216492	CHGA	DomCDRP	noVariation	dNdS:VII_0_0	0.60355	84.245	0.000145	70.7	0.01188	60.6	84.4639
ENSP00000216513	SIX4	NonDomCDRP	0.3579	dNdS:IV_(0.3,0.5]	-0.1889	36.2274	0.685504	25	0.118006	16.2	29.1933
ENSP00000216540	SLC10A1	NoCDRP	0.1843	dNdS:III_(0.15,0.3]	0.050236	53.4236	8.44e-16	97.3	0.001034	98.7	0
ENSP00000216602	ZFYVE21	NoCDRP	0.2281	dNdS:III_(0.15,0.3]	-0.37215	25.7684	0.713443	24.2	0.088512	20.5	3.96825
ENSP00000216629	BDKRB1	NoCDRP	0.3451	dNdS:IV_(0.3,0.5]	1.13645	94.403	0.070105	45.1			0.283286
ENSP00000216639	VRK1	NonDomCDRP	0.1429	dNdS:II_(0,0.15]	-0.33831	27.3369	0.042898	47.9	0.017352	51.8	13.8889
ENSP00000216714	APEX1	NonDomCDRP	0.2	dNdS:III_(0.15,0.3]	-0.05496	45.4709	0.000104	71.7	0.021476	47.1	23.5849
ENSP00000216727	PABPN1	NonDomCDRP	noVariation	dNdS:VII_0_0	-0.01951	47.9481	0.599825	27.5	0.059799	26.4	62.4183
ENSP00000216733	EFS	D_nonD_CDRP	1.059	dNdS:VI_>1	0.721034	87.4689	2.45e-06	80.9	0.007268	73.4	67.5579
ENSP00000216774	SRP54	NoCDRP	noVariation	dNdS:VII_0_0	-0.40216	24.2866	0.99669	7.7	0.149373	13.7	7.53968
ENSP00000216780	PCK2	NoCDRP	0.3583	dNdS:IV_(0.3,0.5]	1.35724	96.1567	2.19e-17	97.9			7.96875
ENSP00000216797	NFKBIA	NonDomCDRP	0.1474	dNdS:II_(0,0.15]	-0.39929	24.4834	0.979352	11.9	0.225386	8.1	27.1293
ENSP00000216799	EMC9	NoCDRP	0.5208	dNdS:V_(0.5,1]	0.446791	78.1964	0.000354	68.2	0.00552	80.1	7.21154
ENSP00000216807	BRMS1L	NonDomCDRP	noVariation	dNdS:VII_0_0	0.035884	52.2892	0.368283	33.7	0.052722	28.8	29.7214
ENSP00000216832	PNN	D_nonD_CDRP	0.2825	dNdS:III_(0.15,0.3]	-0.53132	18.9385	0.163642	40	0.057963	27	89.9582
ENSP00000216862	CYP24A1	NoCDRP	0.5798	dNdS:V_(0.5,1]	0.672186	86.236	3.24e-10	92.1	0.007771	71.7	4.86381
ENSP00000216923	ZFP64	NonDomCDRP	0.1615	dNdS:III_(0.15,0.3]	-0.21111	34.8614	0.00519	57.9	0.024008	44.6	31.8649
ENSP00000216951	GSS	NoCDRP	0.1031	dNdS:II_(0,0.15]	0.15991	61.7526	0.022519	51.1	0.022274	46.2	0.632911
ENSP00000216962	PYGB	NoCDRP	noHomolog	dNdS:VIIII_noHomolog	-0.94932	8.73415	4.76e-07	83.8	0.014855	55.4	1.54211
ENSP00000216968	PROCR	NoCDRP	0.3314	dNdS:IV_(0.3,0.5]	0.265759	68.4147	0.010131	54.9	0.012918	58.8	0
ENSP00000217026	MYBL2	D_nonD_CDRP	0.5368	dNdS:V_(0.5,1]	-0.08945	42.8373	0.992108	9.4	0.111589	16.9	50.1429
ENSP00000217043	R3HDML	NoCDRP	0.3029	dNdS:IV_(0.3,0.5]	0.69359	86.7512	0.002996	60.3	0.015175	55	1.18577
ENSP00000217086	SALL4	NonDomCDRP	0.2619	dNdS:III_(0.15,0.3]	-0.84427	10.6847	0.999442	5.3	0.387166	1.1	52.7066
ENSP00000217109	CSTF1	NoCDRP	noVariation	dNdS:VII_0_0	-0.89179	9.74706	0.937896	15.7	0.119619	16	2.32019
ENSP00000217121	TPD52L2	DomCDRP	0.4583	dNdS:IV_(0.3,0.5]	-0.03915	46.6632	0.595605	27.5	0.030585	39.5	45.4148
ENSP00000217131	CTSZ	NoCDRP	noVariation	dNdS:VII_0_0	-0.04186	46.4548	1.32e-09	90.9	0.003527	88.5	0.330033
ENSP00000217133	TUBB1	NoCDRP	0.1587	dNdS:III_(0.15,0.3]	0.429214	77.3572	7.17e-06	78.9	0.001778	96.1	4.65632
ENSP00000217159	SLCO4A1	NonDomCDRP	0.0932	dNdS:II_(0,0.15]	0.830068	89.7899	5.34e-07	83.6	0.008456	69.4	6.5097
ENSP00000217169	BIRC7	NonDomCDRP	0.2542	dNdS:III_(0.15,0.3]	0.922519	91.5784	0.003803	59.3	0.009521	66.4	34.8993
ENSP00000217173	UBOX5	NoCDRP	0.2044	dNdS:III_(0.15,0.3]	0.003305	49.7598	0.001787	62.3	0.010798	63.5	20.8872
ENSP00000217188	SRMS	NoCDRP	0.0404	dNdS:II_(0,0.15]	1.85814	98.3215	5.13e-12	94.6	0.003186	90.2	4.91803
ENSP00000217195	C20orf27	NoCDRP	0.3433	dNdS:IV_(0.3,0.5]	0.045301	53.0069	0.027099	50.2	0.006171	77.5	3.51759
ENSP00000217244	CSNK2A1	NoCDRP	1.1983	dNdS:VI_>1	-0.06916	44.4464	0.999647	4.8	0.213896	9.1	12.7877
ENSP00000217246	MACROD2	NonDomCDRP	0.7946	dNdS:V_(0.5,1]	0.582953	83.6141	0.011357	54.4	0.014677	55.6	48.4706
ENSP00000217254	SLC52A3	NoCDRP	0.1753	dNdS:III_(0.15,0.3]	-0.40201	24.3098	0.001625	62.8	0.008917	68.1	1.91898
ENSP00000217260	RSPO4	NonDomCDRP	3.0195	dNdS:VI_>1	0.690721	86.6933	0.000413	67.6	0.006738	75.3	15.812
ENSP00000217270	PROKR2	NoCDRP	0.1667	dNdS:III_(0.15,0.3]	0.03236	52.0461	0.000669	66.1	0.010605	63.9	0.260417
ENSP00000217289	FERMT1	NoCDRP	noHomolog	dNdS:VIIII_noHomolog	-0.52286	19.3089	7.57e-07	83	0.007286	73.3	1.92024
ENSP00000217381	SNTA1	NonDomCDRP	0.2621	dNdS:III_(0.15,0.3]	0.151451	61.0986	0.428235	32	0.029279	40.3	24.3564
ENSP00000217386	OXT	NoCDRP	0.1477	dNdS:II_(0,0.15]	0.03956	52.5323	0.627957	26.7	0.167381	12.9	0
ENSP00000217402	CHMP4B	D_nonD_CDRP	0.2468	dNdS:III_(0.15,0.3]	-0.26998	31.2728	0.881586	18.5	0.252442	5.7	73.2143
ENSP00000217407	LBP	NoCDRP	0.5593	dNdS:V_(0.5,1]	2.33483	99.0276	5.69e-14	96.3	0.001226	98	0.2079
ENSP00000217420		NoCDRP	0.0875	dNdS:II_(0,0.15]							8
ENSP00000217423	CST4	NoCDRP	0.3794	dNdS:IV_(0.3,0.5]	0.836155	89.9114	7.3e-06	78.8	0.001178	98.3	0
ENSP00000217426	AHCY	NoCDRP	noVariation	dNdS:VII_0_0	-0.30256	29.3338	0.94407	15.3	0.058691	26.8	0
ENSP00000217428		NoCDRP	200	dNdS:VI_>1							0
ENSP00000217446	PIGU	NoCDRP	noVariation	dNdS:VII_0_0	-0.21443	34.6588	0.813069	21.2	0.105937	17.8	0
ENSP00000217455	ACOT8	NoCDRP	0.2857	dNdS:III_(0.15,0.3]	0.976957	92.435	3.57e-05	74.8	0.004187	85.5	10.0313
ENSP00000217456	APMAP	NonDomCDRP	0.4615	dNdS:IV_(0.3,0.5]	0.15991	61.7526	2.36e-07	84.9	0.007614	72.3	11.2981
ENSP00000217740	RNF125	NoCDRP	0.3167	dNdS:IV_(0.3,0.5]	0.515277	81.0789	0.080625	44.4	0.006409	76.6	4.31034
ENSP00000217901	IDH3G	NoCDRP	0.4656	dNdS:IV_(0.3,0.5]	0.107239	57.7647	0.968085	13.2	0.183645	11.9	8.90585
ENSP00000217909	SLC25A43	NoCDRP	200	dNdS:VI_>1	0.299449	70.4752	0.052955	46.7	0.005719	79.2	0.879765
ENSP00000217939	MXRA5	NonDomCDRP	0.5461	dNdS:V_(0.5,1]	2.84929	99.427	0.376484	33.4	0.02556	43.1	40.4173
ENSP00000217958	PSMD10	NoCDRP	noVariation	dNdS:VII_0_0	0.207499	64.8666	0.403603	32.7	0.052762	28.8	8.40708
ENSP00000217961	STS	NoCDRP	0.3151	dNdS:IV_(0.3,0.5]	0.916928	91.4453	0.981414	11.5	0.216209	8.9	1.37221
ENSP00000217971	PGRMC1	NoCDRP	0.2266	dNdS:III_(0.15,0.3]	0.366978	74.2085	0.622397	26.9	0.161196	13.1	27.6923
ENSP00000217999	RHOXF1	NonDomCDRP	noHomolog	dNdS:VIIII_noHomolog	0.285399	69.6822	0.8266	20.7	0.249032	6	66.8478
ENSP00000218004	NXT2	NonDomCDRP	1.0877	dNdS:VI_>1	0.327549	72.2	0.777281	22.4	0.201985	10.3	21.8274
ENSP00000218006	GUCY2F	NoCDRP	0.5143	dNdS:V_(0.5,1]	1.57312	97.3375	1.52e-05	77	0.006082	77.8	3.06859
ENSP00000218008	ATP1B4	NonDomCDRP	0.52	dNdS:V_(0.5,1]	0.554705	82.6012	0.002781	60.7	0.010029	65.2	15.6863
ENSP00000218068	PAGE4	DomCDRP	noVariation	dNdS:VII_0_0	0.295624	70.2263	0.648196	26.1	0.170323	12.7	0
ENSP00000218075	GLRA2	NoCDRP	0.3125	dNdS:IV_(0.3,0.5]	-0.06261	44.9557	0.908588	17.4	0.10013	18.7	5.97345
ENSP00000218089	STAG2	NonDomCDRP	0.0495	dNdS:II_(0,0.15]	-1.05304	7.17717	1	1.2	0.478978	0.3	22.1609
ENSP00000218099	F9	NoCDRP	0.1939	dNdS:III_(0.15,0.3]	0.621279	84.7832	0.989581	10	0.244343	6.4	1.95228
ENSP00000218104	ABCD1	NoCDRP	noHomolog	dNdS:VIIII_noHomolog	0.043539	52.8506	0.982119	11.4	0.209844	9.6	3.89262
ENSP00000218176	KCND1	NonDomCDRP	0.1944	dNdS:III_(0.15,0.3]	-0.07651	43.937	0.447026	31.5	0.054374	28.2	18.238
ENSP00000218230		DomCDRP	noHomolog	dNdS:VIIII_noHomolog							51.5385
ENSP00000218249	RAB40AL	NoCDRP	0.1342	dNdS:II_(0,0.15]	0.767668	88.5107	0.30649	35.6	0.061934	25.7	0.719424
ENSP00000218316	GPR50	D_nonD_CDRP	2.1667	dNdS:VI_>1	0.686236	86.566	0.44521	31.6	0.073828	23.1	45.705
ENSP00000218340	RP2	NoCDRP	0.3867	dNdS:IV_(0.3,0.5]	0.338878	72.8078	0.851506	19.8	0.250369	5.9	5.14286
ENSP00000218348	USP11	DomCDRP	noHomolog	dNdS:VIIII_noHomolog	-1.07172	6.88777	0.998323	6.7	0.129505	15.1	15.3686
ENSP00000218388	TIMP1	NoCDRP	noHomolog	dNdS:VIIII_noHomolog	1.20848	95.0975	0.766877	22.7	0.194824	10.9	0
ENSP00000218436	ITIH6	NonDomCDRP	0.575	dNdS:V_(0.5,1]	2.32786	99.016	9.89e-11	92.9			33.4349
ENSP00000218516	GLA	NoCDRP	200	dNdS:VI_>1	0.459885	78.8042	0.985046	10.9	0.234816	7.2	0.699301
ENSP00000218548	ATP12A	NoCDRP	0.1193	dNdS:II_(0,0.15]	0.269241	68.6404	9.71e-10	91.2			3.73206
ENSP00000218652	NDFIP2	NonDomCDRP	0.2733	dNdS:III_(0.15,0.3]	-0.00259	49.2389	0.801879	21.6	0.104734	18	52.381
ENSP00000218721	MLNR	NoCDRP	noHomolog	dNdS:VIIII_noHomolog	0.175723	62.916	0.046588	47.4	0.012365	59.8	9.46602
ENSP00000218867	SGCG	NoCDRP	1.1385	dNdS:VI_>1	0.313648	71.3087	0.00637	57	0.010505	64.1	5.84192
ENSP00000219022	OLFM4	NoCDRP	0.0514	dNdS:II_(0,0.15]	0.11026	58.002	2.41e-06	80.9			4.31373
ENSP00000219066	NTHL1	NonDomCDRP	0.1209	dNdS:II_(0,0.15]	0.536021	81.9182	1.77e-09	90.7			37.1795
ENSP00000219069	ZNF263	D_nonD_CDRP	0.7	dNdS:V_(0.5,1]	-0.37552	25.6584	0.008181	55.8	0.024096	44.5	49.1947
ENSP00000219070	MMP2	NoCDRP	0.0615	dNdS:II_(0,0.15]	-0.95997	8.55473	0.791258	22	0.033165	37.7	1.9697
ENSP00000219097	ORC6	DomCDRP	200	dNdS:VI_>1	-0.00722	48.8858	0.000734	65.8	0.005211	81.2	21.4286
ENSP00000219139	C16orf70	NoCDRP	noVariation	dNdS:VII_0_0	-0.39833	24.5181	0.803546	21.5	0.038822	34.7	4.2654
ENSP00000219150	CORO1A	DomCDRP	0.25	dNdS:III_(0.15,0.3]	-0.80542	11.4372	0.954491	14.4	0.11609	16.4	19.3059
ENSP00000219162	MT4	NoCDRP	1.0613	dNdS:VI_>1	0.387575	75.2503	0.007995	55.9	0.000311	100	0
ENSP00000219197	CBLN1	NoCDRP	noVariation	dNdS:VII_0_0	0.063026	54.3671	0.814123	21.1	0.236643	7	1.5544
ENSP00000219207	PLLP	NoCDRP	0.1387	dNdS:II_(0,0.15]	0.118418	58.6097	0.519582	29.5	0.069494	24	0
ENSP00000219235	CCL22	NoCDRP	0.2601	dNdS:III_(0.15,0.3]	0.184989	63.489	0.279053	36.2	0.007764	71.7	0
ENSP00000219240	DHODH	NoCDRP	0.1238	dNdS:II_(0,0.15]	0.022943	51.2994	0.012824	53.9	0.014619	55.8	8.10127
ENSP00000219252	POLR2C	NoCDRP	noVariation	dNdS:VII_0_0	-0.34214	27.1459	0.047008	47.4	0.026603	42.3	18.1818
ENSP00000219255	PARD6A	NonDomCDRP	0.7466	dNdS:V_(0.5,1]	-0.21635	34.5025	0.854735	19.7	0.026919	42	39.0173
ENSP00000219271	MMP15	NonDomCDRP	0.0754	dNdS:II_(0,0.15]	0.509987	80.8705	0.651305	26	0.041973	33.3	23.9163
ENSP00000219281	USB1	NonDomCDRP	200	dNdS:VI_>1	0.199188	64.3225	0.122775	42	0.015228	54.9	25.6604
ENSP00000219299	CCDC113	NoCDRP	1.1746	dNdS:VI_>1	0.408468	76.2748	3.95e-13	95.6			14.5889
ENSP00000219301	PRSS54	NoCDRP	0.4679	dNdS:IV_(0.3,0.5]	0.34094	72.9409	4.5e-05	74.2	0.004641	83.4	6.07595
ENSP00000219302	NME3	NoCDRP	noVariation	dNdS:VII_0_0	0.587442	83.7645	2.37e-06	81			0
ENSP00000219313	PSMD7	NonDomCDRP	noVariation	dNdS:VII_0_0	-0.50625	19.9687	0.019332	51.9	0.02309	45.5	16.358
ENSP00000219315	SETD6	NoCDRP	0.3059	dNdS:IV_(0.3,0.5]	-0.24908	32.5056	1.02e-09	91.1	0.004964	82.2	15.0106
ENSP00000219320	SLC38A7	NoCDRP	0.0874	dNdS:II_(0,0.15]	-0.15904	38.0969	0.031406	49.5	0.024347	44.2	0.865801
ENSP00000219334	SMPD3	NonDomCDRP	0.0539	dNdS:II_(0,0.15]	-0.04524	46.1944	0.659196	25.8	0.057004	27.4	24.5802
ENSP00000219343	SLC7A6	NonDomCDRP	noVariation	dNdS:VII_0_0	-0.2031	35.2781	0.022429	51.1	0.003404	89.1	7.76699
ENSP00000219345	PLA2G15	NoCDRP	0.371	dNdS:IV_(0.3,0.5]	-0.23599	33.3218	0.65843	25.8	0.057731	27.2	0.485437
ENSP00000219368	FA2H	NoCDRP	0.2675	dNdS:III_(0.15,0.3]	-0.06629	44.6663	0.72641	23.8	0.063072	25.5	13.9785
ENSP00000219406	PDIA2	NonDomCDRP	noHomolog	dNdS:VIIII_noHomolog	3.2363	99.6296	2.53e-21	98.9			11.4286
ENSP00000219409	ARHGDIG	NoCDRP	0.2972	dNdS:III_(0.15,0.3]	0.426194	77.1778	0.48623	30.4	0.07071	23.7	1.77778
ENSP00000219431	MPG	NonDomCDRP	0.5864	dNdS:V_(0.5,1]	0.568904	83.0237	4.24e-09	89.8			30.5369
ENSP00000219439	HSDL1	NoCDRP	0.1551	dNdS:III_(0.15,0.3]	-0.82602	11.0262	0.000929	65	0.010209	64.8	0
ENSP00000219454	WFDC1	NoCDRP	0.3061	dNdS:IV_(0.3,0.5]	0.972176	92.354	2.97e-06	80.6	0.001435	97.4	24.0909
ENSP00000219476	TSC2	NonDomCDRP	0.173	dNdS:III_(0.15,0.3]	-2.77235	0.735081	1	0.9	0.096255	19.3	23.575
ENSP00000219478	ZNF500	D_nonD_CDRP	noHomolog	dNdS:VIIII_noHomolog	0.176982	62.9855	0.000679	66.1	0.015135	55	52.2917
ENSP00000219481	DECR2	NoCDRP	0.3314	dNdS:IV_(0.3,0.5]	0.82593	89.6741	3.47e-09	90	0.002875	91.5	2.73973
ENSP00000219548	STUB1	NonDomCDRP	noVariation	dNdS:VII_0_0	-0.27078	31.2323	0.042534	47.9	0.031595	38.8	19.802
ENSP00000219551	RHBDL1	NonDomCDRP	0.4612	dNdS:IV_(0.3,0.5]	-0.47337	21.3058	0.494734	30.1	0.002019	95.1	19.6347
ENSP00000219596	MEFV	NonDomCDRP	0.314	dNdS:IV_(0.3,0.5]	1.34799	96.0931	1.12e-08	88.8	0.009271	67	41.2292
ENSP00000219611	CAPN15	NonDomCDRP	noHomolog	dNdS:VIIII_noHomolog	0.051497	53.4641	0.96521	13.5	0.037236	35.5	25.9669
ENSP00000219660	AQP8	NoCDRP	0.1475	dNdS:II_(0,0.15]	0.094146	56.7112	0.003848	59.2	0.010739	63.6	0
ENSP00000219689	USP31	D_nonD_CDRP	0.1675	dNdS:III_(0.15,0.3]	-0.80388	11.4603	0.008751	55.4	0.029415	40.2	50.3698
ENSP00000219746	TOX3	NonDomCDRP	0.1233	dNdS:II_(0,0.15]	-0.13653	39.6597	0.994339	8.7	0.250534	5.9	66.1458
ENSP00000219782	MAZ	NonDomCDRP	0.4757	dNdS:IV_(0.3,0.5]	-0.69831	13.9723	0.95397	14.4	0.183092	11.9	28.3976
ENSP00000219794	BCKDK	NoCDRP	0.0797	dNdS:II_(0,0.15]	-0.62902	15.8997	0.005804	57.4	0.015706	54.1	1.94175
ENSP00000219833	SLC6A2	NoCDRP	0.3184	dNdS:IV_(0.3,0.5]	-0.2799	30.6361	0.277118	36.3	0.046207	31.4	2.38854
ENSP00000219837	KNOP1	NonDomCDRP	0.4909	dNdS:IV_(0.3,0.5]	0.34381	73.0856	3.17e-05	75.1	0.008304	69.9	79.0393
ENSP00000219919	AQP9	NoCDRP	0.4404	dNdS:IV_(0.3,0.5]	0.057588	53.9214	0.446615	31.5	0.021664	46.9	3.05085
ENSP00000220062	RASL12	NoCDRP	0.0866	dNdS:II_(0,0.15]	0.053761	53.6146	0.006968	56.6	0.010977	63	5.26316
ENSP00000220166	CTSH	NoCDRP	0.0553	dNdS:II_(0,0.15]	-0.00435	49.1115	3.17e-06	80.4	0.002916	91.3	0
ENSP00000220244		NoCDRP	0.2925	dNdS:III_(0.15,0.3]							2.79206
ENSP00000220325	EHD4	NoCDRP	0.1096	dNdS:II_(0,0.15]	-1.01919	7.64021	0.001497	63	0.020109	48.6	10.3512
ENSP00000220429	GABPB1	NoCDRP	noVariation	dNdS:VII_0_0	-0.23614	33.2986	0.929888	16.1			28.1013
ENSP00000220478	SCG3	DomCDRP	0.1011	dNdS:II_(0,0.15]	-0.26695	31.4638	0.267524	36.6	0.03365	37.5	48.5043
ENSP00000220496	DNAJC17	NonDomCDRP	0.2667	dNdS:III_(0.15,0.3]	0.298641	70.4231	0.028539	50	0.021925	46.6	49.6711
ENSP00000220507	RHOV	NoCDRP	noVariation	dNdS:VII_0_0	-0.04202	46.4317	0.590312	27.7	0.083487	21.3	13.5593
ENSP00000220509	VPS18	NoCDRP	0.1197	dNdS:II_(0,0.15]	-1.06857	6.93986	0.939243	15.6	0.072026	23.4	4.62487
ENSP00000220514	OIP5	NoCDRP	1.383	dNdS:VI_>1	-0.11785	40.9157	1.54e-08	88.4	0.002813	91.7	9.17031
ENSP00000220562	EXTL3	NoCDRP	0.035	dNdS:II_(0,0.15]	-2.00312	1.6438	0.06128	45.9	0.030632	39.4	5.87595
ENSP00000220592	AGO2	NoCDRP	noVariation	dNdS:VII_0_0	-1.61872	2.77247	0.999992	2.4	0.439213	0.5	8.8475
ENSP00000220597	PAG1	DomCDRP	0.52	dNdS:V_(0.5,1]	-0.50801	19.8761	0.010837	54.6	0.011493	61.6	79.6296
ENSP00000220616	TG	NoCDRP	0.545	dNdS:V_(0.5,1]	2.67375	99.2881	2.63e-29	99.6			4.47977
ENSP00000220659	BRF2	NonDomCDRP	noVariation	dNdS:VII_0_0	-0.08769	42.982	1.88e-09	90.6	0.006755	75.2	24.821
ENSP00000220669	ZFAND1	NoCDRP	0.2394	dNdS:III_(0.15,0.3]	0.045301	53.0069	0.000588	66.5	0.002047	95	2.61194
ENSP00000220676	RP1	NonDomCDRP	0.7887	dNdS:V_(0.5,1]	0.112451	58.164	3.68e-10	92	0.006549	76	34.6475
ENSP00000220751	RIPK2	NoCDRP	0.6047	dNdS:V_(0.5,1]	-0.1244	40.4816	0.554263	28.6	0.040415	34	12.037
ENSP00000220763	CPQ	NoCDRP	0.6494	dNdS:V_(0.5,1]	0.903834	91.1559	7.3e-10	91.3	0.002003	95.2	0
ENSP00000220764	DECR1	NoCDRP	0.0992	dNdS:II_(0,0.15]	-0.04937	45.8529	1.67e-05	76.8	0.001884	95.6	0
ENSP00000220772	SFRP1	NoCDRP	0.0373	dNdS:II_(0,0.15]	-0.50721	19.9224	0.465846	31	0.066855	24.6	1.91083
ENSP00000220809	PLAT	NoCDRP	0.0728	dNdS:II_(0,0.15]	0.048474	53.2905	0.000197	69.8	0.023035	45.5	0.88968
ENSP00000220812	DKK4	NonDomCDRP	0.8235	dNdS:V_(0.5,1]	0.106282	57.6663	0.02138	51.3	0.017233	51.9	15.625
ENSP00000220822	GDAP1	NoCDRP	0.1471	dNdS:II_(0,0.15]	-0.39929	24.4834	0.000185	70.1	0.007217	73.6	12.0112
ENSP00000220849	EIF3E	NoCDRP	0	dNdS:I_0	-0.49316	20.4781	0.734232	23.6	0.045919	31.6	2.47191
ENSP00000220853	EMC2	NoCDRP	noVariation	dNdS:VII_0_0	-0.14419	39.1098	8.61e-05	72.3	0.008454	69.5	1.3468
ENSP00000220913	CHRAC1	NoCDRP	0.5899	dNdS:V_(0.5,1]	0.298493	70.4057	0.658095	25.8	0.161644	13.1	19.084
ENSP00000220940	GML	NoCDRP	0.4752	dNdS:IV_(0.3,0.5]	0.761933	88.3429	0.439135	31.7			3.16456
ENSP00000220966		NoCDRP	noVariation	dNdS:VII_0_0							5.94406
ENSP00000221086	MTMR9	NoCDRP	noVariation	dNdS:VII_0_0	-0.38111	25.3806	0.210866	38.4	0.046915	31.2	4.18944
ENSP00000221114	DCTN6	NoCDRP	noVariation	dNdS:VII_0_0	0.004915	49.8698	0.026238	50.3	0.020605	48	13.1579
ENSP00000221130	GSR	NoCDRP	0.1737	dNdS:III_(0.15,0.3]	0.317474	71.6154	0.012481	54	0.006911	74.6	4.40613
ENSP00000221132	TNFRSF10A	NonDomCDRP	0.9864	dNdS:V_(0.5,1]	0.45827	78.7347	3.93e-13	95.6			25.8547
ENSP00000221138	PPP2CB	NoCDRP	noHomolog	dNdS:VIIII_noHomolog	0.003959	49.8061	0.622506	26.9	0.050458	29.8	1.61812
ENSP00000221166	NEFM	NonDomCDRP	0.4915	dNdS:IV_(0.3,0.5]	-0.20008	35.4981	0.035956	48.8	0.038357	35	64.738
ENSP00000221200	KCTD9	NoCDRP	100.117	dNdS:VI_>1	-0.28211	30.5377	0.073397	44.8	0.023286	45.2	2.05656
ENSP00000221233	EXOSC5	NoCDRP	0.2122	dNdS:III_(0.15,0.3]	0.23766	66.684	0.001193	64	0.008133	70.4	9.78723
ENSP00000221265	PAF1	D_nonD_CDRP	200	dNdS:VI_>1	-0.17405	37.1419	0.845473	20.1	0.042142	33.2	50.4708
ENSP00000221315	ZNF432	NoCDRP	0.3613	dNdS:IV_(0.3,0.5]	-0.09695	42.299	6.81e-11	93.2	0.002235	94.2	12.4233
ENSP00000221327	ZNF180	NoCDRP	0.4118	dNdS:IV_(0.3,0.5]	0.404943	76.0896	7.36e-06	78.8	0.007034	74.2	18.3526
ENSP00000221399	TULP2	D_nonD_CDRP	1.0536	dNdS:VI_>1	1.13756	94.4145	1.83e-07	85.3			39.6154
ENSP00000221403	DHDH	NoCDRP	0.4652	dNdS:IV_(0.3,0.5]	0.886914	90.8896	3.49e-06	80.3			1.49701
ENSP00000221418	ECH1	NoCDRP	0.3468	dNdS:IV_(0.3,0.5]	-0.09247	42.6752	0.004166	58.9	0.014473	56	1.52439
ENSP00000221419	HNRNPL	D_nonD_CDRP	noVariation	dNdS:VII_0_0	-0.89738	9.64288	0.945069	15.2	0.131445	15	37.8608
ENSP00000221421	LHB	NoCDRP	0.044	dNdS:II_(0,0.15]	0.955257	92.0935	0.0656	45.5	0.017906	51	0
ENSP00000221444	KCNA7	NoCDRP	0.3516	dNdS:IV_(0.3,0.5]	-0.63556	15.7782	0.00825	55.7	0.01105	62.8	2.41228
ENSP00000221455	CLASRP	NonDomCDRP	0.0959	dNdS:II_(0,0.15]	-0.65057	15.373	0.964966	13.5	0.106015	17.7	80.5638
ENSP00000221459	LIN7B	NoCDRP	noVariation	dNdS:VII_0_0	-0.01855	48.0176	0.838837	20.3	0.058616	26.8	18.8406
ENSP00000221462		NonDomCDRP	0.0815	dNdS:II_(0,0.15]							43.8495
ENSP00000221466	FCGRT	NoCDRP	noVariation	dNdS:VII_0_0	0.111066	58.083	0.825587	20.8	0.049965	30	7.39726
ENSP00000221476	CKM	NoCDRP	noVariation	dNdS:VII_0_0	-0.25849	31.9731	0.005051	58.1	0.010045	65.2	12.5984
ENSP00000221480		NoCDRP	0.3175	dNdS:IV_(0.3,0.5]							3.3195
ENSP00000221485	SLC17A7	NonDomCDRP	0.65	dNdS:V_(0.5,1]	-0.38796	25.0507	0.995933	8	0.238896	6.8	12.5
ENSP00000221486	RNASEH2A	NoCDRP	0.2873	dNdS:III_(0.15,0.3]	0.268629	68.6288	0.050079	47	0.024461	44.1	2.34114
ENSP00000221494		NonDomCDRP	noVariation	dNdS:VII_0_0					0.081836	21.6	72.4138
ENSP00000221496		NonDomCDRP	0.2063	dNdS:III_(0.15,0.3]							23.3929
ENSP00000221498	DKKL1	NoCDRP	0.9167	dNdS:V_(0.5,1]	1.20766	95.0917	0.000105	71.7	0.007926	71.1	31.405
ENSP00000221515	RETN	NoCDRP	200	dNdS:VI_>1	-0.01392	48.3938	0.074003	44.8	0.021913	46.6	0
ENSP00000221538	RSPH6A	D_nonD_CDRP	0.1765	dNdS:III_(0.15,0.3]	0.361994	74.0117	2.55e-08	87.9	0.004604	83.6	50.2092
ENSP00000221543	TBC1D17	NonDomCDRP	0.0756	dNdS:II_(0,0.15]	-0.41958	23.5284	1.12e-12	95.2	0.006724	75.3	20.0617
ENSP00000221554	CCDC130	NonDomCDRP	0.1818	dNdS:III_(0.15,0.3]	0.290332	69.9543	0.025049	50.5	0.007551	72.5	50.2525
ENSP00000221566	SGTA	NonDomCDRP	noVariation	dNdS:VII_0_0	-0.45181	22.1971	0.470281	30.8	0.116118	16.4	34.5048
ENSP00000221573	SNAPC2	DomCDRP	0.2328	dNdS:III_(0.15,0.3]	0.229351	66.1863	0.103168	42.9	0.01587	53.8	60.479
ENSP00000221665		NonDomCDRP	0.0352	dNdS:II_(0,0.15]					0.062978	25.5	29.0323
ENSP00000221671	C19orf44	D_nonD_CDRP	0.1914	dNdS:III_(0.15,0.3]	-0.31358	28.645	4.22e-07	84	0.001625	96.6	67.5799
ENSP00000221742	SLC1A6	NoCDRP	0.0463	dNdS:II_(0,0.15]	-0.10461	41.836	0.928911	16.2	0.100614	18.6	6.56028
ENSP00000221801	FBL	NonDomCDRP	noVariation	dNdS:VII_0_0	-0.54472	18.3944	0.984496	11	0.144093	14.1	33.0218
ENSP00000221804	CLC	NoCDRP	noHomolog	dNdS:VIIII_noHomolog	0.594945	83.9787	3.42e-05	74.9	0.007446	72.8	0
ENSP00000221847	EBI3	NoCDRP	0.2794	dNdS:III_(0.15,0.3]	0.018159	50.9232	0.0196	51.8	0.00675	75.2	0.436681
ENSP00000221855	TBCB	NoCDRP	noVariation	dNdS:VII_0_0	-0.31308	28.6971	0.405522	32.6	0.044257	32.3	7.37705
ENSP00000221856	FSD1	NonDomCDRP	0.199	dNdS:III_(0.15,0.3]	-0.38972	24.9696	0.732578	23.7	0.052412	29	9.27419
ENSP00000221859	POLR2I	NoCDRP	noVariation	dNdS:VII_0_0	-0.02797	47.433	0.05416	46.5	0.015298	54.8	4
ENSP00000221891	APLP1	NonDomCDRP	0.1966	dNdS:III_(0.15,0.3]	-0.55192	18.1571	0.525927	29.3	0.027768	41.4	53.9171
ENSP00000221922	CCDC9	D_nonD_CDRP	0.321	dNdS:IV_(0.3,0.5]	0.743543	87.9493	1.57e-06	81.8	0.004796	82.8	99.8117
ENSP00000221930	TGFB1	NoCDRP	noVariation	dNdS:VII_0_0	0.07627	55.38	0.354133	34.1	0.043114	32.8	6.15385
ENSP00000221957	PLIN3	NoCDRP	0.1466	dNdS:II_(0,0.15]	0.000586	49.482	1.24e-08	88.6	0.00451	84	20.5069
ENSP00000221973	LIM2	NoCDRP	0.5195	dNdS:V_(0.5,1]	-0.36178	26.2546	0.000989	64.7	0.011479	61.6	1.86047
ENSP00000221978	NKG7	NoCDRP	2.4301	dNdS:VI_>1	0.293859	70.1221	0.004007	59.1	0.007354	73.1	0
ENSP00000221980		NoCDRP	0.1468	dNdS:II_(0,0.15]							19.0476
ENSP00000222002	SULT2A1	NoCDRP	200	dNdS:VI_>1	-0.05128	45.6908	1.39e-07	85.7	0.003979	86.4	0
ENSP00000222005	CDC37	NonDomCDRP	0.03	dNdS:II_(0,0.15]	-0.00244	49.2562	0.962358	13.7	0.064436	25.1	27.2487
ENSP00000222008	RABAC1	NoCDRP	0.4946	dNdS:IV_(0.3,0.5]	-0.21554	34.5488	0.076547	44.7	0.025225	43.5	3.24324
ENSP00000222033	ZNRF4	NonDomCDRP	0.6432	dNdS:V_(0.5,1]	1.33553	96.0178	0.263224	36.7	0.013808	57.3	14.2191
ENSP00000222122	DBP	NonDomCDRP	noVariation	dNdS:VII_0_0	0.132468	59.5879	0.820194	21	0.2451	6.3	79.6923
ENSP00000222139	EPOR	NoCDRP	0.7077	dNdS:V_(0.5,1]	-0.03149	47.2189	0.058451	46.1	0.008288	70	16.3386
ENSP00000222145	RASIP1	NonDomCDRP	0.2222	dNdS:III_(0.15,0.3]	-0.12057	40.6899	0.975494	12.4	0.203314	10.2	38.9408
ENSP00000222212	CACNG7	NoCDRP	noVariation	dNdS:VII_0_0	-0.23422	33.4201	0.712701	24.3	0.090086	20.2	0.363636
ENSP00000222214	GCDH	NoCDRP	0.3206	dNdS:IV_(0.3,0.5]	-0.28564	30.3062	0.335283	34.7	0.012576	59.5	5.02283
ENSP00000222219	DNASE2	NoCDRP	0.1818	dNdS:III_(0.15,0.3]	0.17109	62.5977	0.053733	46.6	0.027929	41.3	5.55556
ENSP00000222224	LENG1	NonDomCDRP	1.8025	dNdS:VI_>1	0.62047	84.7601	2.63e-09	90.3	0.004682	83.2	95.8333
ENSP00000222247	RPL18A	NoCDRP	noVariation	dNdS:VII_0_0	-0.10859	41.5581	0.963491	13.6	0.210409	9.5	5.11364
ENSP00000222248	SLC5A5	NoCDRP	0.2044	dNdS:III_(0.15,0.3]	-0.88781	9.84546	0.740011	23.5	0.015002	55.2	6.53188
ENSP00000222250	ARRDC2	NoCDRP	0.1495	dNdS:II_(0,0.15]	0.072745	55.108	5.13e-05	73.8	0.006316	77	9.33661
ENSP00000222256	RAB3A	NoCDRP	noVariation	dNdS:VII_0_0	-0.41158	23.8467	0.870968	19	0.255112	5.5	10.9091
ENSP00000222266	PSENEN	NoCDRP	noVariation	dNdS:VII_0_0	0.038604	52.4512	0.535695	29	0.076951	22.4	0
ENSP00000222271		DomCDRP	0.261	dNdS:III_(0.15,0.3]							29.0621
ENSP00000222284	TMEM147	NoCDRP	0.2017	dNdS:III_(0.15,0.3]	-0.3581	26.3935	0.137955	41.2	0.021525	47	0
ENSP00000222286	GAPDHS	NonDomCDRP	0.3701	dNdS:IV_(0.3,0.5]	0.144904	60.595	0.135772	41.3	0.026919	42	18.3824
ENSP00000222329	ERF	NonDomCDRP	0.0317	dNdS:II_(0,0.15]	-0.83624	10.8584	0.807144	21.4	0.122474	15.7	68.6131
ENSP00000222339	ZNF574	NonDomCDRP	0.4496	dNdS:IV_(0.3,0.5]	-0.54045	18.5507	0.908435	17.4	0.155524	13.4	37.4239
ENSP00000222345	SIPA1L3	D_nonD_CDRP	0.0765	dNdS:II_(0,0.15]	0.238108	66.6956	0.999677	4.7	0.050477	29.7	61.8754
ENSP00000222374	CADM4	NoCDRP	0.6439	dNdS:V_(0.5,1]	-0.30175	29.357	0.979492	11.8	0.221841	8.4	5.92784
ENSP00000222381	PON1	NoCDRP	0.381	dNdS:IV_(0.3,0.5]	0.921563	91.5263	0.002209	61.5	0.002716	92.1	0
ENSP00000222382	CYP3A43	NoCDRP	0.4474	dNdS:IV_(0.3,0.5]	0.313798	71.3203	1.47e-10	92.7	0.003305	89.6	0.198413
ENSP00000222388	ABCF2	NonDomCDRP	0.129	dNdS:II_(0,0.15]	-1.32413	4.52625	0.995417	8.2	0.137188	14.5	12.6183
ENSP00000222390	HGF	NoCDRP	0.4667	dNdS:IV_(0.3,0.5]	-1.08673	6.69676	0.994701	8.5	0.078658	22.1	1.37363
ENSP00000222402	UBE2D4	NoCDRP	0.5907	dNdS:V_(0.5,1]	-0.01951	47.9481	0.002319	61.4	0.008902	68.1	4.08163
ENSP00000222462	WNT16	NoCDRP	0.1902	dNdS:III_(0.15,0.3]	-0.44798	22.3824	0.000185	70.1	0.014006	56.9	4.38356
ENSP00000222481	CPA2	NoCDRP	0.1279	dNdS:II_(0,0.15]	0.152407	61.1854	1.74e-08	88.3	0.003523	88.6	1.67064
ENSP00000222482	CPA4	NoCDRP	0.2772	dNdS:III_(0.15,0.3]	0.563314	82.85	3.55e-07	84.3			7.36342
ENSP00000222511	GTPBP10	NoCDRP	0.215	dNdS:III_(0.15,0.3]	0.407511	76.2285	0.130731	41.5	0.002307	93.9	6.20155
ENSP00000222543	TFPI2	NoCDRP	0.0865	dNdS:II_(0,0.15]	0.577215	83.3247	0.237366	37.5	0.004348	84.7	0
ENSP00000222553	NAMPT	NoCDRP	0.3166	dNdS:IV_(0.3,0.5]	-0.28866	30.1673	0.982566	11.4	0.12202	15.7	1.222
ENSP00000222567	TWISTNB	NonDomCDRP	0.0461	dNdS:II_(0,0.15]	0.207648	64.9071	0.309424	35.5	0.042873	32.9	40.5325
ENSP00000222573	ITGB8	NoCDRP	0.1293	dNdS:II_(0,0.15]	-0.48248	20.8775	0.998351	6.7	0.210615	9.5	0.520156
ENSP00000222584	SP4	NonDomCDRP	noVariation	dNdS:VII_0_0	-0.58289	17.312	0.951288	14.6	0.098283	19	48.3418
ENSP00000222598	DLX5	D_nonD_CDRP	noVariation	dNdS:VII_0_0	-0.49779	20.3044	0.67598	25.3	0.044231	32.3	51.9031
ENSP00000222674	NPVF	NoCDRP	1.0938	dNdS:VI_>1	0.68035	86.427	0.00264	60.9	0.005124	81.6	23.4694
ENSP00000222693	CAV2	NoCDRP	noVariation	dNdS:VII_0_0	0.238468	66.7535	0.004116	59	0.006761	75.1	0.617284
ENSP00000222718	HOXA2	NonDomCDRP	noVariation	dNdS:VII_0_0	-0.17979	36.7599	0.278338	36.2	0.014557	55.9	54.5213
ENSP00000222725	LFNG	NoCDRP	0.2135	dNdS:III_(0.15,0.3]	0.43289	77.5482	0.424039	32.2	0.04831	30.6	10.0264
ENSP00000222726	HOXA5	NonDomCDRP	0.4697	dNdS:IV_(0.3,0.5]	-0.46219	21.7862	0.796213	21.8	0.233697	7.3	64.8148
ENSP00000222728	HOXA6	NonDomCDRP	noVariation	dNdS:VII_0_0	-0.29425	29.7447	1.8e-05	76.5	0.009614	66.2	27.0386
ENSP00000222747	TSPAN12	NoCDRP	noVariation	dNdS:VII_0_0	0.046258	53.1053	0.554921	28.5	0.053381	28.6	1.31148
ENSP00000222753		NoCDRP	0.0472	dNdS:II_(0,0.15]							20.8763
ENSP00000222792	CHN2	NoCDRP	noVariation	dNdS:VII_0_0	-0.87008	10.1812	0.025502	50.4	0.027376	41.7	6.62393
ENSP00000222800	ABHD11	NoCDRP	noVariation	dNdS:VII_0_0	-0.52589	19.1584	9.03e-06	78.3	0.008829	68.3	14.2857
ENSP00000222803	FKBP14	NoCDRP	noVariation	dNdS:VII_0_0	-0.2521	32.3262	4.19e-05	74.3	0.008807	68.4	1.4218
ENSP00000222812	STX1A	NoCDRP	noVariation	dNdS:VII_0_0	-0.28866	30.1673	0.910476	17.3	0.105409	17.9	33.3333
ENSP00000222823	NOD1	NoCDRP	0.0742	dNdS:II_(0,0.15]	0.703632	86.9653	5.05e-13	95.5	0.008376	69.7	1.36411
ENSP00000222902	CCL24	NoCDRP	0.3244	dNdS:IV_(0.3,0.5]	0.230008	66.2383	0.017189	52.4	0.002755	91.9	0
ENSP00000222968	PDAP1	D_nonD_CDRP	noVariation	dNdS:VII_0_0	-0.01855	48.0176	0.005589	57.6	0.023811	44.7	0
ENSP00000222969	BUD31	NoCDRP	noVariation	dNdS:VII_0_0	-0.20996	34.9077	0.41701	32.3	0.054895	28	10.4167
ENSP00000222982	CYP3A5	NoCDRP	0.6977	dNdS:V_(0.5,1]	0.031403	51.9477	5.21e-11	93.3			1.39442
ENSP00000222990	SNX8	NonDomCDRP	0.0641	dNdS:II_(0,0.15]	-1.00514	7.78492	0.165171	39.9	0.017774	51.2	18.7097
ENSP00000223023	WASL	D_nonD_CDRP	noVariation	dNdS:VII_0_0	-0.47337	21.3058	0.96196	13.8	0.08484	21	73.0693
ENSP00000223026	HYAL4	NoCDRP	0.242	dNdS:III_(0.15,0.3]	0.655266	85.7961	2.05e-15	97.1			0
ENSP00000223029	AIMP2	NoCDRP	0.7881	dNdS:V_(0.5,1]	-0.02766	47.4562	0.001463	63.1	0.004978	82.1	6.5625
ENSP00000223051	TFR2	NoCDRP	0.1528	dNdS:III_(0.15,0.3]	0.646958	85.5473	0.000139	70.9	0.017747	51.2	10.362
ENSP00000223061	PCOLCE	NonDomCDRP	0.1681	dNdS:III_(0.15,0.3]	0.311884	71.1929	0.500665	29.9	0.044827	32.1	22.7171
ENSP00000223073	RBM28	NonDomCDRP	noVariation	dNdS:VII_0_0	0.156387	61.4922	2.05e-09	90.5	0.011461	61.7	45.8498
ENSP00000223095	SERPINE1	NoCDRP	200	dNdS:VI_>1	0.046409	53.1227	0.21952	38	0.015521	54.4	0
ENSP00000223122	C1GALT1	NonDomCDRP	0.2182	dNdS:III_(0.15,0.3]	-0.6263	15.9866	0.67938	25.2	0.09171	20	13.2231
ENSP00000223127	PLOD3	NoCDRP	0.1295	dNdS:II_(0,0.15]	0.973592	92.3598	3.88e-08	87.3	0.011099	62.7	2.43902
ENSP00000223129	RPA3	NoCDRP	0.79	dNdS:V_(0.5,1]	-0.315	28.5293	7.56e-05	72.7	0.00329	89.7	1.65289
ENSP00000223145	GLCCI1	D_nonD_CDRP	0.5818	dNdS:V_(0.5,1]	-0.63939	15.703	0.245282	37.2	0.077905	22.2	80.8044
ENSP00000223167	MYL10	NoCDRP	noVariation	dNdS:VII_0_0	0.120331	58.7428	0.008047	55.9	0.007263	73.4	8.40708
ENSP00000223208	CEP41	NonDomCDRP	0.1057	dNdS:II_(0,0.15]	0.43002	77.4209	0.000126	71.2	0.006935	74.5	51.2064
ENSP00000223210	ZNF862	NoCDRP	0.1389	dNdS:II_(0,0.15]	0.441015	77.9244	3.69e-09	89.9			11.2062
ENSP00000223215	MEST	NoCDRP	noVariation	dNdS:VII_0_0	-0.15265	38.5252	0.997527	7.2	0.26865	4.6	0
ENSP00000223273	YAE1D1	NoCDRP	1.0465	dNdS:VI_>1	0.438332	77.8029	0.125673	41.8	0.010668	63.8	3.09735
ENSP00000223293	GIMAP2	NoCDRP	0.2794	dNdS:III_(0.15,0.3]	0.464667	79.0704	0.001228	63.9	0.001501	97.2	4.45104
ENSP00000223321	PSMA2	NoCDRP	noVariation	dNdS:VII_0_0	-0.28499	30.3293	0.937475	15.8	0.108289	17.4	0
ENSP00000223324	MRPL32	NoCDRP	0.6555	dNdS:V_(0.5,1]	0.446791	78.1964	0.001291	63.7			23.9362
ENSP00000223357	AEBP1	D_nonD_CDRP	0.2222	dNdS:III_(0.15,0.3]	-0.56841	17.694	0.000219	69.6	0.015361	54.7	48.9637
ENSP00000223366	GCK	NoCDRP	0.2112	dNdS:III_(0.15,0.3]	-0.97146	8.36372	0.204306	38.6	0.034051	37.2	4.07725
ENSP00000223369	YKT6	NoCDRP	noHomolog	dNdS:VIIII_noHomolog	0.110915	58.0598	0.852902	19.8	0.103302	18.2	6.56566
ENSP00000223428	ZNF510	NonDomCDRP	0.7029	dNdS:V_(0.5,1]	0.431128	77.4729	2.36e-09	90.4	0.003171	90.3	20.205
ENSP00000223459	ZNF688	NonDomCDRP	noVariation	dNdS:VII_0_0	-0.17229	37.2345	7.09e-05	72.9	0.004441	84.2	65.942
ENSP00000223500	CHMP5	DomCDRP	noVariation	dNdS:VII_0_0	-0.30558	29.1486	0.259055	36.8	0.021153	47.4	60.274
ENSP00000223528	FKTN	NoCDRP	0.2804	dNdS:III_(0.15,0.3]	0.029489	51.7393	0.000192	69.9	0.011082	62.7	0
ENSP00000223641	SEC61B	NonDomCDRP	noVariation	dNdS:VII_0_0	0.031101	51.8956	0.74284	23.4	0.203741	10.1	52.0833
ENSP00000223642	C5	NoCDRP	0.3301	dNdS:IV_(0.3,0.5]	-0.9829	8.18429	5.61e-11	93.3	0.011708	61.1	1.67064
ENSP00000223795	TNFSF8	NoCDRP	noVariation	dNdS:VII_0_0	0.044344	52.9085	0.852777	19.8	0.246175	6.2	5.12821
ENSP00000223836	AK1	NoCDRP	0.7523	dNdS:V_(0.5,1]	0.141884	60.3114	0.654809	25.9	0.019258	49.5	20.9524
ENSP00000223862	RLN1	NoCDRP	0.3947	dNdS:IV_(0.3,0.5]	0.606272	84.3434	0.000529	66.9	0.005549	79.9	6.48649
ENSP00000223864	PLGRKT	NoCDRP	noVariation	dNdS:VII_0_0	0.035884	52.2892	8.36e-08	86.3	0.00237	93.6	0
ENSP00000224073	EDF1	DomCDRP	noVariation	dNdS:VII_0_0	-0.04106	46.5359	0.908577	17.4	0.270952	4.4	75.6757
ENSP00000224140	SETX	NonDomCDRP	0.4923	dNdS:IV_(0.3,0.5]	-1.2854	4.79829	0.20025	38.7	0.034267	37.1	33.5824
ENSP00000224181	C8G	NoCDRP	200	dNdS:VI_>1	0.956213	92.1167	1.63e-09	90.7			8.91089
ENSP00000224337	BLNK	NonDomCDRP	0.3587	dNdS:IV_(0.3,0.5]	0.317474	71.6154	0.990011	9.9	0.079647	22	77.193
ENSP00000224356	CYP26A1	NoCDRP	0.1667	dNdS:III_(0.15,0.3]	-0.7387	12.9421	6.64e-05	73.1	0.012676	59.3	0.603622
ENSP00000224652	ATE1	NonDomCDRP	0.4098	dNdS:IV_(0.3,0.5]	-0.13366	39.8507	0.511357	29.6	0.042379	33.1	27.027
ENSP00000224721	CDH23	NoCDRP	0.1617	dNdS:III_(0.15,0.3]	-1.30264	4.68831	0.050693	46.9	0.031652	38.7	8.27627
ENSP00000224784	ACTA2	NoCDRP	noHomolog	dNdS:VIIII_noHomolog	-0.26711	31.4175	0.734223	23.6	0.057633	27.2	3.44828
ENSP00000224807	SFXN3	NoCDRP	0.2291	dNdS:III_(0.15,0.3]	-0.04186	46.4548	1.27e-11	94.1	0.001239	98	0
ENSP00000224862	FBXL15	NoCDRP	0.0693	dNdS:II_(0,0.15]	0.063983	54.4886	0.002101	61.7			4.66667
ENSP00000224950		NoCDRP	0.5286	dNdS:V_(0.5,1]							1.3587
ENSP00000225174	PPIF	NoCDRP	0.113	dNdS:II_(0,0.15]	0.618411	84.7196	0.005186	57.9	0.002464	93.1	3.86473
ENSP00000225235	TBC1D12	NonDomCDRP	noVariation	dNdS:VII_0_0	-0.41989	23.5168	0.002644	60.9	0.024958	43.7	48.129
ENSP00000225275	MPO	NoCDRP	0.1628	dNdS:III_(0.15,0.3]	-0.12027	40.7073	1.75e-09	90.7			1.74497
ENSP00000225276	ST6GALNAC2	NoCDRP	0.1823	dNdS:III_(0.15,0.3]	0.08201	55.9	4.43e-08	87.1	0.002692	92.2	0
ENSP00000225296	DHX33	NonDomCDRP	0.2237	dNdS:III_(0.15,0.3]	0.248337	67.367	0.008382	55.7	0.015079	55.1	12.1641
ENSP00000225298	UTP18	NonDomCDRP	noHomolog	dNdS:VIIII_noHomolog	-0.61305	16.3917	0.415445	32.4	0.037502	35.4	39.2086
ENSP00000225371	EPX	NoCDRP	0.1145	dNdS:II_(0,0.15]	1.37146	96.2378	6.21e-10	91.6			0.979021
ENSP00000225387	CRYBA1	NoCDRP	0.0792	dNdS:II_(0,0.15]	0.006829	50.0203	0.000722	65.9	0.013726	57.4	13.0233
ENSP00000225388	NUFIP2	D_nonD_CDRP	0.3571	dNdS:IV_(0.3,0.5]	-0.74988	12.6353	0.992086	9.4	0.259482	5.2	73.0935
ENSP00000225430	RPL19	D_nonD_CDRP	noVariation	dNdS:VII_0_0	0.322915	71.928	0.974448	12.5	0.20571	9.9	42.3469
ENSP00000225474	CSF3	NoCDRP	0.11	dNdS:II_(0,0.15]	0.467389	79.2036	0.480556	30.6	0.064354	25.1	0.966184
ENSP00000225504	SUPT4H1	NoCDRP	noVariation	dNdS:VII_0_0	-0.00641	48.9611	0.338447	34.6	0.043272	32.7	0
ENSP00000225512	WNT3	NoCDRP	noVariation	dNdS:VII_0_0	-0.55318	18.1166	0.946108	15.2	0.300731	2.9	5.07042
ENSP00000225519	SHPK	NoCDRP	0.1754	dNdS:III_(0.15,0.3]	-0.0398	46.6343	3.97e-06	80	0.00199	95.3	3.55649
ENSP00000225525	TAX1BP3	NoCDRP	0.4096	dNdS:IV_(0.3,0.5]	-0.14147	39.3124	0.002348	61.3	0.008876	68.2	20.1613
ENSP00000225538	P2RX1	NoCDRP	0.0542	dNdS:II_(0,0.15]	-0.19001	36.181	6.47e-08	86.7	0.007135	73.9	0.501253
ENSP00000225550	KRT37	NoCDRP	0.1861	dNdS:III_(0.15,0.3]	1.1085	94.0325	0.000454	67.3			5.12249
ENSP00000225576	TVP23C	NoCDRP	noHomolog	dNdS:VIIII_noHomolog	0.269586	68.6867	0.000137	71	0.005644	79.5	12.6812
ENSP00000225577	RPS6KB1	NonDomCDRP	noVariation	dNdS:VII_0_0	-0.62071	16.166	0.998223	6.7	0.206788	9.8	27.4286
ENSP00000225609	PIGL	NoCDRP	200	dNdS:VI_>1	0.457164	78.6653	3.55e-05	74.8	0.004686	83.2	0.396825
ENSP00000225614	GALK1	NoCDRP	noVariation	dNdS:VII_0_0	-0.03245	47.1378	0.000941	65	0.013882	57.1	4.33673
ENSP00000225665	SLC25A11	NoCDRP	noVariation	dNdS:VII_0_0	-0.54472	18.3944	0.666467	25.6	0.036843	35.7	1.59236
ENSP00000225688	RASD1	NoCDRP	noVariation	dNdS:VII_0_0	-0.25865	31.9558	0.060716	45.9	0.008515	69.3	2.84698
ENSP00000225698	C1QBP	NoCDRP	0.136	dNdS:II_(0,0.15]	0.103412	57.4579	0.07205	44.9	0.01511	55	19.5035
ENSP00000225719	CPD	DomCDRP	0.3254	dNdS:IV_(0.3,0.5]	-0.78342	11.9002	0.247132	37.2	0.026853	42.1	20.2174
ENSP00000225726	CCDC47	D_nonD_CDRP	noVariation	dNdS:VII_0_0	-0.39546	24.6455	0.002588	61	0.016121	53.5	42.4431
ENSP00000225728	MED31	NoCDRP	noVariation	dNdS:VII_0_0	-0.03643	46.8253	0.000283	68.8	0.008488	69.3	6.10687
ENSP00000225729	DRG2	NoCDRP	noVariation	dNdS:VII_0_0	-0.46586	21.6299	0.148077	40.7	0.019866	48.8	0.824176
ENSP00000225737	AKAP10	NonDomCDRP	0.1595	dNdS:III_(0.15,0.3]	-0.07827	43.8	0.932283	16	0.063491	25.4	30.9668
ENSP00000225823	ASIC2	NoCDRP	0.2968	dNdS:III_(0.15,0.3]	-0.69272	14.1576	0.989196	10.1	0.140814	14.3	9.76909
ENSP00000225831	CCL2	NoCDRP	noVariation	dNdS:VII_0_0	0.228095	66.111	0.667686	25.6	0.173435	12.5	14.1414
ENSP00000225842	CCL1	NoCDRP	0.3368	dNdS:IV_(0.3,0.5]	0.206542	64.7624	0.063041	45.7	0.017697	51.3	0
ENSP00000225844	CCL13	NoCDRP	noHomolog	dNdS:VIIII_noHomolog	0.502037	80.5117	0.051133	46.9	0.004185	85.5	0
ENSP00000225873	PEX12	NoCDRP	0.7778	dNdS:V_(0.5,1]	0.139164	60.1378	3.7e-12	94.8	0.002823	91.7	2.78552
ENSP00000225899	KRT32	NoCDRP	0.4324	dNdS:IV_(0.3,0.5]	1.66764	97.8005	1.21e-15	97.2	0.003118	90.5	4.01786
ENSP00000225916	KAT2A	NonDomCDRP	0.1307	dNdS:II_(0,0.15]	-1.05017	7.2119	0.408332	32.5	0.040324	34	20.908
ENSP00000225927	NAGLU	NoCDRP	0.048	dNdS:II_(0,0.15]	-0.76584	12.2938	0.000404	67.7	0.021096	47.5	0.269179
ENSP00000225929	HSD17B1	NonDomCDRP	0.3491	dNdS:IV_(0.3,0.5]	-0.41047	23.9336	0.056018	46.4	0.020559	48.1	12.766
ENSP00000225941	ABI3	NonDomCDRP	0.1532	dNdS:III_(0.15,0.3]	0.520058	81.2583	0.027711	50.1	0.016678	52.8	45.9016
ENSP00000225964	COL1A1	D_nonD_CDRP	noVariation	dNdS:VII_0_0	-1.4165	3.8259	1	0.6	0.098948	18.9	81.0792
ENSP00000225969	MRPL27	NoCDRP	0.369	dNdS:IV_(0.3,0.5]	0.438332	77.8029	0.385345	33.2	0.050325	29.8	13.5135
ENSP00000225972	LRRC59	NonDomCDRP	noVariation	dNdS:VII_0_0	-0.01568	48.2317	0.482145	30.5	0.049726	30.1	33.8762
ENSP00000225983	HDAC5	D_nonD_CDRP	0.0449	dNdS:II_(0,0.15]	-1.36887	4.15581	0.999808	4.3	0.156165	13.4	53.6064
ENSP00000226004	DUSP3	NoCDRP	noVariation	dNdS:VII_0_0	-0.04952	45.8239	0.736745	23.5	0.233858	7.2	0.540541
ENSP00000226021	CACNG1	NoCDRP	200	dNdS:VI_>1	-0.1038	41.8881	4.78e-07	83.8	0.004776	82.8	0
ENSP00000226067	HLF	NonDomCDRP	noVariation	dNdS:VII_0_0	-0.59261	16.93	0.877862	18.7	0.261403	5.1	68.4746
ENSP00000226091	EFNB3	NonDomCDRP	0.4568	dNdS:IV_(0.3,0.5]	-0.47624	21.1842	0.456671	31.2	0.056165	27.6	40.5882
ENSP00000226105	RANGRF	NoCDRP	0.1014	dNdS:II_(0,0.15]	-0.09917	42.1543	0.020763	51.4			11.828
ENSP00000226193	RCVRN	NoCDRP	noVariation	dNdS:VII_0_0	0.136294	59.9525	2.96e-07	84.6	0.002852	91.5	4
ENSP00000226207	MYH1	DomCDRP	0.0815	dNdS:II_(0,0.15]	0.451104	78.3932	1.29e-29	99.7			31.8205
ENSP00000226218	VTN	NonDomCDRP	0.1737	dNdS:III_(0.15,0.3]	-0.03325	47.0626	1.14e-09	91.1	0.005834	78.8	26.3598
ENSP00000226225	TNFAIP1	NoCDRP	200	dNdS:VI_>1	-0.05032	45.7545	0.007362	56.4	0.018651	50.3	9.49367
ENSP00000226230	TMEM97	NoCDRP	0.5701	dNdS:V_(0.5,1]	0.164393	62.1057	0.028406	50	0.008393	69.6	0
ENSP00000226247	FOXN1	NonDomCDRP	0.8776	dNdS:V_(0.5,1]	0.444373	78.0749	0.969498	13.1	0.126372	15.3	58.3333
ENSP00000226253	ALDOC	NoCDRP	0.5185	dNdS:V_(0.5,1]	-0.20134	35.4055	0.790721	22	0.043073	32.8	4.12088
ENSP00000226279	CD38	NoCDRP	0.5098	dNdS:V_(0.5,1]	0.502183	80.529	7.66e-05	72.7	0.000921	99	0.666667
ENSP00000226284	IBSP	DomCDRP	0.4147	dNdS:IV_(0.3,0.5]	0.428107	77.3051	7.13e-08	86.5	0.00698	74.4	82.9653
ENSP00000226317	CXCL6	NoCDRP	200	dNdS:VI_>1	-0.08704	43.0341	0.000196	69.8	0.004722	83	3.50877
ENSP00000226355	AFM	NoCDRP	0.7143	dNdS:V_(0.5,1]	0.706027	87.0464	2.51e-12	94.9			0.66778
ENSP00000226359	AFP	NoCDRP	0.3421	dNdS:IV_(0.3,0.5]	-0.0473	46.0381	4.9e-05	73.9			0.482315
ENSP00000226382	PHOX2B	NonDomCDRP	noVariation	dNdS:VII_0_0	-0.2521	32.3262	0.850788	19.9	0.235674	7.1	48.7261
ENSP00000226413	GNRHR	NoCDRP	0.2251	dNdS:III_(0.15,0.3]	0.101649	57.3537	0.013968	53.5	0.020511	48.1	2.43902
ENSP00000226432	CWH43	NoCDRP	0.5957	dNdS:V_(0.5,1]	-1.26859	4.94299	5.77e-15	96.8	0.00395	86.6	2.43205
ENSP00000226444	SULT1E1	NoCDRP	0.0673	dNdS:II_(0,0.15]	0.068767	54.778	7.4e-05	72.8	0.005991	78.1	2.04082
ENSP00000226460	SMR3A	D_nonD_CDRP	200	dNdS:VI_>1	0.298493	70.4057	0.039055	48.4	0.006019	78	81.3433
ENSP00000226524	PF4V1	NoCDRP	0.6091	dNdS:V_(0.5,1]	0.161523	61.88	0.006892	56.7	0.005799	78.9	0.961538
ENSP00000226574	NFKB1	NonDomCDRP	noVariation	dNdS:VII_0_0	-0.65505	15.2052	0.99426	8.7	0.055019	28	21.5686
ENSP00000226578	MANBA	NoCDRP	0.2013	dNdS:III_(0.15,0.3]	0.070178	54.9054	1.15e-11	94.2	0.006844	74.9	0.341297
ENSP00000226730	IL2	NoCDRP	noVariation	dNdS:VII_0_0	-0.05143	45.6561	0.784778	22.2	0.209805	9.6	0
ENSP00000226798	FRG1	NoCDRP	noVariation	dNdS:VII_0_0	2.68848	99.3054	3.67e-06	80.1	0.00354	88.5	18.6047
ENSP00000226951	CLNK	NonDomCDRP	0.614	dNdS:V_(0.5,1]	0.34094	72.9409	1.35e-20	98.8	0.002437	93.2	52.3364
ENSP00000227135	SPA17	NonDomCDRP	noVariation	dNdS:VII_0_0	0.042431	52.7406	0.006263	57	0.004337	84.7	65.5629
ENSP00000227155	CD82	NoCDRP	0.0607	dNdS:II_(0,0.15]	0.238617	66.7651	0.004962	58.1	0.007987	70.9	1.49813
ENSP00000227163	SPI1	NonDomCDRP	0.5217	dNdS:V_(0.5,1]	-0.24651	32.6561	0.897231	17.9	0.243613	6.4	43.9114
ENSP00000227266	CTSC	NoCDRP	0.5217	dNdS:V_(0.5,1]	-0.42356	23.4011	0.000817	65.5	0.016284	53.3	2.59179
ENSP00000227322		NonDomCDRP	0.3659	dNdS:IV_(0.3,0.5]							40.7407
ENSP00000227348	CRTAM	DomCDRP	0.2356	dNdS:III_(0.15,0.3]	-0.10652	41.7086	1.15e-06	82.4	0.005487	80.2	24.9364
ENSP00000227451	DTX4	NonDomCDRP	0.5833	dNdS:V_(0.5,1]	-0.70773	13.7061	0.594144	27.6	0.024858	43.8	33.1179
ENSP00000227471		NonDomCDRP	0.0728	dNdS:II_(0,0.15]							17.5879
ENSP00000227507	CCND1	NoCDRP	noVariation	dNdS:VII_0_0	-0.73422	13.0347	0.238186	37.4	0.030605	39.4	8.47458
ENSP00000227520	CCDC86	D_nonD_CDRP	0.242	dNdS:III_(0.15,0.3]	0.060458	54.1471	0.001477	63.1	0.004399	84.5	0
ENSP00000227524	PRPF19	NoCDRP	noVariation	dNdS:VII_0_0	-0.23981	33.0902	0.998567	6.4	0.260647	5.1	7.93651
ENSP00000227525	TMEM109	NoCDRP	0.4556	dNdS:IV_(0.3,0.5]	-0.09071	42.7447	0.051891	46.8	0.005171	81.4	0.823045
ENSP00000227638	PANX1	NonDomCDRP	0.5464	dNdS:V_(0.5,1]	-0.39164	24.8886	0.003095	60.2	0.0073	73.3	9.15493
ENSP00000227752	IL10RA	NonDomCDRP	0.2941	dNdS:III_(0.15,0.3]	0.953639	92.0704	0.968346	13.2	0.115556	16.4	31.3149
ENSP00000227756	GALNT18	NoCDRP	noVariation	dNdS:VII_0_0	-0.68794	14.2675	0.047685	47.3	0.021148	47.4	2.80066
ENSP00000227758	BIRC2	NoCDRP	0.0795	dNdS:II_(0,0.15]	-0.55575	18.0587	0.404456	32.6	0.009149	67.3	8.25243
ENSP00000227868	PDHX	NonDomCDRP	0.2794	dNdS:III_(0.15,0.3]	0.870144	90.6002	0.00137	63.5	0.015599	54.3	22.7545
ENSP00000227880	SLC15A3	NoCDRP	0.139	dNdS:II_(0,0.15]	0.58678	83.753	3.66e-07	84.2	0.005512	80.1	3.95869
ENSP00000228027	DGAT2	NoCDRP	noVariation	dNdS:VII_0_0	0.491002	80.1296	7.51e-08	86.5	0.001474	97.3	1.80412
ENSP00000228136	C11orf58	D_nonD_CDRP	noHomolog	dNdS:VIIII_noHomolog	-0.11146	41.3845	0.709037	24.4	0.089253	20.4	99.4536
ENSP00000228251	YBX3	NonDomCDRP	1.0096	dNdS:VI_>1	0.82593	89.6741	0.006628	56.8	0.011451	61.7	90.5914
ENSP00000228280	KITLG	NoCDRP	noVariation	dNdS:VII_0_0	-0.29616	29.6579	0.50853	29.7	0.012061	60.4	11.3553
ENSP00000228284	SART3	D_nonD_CDRP	0.0833	dNdS:II_(0,0.15]	-1.23748	5.2266	0.991709	9.5	0.062739	25.6	31.0488
ENSP00000228318	SLC25A3	NoCDRP	noVariation	dNdS:VII_0_0	-0.68633	14.3312	0.071558	45	0.037599	35.3	6.07735
ENSP00000228347	POLR3B	NoCDRP	noVariation	dNdS:VII_0_0	-1.24225	5.17451	2.73e-09	90.2	0.011778	60.9	4.67785
ENSP00000228434	CD69	NoCDRP	0.275	dNdS:III_(0.15,0.3]	0.080903	55.8141	0.018883	52	0.028253	41	7.03518
ENSP00000228437	PRDM4	NonDomCDRP	0.1263	dNdS:II_(0,0.15]	-1.23298	5.27869	0.833197	20.5	0.009381	66.8	26.5918
ENSP00000228438	CLEC2B	NoCDRP	noVariation	dNdS:VII_0_0	0.237511	66.6609	0.002732	60.8	0.010581	64	0
ENSP00000228463	SELPLG	NonDomCDRP	0.7119	dNdS:V_(0.5,1]	1.07833	93.7258	0.004954	58.1	0.00614	77.6	62.8505
ENSP00000228468	ASIC1	NoCDRP	noVariation	dNdS:VII_0_0	-1.06054	7.06141	0.988325	10.3	0.070204	23.9	1.91638
ENSP00000228476	DAO	NoCDRP	0.4621	dNdS:IV_(0.3,0.5]	0.294965	70.1974	9.26e-15	96.7	0.002074	94.9	4.32277
ENSP00000228495	KCTD10	NoCDRP	noHomolog	dNdS:VIIII_noHomolog	-0.14978	38.7625	0.17267	39.6	0.050685	29.7	7.66773
ENSP00000228506	MLEC	NonDomCDRP	noVariation	dNdS:VII_0_0	-0.18457	36.4762	0.470921	30.8	0.050875	29.6	15.411
ENSP00000228515	CSRNP2	NonDomCDRP	0.3519	dNdS:IV_(0.3,0.5]	-0.14595	39.0056	0.950516	14.7	0.125455	15.4	38.1215
ENSP00000228534	IL23A	NoCDRP	noVariation	dNdS:VII_0_0	-0.26902	31.3133	0.842438	20.2	0.24277	6.5	16.4021
ENSP00000228567	SYT10	NoCDRP	0.1063	dNdS:II_(0,0.15]	0.109303	57.9499	0.123247	41.9	0.024512	44	17.782
ENSP00000228606	CYP27B1	NoCDRP	0.1234	dNdS:II_(0,0.15]	-0.47417	21.2479	3.6e-06	80.2	0.012474	59.7	7.48031
ENSP00000228641	MYF6	DomCDRP	noVariation	dNdS:VII_0_0	0.734786	87.6946	0.076286	44.7	0.007778	71.7	27.2727
ENSP00000228644	MYF5	NoCDRP	noVariation	dNdS:VII_0_0	-0.59725	16.7564	0.001903	62	0.012315	59.9	25.098
ENSP00000228682	GLI1	NonDomCDRP	0.5417	dNdS:V_(0.5,1]	-0.89025	9.78758	1.95e-06	81.3	0.0128	59	77.9385
ENSP00000228705	PPM1H	NonDomCDRP	noVariation	dNdS:VII_0_0	-0.18442	36.4936	0.855024	19.7	0.048948	30.4	17.5097
ENSP00000228740	LTA4H	NoCDRP	noVariation	dNdS:VII_0_0	-0.96108	8.53157	0.049422	47.1	0.019503	49.2	2.94599
ENSP00000228741	ELK3	NoCDRP	0.1071	dNdS:II_(0,0.15]	0.139315	60.1551	0.101741	43	0.021585	46.9	23.3415
ENSP00000228799	ITFG2	NoCDRP	0.1226	dNdS:II_(0,0.15]	-0.76599	12.2822	1.39e-06	82.1	0.006751	75.2	8.50112
ENSP00000228820	PARP11	NoCDRP	200	dNdS:VI_>1	-0.84773	10.6095	0.000159	70.5	0.005731	79.2	2.36686
ENSP00000228825	ARPC3	NoCDRP	noVariation	dNdS:VII_0_0	0.223461	65.839	0.931507	16	0.260603	5.1	2.80899
ENSP00000228837	FGF6	NoCDRP	0.2292	dNdS:III_(0.15,0.3]	0.139164	60.1378	0.000706	65.9	0.007489	72.7	0
ENSP00000228841	MYL2	NoCDRP	noHomolog	dNdS:VIIII_noHomolog	-0.17707	36.9277	0.016813	52.5	0.010816	63.4	6.62651
ENSP00000228843	RAD51AP1	NonDomCDRP	0.6692	dNdS:V_(0.5,1]	0.207648	64.9071	0.022353	51.1	0.011687	61.1	82.6705
ENSP00000228850	AKAP3	DomCDRP	0.6494	dNdS:V_(0.5,1]	0.660206	85.9293	0.026333	50.3	0.006992	74.3	36.5768
ENSP00000228865	CREBL2	NonDomCDRP	noVariation	dNdS:VII_0_0	0.113635	58.2682	0.623024	26.8	0.277746	4	55.8333
ENSP00000228887	GPRC5D	NoCDRP	0.224	dNdS:III_(0.15,0.3]	-0.21443	34.6588	2.97e-05	75.2	0.001277	97.9	2.02899
ENSP00000228918	LTBR	NonDomCDRP	0.4439	dNdS:IV_(0.3,0.5]	-0.10189	42.0154	0.428683	32	0.039726	34.4	37.931
ENSP00000228922	OGFOD2	NoCDRP	0.0881	dNdS:II_(0,0.15]	0.494829	80.2859	3.81e-07	84.1	0.003491	88.7	4
ENSP00000228928	OAS3	NonDomCDRP	0.29	dNdS:III_(0.15,0.3]	1.26466	95.5432	1.82e-23	99.2			5.15179
ENSP00000228936	ART4	NoCDRP	1.3429	dNdS:VI_>1	0.65703	85.8193	0.001452	63.2	0.005904	78.5	0
ENSP00000228938	MGP	NoCDRP	200	dNdS:VI_>1	0.617455	84.6848	0.006728	56.8	0.006589	75.9	0
ENSP00000228945	ARHGDIB	NonDomCDRP	noVariation	dNdS:VII_0_0	-0.41062	23.9162	0.00028	68.9	0.010724	63.6	21.8905
ENSP00000229002	RERGL	NoCDRP	0.7209	dNdS:V_(0.5,1]	1.09128	93.8647	5.32e-09	89.5			0
ENSP00000229030		NoCDRP	0.0135	dNdS:II_(0,0.15]							4.30293
ENSP00000229134	IL26	NoCDRP	noVariation	dNdS:VII_0_0	0.094952	56.7691	0.052762	46.7	0.007621	72.2	0
ENSP00000229135	IFNG	NoCDRP	0.1893	dNdS:III_(0.15,0.3]	-0.08145	43.4624	0.020447	51.5	0.015307	54.7	6.62651
ENSP00000229179	NUP107	NonDomCDRP	0.2338	dNdS:III_(0.15,0.3]	-1.02368	7.54761	1.2e-06	82.3	0.019931	48.7	11.2432
ENSP00000229195	CNOT2	NonDomCDRP	0.2876	dNdS:III_(0.15,0.3]	-0.47719	21.1148	0.999869	4	0.368319	1.4	59.8148
ENSP00000229214	KRR1	NonDomCDRP	0.0743	dNdS:II_(0,0.15]	-0.4424	22.6081	0.019351	51.9	0.054101	28.3	39.1076
ENSP00000229238	MRPL51	NoCDRP	200	dNdS:VI_>1	0.116505	58.4882	0.066747	45.4	0.044307	32.3	0
ENSP00000229239	GAPDH	NoCDRP	noVariation	dNdS:VII_0_0	-0.53435	18.8111	0.18046	39.3	0.030837	39.3	1.19403
ENSP00000229243	ACRBP	D_nonD_CDRP	0.2876	dNdS:III_(0.15,0.3]	0.003305	49.7598	1.88e-07	85.2	0.008462	69.4	33.3333
ENSP00000229264	GNB3	NoCDRP	0.4164	dNdS:IV_(0.3,0.5]	-0.43394	23.0248	6.5e-09	89.4	0.006604	75.8	0.882353
ENSP00000229266	CHPT1	NoCDRP	0.8904	dNdS:V_(0.5,1]	-0.03532	46.9237	0.00357	59.6	0.012565	59.5	0
ENSP00000229268	USP5	NoCDRP	0.1149	dNdS:II_(0,0.15]	-1.45811	3.58859	0.99631	7.8	0.074882	22.9	16.5501
ENSP00000229281	C12orf57	NoCDRP	noVariation	dNdS:VII_0_0	0.028381	51.6698	0.060336	46	0.015952	53.7	10.3175
ENSP00000229304	APOBEC1	NoCDRP	1.1905	dNdS:VI_>1	0.696313	86.8148	0.000145	70.8			5.08475
ENSP00000229307	NANOG	NonDomCDRP	0.819	dNdS:V_(0.5,1]	0.182269	63.3617	0.911619	17.2	0.306913	2.7	32.7869
ENSP00000229314	GOLT1B	NoCDRP	noVariation	dNdS:VII_0_0	0.138058	60.0451	0.798384	21.7	0.194635	11	0
ENSP00000229329	CMAS	NonDomCDRP	0.125	dNdS:II_(0,0.15]	-0.14419	39.1098	0.472364	30.8	0.094761	19.6	13.8249
ENSP00000229330	HCFC2	NonDomCDRP	0.6383	dNdS:V_(0.5,1]	-0.47049	21.4215	0.994468	8.6	0.052572	28.9	21.4646
ENSP00000229332	CLEC4A	NoCDRP	0.5098	dNdS:V_(0.5,1]	0.400816	75.8812	7.44e-07	83.1			2.53165
ENSP00000229335	AICDA	NoCDRP	0.1139	dNdS:II_(0,0.15]	-0.16015	38.0274	0.001256	63.8	0.010431	64.3	0
ENSP00000229340	RAB35	NoCDRP	noVariation	dNdS:VII_0_0	0.018008	50.9	0.979782	11.8	0.205277	9.9	2.48756
ENSP00000229379	COX6A1	NoCDRP	0.6226	dNdS:V_(0.5,1]	-0.18457	36.4762	0.060958	45.9	0.017505	51.6	27.5229
ENSP00000229390	SRSF9	NoCDRP	noVariation	dNdS:VII_0_0	-0.05607	45.3898	0.819639	21	0.204926	10	25.3394
ENSP00000229395	FGFR1OP2	NonDomCDRP	noVariation	dNdS:VII_0_0	-0.37215	25.7684	0.429728	32	0.009598	66.3	34.3874
ENSP00000229402	KLRB1	NoCDRP	0.6311	dNdS:V_(0.5,1]	0.423325	77.0331	4.43e-06	79.8	0.004568	83.7	4.88889
ENSP00000229416	GCLC	NoCDRP	0.3043	dNdS:IV_(0.3,0.5]	-0.41702	23.621	0.815078	21.1	0.048322	30.6	12.5589
ENSP00000229447	IYD	NoCDRP	1.0795	dNdS:VI_>1	0.464667	79.0704	0.088309	43.9	0.047406	31	24.2321
ENSP00000229554	RSPH4A	D_nonD_CDRP	0.4545	dNdS:IV_(0.3,0.5]	-0.22642	33.9526	1.84e-07	85.3	0.009325	66.9	51.257
ENSP00000229583	ADTRP	NoCDRP	0.4978	dNdS:IV_(0.3,0.5]	-0.12168	40.632	0.000703	66			0.403226
ENSP00000229595	ASF1A	NoCDRP	noVariation	dNdS:VII_0_0	-0.11242	41.2919	0.138785	41.2	0.030208	39.7	16.1765
ENSP00000229633	HINT3	NoCDRP	0.3378	dNdS:IV_(0.3,0.5]	0.115548	58.4071	0.096713	43.4	0.000701	99.5	6.59341
ENSP00000229708	ULBP1	NoCDRP	1.2373	dNdS:VI_>1	0.511599	80.9342	0.000173	70.3	0.002801	91.8	3.68852
ENSP00000229725	NEU1	NoCDRP	noHomolog	dNdS:VIIII_noHomolog	-0.41143	23.8873	1.93e-05	76.3	0.012983	58.7	6.98795
ENSP00000229729	SLC44A4	NoCDRP	0.2955	dNdS:III_(0.15,0.3]	0.056934	53.8635	8.28e-08	86.4	0.003207	90	2.11268
ENSP00000229758	FBXO5	NoCDRP	200	dNdS:VI_>1	0.321151	71.847	0.982078	11.4	0.087114	20.7	12.9754
ENSP00000229769	FANCE	NonDomCDRP	0.3732	dNdS:IV_(0.3,0.5]	0.593326	83.9324	0.003139	60.1	0.018193	50.7	26.4925
ENSP00000229771	TULP1	NonDomCDRP	0.7662	dNdS:V_(0.5,1]	0.145861	60.6992	0.807904	21.3	0.069296	24.1	60.8856
ENSP00000229795	MAPK14	NoCDRP	noVariation	dNdS:VII_0_0	0.317325	71.5807	0.997467	7.3	0.252479	5.7	3.33333
ENSP00000229810	RHAG	NoCDRP	1.4561	dNdS:VI_>1	-0.05591	45.413	0.340299	34.5	0.016905	52.4	0
ENSP00000229812	STK38	NoCDRP	200	dNdS:VI_>1	-0.16383	37.7901	0.853295	19.8	0.042547	33	10.5376
ENSP00000229829	HLA-DOA	NoCDRP	0.1398	dNdS:II_(0,0.15]	0.373672	74.6252	1.88e-05	76.4	0.004677	83.3	0
ENSP00000229903	SAYSD1	NoCDRP	0.4173	dNdS:IV_(0.3,0.5]	-0.03069	47.242	0.000748	65.7	0.001928	95.5	21.8579
ENSP00000229922	CAP2	D_nonD_CDRP	1.9091	dNdS:VI_>1	-0.59054	17.04	0.410487	32.5	0.052426	29	24.9476
ENSP00000229955	GPR63	NoCDRP	0.1134	dNdS:II_(0,0.15]	-0.25945	31.9153	0.646359	26.1	0.022407	46.1	0
ENSP00000229971	FBXL4	NoCDRP	0.4221	dNdS:IV_(0.3,0.5]	-0.35029	26.7755	0.007909	56	0.010621	63.9	2.25443
ENSP00000230036	GPLD1	NoCDRP	0.4009	dNdS:IV_(0.3,0.5]	0.325436	72.0553	5.64e-09	89.5	0.006924	74.6	1.07143
ENSP00000230048	ACOT13	NoCDRP	200	dNdS:VI_>1	0.26848	68.6057	3.43e-05	74.9	0.005485	80.2	1.42857
ENSP00000230050	RPS12	NoCDRP	noHomolog	dNdS:VIIII_noHomolog	-0.05798	45.2683	0.827435	20.7	0.20465	10	0
ENSP00000230053	B3GAT2	NonDomCDRP	noVariation	dNdS:VII_0_0	-0.19575	35.7875	7.04e-07	83.1	0.00392	86.7	18.5759
ENSP00000230085	SNX3	NoCDRP	noVariation	dNdS:VII_0_0	-0.21746	34.4389	0.466343	30.9	0.027304	41.7	4.93827
ENSP00000230122	ZBTB24	NonDomCDRP	0.1607	dNdS:III_(0.15,0.3]	-0.8934	9.70076	0.000201	69.8	0.02635	42.5	41.4634
ENSP00000230124	FIG4	NonDomCDRP	0.1695	dNdS:III_(0.15,0.3]	-1.13065	6.25108	6.59e-27	99.5	0.005767	79	14.2227
ENSP00000230221	OR14J1	NoCDRP	noHomolog	dNdS:VIIII_noHomolog	0.123201	58.9975	8.02e-08	86.4	0.003522	88.6	0
ENSP00000230236	HSD17B8	NoCDRP	noHomolog	dNdS:VIIII_noHomolog	0.142841	60.3982	0.744498	23.3	0.062625	25.6	7.27969
ENSP00000230256	UNC93A	NoCDRP	0.4019	dNdS:IV_(0.3,0.5]	0.888022	90.907	1.38e-06	82.1			1.96937
ENSP00000230301	C6orf118	NonDomCDRP	0.5468	dNdS:V_(0.5,1]	0.947093	91.9662	1.46e-17	98	0.001288	97.9	17.2708
ENSP00000230340	BYSL	NonDomCDRP	noVariation	dNdS:VII_0_0	0.56986	83.0526	0.067321	45.3	0.031942	38.5	36.1556
ENSP00000230354	TBP	D_nonD_CDRP	noVariation	dNdS:VII_0_0	-0.24268	32.8761	0.490805	30.2	0.071903	23.5	47.7876
ENSP00000230361	GUCA1B	NoCDRP	noVariation	dNdS:VII_0_0	-0.07666	43.9139	0.001995	61.9	0.002737	92	0
ENSP00000230381	PRPH2	NoCDRP	0.1003	dNdS:II_(0,0.15]	0.512555	80.9921	0.38806	33.1	0.02401	44.6	6.6474
ENSP00000230449	EXOC2	NoCDRP	0.0469	dNdS:II_(0,0.15]	-1.44869	3.68119	0.000115	71.4	0.01272	59.2	5.19481
ENSP00000230461	TMEM30A	NoCDRP	noVariation	dNdS:VII_0_0	-0.52876	19.0774	0.040683	48.2	0.019498	49.3	7.75623
ENSP00000230538	LAMA4	DomCDRP	0.3153	dNdS:IV_(0.3,0.5]	-0.92918	9.04671	9.75e-09	88.9	0.012644	59.4	13.3297
ENSP00000230568	LY86	NoCDRP	0.5606	dNdS:V_(0.5,1]	0.605316	84.2913	9.98e-06	78.1	0.000911	99	0
ENSP00000230582	PRSS16	NoCDRP	0.6912	dNdS:V_(0.5,1]	-0.34853	26.8623	2.24e-06	81.1	0.011718	61	2.52918
ENSP00000230640	SKIV2L2	NonDomCDRP	0.1509	dNdS:III_(0.15,0.3]	-1.09408	6.64467	0.725401	23.9	0.025795	43	8.82917
ENSP00000230658	ISL1	NonDomCDRP	noVariation	dNdS:VII_0_0	-0.23327	33.5012	0.606136	27.3	0.054464	28.2	36.3897
ENSP00000230732	POU4F3	NonDomCDRP	noVariation	dNdS:VII_0_0	-0.38796	25.0507	0.721115	24	0.051035	29.5	41.4201
ENSP00000230771	HARS2	NoCDRP	noVariation	dNdS:VII_0_0	-0.43106	23.129	8.13e-05	72.5	0.014029	56.8	0.988142
ENSP00000230792	NUDT12	NoCDRP	0.1036	dNdS:II_(0,0.15]	-0.14308	39.1735	3.28e-11	93.6	0.005106	81.7	0.21645
ENSP00000230859	PAPD7	NonDomCDRP	noVariation	dNdS:VII_0_0	-0.85412	10.4937	0.998369	6.6	0.267362	4.6	50.7576
ENSP00000230990	HBEGF	NoCDRP	0.2746	dNdS:III_(0.15,0.3]	0.269437	68.6635	0.830814	20.6	0.222391	8.3	22.1154
ENSP00000231009	GZMK	NoCDRP	0.766	dNdS:V_(0.5,1]	0.282679	69.4797	0.000569	66.6	0.001979	95.3	1.51515
ENSP00000231021	CDH9	NoCDRP	0.1279	dNdS:II_(0,0.15]	-1.02096	7.61128	0.992484	9.3	0.191712	11.2	18.7579
ENSP00000231061	SPARC	NoCDRP	noVariation	dNdS:VII_0_0	0.206691	64.8087	0.886494	18.4	0.317198	2.4	12.5413
ENSP00000231121	HAND1	NonDomCDRP	0.0694	dNdS:II_(0,0.15]	0.022792	51.2705	0.069599	45.1	0.047309	31	60.9302
ENSP00000231130		NoCDRP	noHomolog	dNdS:VIIII_noHomolog							6.15578
ENSP00000231134	PCDHB5	NoCDRP	0.2348	dNdS:III_(0.15,0.3]	-0.0047	49.0826	9.45e-07	82.6	0.00539	80.5	9.93711
ENSP00000231136	PCDHB6	NoCDRP	noHomolog	dNdS:VIIII_noHomolog	1.63987	97.6906	0.001727	62.5	0.010348	64.5	7.30479
ENSP00000231137	PCDHB7	NoCDRP	noHomolog	dNdS:VIIII_noHomolog	1.21039	95.1265	1.3e-15	97.2			3.5309
ENSP00000231173	PCDHB15	NoCDRP	0.3433	dNdS:IV_(0.3,0.5]	1.49441	96.9555	0.006801	56.7	0.016428	53.1	10.4193
ENSP00000231188	GRM6	NoCDRP	0.0944	dNdS:II_(0,0.15]	1.12287	94.2235	2.42e-09	90.3	0.003208	90	5.13113
ENSP00000231198	THG1L	NoCDRP	0.2273	dNdS:III_(0.15,0.3]	0.0876	56.2887	3.48e-05	74.8	0.01556	54.4	2.01342
ENSP00000231228	IL12B	NoCDRP	0.1561	dNdS:III_(0.15,0.3]	0.412145	76.4543	0.000223	69.4	0.013157	58.4	2.43902
ENSP00000231368	LNPEP	NoCDRP	0.274	dNdS:III_(0.15,0.3]	-0.93827	8.89043	0.998308	6.7	0.112354	16.8	5.17073
ENSP00000231420	AGXT2	NoCDRP	0.375	dNdS:IV_(0.3,0.5]	0.386109	75.2156	4.67e-15	96.9			0.389105
ENSP00000231449	IL4	NoCDRP	0.8904	dNdS:V_(0.5,1]	0.094952	56.7691	0.168021	39.8	0.013563	57.7	0
ENSP00000231454	IL5	NoCDRP	noVariation	dNdS:VII_0_0	0.154977	61.359	0.028374	50	0.012408	59.7	0
ENSP00000231461	ST8SIA4	NoCDRP	noVariation	dNdS:VII_0_0	-0.22768	33.8832	0.675929	25.3	0.061669	25.9	0.278552
ENSP00000231484	PCDH12	NonDomCDRP	0.1471	dNdS:II_(0,0.15]	0.45698	78.6305	1.29e-10	92.8	0.010283	64.7	34.7973
ENSP00000231487	SKP1	NoCDRP	noHomolog	dNdS:VIIII_noHomolog	-0.04489	46.2233	0.224831	37.8	0.018946	49.9	34.3558
ENSP00000231498	NUP155	NoCDRP	0.4286	dNdS:IV_(0.3,0.5]	-2.42434	1.03606	0.990594	9.8	0.035235	36.5	4.88857
ENSP00000231512	C5orf15	NonDomCDRP	0.3514	dNdS:IV_(0.3,0.5]	0.925243	91.6073	0.016	52.8	0.003215	90	55.8491
ENSP00000231524	TRIM23	NoCDRP	0.2243	dNdS:III_(0.15,0.3]	-1.07651	6.84147	0.066967	45.3	0.060319	26.2	2.43902
ENSP00000231572	RARS	NoCDRP	0.0761	dNdS:II_(0,0.15]	0.210669	65.1386	0.000534	66.9	0.014042	56.8	1.51515
ENSP00000231656		D_nonD_CDRP	1.2277	dNdS:VI_>1					0.218609	8.7	78.4906
ENSP00000231668	BNIP1	NoCDRP	noVariation	dNdS:VII_0_0	0.016246	50.7553	0.001437	63.2	0.008032	70.7	6.27306
ENSP00000231706	SLC7A14	NoCDRP	0.1597	dNdS:III_(0.15,0.3]	-0.32476	28.0373	0.332594	34.8	0.033413	37.6	4.15045
ENSP00000231721	SEMA3G	NoCDRP	0.0739	dNdS:II_(0,0.15]	-0.92135	9.1972	6.08e-10	91.6	0.00368	87.8	13.555
ENSP00000231749	ZMYND10	NoCDRP	0.1538	dNdS:III_(0.15,0.3]	0.42443	77.0736	3.6e-07	84.2	0.008197	70.2	3.63636
ENSP00000231751	LTF	NoCDRP	0.5275	dNdS:V_(0.5,1]	1.37513	96.2551	1.76e-13	95.9	0.004263	85.1	0.704225
ENSP00000231790	MLH1	NonDomCDRP	0.5526	dNdS:V_(0.5,1]	-0.22818	33.8485	0.739578	23.5	0.036124	36.1	20.7672
ENSP00000231887	EHHADH	NoCDRP	0.493	dNdS:IV_(0.3,0.5]	1.87985	98.3678	8.5e-11	93	0.00289	91.4	3.87275
ENSP00000232003	HRG	NonDomCDRP	2.9661	dNdS:VI_>1	1.27167	95.5664	1.7e-12	95.1			49.9048
ENSP00000232014	BCL6	NonDomCDRP	0.0743	dNdS:II_(0,0.15]	0.304533	70.7646	0.982525	11.4	0.106713	17.7	33.9943
ENSP00000232217	RBP2	NoCDRP	200	dNdS:VI_>1	0.207499	64.8666	0.433555	31.9	0.015624	54.2	6.71642
ENSP00000232219	RBP1	NonDomCDRP	1	dNdS:V_(0.5,1]	0.117461	58.546	0.000491	67.1	0.004153	85.6	21.3198
ENSP00000232375	PFKFB4	NoCDRP	noVariation	dNdS:VII_0_0	-0.96954	8.38109	0.000321	68.4	0.016712	52.7	3.62473
ENSP00000232424	HES1	NonDomCDRP	noVariation	dNdS:VII_0_0	-0.25115	32.4015	0.644079	26.2	0.084024	21.2	64.6429
ENSP00000232461	GNAT1	NoCDRP	noVariation	dNdS:VII_0_0	-0.41893	23.5458	2.51e-06	80.8	0.004382	84.5	8
ENSP00000232496		NoCDRP	200	dNdS:VI_>1					0.181387	12	9.09091
ENSP00000232501	NPRL2	NoCDRP	0.1413	dNdS:II_(0,0.15]	-0.54377	18.4175	0.345175	34.4	0.030519	39.5	0
ENSP00000232508	CYB561D2	NoCDRP	0.2727	dNdS:III_(0.15,0.3]	0.294815	70.18	0.01471	53.3	0.005035	81.9	0
ENSP00000232603	MORC1	NoCDRP	0.6339	dNdS:V_(0.5,1]	-0.05083	45.7139	0.000241	69.2	0.01558	54.3	12.6016
ENSP00000232607	UMPS	NoCDRP	1.3333	dNdS:VI_>1	0.151451	61.0986	0.000109	71.6	0.011355	61.9	1.45833
ENSP00000232744	ABTB1	NoCDRP	0.6106	dNdS:V_(0.5,1]	0.111217	58.0946	0.001298	63.7			2.09205
ENSP00000232766	KLHL18	NoCDRP	0.1328	dNdS:II_(0,0.15]	-0.84661	10.6384	0.984175	11.1	0.253644	5.6	0.87108
ENSP00000232854	HEMK1	NoCDRP	1.575	dNdS:VI_>1	0.035079	52.2313	8.23e-05	72.5	0.009652	66.1	0.887574
ENSP00000232888	RRP9	NonDomCDRP	0.2613	dNdS:III_(0.15,0.3]	-0.12153	40.6494	0.342043	34.5	0.026423	42.5	21.6842
ENSP00000232892	AADAC	NoCDRP	0.4935	dNdS:IV_(0.3,0.5]	0.385002	75.1693	0.000182	70.1	0.004558	83.8	0
ENSP00000232905	EIF1B	NoCDRP	noVariation	dNdS:VII_0_0	0.082666	55.9067	0.394741	32.9	0.050085	29.9	0
ENSP00000232974		NonDomCDRP	0.2698	dNdS:III_(0.15,0.3]					0.224059	8.2	48.1928
ENSP00000232975	TNNC1	NoCDRP	noVariation	dNdS:VII_0_0	-0.23246	33.5533	0.510486	29.7	0.061869	25.8	21.118
ENSP00000232978	NKTR	NonDomCDRP	0.3542	dNdS:IV_(0.3,0.5]	-0.00646	48.9321	0.991878	9.5	0.052141	29.1	86.2517
ENSP00000233025	SPCS1	NoCDRP	0.6769	dNdS:V_(0.5,1]	0.15961	61.7121	0.118911	42.2	0.024398	44.2	27.2189
ENSP00000233027	NEK4	NonDomCDRP	noHomolog	dNdS:VIIII_noHomolog	-0.38302	25.2648	1.22e-12	95.2	0.004035	86.1	41.736
ENSP00000233055	WDFY1	NoCDRP	0.107	dNdS:II_(0,0.15]	-0.31948	28.3151	1.69e-05	76.7	0.012943	58.7	2.43902
ENSP00000233078	DAZAP1	NonDomCDRP	noVariation	dNdS:VII_0_0	-0.79137	11.7324	0.999571	5	0.366568	1.4	72.4816
ENSP00000233099	HEATR5B	NoCDRP	0.01	dNdS:II_(0,0.15]	-2.74235	0.76981	8.1e-10	91.3	0.011705	61.1	3.7663
ENSP00000233121	MAPRE3	NoCDRP	0.3043	dNdS:IV_(0.3,0.5]	-0.43505	22.9496	0.799864	21.7	0.09557	19.5	30.605
ENSP00000233143	TMSB10	DomCDRP	0.2057	dNdS:III_(0.15,0.3]	0.120181	58.7255	0.124315	41.9	0.006961	74.5	0
ENSP00000233146	MSH2	NoCDRP	noHomolog	dNdS:VIIII_noHomolog	-1.18113	5.79383	0.867726	19.2	0.057729	27.2	0.963597
ENSP00000233156	TFPI	NoCDRP	0.1781	dNdS:III_(0.15,0.3]	0.274219	68.9414	0.025323	50.4	0.031012	39.2	2.30263
ENSP00000233202	SLC11A1	NonDomCDRP	0.2614	dNdS:III_(0.15,0.3]	0.390894	75.424	6.59e-12	94.5	0.004385	84.5	7.63636
ENSP00000233242	APOB	NoCDRP	0.7071	dNdS:V_(0.5,1]	-0.7581	12.4443	5.49e-16	97.4	0.015979	53.7	0.964278
ENSP00000233331	INO80B	D_nonD_CDRP	0.0681	dNdS:II_(0,0.15]	-0.16478	37.7438	0.949554	14.8	0.311108	2.5	89.3258
ENSP00000233336	TTL	NoCDRP	0.0556	dNdS:II_(0,0.15]	-0.52126	19.4131	0.984658	11	0.22684	7.9	2.91777
ENSP00000233379	FAHD2A	NoCDRP	1.4412	dNdS:VI_>1	0.247077	67.2802	0.054072	46.5	0.035932	36.2	0
ENSP00000233468		NoCDRP	noVariation	dNdS:VII_0_0							1.6
ENSP00000233535	SLC30A3	NoCDRP	noVariation	dNdS:VII_0_0	1.03699	93.2222	0.646084	26.2	0.200335	10.4	18.5567
ENSP00000233575	SNX17	NonDomCDRP	0.0694	dNdS:II_(0,0.15]	-0.67212	14.7132	0.68618	25	0.044918	32	11.2766
ENSP00000233596	REEP6	NoCDRP	noHomolog	dNdS:VIIII_noHomolog	0.878309	90.7102	0.000463	67.3	0.00545	80.3	5.97826
ENSP00000233607		D_nonD_CDRP	0.1714	dNdS:III_(0.15,0.3]					0.249189	6	63.6127
ENSP00000233616	MOGS	NonDomCDRP	0.5577	dNdS:V_(0.5,1]	0.135791	59.9004	3.25e-09	90	0.012924	58.8	12.7838
ENSP00000233623	TTC31	NonDomCDRP	0.8827	dNdS:V_(0.5,1]	0.732212	87.6252	2.62e-15	97	0.004136	85.7	46.4355
ENSP00000233630	PCGF1	NoCDRP	noVariation	dNdS:VII_0_0	0.026468	51.5251	0.98706	10.6	0.218042	8.7	0
ENSP00000233638	TLX2	NonDomCDRP	0.0938	dNdS:II_(0,0.15]	-0.04106	46.5359	0.140778	41			59.507
ENSP00000233668	DOK1	NonDomCDRP	0.1776	dNdS:III_(0.15,0.3]	0.003305	49.7598	0.016993	52.5	0.017369	51.8	41.1642
ENSP00000233710	ACADL	NoCDRP	0.1587	dNdS:III_(0.15,0.3]	0.118569	58.6502	3.59e-08	87.4	0.00568	79.4	7.2093
ENSP00000233735	REG1A	NoCDRP	0.4286	dNdS:IV_(0.3,0.5]	-0.26807	31.3596	0.008528	55.6	0.011712	61	3.01205
ENSP00000233809	IGFBP2	NonDomCDRP	noVariation	dNdS:VII_0_0	-0.15456	38.4037	0.844354	20.1	0.250997	5.8	41.2308
ENSP00000233813	IGFBP5	NonDomCDRP	0.0888	dNdS:II_(0,0.15]	0.314456	71.3376	0.859978	19.5	0.247894	6.1	32.3529
ENSP00000233826	KCNJ13	NoCDRP	0.4828	dNdS:IV_(0.3,0.5]	-0.15919	38.0911	0.758052	22.9	0.107629	17.5	2.5
ENSP00000233838	GGCX	NoCDRP	0.4935	dNdS:IV_(0.3,0.5]	-1.54257	3.12554	1.2e-08	88.7	0.009991	65.3	12.1372
ENSP00000233840	NEU2	NoCDRP	0.3891	dNdS:IV_(0.3,0.5]	0.616793	84.6559	3.09e-12	94.8	0.00196	95.4	10.2632
ENSP00000233893	HSPE1	NoCDRP	noHomolog	dNdS:VIIII_noHomolog	0.174617	62.8234	0.787528	22.1	0.211293	9.4	0
ENSP00000233944	PRKAG3	NonDomCDRP	0.3358	dNdS:IV_(0.3,0.5]	-0.11483	41.1588	9.67e-05	72			26.7894
ENSP00000233948		NoCDRP	noHomolog	dNdS:VIIII_noHomolog					0.081003	21.8	11.7808
ENSP00000233954	IL1RL1	NoCDRP	noHomolog	dNdS:VIIII_noHomolog	1.09349	93.882	1.28e-07	85.9	0.005682	79.4	1.07914
ENSP00000233957	IL18R1	NoCDRP	0.7451	dNdS:V_(0.5,1]	-0.63556	15.7782	5.02e-07	83.7	0.008533	69.2	0.739372
ENSP00000233969	SLC9A2	D_nonD_CDRP	0.1818	dNdS:III_(0.15,0.3]	-1.14198	6.12375	0.481161	30.5	0.043415	32.7	22.9064
ENSP00000233997	AZU1	NoCDRP	0.1193	dNdS:II_(0,0.15]	0.504095	80.6158	8.74e-05	72.3	0.006572	76	6.3745
ENSP00000234160	GORASP2	NonDomCDRP	0.1789	dNdS:III_(0.15,0.3]	-0.38892	25.0043	0.891064	18.2	0.0668	24.6	51.3274
ENSP00000234170	CEBPZ	NonDomCDRP	0.8986	dNdS:V_(0.5,1]	-0.50838	19.8646	1.78e-05	76.6	0.018033	50.9	31.9734
ENSP00000234179	PRKD3	NonDomCDRP	noVariation	dNdS:VII_0_0	-0.54523	18.377	0.008076	55.9	0.022951	45.6	10.5618
ENSP00000234195	RMDN2	NoCDRP	0.746	dNdS:V_(0.5,1]	0.44533	78.1154	5.21e-16	97.4			14.3106
ENSP00000234198	DLX2	D_nonD_CDRP	0.1797	dNdS:III_(0.15,0.3]	0.164393	62.1057	0.887611	18.3	0.262857	4.9	62.1951
ENSP00000234256	SLC1A4	NoCDRP	noVariation	dNdS:VII_0_0	-0.22753	33.9006	0.242898	37.3	0.035062	36.6	9.21053
ENSP00000234296	ORC2	NonDomCDRP	0.5571	dNdS:V_(0.5,1]	-0.43952	22.7644	0.97187	12.8	0.072436	23.3	31.3692
ENSP00000234301	COX7A2L	NoCDRP	noVariation	dNdS:VII_0_0	0.06494	54.5465	0.00041	67.7	0.002019	95.1	0
ENSP00000234313	PLEK	NoCDRP	0.2653	dNdS:III_(0.15,0.3]	0.62606	84.9453	0.140274	41.1	0.031561	38.8	2.28571
ENSP00000234347	PRTN3	NoCDRP	0.512	dNdS:V_(0.5,1]	0.762888	88.3718	0.000831	65.4			5.46875
ENSP00000234371		NoCDRP	0.4946	dNdS:IV_(0.3,0.5]							7.28643
ENSP00000234389		NonDomCDRP	0.2267	dNdS:III_(0.15,0.3]							17.9291
ENSP00000234392	VAX2	NonDomCDRP	0.1215	dNdS:II_(0,0.15]	0.821148	89.5468	0.315039	35.3	0.081766	21.6	55.5172
ENSP00000234396	ATP6V1B1	NoCDRP	0.2258	dNdS:III_(0.15,0.3]	-0.43283	23.0711	0.000244	69.2	0.015938	53.7	1.94932
ENSP00000234420		NonDomCDRP	0.2017	dNdS:III_(0.15,0.3]							20.3676
ENSP00000234453	PLEKHA3	NonDomCDRP	noVariation	dNdS:VII_0_0	-0.19767	35.6486	0.022979	50.9	0.012339	59.9	48.3333
ENSP00000234454	SPR	NoCDRP	0.2961	dNdS:III_(0.15,0.3]	-0.09454	42.4727	0.000439	67.4	0.005243	81.1	3.83142
ENSP00000234590	ENO1	NoCDRP	noVariation	dNdS:VII_0_0	-0.47704	21.1495	0.010373	54.8	0.010293	64.6	0.230415
ENSP00000234739	BCL9	D_nonD_CDRP	0.3333	dNdS:IV_(0.3,0.5]	-0.62066	16.1718	0.831846	20.6	0.048264	30.6	99.6494
ENSP00000234798	TPSG1	NoCDRP	noHomolog	dNdS:VIIII_noHomolog	1.15528	94.5592	4.09e-06	79.9	0.001882	95.7	2.49221
ENSP00000234816	ANGPTL1	NoCDRP	0.1579	dNdS:III_(0.15,0.3]	0.191836	63.9231	1.53e-08	88.4	0.008135	70.4	10.5906
ENSP00000234831	TMEM59	NoCDRP	noVariation	dNdS:VII_0_0	-0.08129	43.4971	2.23e-07	85	0.001567	96.9	2.47678
ENSP00000234961	OPRD1	NoCDRP	0.0838	dNdS:II_(0,0.15]	-0.24827	32.5577	0.109062	42.7	0.004849	82.6	2.15054
ENSP00000235090	WDR77	NoCDRP	0.1667	dNdS:III_(0.15,0.3]	-0.07475	44.0644	0.015727	52.9	0.016054	53.5	8.77193
ENSP00000235180	DLGAP3	D_nonD_CDRP	0.0787	dNdS:II_(0,0.15]	-1.17008	5.89223	0.999639	4.8	0.355009	1.6	68.6415
ENSP00000235307	C1orf21	DomCDRP	noVariation	dNdS:VII_0_0	0.099585	57.1627	0.819117	21	0.221556	8.5	81.8182
ENSP00000235329	MFN2	NoCDRP	0.0656	dNdS:II_(0,0.15]	-1.51351	3.27024	0.999816	4.2	0.406775	0.9	3.43461
ENSP00000235332	MIIP	D_nonD_CDRP	0.5485	dNdS:V_(0.5,1]	1.20972	95.1149	1.96e-15	97.1	0.00159	96.8	58.2474
ENSP00000235345	SLC35D1	NoCDRP	noVariation	dNdS:VII_0_0	-0.36737	26.0057	0.001854	62.2	0.010047	65.2	1.69014
ENSP00000235347		NoCDRP	0.3298	dNdS:IV_(0.3,0.5]							0.421941
ENSP00000235349	PRAMEF4	NoCDRP	0.7692	dNdS:V_(0.5,1]	3.21263	99.6122	0.07461	44.8	0.001032	98.7	0
ENSP00000235372	PRDM2	D_nonD_CDRP	0.2222	dNdS:III_(0.15,0.3]	-0.36634	26.0751	0.995041	8.4	0.055042	27.9	63.5623
ENSP00000235382	RGS2	NoCDRP	0.1397	dNdS:II_(0,0.15]	0.658796	85.8772	0.002945	60.4	0.002909	91.3	16.5877
ENSP00000235521	WARS2	NoCDRP	noVariation	dNdS:VII_0_0	0.231114	66.2962	0.601342	27.4	0.038832	34.7	4.44444
ENSP00000235628	NT5C1A	NoCDRP	0.0556	dNdS:II_(0,0.15]	-0.41797	23.5805	8.15e-05	72.5	0.007665	72.1	14.9457
ENSP00000235835	AKR7A2	NoCDRP	0.195	dNdS:III_(0.15,0.3]	0.795916	89.1185	3.56e-06	80.2	0.010711	63.6	10.8635
ENSP00000236040		NoCDRP	0.6275	dNdS:V_(0.5,1]							5.72139
ENSP00000236137	SLC19A2	NoCDRP	noVariation	dNdS:VII_0_0	0.044495	52.9259	0.004286	58.8	0.014957	55.3	1.60966
ENSP00000236147	SELL	NoCDRP	0.1029	dNdS:II_(0,0.15]	0.105325	57.6315	0.001735	62.4			2.5974
ENSP00000236192	VAMP4	NoCDRP	noVariation	dNdS:VII_0_0	0.002045	49.6382	0.919996	16.7	0.272493	4.3	32.6241
ENSP00000236273	SYF2	NoCDRP	0.2551	dNdS:III_(0.15,0.3]	0.136294	59.9525	0.037927	48.6	0.02261	45.9	21.8107
ENSP00000236495	SLC5A9	NoCDRP	0.2729	dNdS:III_(0.15,0.3]	1.53176	97.106	6.42e-13	95.4			5.52408
ENSP00000236671	CTSD	NoCDRP	noHomolog	dNdS:VIIII_noHomolog	-0.33352	27.5684	0.089186	43.8	0.029	40.5	0.485437
ENSP00000236709	A4GNT	NoCDRP	0.136	dNdS:II_(0,0.15]	0.686087	86.5544	0.598409	27.5			2.64706
ENSP00000236826	MMP8	NoCDRP	0.4551	dNdS:IV_(0.3,0.5]	0.922668	91.5842	1.18e-19	98.6			9.63597
ENSP00000236850	APOA1	NoCDRP	noVariation	dNdS:VII_0_0	-0.14323	39.1503	0.048738	47.2	0.082911	21.4	19.4757
ENSP00000236877		NoCDRP	0.1167	dNdS:II_(0,0.15]							6.94897
ENSP00000236918	TNNT2	D_nonD_CDRP	0.2131	dNdS:III_(0.15,0.3]	-0.23422	33.4201	0.012853	53.9	0.017679	51.3	81.8792
ENSP00000236925	CAMSAP2	D_nonD_CDRP	0.4138	dNdS:IV_(0.3,0.5]	-0.86965	10.1927	0.999974	3	0.136664	14.6	58.2942
ENSP00000236959	ATIC	NoCDRP	noHomolog	dNdS:VIIII_noHomolog	0.026922	51.5772	2.49e-13	95.8	0.00712	74	1.52027
ENSP00000236979	TNP1	DomCDRP	200	dNdS:VI_>1	0.129598	59.3795	0.222165	37.9	0.037334	35.5	0
ENSP00000236980	FASTKD2	NoCDRP	0.2581	dNdS:III_(0.15,0.3]	0.160062	61.7642	4.03e-06	80	0.011646	61.2	1.26761
ENSP00000237172	FILIP1	NonDomCDRP	0.3265	dNdS:IV_(0.3,0.5]	-0.63226	15.8361	1.85e-07	85.3	0.017014	52.3	55.6472
ENSP00000237201	SPACA1	NonDomCDRP	0.4467	dNdS:IV_(0.3,0.5]	-0.31117	28.8823	0.382222	33.2	0.042891	32.8	16.3265
ENSP00000237247	SGIP1	NonDomCDRP	0.7439	dNdS:V_(0.5,1]	-0.95519	8.63576	0.999651	4.8	0.095831	19.4	56.6938
ENSP00000237275		NonDomCDRP	0.414	dNdS:IV_(0.3,0.5]							61.2613
ENSP00000237281	FBXO30	NonDomCDRP	0.1383	dNdS:II_(0,0.15]	-0.51536	19.6273	0.98734	10.5	0.181185	12	16.1074
ENSP00000237283	ADAT2	NoCDRP	0.1832	dNdS:III_(0.15,0.3]	-0.15361	38.4963	2.09e-08	88.1	0.007055	74.1	16.7539
ENSP00000237289	TNFAIP3	NonDomCDRP	0.0992	dNdS:II_(0,0.15]	-0.54155	18.5217	0.999667	4.8	0.38127	1.2	20.6329
ENSP00000237316	TCF21	NonDomCDRP	noVariation	dNdS:VII_0_0	0.026468	51.5251	0.80537	21.4	0.243441	6.5	47.486
ENSP00000237449		NoCDRP	noHomolog	dNdS:VIIII_noHomolog							2.405
ENSP00000237455	RNF103	NoCDRP	noHomolog	dNdS:VIIII_noHomolog	-0.43283	23.0711	0.832673	20.5	0.069027	24.1	3.79562
ENSP00000237530	RPN2	NoCDRP	0.0879	dNdS:II_(0,0.15]	0.479017	79.7129	0.031677	49.4	0.015665	54.1	0.158479
ENSP00000237536		D_nonD_CDRP	0.1822	dNdS:III_(0.15,0.3]					0.07634	22.6	44.7321
ENSP00000237596	PKD2	NonDomCDRP	0.1	dNdS:II_(0,0.15]	-0.4646	21.682	0.995278	8.3	0.058708	26.8	32.3347
ENSP00000237612	ABCG2	NoCDRP	0.2222	dNdS:III_(0.15,0.3]	0.314907	71.3839	1.37e-18	98.3			0.916031
ENSP00000237642		NonDomCDRP	1.3607	dNdS:VI_>1							46.9274
ENSP00000237654	CCNI	NoCDRP	0.3733	dNdS:IV_(0.3,0.5]	-0.33176	27.6553	0.789094	22	0.295399	3.2	10.3448
ENSP00000237696	RARRES1	NoCDRP	0.465	dNdS:IV_(0.3,0.5]	0.110915	58.0598	8.41e-07	82.8	0.007871	71.3	17.3469
ENSP00000237837	FGF23	NonDomCDRP	0.6343	dNdS:V_(0.5,1]	-0.15073	38.6641	0.02799	50	0.018433	50.5	31.0757
ENSP00000237853	ELL2	D_nonD_CDRP	0.3953	dNdS:IV_(0.3,0.5]	-0.52669	19.141	0.998289	6.7	0.189033	11.5	50.3125
ENSP00000238018	GDA	NoCDRP	0.1849	dNdS:III_(0.15,0.3]	0.24899	67.4075	0.998845	6.1	0.191855	11.2	3.39703
ENSP00000238044	C2orf40	NoCDRP	0.3093	dNdS:IV_(0.3,0.5]	0.83042	89.7957	0.001679	62.6			3.37838
ENSP00000238112	CPSF3	NoCDRP	0.0519	dNdS:II_(0,0.15]	-0.90201	9.53869	3.46e-05	74.9	0.01156	61.4	3.94737
ENSP00000238146	DDX55	NoCDRP	0.3617	dNdS:IV_(0.3,0.5]	-0.40377	24.1882	6.01e-06	79.2	0.003638	88	8
ENSP00000238156	CCDC92	NonDomCDRP	0.4321	dNdS:IV_(0.3,0.5]	-0.03899	46.6806	0.36885	33.7	0.047811	30.8	62.5378
ENSP00000238341	CNTRL	D_nonD_CDRP	0.5094	dNdS:V_(0.5,1]	-0.99937	7.87174	4.17e-35	99.8			31.7419
ENSP00000238379	HDHD3	NoCDRP	0.051	dNdS:II_(0,0.15]	0.351163	73.4502	0.005551	57.6	0.006389	76.7	0
ENSP00000238497	VPS4B	NonDomCDRP	noVariation	dNdS:VII_0_0	0.116655	58.5055	0.213874	38.3	0.024764	43.8	25.6757
ENSP00000238558		NonDomCDRP	0.0691	dNdS:II_(0,0.15]					0.019135	49.7	22.179
ENSP00000238561	ADCK1	NoCDRP	0.057	dNdS:II_(0,0.15]	-0.12696	40.279	4.23e-09	89.8	0.005082	81.8	0.191205
ENSP00000238609	IFI27L2	NonDomCDRP	3.5385	dNdS:VI_>1	0.026468	51.5251	0.001507	63	0.002427	93.3	27.6923
ENSP00000238616	NEK9	NonDomCDRP	0.2857	dNdS:III_(0.15,0.3]	-0.47402	21.2768	1.19e-06	82.3	0.007331	73.2	24.617
ENSP00000238628	IFT43	NonDomCDRP	0.0557	dNdS:II_(0,0.15]	0.35212	73.5255	4.38e-07	83.9	0.001256	97.9	36.1502
ENSP00000238647	IRF2BPL	D_nonD_CDRP	0.0181	dNdS:II_(0,0.15]	-0.9844	8.14377	0.968935	13.1			61.9347
ENSP00000238651	ACOT2	NoCDRP	noHomolog	dNdS:VIIII_noHomolog	0.838216	89.9809	0.142295	41	0.020592	48	1.44928
ENSP00000238667	FLVCR2	NoCDRP	0.3857	dNdS:IV_(0.3,0.5]	0.003305	49.7598	0.000368	68	0.010658	63.8	9.31559
ENSP00000238682	TGFB3	NoCDRP	noVariation	dNdS:VII_0_0	-0.42739	23.2158	0.922717	16.5	0.110776	17	9.70874
ENSP00000238714	PAPOLG	NonDomCDRP	noVariation	dNdS:VII_0_0	-1.23121	5.29606	0.989888	10	0.050608	29.7	29.8913
ENSP00000238721	TP53I3	NoCDRP	0.3061	dNdS:IV_(0.3,0.5]	0.184182	63.4659	3.76e-07	84.2			6.3253
ENSP00000238738	RHOQ	NoCDRP	noHomolog	dNdS:VIIII_noHomolog	-0.19958	35.527	0.304655	35.6	0.016029	53.6	0
ENSP00000238788	TMEM214	DomCDRP	0.4779	dNdS:IV_(0.3,0.5]	0.002499	49.673	0.001167	64.1	0.020335	48.4	13.4978
ENSP00000238789	ATAD2B	NonDomCDRP	0.3939	dNdS:IV_(0.3,0.5]	-0.76106	12.3748	0.999999	1.8	0.190708	11.3	38.3402
ENSP00000238823	FAM98A	D_nonD_CDRP	0.5098	dNdS:V_(0.5,1]	0.171241	62.6093	0.689415	24.9	0.072486	23.3	47.2973
ENSP00000238831	YIPF4	NoCDRP	noVariation	dNdS:VII_0_0	0.180356	63.2112	0.019789	51.8	0.040669	33.8	6.96721
ENSP00000238855	AFTPH	NonDomCDRP	0.4625	dNdS:IV_(0.3,0.5]	0.090773	56.5029	0.996888	7.6	0.186298	11.7	49.359
ENSP00000238875	LGALSL	NoCDRP	0.4081	dNdS:IV_(0.3,0.5]	0.457973	78.7058	0.670765	25.5	0.083639	21.3	0
ENSP00000238892	CRIPT	NoCDRP	noVariation	dNdS:VII_0_0	-0.02142	47.8382	0.018615	52	0.009771	65.8	16.8317
ENSP00000238936		NoCDRP	0.136	dNdS:II_(0,0.15]							1.54739
ENSP00000238994	PPP1R3C	NoCDRP	0.0336	dNdS:II_(0,0.15]	-0.15537	38.3747	0.036881	48.7	0.023106	45.5	1.57729
ENSP00000239144	HOXB8	NonDomCDRP	noHomolog	dNdS:VIIII_noHomolog	-0.13014	40.0822	0.444768	31.6	0.024494	44.1	35.8025
ENSP00000239151	HOXB5	NonDomCDRP	noVariation	dNdS:VII_0_0	-0.09821	42.1948	0.48144	30.5	0.072255	23.4	53.1599
ENSP00000239165	HOXB7	NoCDRP	0.6885	dNdS:V_(0.5,1]	0.467389	79.2036	0.007596	56.2	0.00999	65.3	23.0415
ENSP00000239223	DUSP1	NoCDRP	noVariation	dNdS:VII_0_0	-0.15169	38.5889	0.0205	51.5	0.017974	51	0
ENSP00000239231	PANK3	NoCDRP	noVariation	dNdS:VII_0_0	0.036841	52.3239	0.000282	68.8	0.015659	54.2	0
ENSP00000239243	MSX2	NonDomCDRP	0.3542	dNdS:IV_(0.3,0.5]	-0.36656	26.0462	0.421492	32.2	0.06546	24.9	59.176
ENSP00000239316	INSL4	NoCDRP	0.3087	dNdS:IV_(0.3,0.5]	0.415822	76.6395	2.06e-05	76.1	0.002617	92.5	14.3885
ENSP00000239347	IFNA7	NoCDRP	0.7596	dNdS:V_(0.5,1]	0.972176	92.354	9.02e-05	72.2	0.001245	98	0
ENSP00000239367	LRP11	NonDomCDRP	0.2111	dNdS:III_(0.15,0.3]	0.155127	61.4053	0.10097	43.1	0.008528	69.2	31.2
ENSP00000239374	CCDC170	NoCDRP	0.5641	dNdS:V_(0.5,1]	2.09464	98.7266	1.02e-19	98.6	0.002667	92.3	25.4545
ENSP00000239440	ARAP3	NonDomCDRP	0.1438	dNdS:II_(0,0.15]	-0.36089	26.2661	0.967505	13.3	0.03415	37.1	29.7927
ENSP00000239444	PCDHB8	NoCDRP	noHomolog	dNdS:VIIII_noHomolog	1.27522	95.5895	4.8e-08	87	0.005162	81.5	4.24469
ENSP00000239446	PCDHB10	NoCDRP	0.2448	dNdS:III_(0.15,0.3]	2.79907	99.3807	1.18e-06	82.3	0.003227	89.9	5.375
ENSP00000239449	PCDHB14	NoCDRP	0.1453	dNdS:II_(0,0.15]	0.459693	78.7868	9.06e-09	89	0.001861	95.8	3.00752
ENSP00000239450	PCDHB12	NoCDRP	noHomolog	dNdS:VIIII_noHomolog	0.56953	83.0295	0.000155	70.6	0.016004	53.6	4.77987
ENSP00000239451	SLC25A2	NoCDRP	noHomolog	dNdS:VIIII_noHomolog	0.609141	84.4533	0.036597	48.7	0.001547	97	0
ENSP00000239461	PRRX1	NonDomCDRP	noVariation	dNdS:VII_0_0	-0.40871	23.9972	0.752904	23.1	0.100296	18.6	48.9796
ENSP00000239462	TNN	NoCDRP	0.3305	dNdS:IV_(0.3,0.5]	1.05202	93.3843	5.19e-15	96.8	0.006346	76.9	29.4072
ENSP00000239587	TTLL2	NonDomCDRP	0.3315	dNdS:IV_(0.3,0.5]	1.5316	97.1002	4.94e-06	79.6	0.005834	78.8	29.8986
ENSP00000239666	PDZD11	NoCDRP	noVariation	dNdS:VII_0_0	0.166157	62.2272	0.813638	21.2	0.223484	8.2	11.4286
ENSP00000239690	NUDCD1	NoCDRP	0.1458	dNdS:II_(0,0.15]	0.02677	51.5599	3.84e-06	80.1	0.010736	63.6	3.60206
ENSP00000239830	CCDC77	NonDomCDRP	2.037	dNdS:VI_>1	-0.01266	48.498	9.4e-15	96.7	0.002945	91.2	17.418
ENSP00000239882	ELF1	D_nonD_CDRP	0.1333	dNdS:II_(0,0.15]	0.507116	80.749	0.54778	28.7	0.101787	18.4	56.0582
ENSP00000239891	ALG5	NoCDRP	0.1973	dNdS:III_(0.15,0.3]	0.085686	56.1382	0.00343	59.8	0.024018	44.5	0
ENSP00000239906	FAM53C	DomCDRP	0.9091	dNdS:V_(0.5,1]	-0.12999	40.1111	0.639249	26.3	0.057857	27.1	61.7347
ENSP00000239926	MYOT	NonDomCDRP	0.8429	dNdS:V_(0.5,1]	-0.17309	37.1766	2.64e-05	75.5	0.012967	58.7	48.7952
ENSP00000239938	EGR1	D_nonD_CDRP	noHomolog	dNdS:VIIII_noHomolog	-0.87008	10.1812	0.674345	25.4	0.095275	19.5	70.9024
ENSP00000240050		NoCDRP	200	dNdS:VI_>1							0
ENSP00000240055	NFYB	NoCDRP	noHomolog	dNdS:VIIII_noHomolog	0.033014	52.0692	0.003274	60	0.010173	64.9	22.7053
ENSP00000240079		D_nonD_CDRP	0.1765	dNdS:III_(0.15,0.3]							39.6907
ENSP00000240093	FZD3	NonDomCDRP	noVariation	dNdS:VII_0_0	-0.93953	8.86149	0.275435	36.3	0.029738	40	18.3183
ENSP00000240100	DUSP4	NoCDRP	0.0182	dNdS:II_(0,0.15]	0.089513	56.4103	0.539069	28.9	0.071456	23.5	6.34518
ENSP00000240123	SORBS3	D_nonD_CDRP	0.2844	dNdS:III_(0.15,0.3]	1.17619	94.8023	2.31e-06	81	0.010544	64.1	70.4918
ENSP00000240189	PRAMEF2	NoCDRP	0.959	dNdS:V_(0.5,1]	5.36822	99.8553	0.000568	66.6			0.21097
ENSP00000240285	RDH10	NoCDRP	noVariation	dNdS:VII_0_0	0.146517	60.7455	0.93432	15.9	0.267457	4.6	1.46628
ENSP00000240306	DLX4	NonDomCDRP	0.2079	dNdS:III_(0.15,0.3]	0.017202	50.8479	0.005197	57.9	0.013246	58.2	41.6667
ENSP00000240316	COIL	NonDomCDRP	0.3909	dNdS:IV_(0.3,0.5]	-0.09232	42.681	0.0156	53	0.010436	64.3	56.0764
ENSP00000240328	TBX2	D_nonD_CDRP	noVariation	dNdS:VII_0_0	-0.10939	41.5118	0.964019	13.6	0.107191	17.6	43.9607
ENSP00000240333	SLC35B1	NoCDRP	noVariation	dNdS:VII_0_0	0.125115	59.1422	0.013286	53.7	0.013894	57.1	0
ENSP00000240361	TEX14	NonDomCDRP	0.5254	dNdS:V_(0.5,1]	0.030401	51.8377	6.67e-23	99.1			50.2338
ENSP00000240364	FAM117A	D_nonD_CDRP	0.7584	dNdS:V_(0.5,1]	-0.59437	16.8837	1.22e-05	77.6	0.016448	53.1	69.7572
ENSP00000240423	NCAPH	D_nonD_CDRP	0.3793	dNdS:IV_(0.3,0.5]	-0.0829	43.3698	0.032164	49.3	0.01653	53	37.247
ENSP00000240488	MND1	NoCDRP	noVariation	dNdS:VII_0_0	0.361387	73.9654	1.28e-05	77.4	0.006308	77.1	8.78049
ENSP00000240499	ZNF141	NoCDRP	200	dNdS:VI_>1	0.493872	80.2396	0.161889	40.1	0.033085	37.8	5.90717
ENSP00000240587	TSHZ3	NonDomCDRP	0.18	dNdS:III_(0.15,0.3]	-0.83485	10.8873	0.425646	32.1	0.054388	28.2	58.8344
ENSP00000240615	TAS2R8	NoCDRP	1.3611	dNdS:VI_>1	0.262083	68.1774	0.012468	54			0
ENSP00000240617	PLBD1	NoCDRP	0.2544	dNdS:III_(0.15,0.3]	0.26032	68.0558	9.67e-13	95.3	0.002302	93.9	1.98915
ENSP00000240618	KLRK1	NoCDRP	0.0822	dNdS:II_(0,0.15]	0.150344	61.0233	9.75e-10	91.1	0.001428	97.4	0
ENSP00000240619	TAS2R10	NoCDRP	1.5537	dNdS:VI_>1	0.421561	76.9173	0.428566	32	0.015471	54.5	0
ENSP00000240651	PYROXD1	NoCDRP	0.1688	dNdS:III_(0.15,0.3]	-0.27063	31.2438	3.51e-07	84.3	0.010078	65.1	4.6
ENSP00000240662	KCNJ8	NonDomCDRP	noVariation	dNdS:VII_0_0	-0.41717	23.6094	0.25677	36.9	0.068659	24.2	12.0283
ENSP00000240687	TAS2R7	NoCDRP	0.7204	dNdS:V_(0.5,1]	0.5895	83.8224	0.023077	50.9			0
ENSP00000240691	TAS2R9	NoCDRP	0.7315	dNdS:V_(0.5,1]	0.580084	83.4809	0.000279	68.9	0.005489	80.2	0
ENSP00000240922	NAA50	NoCDRP	noVariation	dNdS:VII_0_0	-0.06644	44.6374	0.876849	18.8	0.253992	5.6	5.91716
ENSP00000241014	MAPK8IP1	NonDomCDRP	0.0494	dNdS:II_(0,0.15]	-0.7387	12.9421	0.999001	5.9	0.36027	1.6	56.1181
ENSP00000241041	PEX16	NoCDRP	0.3419	dNdS:IV_(0.3,0.5]	0.180506	63.2286	0.001747	62.4	0.019139	49.6	17.6301
ENSP00000241051	DEPDC7	NoCDRP	0.1682	dNdS:III_(0.15,0.3]	0.097973	57.0006	1.25e-05	77.5	0.004917	82.4	3.13112
ENSP00000241052	CAT	NonDomCDRP	0.1722	dNdS:III_(0.15,0.3]	-0.38126	25.3748	1.48e-06	81.9	0.005536	80	15.5598
ENSP00000241125		DomCDRP	0.0501	dNdS:II_(0,0.15]							42.069
ENSP00000241256	GHSR	NoCDRP	noVariation	dNdS:VII_0_0	0.007937	50.1244	0.043345	47.8	0.023817	44.7	0.273224
ENSP00000241261	TNFSF10	NoCDRP	0.3313	dNdS:IV_(0.3,0.5]	0.213238	65.2602	0.405365	32.6	0.047469	30.9	11.032
ENSP00000241274	SLITRK3	NonDomCDRP	0.101	dNdS:II_(0,0.15]	-1.35291	4.28894	0.603043	27.4	0.066938	24.6	22.7226
ENSP00000241305	CPXM2	D_nonD_CDRP	0.1857	dNdS:III_(0.15,0.3]	0.324324	71.9917	1.83e-10	92.5	0.004074	85.9	20.7672
ENSP00000241356		NoCDRP	noHomolog	dNdS:VIIII_noHomolog					0.003495	88.7	0
ENSP00000241416	ACVR2A	NoCDRP	0.1667	dNdS:III_(0.15,0.3]	0.040668	52.6422	0.993932	8.9	0.088293	20.5	1.94932
ENSP00000241436	POLK	NonDomCDRP	0.5072	dNdS:V_(0.5,1]	0.25584	67.8127	6e-07	83.4	0.008718	68.6	14.3678
ENSP00000241453	FLT3	NoCDRP	2.1304	dNdS:VI_>1	-0.04891	45.905	0.609048	27.2	0.046055	31.5	1.81269
ENSP00000241463	RASL11A	NoCDRP	noVariation	dNdS:VII_0_0	0.036841	52.3239	0.00769	56.1	0.004619	83.5	9.91736
ENSP00000241502	FYTTD1	DomCDRP	noVariation	dNdS:VII_0_0	-0.23231	33.588	0.829002	20.7	0.022781	45.8	59.1195
ENSP00000241527		NonDomCDRP	0.8447	dNdS:V_(0.5,1]							19.4226
ENSP00000241600	MRPS2	NoCDRP	0.1873	dNdS:III_(0.15,0.3]	0.286505	69.7228	0.037223	48.6	0.007038	74.2	12.5
ENSP00000241651	MYOG	NoCDRP	0.4506	dNdS:IV_(0.3,0.5]	0.5678	82.9889	0.740012	23.4	0.195771	10.8	32.5893
ENSP00000242057	AHR	NonDomCDRP	0.2344	dNdS:III_(0.15,0.3]	-0.38016	25.4558	0.999872	4	0.244928	6.3	23.3491
ENSP00000242067	BBS9	NonDomCDRP	0.1685	dNdS:III_(0.15,0.3]	-0.23186	33.6112	6.38e-10	91.5	0.011903	60.6	7.66629
ENSP00000242108	EEPD1	NonDomCDRP	0.0703	dNdS:II_(0,0.15]	-0.5848	17.2368	0.002657	60.8	0.054129	28.3	24.4288
ENSP00000242140		D_nonD_CDRP	0.9167	dNdS:V_(0.5,1]					0.005324	80.8	99.1718
ENSP00000242152	NPY	NoCDRP	0.3217	dNdS:IV_(0.3,0.5]	0.153064	61.2143	0.588186	27.8	0.037955	35.1	27.8351
ENSP00000242159	HOXA7	NonDomCDRP	0.4186	dNdS:IV_(0.3,0.5]	0.146667	60.7802	0.003169	60.1	0.006376	76.8	22.6087
ENSP00000242210	NT5C3A	NoCDRP	noHomolog	dNdS:VIIII_noHomolog	-0.47528	21.2074	0.012372	54.1	0.014398	56.1	0
ENSP00000242261	TWIST1	NonDomCDRP	0.0646	dNdS:II_(0,0.15]	-0.14993	38.7509	0.182034	39.2			61.8812
ENSP00000242315		NonDomCDRP	0.1417	dNdS:II_(0,0.15]							34.75
ENSP00000242338	CNTFR	NonDomCDRP	0.0671	dNdS:II_(0,0.15]	-0.61975	16.1834	0.906207	17.5	0.208903	9.6	15.0538
ENSP00000242375	AKR1D1	NoCDRP	noVariation	dNdS:VII_0_0	-0.35236	26.6597	5.69e-08	86.8	0.007254	73.5	0
ENSP00000242462	NEUROG3	NonDomCDRP	0.1704	dNdS:III_(0.15,0.3]	0.006829	50.0203	0.001117	64.3	0.009981	65.4	57.4766
ENSP00000242465	SRGN	NoCDRP	0.3075	dNdS:IV_(0.3,0.5]	0.125921	59.2059	0.140767	41.1	0.030605	39.4	24.6835
ENSP00000242480	EGR2	NonDomCDRP	noVariation	dNdS:VII_0_0	-0.28387	30.4277	0.619543	27	0.089019	20.4	51.8908
ENSP00000242505		NonDomCDRP	1.8378	dNdS:VI_>1							42.9553
ENSP00000242576	UNG	NonDomCDRP	noVariation	dNdS:VII_0_0	0.01257	50.4486	0.046581	47.4	0.019717	49	21.7252
ENSP00000242577	DYNLL1	NoCDRP	noVariation	dNdS:VII_0_0	0.090169	56.4392	0.69658	24.7	0.199964	10.4	0
ENSP00000242592	ACADS	NoCDRP	0.0822	dNdS:II_(0,0.15]	-0.12712	40.2732	0.000163	70.4	0.014134	56.7	1.45631
ENSP00000242607	HVCN1	NonDomCDRP	0.2214	dNdS:III_(0.15,0.3]	0.302319	70.6431	0.750491	23.1	0.284418	3.6	11.7216
ENSP00000242719	RNF11	NonDomCDRP	noVariation	dNdS:VII_0_0	-0.07394	44.1396	0.420327	32.3	0.059442	26.6	41.5584
ENSP00000242728		NonDomCDRP	noVariation	dNdS:VII_0_0							33.195
ENSP00000242729	SSPN	NonDomCDRP	0.0667	dNdS:II_(0,0.15]	0.686898	86.5717	0.753323	23.1	0.214779	9	15.6379
ENSP00000242776	DDX39A	NonDomCDRP	noVariation	dNdS:VII_0_0	-0.38987	24.958	0.843486	20.1	0.06198	25.7	7.49415
ENSP00000242784		NonDomCDRP	noVariation	dNdS:VII_0_0							85.2273
ENSP00000242786		NoCDRP	0.2248	dNdS:III_(0.15,0.3]							4.19162
ENSP00000242804	ZNF442	NoCDRP	0.5059	dNdS:V_(0.5,1]	1.42654	96.5214	1.47e-07	85.7			5.74163
ENSP00000242810	KLHL24	NoCDRP	0.0693	dNdS:II_(0,0.15]	-0.61497	16.3396	0.252414	37	0.053903	28.3	0.333333
ENSP00000242819	CCDC70	NoCDRP	0.4667	dNdS:IV_(0.3,0.5]	0.578171	83.3883	0.053153	46.7	0.005926	78.4	3.43348
ENSP00000242827	EBPL	NoCDRP	0.9057	dNdS:V_(0.5,1]	0.231921	66.3367	0.038853	48.5	0.017579	51.4	0
ENSP00000242839	ATP7B	NonDomCDRP	0.4658	dNdS:IV_(0.3,0.5]	0.346671	73.2187	5.23e-20	98.7	0.004406	84.4	9.48805
ENSP00000242848	ZC3H13	NonDomCDRP	0.125	dNdS:II_(0,0.15]	-1.66978	2.56989	1	0.2	0.297797	3.1	81.5348
ENSP00000242994	NEUROD4	NonDomCDRP	0.0728	dNdS:II_(0,0.15]	0.285548	69.688	0.140553	41.1	0.023588	45	45.6193
ENSP00000243045	ORMDL2	NoCDRP	0.3258	dNdS:IV_(0.3,0.5]	0.239424	66.8114	0.150869	40.6	0.010813	63.4	0
ENSP00000243052	PDE1B	NonDomCDRP	0.2097	dNdS:III_(0.15,0.3]	-0.40201	24.3098	0.946737	15.1	0.068034	24.3	16.9776
ENSP00000243056	HOXC13	NoCDRP	noVariation	dNdS:VII_0_0	-0.06261	44.9557	0.379359	33.3	0.062746	25.6	37.5758
ENSP00000243077	LRP1	NoCDRP	0.1216	dNdS:II_(0,0.15]	-5.96987	0.052092	1	0.1	0.435235	0.6	2.88292
ENSP00000243082	HOXC11	NonDomCDRP	0.0481	dNdS:II_(0,0.15]	0.152257	61.1622	0.078695	44.5	0.007741	71.8	41.7989
ENSP00000243103	HOXC12	NonDomCDRP	0.2439	dNdS:III_(0.15,0.3]	-0.22768	33.8832	1.89e-09	90.6	0.003416	89.1	46.0993
ENSP00000243108	HOXC6	NonDomCDRP	noVariation	dNdS:VII_0_0	0.005872	49.9392	0.90769	17.5	0.286905	3.5	27.6596
ENSP00000243167	FAAH	NoCDRP	0.1579	dNdS:III_(0.15,0.3]	-0.49764	20.316	5.93e-07	83.5	0.012403	59.8	3.62694
ENSP00000243189		DomCDRP	0.543	dNdS:V_(0.5,1]							87.5862
ENSP00000243213	IL13RA2	NoCDRP	1.619	dNdS:VI_>1	-0.19016	36.1579	7.64e-05	72.7	0.011799	60.8	0
ENSP00000243298	RAB9B	NoCDRP	noVariation	dNdS:VII_0_0	0.024554	51.4152	0.618183	27	0.194484	11	0.497512
ENSP00000243314		DomCDRP	0.7661	dNdS:V_(0.5,1]							26.3492
ENSP00000243326	RIF1	NonDomCDRP	0.3445	dNdS:IV_(0.3,0.5]	-0.94768	8.75152	1	0.7	0.191588	11.3	45.6715
ENSP00000243344	TTC21B	NoCDRP	0.1897	dNdS:III_(0.15,0.3]	0.237627	66.6667	3.39e-22	99	0.007478	72.7	2.20365
ENSP00000243346	NMI	NoCDRP	0.7143	dNdS:V_(0.5,1]	0.580084	83.4809	6.23e-09	89.4	0.004333	84.7	14.9837
ENSP00000243347	TNFAIP6	NoCDRP	0.9474	dNdS:V_(0.5,1]	0.530283	81.6693	4.02e-06	80	0.004011	86.3	2.88809
ENSP00000243349	ACVR1C	NoCDRP	0.0928	dNdS:II_(0,0.15]	-0.56899	17.6883	0.044891	47.6	0.00636	76.9	0
ENSP00000243389	SLC36A1	NoCDRP	0.0978	dNdS:II_(0,0.15]	-0.39914	24.4892	0.023472	50.8	0.018853	50	4.41176
ENSP00000243440	BATF3	D_nonD_CDRP	noVariation	dNdS:VII_0_0	0.129598	59.3795	0.030761	49.5	0.082089	21.5	92.126
ENSP00000243457	KCNJ2	NonDomCDRP	noVariation	dNdS:VII_0_0	-0.74076	12.8494	0.820229	21	0.110394	17.1	10.5386
ENSP00000243501	PLA2G12A	NoCDRP	0.5104	dNdS:V_(0.5,1]	0.353884	73.6702	0.001882	62.1	0.001901	95.6	0
ENSP00000243563	SNRPA	NonDomCDRP	0.16	dNdS:III_(0.15,0.3]	-0.75577	12.4674	0.060279	46	0.015382	54.6	45.7447
ENSP00000243578	B9D2	NoCDRP	noHomolog	dNdS:VIIII_noHomolog	-0.00067	49.3894	0.000845	65.4	0.011289	62.1	0
ENSP00000243643	ZNF415	NoCDRP	0.3426	dNdS:IV_(0.3,0.5]	0.481736	79.8113	0.005828	57.4	0.014019	56.9	8.46847
ENSP00000243644	ZNF350	NonDomCDRP	0.3394	dNdS:IV_(0.3,0.5]	1.02485	93.0949	0.000264	69	0.012385	59.8	9.96241
ENSP00000243662	RAB38	NoCDRP	noVariation	dNdS:VII_0_0	0.804229	89.2169	0.004718	58.4	0.013082	58.5	0
ENSP00000243673	GPR83	NoCDRP	0.1909	dNdS:III_(0.15,0.3]	0.262233	68.2005	0.032468	49.3	0.014237	56.4	2.36407
ENSP00000243706	HAUS3	NoCDRP	0.1085	dNdS:II_(0,0.15]	0.279153	69.2713	8.9e-07	82.7	0.004938	82.3	2.48756
ENSP00000243776	CHPF	NonDomCDRP	0.1912	dNdS:III_(0.15,0.3]	-0.42517	23.3316	0.231251	37.6	0.005678	79.4	15.6129
ENSP00000243786	INHA	NoCDRP	0.6471	dNdS:V_(0.5,1]	0.179549	63.1707	0.199711	38.8	0.01753	51.5	20.4918
ENSP00000243878	ENKD1	D_nonD_CDRP	0.0619	dNdS:II_(0,0.15]	0.535065	81.8834	2.15e-05	76	0.004857	82.6	79.4798
ENSP00000243903	ACTR5	NoCDRP	0.184	dNdS:III_(0.15,0.3]	-0.23488	33.3681	1e-12	95.3	0.006436	76.5	14.4975
ENSP00000243911	MC3R	NoCDRP	0.1701	dNdS:III_(0.15,0.3]	-0.21348	34.7109	0.00136	63.5	0.001095	98.5	0
ENSP00000243924	PI3	NoCDRP	noVariation	dNdS:VII_0_0	0.617455	84.6848	0.00564	57.5	0.008492	69.3	8.54701
ENSP00000243938	WFDC3	NoCDRP	0.073	dNdS:II_(0,0.15]	0.416779	76.6742	0.019238	51.9	0.004912	82.4	6.49351
ENSP00000243997	ATP5E	NoCDRP	200	dNdS:VI_>1	0.249649	67.4249	0.006057	57.2	0.005478	80.2	0
ENSP00000244007	PLCG1	NoCDRP	0.0654	dNdS:II_(0,0.15]	-1.79474	2.20524	0.763352	22.8	0.019386	49.4	6.58404
ENSP00000244020	SRSF6	NonDomCDRP	1.2921	dNdS:VI_>1	-0.54281	18.4812	0.992976	9.2	0.174107	12.4	68.0233
ENSP00000244040	RAB22A	NoCDRP	200	dNdS:VI_>1	0.366978	74.2085	0.68513	25	0.040774	33.8	5.15464
ENSP00000244043	PTGIS	NoCDRP	0.1692	dNdS:III_(0.15,0.3]	0.885151	90.8317	2.42e-05	75.7	0.005623	79.6	0.4
ENSP00000244050	SNAI1	NonDomCDRP	0.8966	dNdS:V_(0.5,1]	-0.38716	25.0912	0.367003	33.7	0.048035	30.7	26.8939
ENSP00000244051	MOCS3	NoCDRP	0.1802	dNdS:III_(0.15,0.3]	-0.32411	28.0604	1.14e-05	77.7	0.01461	55.8	1.73913
ENSP00000244061	RNF114	NoCDRP	noVariation	dNdS:VII_0_0	0.110915	58.0598	0.017005	52.5	0.017354	51.8	0.438596
ENSP00000244137	PEPD	NoCDRP	0.1094	dNdS:II_(0,0.15]	0.276283	69.0861	0.014507	53.3	0.012162	60.2	0
ENSP00000244174	IL9R	NoCDRP	0.6257	dNdS:V_(0.5,1]	0.938788	91.8504	1.92e-06	81.4			8.63724
ENSP00000244217	MCEE	NoCDRP	200	dNdS:VI_>1	0.398903	75.7828	0.002119	61.7	0.001065	98.6	1.70455
ENSP00000244221	PAIP2B	NonDomCDRP	noVariation	dNdS:VII_0_0	0.403538	75.9854	0.091753	43.7	0.011451	61.7	90.2439
ENSP00000244230	MPHOSPH10	DomCDRP	0.7119	dNdS:V_(0.5,1]	1.3111	95.8615	0.585922	27.8	0.058846	26.7	54.3319
ENSP00000244241	IL17C	NoCDRP	0.0557	dNdS:II_(0,0.15]	0.15417	61.3185	0.000566	66.6	0.00515	81.5	20.8122
ENSP00000244289	LIPE	D_nonD_CDRP	0.331	dNdS:IV_(0.3,0.5]	0.777707	88.7481	5.73e-09	89.5	0.003476	88.8	38.29
ENSP00000244314	IRGC	NoCDRP	noVariation	dNdS:VII_0_0	-0.08386	43.3003	0.043736	47.7	0.042047	33.2	19.8704
ENSP00000244333	LYPD3	NonDomCDRP	noVariation	dNdS:VII_0_0	0.294965	70.1974	9.93e-09	88.9	0.002032	95	29.4798
ENSP00000244336	CEACAM8	NoCDRP	0.0843	dNdS:II_(0,0.15]	0.15991	61.7526	1.25e-07	85.9	0.007735	71.8	16.0458
ENSP00000244360		NoCDRP	0.1752	dNdS:III_(0.15,0.3]					0.008273	70	29.7619
ENSP00000244426	FBXO9	NoCDRP	0.2239	dNdS:III_(0.15,0.3]	-0.15169	38.5889	0.734879	23.6	0.04846	30.6	17.8971
ENSP00000244458	PACSIN1	NonDomCDRP	0.1923	dNdS:III_(0.15,0.3]	-0.25578	32.1352	0.991339	9.6	0.241626	6.6	44.5946
ENSP00000244496	RRP36	D_nonD_CDRP	0.1522	dNdS:III_(0.15,0.3]	0.273263	68.8603	9.22e-11	93	0.004788	82.8	64.8649
ENSP00000244513	BTN1A1	NonDomCDRP	2.35	dNdS:VI_>1	1.18434	94.9065	1.14e-09	91	0.005245	81.1	11.2167
ENSP00000244519	BTN3A3	NonDomCDRP	0.1236	dNdS:II_(0,0.15]	1.06443	93.5521	7.19e-10	91.4			16.4384
ENSP00000244527	SLC17A1	NoCDRP	1.44	dNdS:VI_>1	0.244357	67.1471	2.59e-10	92.2	0.003893	86.9	0.428266
ENSP00000244534		NonDomCDRP	0.2276	dNdS:III_(0.15,0.3]							83.7104
ENSP00000244537	HIST1H4F	NoCDRP	noVariation	dNdS:VII_0_0	-0.39562	24.6339	0.181985	39.2	0.016971	52.3	20.3883
ENSP00000244565	UNC5CL	NoCDRP	0.0783	dNdS:II_(0,0.15]	0.622534	84.8353	1.67e-07	85.5	0.00638	76.8	10.0386
ENSP00000244571	AARS2	NoCDRP	0.2258	dNdS:III_(0.15,0.3]	0.358321	73.8438	1.65e-07	85.5	0.017575	51.4	9.44162
ENSP00000244573	HIST1H1A	NonDomCDRP	0.4615	dNdS:IV_(0.3,0.5]	0.03236	52.0461	0.003531	59.7	0.013962	57	80.9302
ENSP00000244576	ZNF391	NonDomCDRP	0.5478	dNdS:V_(0.5,1]	0.291138	69.989	9.26e-07	82.6	0.004245	85.2	32.4022
ENSP00000244623	OR2B6	NoCDRP	2.2769	dNdS:VI_>1	-0.14227	39.2603	0.040731	48.2	0.005068	81.8	0
ENSP00000244669	APOBEC2	NoCDRP	0.4426	dNdS:IV_(0.3,0.5]	0.099736	57.1916	0.132007	41.5	0.011012	62.9	12.0536
ENSP00000244711	MEA1	DomCDRP	noVariation	dNdS:VII_0_0	0.194406	64.0852	0.043401	47.8	0.009672	66.1	94.0541
ENSP00000244728	COL21A1	DomCDRP	0.2384	dNdS:III_(0.15,0.3]	-0.09872	42.1775	1.15e-20	98.8			54.232
ENSP00000244745	SOX4	NonDomCDRP	noVariation	dNdS:VII_0_0	-0.15073	38.6641	0.384006	33.2			64.9789
ENSP00000244751	CPNE5	NonDomCDRP	noVariation	dNdS:VII_0_0	-0.26967	31.2902	0.07789	44.6	0.025383	43.3	8.60034
ENSP00000244769	ATXN1	NonDomCDRP	0.1484	dNdS:II_(0,0.15]	-0.16896	37.466	0.398661	32.8	0.047051	31.1	62.3313
ENSP00000244869	EREG	NoCDRP	0.1792	dNdS:III_(0.15,0.3]	-0.1386	39.5207	0.0004	67.7	0.005664	79.5	2.95858
ENSP00000244926	SCGB1D2	NoCDRP	1.5984	dNdS:VI_>1	0.237511	66.6609	0.096114	43.4	0.024208	44.4	0
ENSP00000244930	SCGB2A1	NoCDRP	200	dNdS:VI_>1	0.381028	74.9551	0.056401	46.3	0.009671	66.1	0
ENSP00000245046	EMC3	NoCDRP	noVariation	dNdS:VII_0_0	-0.22959	33.7443	0.801935	21.6	0.113987	16.7	1.91571
ENSP00000245105	SH3TC1	NonDomCDRP	0.1953	dNdS:III_(0.15,0.3]	3.75408	99.7164	1.08e-27	99.5			12.5
ENSP00000245157	BBS2	NoCDRP	0.2019	dNdS:III_(0.15,0.3]	-0.05098	45.7082	1.85e-10	92.5	0.004107	85.8	3.32871
ENSP00000245206	GOT2	NoCDRP	0.0534	dNdS:II_(0,0.15]	0.271499	68.7735	0.896491	17.9	0.071713	23.5	1.62791
ENSP00000245255	PIWIL1	DomCDRP	0.3333	dNdS:IV_(0.3,0.5]	-1.15698	6.01956	2.13e-07	85.1	0.011305	62.1	12.1951
ENSP00000245304	RAP2A	NoCDRP	200	dNdS:VI_>1	-0.14147	39.3124	0.71734	24.1	0.19975	10.4	0
ENSP00000245312	SLC10A2	NoCDRP	0.233	dNdS:III_(0.15,0.3]	0.559638	82.7574	1.61e-13	95.9	0.001564	96.9	2.58621
ENSP00000245323	EFNB2	NonDomCDRP	noVariation	dNdS:VII_0_0	-0.58974	17.0747	0.938927	15.6	0.292534	3.3	24.6246
ENSP00000245414	IRF1	NonDomCDRP	0.1094	dNdS:II_(0,0.15]	-0.44064	22.7238	0.867789	19.2	0.047119	31.1	49.2308
ENSP00000245451	BMP4	NonDomCDRP	200	dNdS:VI_>1	0.073551	55.1948	0.967466	13.3	0.226196	8	23.7745
ENSP00000245457	PTGER2	NoCDRP	0.7561	dNdS:V_(0.5,1]	-0.35891	26.3414	0.105023	42.8	0.009919	65.5	6.70391
ENSP00000245479	SOX9	D_nonD_CDRP	noVariation	dNdS:VII_0_0	-0.91702	9.26666	0.98354	11.2	0.234858	7.2	89.1945
ENSP00000245503	MYH2	DomCDRP	0.1383	dNdS:II_(0,0.15]	-1.70901	2.41361	1.37e-08	88.5	0.012019	60.4	26.4297
ENSP00000245543	ARMC7	NoCDRP	0.1108	dNdS:II_(0,0.15]	0.167263	62.3256	0.014947	53.2	0.007545	72.5	2.52525
ENSP00000245544	NUP85	NoCDRP	0.2192	dNdS:III_(0.15,0.3]	-0.52191	19.3726	0.999783	4.4	0.144493	14	2.43902
ENSP00000245552	NT5C	NoCDRP	0.1496	dNdS:II_(0,0.15]	0.352928	73.5718	0.012649	54	0.005371	80.6	0.497512
ENSP00000245564	MSTO1	NoCDRP	0.2281	dNdS:III_(0.15,0.3]	0.754573	88.2155	0.041804	48.1	0.031168	39.1	7.01754
ENSP00000245615	MBOAT7	NoCDRP	0.0335	dNdS:II_(0,0.15]	-0.36449	26.162	0.04632	47.4	0.020328	48.4	1.90678
ENSP00000245663	ZBTB46	NonDomCDRP	0.1296	dNdS:II_(0,0.15]	-1.02846	7.50709	0.814437	21.1	0.037132	35.6	43.6333
ENSP00000245680	SLC35F5	NoCDRP	0.1667	dNdS:III_(0.15,0.3]	0.046409	53.1227	0.001216	64	0.016479	53	3.82409
ENSP00000245796	PSD4	NonDomCDRP	0.1606	dNdS:III_(0.15,0.3]	-0.11261	41.2629	0.805496	21.4	0.060058	26.3	59.2803
ENSP00000245812	ALKBH7	NoCDRP	noVariation	dNdS:VII_0_0	0.309822	71.0598	2.76e-06	80.7	0.004816	82.7	6.78733
ENSP00000245816	CLPP	NonDomCDRP	0.1122	dNdS:II_(0,0.15]	-0.31308	28.6971	0.587942	27.8	0.070435	23.8	18.7726
ENSP00000245817	TNFSF9	NoCDRP	noHomolog	dNdS:VIIII_noHomolog	0.38581	75.1982	0.096827	43.4	0.050002	30	7.48031
ENSP00000245907	C3	NoCDRP	0.317	dNdS:IV_(0.3,0.5]	-3.09354	0.567228	0.99959	4.9	0.029591	40.1	8.47865
ENSP00000245908	SH2D3A	NonDomCDRP	0.2282	dNdS:III_(0.15,0.3]	1.57934	97.3838	4.11e-06	79.9			31.7708
ENSP00000245919	FOSB	D_nonD_CDRP	noHomolog	dNdS:VIIII_noHomolog	-0.33927	27.2964	0.852916	19.8	0.060793	26.1	79.5858
ENSP00000245923	RTN2	NonDomCDRP	noHomolog	dNdS:VIIII_noHomolog	-0.34375	27.0707	0.63618	26.4	0.059439	26.6	46.789
ENSP00000245932	VASP	D_nonD_CDRP	noHomolog	dNdS:VIIII_noHomolog	-0.08129	43.4971	0.583671	27.9	0.044861	32.1	79.4737
ENSP00000245934	SYMPK	NonDomCDRP	0.0409	dNdS:II_(0,0.15]	-1.71874	2.38467	0.997278	7.4	0.054646	28.1	24.1758
ENSP00000245957		NoCDRP	0.6029	dNdS:V_(0.5,1]							5.09297
ENSP00000245960	CDC25B	D_nonD_CDRP	0.3744	dNdS:IV_(0.3,0.5]	0.1797	63.1823	0.590733	27.7	0.042154	33.2	46.0345
ENSP00000245983	GNRH2	NonDomCDRP	1.1854	dNdS:VI_>1	0.42796	77.2819	0.000229	69.4	0.003126	90.5	69.1667
ENSP00000246006	CD93	NonDomCDRP	0.4657	dNdS:IV_(0.3,0.5]	1.28124	95.6705	7.82e-10	91.3	0.010639	63.9	24.0798
ENSP00000246012	CST8	NoCDRP	0.1015	dNdS:II_(0,0.15]	0.468345	79.2441	0.085629	44.1	0.007632	72.2	0
ENSP00000246024	TMX4	D_nonD_CDRP	noVariation	dNdS:VII_0_0	0.099736	57.1916	0.010662	54.7	0.013067	58.5	38.3954
ENSP00000246041	AP5S1	NoCDRP	noVariation	dNdS:VII_0_0	0.039711	52.5438	0.000277	68.9	0.004277	85	17.5
ENSP00000246043	RRBP1	D_nonD_CDRP	0.2143	dNdS:III_(0.15,0.3]	0.843488	90.0677	0.000136	71	0.013711	57.5	76.4539
ENSP00000246069	DSTN	NoCDRP	noVariation	dNdS:VII_0_0	-0.17994	36.7309	0.759201	22.9	0.204078	10.1	0
ENSP00000246070	LAMP5	NoCDRP	1.5227	dNdS:VI_>1	-0.38237	25.3111	3.84e-08	87.3	0.006864	74.8	2.14286
ENSP00000246071	SNRPB2	NonDomCDRP	0.1	dNdS:II_(0,0.15]	-0.209	34.9829	0.320265	35.1	0.014606	55.8	28.8889
ENSP00000246080		NonDomCDRP	noHomolog	dNdS:VIIII_noHomolog							45.2261
ENSP00000246081	OTOR	NoCDRP	noVariation	dNdS:VII_0_0	0.245971	67.2455	0.014821	53.2	0.006001	78.1	0
ENSP00000246100		D_nonD_CDRP	0.1187	dNdS:II_(0,0.15]							69.4915
ENSP00000246104		NonDomCDRP	noHomolog	dNdS:VIIII_noHomolog							42.0195
ENSP00000246105	DEFB129	NonDomCDRP	noVariation	dNdS:VII_0_0	0.580894	83.5157	0.00871	55.5	0.000551	99.7	33.3333
ENSP00000246112	TLE6	NonDomCDRP	0.3681	dNdS:IV_(0.3,0.5]	0.061566	54.2745	0.001011	64.7	0.016122	53.5	31.4685
ENSP00000246115	S1PR4	NoCDRP	noVariation	dNdS:VII_0_0	0.584867	83.6777	0.520047	29.5	0.074702	23	0.78125
ENSP00000246117	NCLN	NoCDRP	0.0243	dNdS:II_(0,0.15]	-0.72369	13.3125	0.509474	29.7	0.059117	26.7	2.48668
ENSP00000246151	PITHD1	NoCDRP	0.0629	dNdS:II_(0,0.15]	-0.13397	39.8102	0.102417	43	0.031931	38.5	27.4882
ENSP00000246166	FNTB	NoCDRP	noVariation	dNdS:VII_0_0	-0.42548	23.3142	0.172001	39.7	0.032488	38.2	3.20366
ENSP00000246186	MMP24	NonDomCDRP	noVariation	dNdS:VII_0_0	-0.20406	35.2087	0.028762	49.9	0.036459	36	16.8992
ENSP00000246190	NECAB3	NonDomCDRP	0.314	dNdS:IV_(0.3,0.5]	0.462754	78.9663	0.797631	21.8	0.043455	32.6	26.2626
ENSP00000246194	RALY	NonDomCDRP	0.2109	dNdS:III_(0.15,0.3]	0.428107	77.3051	0.554574	28.5	0.032563	38.1	41.5033
ENSP00000246229	PLAGL2	NoCDRP	0.1587	dNdS:III_(0.15,0.3]	-0.84198	10.7484	0.869796	19.1	0.27139	4.4	19.9597
ENSP00000246337	UROD	NoCDRP	0.1609	dNdS:III_(0.15,0.3]	-0.09439	42.5016	0.000142	70.8	0.007632	72.1	5.17711
ENSP00000246421	SLC35E2	NonDomCDRP	noHomolog	dNdS:VIIII_noHomolog	1.15882	94.6229	0.374306	33.5			20.3008
ENSP00000246505	PCID2	NoCDRP	noVariation	dNdS:VII_0_0	-0.20597	35.145	6.37e-09	89.4	0.003495	88.7	0.441501
ENSP00000246515	SLURP1	NoCDRP	noVariation	dNdS:VII_0_0	0.434507	77.5887	0.328314	34.9	0.021973	46.5	0
ENSP00000246529	LRFN3	NonDomCDRP	0.0859	dNdS:II_(0,0.15]	-0.77893	12.0449	0.860303	19.5	0.258942	5.2	22.1338
ENSP00000246532	IGFLR1	NoCDRP	0.5875	dNdS:V_(0.5,1]	0.540804	82.1034	0.000165	70.4	0.011477	61.6	14.0845
ENSP00000246535	PDCD2L	NoCDRP	0.4566	dNdS:IV_(0.3,0.5]	-0.14786	38.9014	4.99e-05	73.9	0.011558	61.4	12.8492
ENSP00000246548	UBA2	DomCDRP	noVariation	dNdS:VII_0_0	-0.52493	19.2221	0.999673	4.7	0.341492	1.9	29.375
ENSP00000246549	FFAR2	NonDomCDRP	0.2899	dNdS:III_(0.15,0.3]	0.119525	58.7081	0.000644	66.2	0.005114	81.6	9.09091
ENSP00000246551	HCST	NoCDRP	0.1627	dNdS:III_(0.15,0.3]	0.236555	66.603	0.011934	54.2	0.005905	78.5	3.22581
ENSP00000246553		NoCDRP	0.0909	dNdS:II_(0,0.15]							0.333333
ENSP00000246635	KRT13	NonDomCDRP	0.0259	dNdS:II_(0,0.15]	0.459226	78.7752	0.001668	62.6	0.008845	68.3	19.6507
ENSP00000246646	KRT38	NoCDRP	0.3046	dNdS:IV_(0.3,0.5]	0.448048	78.2775	2.17e-05	76	0.001368	97.6	1.97368
ENSP00000246657	CCR7	NoCDRP	0.0564	dNdS:II_(0,0.15]	-0.49683	20.3334	0.647009	26.1	0.091907	20	0
ENSP00000246662	KRT9	D_nonD_CDRP	0.1649	dNdS:III_(0.15,0.3]	0.1797	63.1823	0.001319	63.7	0.009349	66.9	42.3756
ENSP00000246672	NR1D1	NonDomCDRP	noVariation	dNdS:VII_0_0	-0.90936	9.41714	0.946085	15.2	0.085087	21	50.1629
ENSP00000246792	RRAS	NonDomCDRP	0.1111	dNdS:II_(0,0.15]	-0.03819	46.7095	0.287257	36	0.035722	36.3	24.3119
ENSP00000246794	PRRG2	NonDomCDRP	0.6926	dNdS:V_(0.5,1]	0.526459	81.4783	5.97e-05	73.4			31.6832
ENSP00000246801	TSKS	DomCDRP	0.7677	dNdS:V_(0.5,1]	0.055977	53.7767	0.980814	11.6	0.101755	18.4	53.3784
ENSP00000246802		D_nonD_CDRP	0.1705	dNdS:III_(0.15,0.3]							58.9958
ENSP00000246841	FLRT1	NoCDRP	0.0157	dNdS:II_(0,0.15]	0.02516	51.4325	0.54632	28.7	0.095382	19.5	5.19288
ENSP00000246891	CSN1S1	NonDomCDRP	2	dNdS:VI_>1	0.77694	88.7133	8.3e-06	78.5			47.5676
ENSP00000246912	MLX	NonDomCDRP	noVariation	dNdS:VII_0_0	-0.47065	21.3926	0.469292	30.9	0.045659	31.7	49.3289
ENSP00000246914	WNK4	NonDomCDRP	0.2541	dNdS:III_(0.15,0.3]	0.609922	84.4707	1.83e-13	95.9	0.005586	79.8	61.6251
ENSP00000246957	TRAP1	NoCDRP	0.1934	dNdS:III_(0.15,0.3]	1.02166	93.0601	1.62e-17	98	0.00357	88.3	6.39205
ENSP00000247001	SUGP1	NonDomCDRP	0.0407	dNdS:II_(0,0.15]	-0.77239	12.1317	0.999636	4.9	0.354199	1.7	61.7054
ENSP00000247003	DDX49	NonDomCDRP	noVariation	dNdS:VII_0_0	0.099887	57.2032	3.24e-10	92.1			10.559
ENSP00000247005		NoCDRP	noHomolog	dNdS:VIIII_noHomolog							23.1183
ENSP00000247020	SDF2	NoCDRP	0.0868	dNdS:II_(0,0.15]	-0.1461	38.9825	0.68281	25.1	0.042367	33.1	17.0616
ENSP00000247026	NSRP1	NonDomCDRP	0.9318	dNdS:V_(0.5,1]	0.077378	55.4842	0.104802	42.8	0.022843	45.7	80.1075
ENSP00000247178	ATG14	NoCDRP	0.5	dNdS:IV_(0.3,0.5]	-0.56803	17.7114	0.326846	35	0.027435	41.6	26.626
ENSP00000247182	SIX1	NonDomCDRP	noVariation	dNdS:VII_0_0	-0.31772	28.4077	0.926377	16.3	0.294963	3.2	47.8873
ENSP00000247191	DLGAP5	NonDomCDRP	0.8519	dNdS:V_(0.5,1]	0.497852	80.3727	1.74e-05	76.6	0.013365	58.1	55.0827
ENSP00000247194	L3HYPDH	NoCDRP	0.2941	dNdS:III_(0.15,0.3]	0.263996	68.3278	1.52e-07	85.6	0.003191	90.2	4.23729
ENSP00000247219	TBPL2	NonDomCDRP	200	dNdS:VI_>1	0.1655	62.2041	4.93e-08	87			41.6
ENSP00000247225	SGPP1	NonDomCDRP	0.3421	dNdS:IV_(0.3,0.5]	-0.20326	35.2608	0.500346	29.9	0.053198	28.7	23.8095
ENSP00000247226	PLEKHG3	NonDomCDRP	0.2	dNdS:III_(0.15,0.3]	1.56693	97.3028	1.16e-08	88.8	0.011773	60.9	59.475
ENSP00000247270	EVI2A	NoCDRP	0.2813	dNdS:III_(0.15,0.3]	0.282679	69.4797	8.69e-06	78.4	0.002992	91	27.4131
ENSP00000247271	OMG	NonDomCDRP	0.35	dNdS:IV_(0.3,0.5]	-0.18825	36.2563	0.863213	19.4	0.288489	3.4	16.5909
ENSP00000247306	CTAG2	D_nonD_CDRP	1.0836	dNdS:VI_>1	1.13726	94.4087	0.005954	57.3	0.010016	65.3	89.5238
ENSP00000247470	PYCARD	NoCDRP	0.2079	dNdS:III_(0.15,0.3]	-0.07858	43.7634	0.016504	52.7	0.001809	95.9	9.74359
ENSP00000247655	COX7C	NoCDRP	noVariation	dNdS:VII_0_0	-0.00737	48.8569	0.545792	28.7	0.133808	14.8	0
ENSP00000247665	PHPT1	NoCDRP	noVariation	dNdS:VII_0_0	0.113785	58.303	0.00434	58.7	0.009643	66.2	0.8
ENSP00000247668	TRAF2	NoCDRP	0.079	dNdS:II_(0,0.15]	-0.75179	12.5543	0.996481	7.7	0.070667	23.8	0
ENSP00000247706	ABHD8	NonDomCDRP	0.0476	dNdS:II_(0,0.15]	-0.56899	17.6883	0.642341	26.3	0.227186	7.9	23.6902
ENSP00000247815	HELB	NonDomCDRP	0.1579	dNdS:III_(0.15,0.3]	0.72135	87.4747	2.02e-13	95.8	0.002993	91	19.2272
ENSP00000247843	YEATS4	NoCDRP	noVariation	dNdS:VII_0_0	-0.07299	44.2322	0.098739	43.2	0.005772	79	0.440529
ENSP00000247879	TAS2R3	NoCDRP	0.1974	dNdS:III_(0.15,0.3]	0.155127	61.4053	0.000144	70.8			2.21519
ENSP00000247881	TAS2R4	NoCDRP	1.175	dNdS:VI_>1	0.690721	86.6933	0.049738	47	0.00598	78.2	0
ENSP00000247883	TAS2R5	NoCDRP	1.2677	dNdS:VI_>1	0.578171	83.3883	0.000104	71.7	0.011552	61.4	0
ENSP00000247930	ZNF777	NonDomCDRP	0.0394	dNdS:II_(0,0.15]	-0.60812	16.5133	0.997614	7.2	0.274933	4.2	56.5584
ENSP00000247933	IDUA	NoCDRP	0.3795	dNdS:IV_(0.3,0.5]	0.610246	84.4996	2.64e-08	87.8			7.81011
ENSP00000247956	ZNF317	NoCDRP	0.3363	dNdS:IV_(0.3,0.5]	-0.38126	25.3748	0.015707	52.9	0.012681	59.3	15.7983
ENSP00000247977	FBXL12	NoCDRP	noVariation	dNdS:VII_0_0	0.35212	73.5255	0.014518	53.3			0
ENSP00000247986	KIF17	NonDomCDRP	0.1337	dNdS:II_(0,0.15]	1.276	95.6011	3.34e-13	95.7			35.7629
ENSP00000247992		NoCDRP	1.3443	dNdS:VI_>1							0.666667
ENSP00000248071		NonDomCDRP	0.2768	dNdS:III_(0.15,0.3]							65.0704
ENSP00000248072	OR7C2	NoCDRP	1.2958	dNdS:VI_>1	0.322107	71.8933	0.042449	48	0.019379	49.4	0.31348
ENSP00000248073	OR7C1	NoCDRP	0.4901	dNdS:IV_(0.3,0.5]	0.730151	87.5789	0.220027	38	0.019651	49.1	0.3125
ENSP00000248076	F2RL3	NoCDRP	0.2066	dNdS:III_(0.15,0.3]	1.067	93.5984	0.003022	60.3			6.49351
ENSP00000248114	GFER	NonDomCDRP	0.6621	dNdS:V_(0.5,1]	0.466432	79.1457	1.85e-06	81.5	0.003247	89.8	32.1951
ENSP00000248142	WDR24	NonDomCDRP	noVariation	dNdS:VII_0_0	-1.09872	6.59258	0.004702	58.4	0.020833	47.7	15.9783
ENSP00000248150	GNG13	NoCDRP	noVariation	dNdS:VII_0_0	0.373525	74.6021	0.004893	58.2	0.000661	99.5	0
ENSP00000248211	ZNF10	NoCDRP	noHomolog	dNdS:VIIII_noHomolog	-0.62151	16.1486	0.000432	67.5	0.023667	44.9	3.4904
ENSP00000248244	TICAM1	D_nonD_CDRP	0.1909	dNdS:III_(0.15,0.3]	0.962256	92.2267	0.852477	19.8	0.085521	20.9	51.9663
ENSP00000248248	MON1B	NonDomCDRP	0.1078	dNdS:II_(0,0.15]	-1.33245	4.46258	0.22974	37.7	0.038972	34.7	23.2176
ENSP00000248306	METTL25	DomCDRP	0.1085	dNdS:II_(0,0.15]	-0.33801	27.3601	1.65e-07	85.5	0.007102	74	14.5937
ENSP00000248342	EIF3K	NoCDRP	noVariation	dNdS:VII_0_0	0.484307	79.8634	0.002332	61.4	0.004909	82.4	0
ENSP00000248384	OR1E2	NoCDRP	0.5098	dNdS:V_(0.5,1]	0.490046	80.1007	0.020874	51.4	0.02115	47.4	0
ENSP00000248420	CACTIN	NonDomCDRP	0.0425	dNdS:II_(0,0.15]	-0.94784	8.74573	0.999345	5.5	0.334772	2	51.715
ENSP00000248437	TUBA4A	NoCDRP	noVariation	dNdS:VII_0_0	-0.8233	11.0957	0.029638	49.7	0.023148	45.4	5.13393
ENSP00000248444	VIL1	NoCDRP	0.0879	dNdS:II_(0,0.15]	0.027074	51.583	1.21e-05	77.6	0.007754	71.7	7.98065
ENSP00000248553	HSPB1	DomCDRP	noVariation	dNdS:VII_0_0	-0.39658	24.576	6.92e-06	79	0.002995	91	36.0976
ENSP00000248564	GNG11	NoCDRP	noVariation	dNdS:VII_0_0	0.288121	69.7575	0.163792	40	0.026166	42.7	38.3562
ENSP00000248572	GNGT1	NoCDRP	noVariation	dNdS:VII_0_0	0.145561	60.6529	0.276893	36.3	0.011326	62	13.5135
ENSP00000248594	PTPN12	NonDomCDRP	200	dNdS:VI_>1	-0.85588	10.4648	0.99946	5.2	0.133259	14.8	58.2051
ENSP00000248598	FGL2	NoCDRP	0.1101	dNdS:II_(0,0.15]	-0.38237	25.3111	0.094998	43.5	0.011238	62.2	5.69476
ENSP00000248633	PEX1	NonDomCDRP	0.1045	dNdS:II_(0,0.15]	0.138816	60.0741	3.97e-05	74.5	0.020419	48.2	14.5752
ENSP00000248643		NoCDRP	0.5172	dNdS:V_(0.5,1]							0
ENSP00000248668	LRFN1	NonDomCDRP	0.0775	dNdS:II_(0,0.15]	-0.85412	10.4937	0.830756	20.6			23.3463
ENSP00000248706	RASL11B	NoCDRP	0.2105	dNdS:III_(0.15,0.3]	-0.34773	26.8854	0.290785	36	0.043745	32.5	10.4839
ENSP00000248846	TUBGCP6	NonDomCDRP	0.3858	dNdS:IV_(0.3,0.5]	-0.16316	37.7959	5.09e-19	98.4	0.006418	76.6	35.569
ENSP00000248879	DGCR6L	NoCDRP	0.2893	dNdS:III_(0.15,0.3]	0.037798	52.376	0.128574	41.6	0.028892	40.6	16.3636
ENSP00000248901	CYTH4	NoCDRP	0.0196	dNdS:II_(0,0.15]	-0.53898	18.6259	0.572495	28.2	0.032939	37.9	3.04569
ENSP00000248929	SGSM3	NoCDRP	0.1202	dNdS:II_(0,0.15]	-1.38852	4.00533	1.01e-06	82.5	0.014529	56	2.80374
ENSP00000248933	SEZ6L	NonDomCDRP	0.2375	dNdS:III_(0.15,0.3]	0.236356	66.5741	0.928831	16.2	0.048556	30.5	24.6094
ENSP00000248948	VPREB3	NoCDRP	200	dNdS:VI_>1	0.512408	80.9805	0.016149	52.8	0.003358	89.4	4.06504
ENSP00000248958		NoCDRP	0.1645	dNdS:III_(0.15,0.3]							26.2443
ENSP00000248975	YWHAH	NoCDRP	noVariation	dNdS:VII_0_0	-0.17148	37.2634	0.555591	28.5	0.083786	21.2	6.09756
ENSP00000248983	RFPL2	NoCDRP	0.8286	dNdS:V_(0.5,1]	1.70693	97.9395	7.38e-05	72.8	0.000812	99.3	6.87831
ENSP00000249007	RFPL3	NoCDRP	3.2817	dNdS:VI_>1	1.00984	92.8865	0.000158	70.5	0.008339	69.8	4.73186
ENSP00000249014	CDC42EP1	D_nonD_CDRP	0.3141	dNdS:IV_(0.3,0.5]	0.838216	89.9809	1.06e-05	77.9	0.003955	86.5	86.445
ENSP00000249016	MCHR1	NoCDRP	0.1235	dNdS:II_(0,0.15]	-0.47976	21.0164	0.001148	64.2	0.005967	78.2	13.7441
ENSP00000249041		NonDomCDRP	0.0433	dNdS:II_(0,0.15]					0.005884	78.6	13.587
ENSP00000249042	TST	NoCDRP	0.1094	dNdS:II_(0,0.15]	0.97968	92.4871	0.000732	65.8	0.004812	82.7	10.4377
ENSP00000249044	APOL5	NonDomCDRP	0.8512	dNdS:V_(0.5,1]	0.674906	86.2939	1.01e-08	88.9	0.001738	96.2	27.2517
ENSP00000249064	CCDC117	D_nonD_CDRP	1.631	dNdS:VI_>1	-0.10667	41.6913	0.619564	26.9	0.093253	19.8	67.3835
ENSP00000249071	RAC2	NoCDRP	noHomolog	dNdS:VIIII_noHomolog	-0.20245	35.3186	0.873092	18.9	0.250644	5.9	0
ENSP00000249075	LIF	NoCDRP	noVariation	dNdS:VII_0_0	-0.07666	43.9139	0.774442	22.5	0.227485	7.8	0
ENSP00000249079	C22orf23	DomCDRP	0.1937	dNdS:III_(0.15,0.3]	0.400816	75.8812	2.51e-06	80.8	0.003074	90.7	60.8295
ENSP00000249284	TAS2R16	NoCDRP	0.4842	dNdS:IV_(0.3,0.5]	0.336157	72.6399	0.014997	53.2	0.003558	88.4	0
ENSP00000249299		NoCDRP	noVariation	dNdS:VII_0_0							0
ENSP00000249344	STRIP2	NonDomCDRP	0.0463	dNdS:II_(0,0.15]	-1.2001	5.58546	7.35e-10	91.3	0.011965	60.5	15.3477
ENSP00000249356	DNAJB9	NoCDRP	0.44	dNdS:IV_(0.3,0.5]	0.173809	62.7945	0.224583	37.8	0.087673	20.6	22.4215
ENSP00000249363	LRRC4	NoCDRP	noVariation	dNdS:VII_0_0	-0.8024	11.5066	0.877361	18.7	0.118851	16	7.35069
ENSP00000249373	SMO	NonDomCDRP	0.2571	dNdS:III_(0.15,0.3]	-0.17485	37.0956	0.063712	45.6	0.033918	37.3	19.1868
ENSP00000249389	OPN1SW	NoCDRP	noVariation	dNdS:VII_0_0	0.279959	69.3234	0.369091	33.6	0.02876	40.7	1.14943
ENSP00000249396	SIRT2	NonDomCDRP	0.1203	dNdS:II_(0,0.15]	0.642979	85.4662	1.08e-05	77.8	0.010176	64.9	19.2802
ENSP00000249440	HOXD3	D_nonD_CDRP	0.5027	dNdS:V_(0.5,1]	-0.09902	42.1659	0.407559	32.6	0.034961	36.7	63.6574
ENSP00000249442	MTX2	NoCDRP	noVariation	dNdS:VII_0_0	-0.04569	46.1538	0.081372	44.3	0.018722	50.2	0
ENSP00000249499	HOXD9	DomCDRP	0.3357	dNdS:IV_(0.3,0.5]	0.104369	57.5447	0.422099	32.2	0.069507	24	64.7727
ENSP00000249501	HOXD10	NonDomCDRP	0.4688	dNdS:IV_(0.3,0.5]	-0.0109	48.6311	0.132556	41.4	0.036274	36	45
ENSP00000249504		D_nonD_CDRP	0.2048	dNdS:III_(0.15,0.3]					0.011467	61.7	51.7751
ENSP00000249647	SNAP23	D_nonD_CDRP	noVariation	dNdS:VII_0_0	0.200952	64.4441	0.826508	20.8	0.101458	18.5	67.7725
ENSP00000249700	TMOD2	NoCDRP	0.13	dNdS:II_(0,0.15]	-0.58783	17.1558	0.138408	41.2	0.043399	32.7	33.6182
ENSP00000249749	DLL4	NoCDRP	0.125	dNdS:II_(0,0.15]	-0.75929	12.4154	0.982859	11.3	0.183449	11.9	5.25547
ENSP00000249750	ALDH1A2	NoCDRP	0.1284	dNdS:II_(0,0.15]	-0.94607	8.78625	0.51663	29.5	0.053727	28.4	4.6332
ENSP00000249776	KNSTRN	NonDomCDRP	1.3256	dNdS:VI_>1	0.778996	88.7712	3.16e-07	84.4	0.007241	73.5	54.1139
ENSP00000249861	THAP10	NonDomCDRP	0.1727	dNdS:III_(0.15,0.3]	-0.0532	45.5635	0.001194	64	0.010775	63.5	43.1907
ENSP00000249887	ACKR4	NoCDRP	0.5	dNdS:IV_(0.3,0.5]	0.480629	79.7766	0.007445	56.3	0.014633	55.7	1.14286
ENSP00000249910	MBD4	NonDomCDRP	0.1967	dNdS:III_(0.15,0.3]	0.201253	64.4614	1.7e-06	81.6	0.009648	66.2	20.6897
ENSP00000250003	MYOD1	D_nonD_CDRP	0.1269	dNdS:II_(0,0.15]	-0.38237	25.3111	2.68e-05	75.5			60.625
ENSP00000250018	TPH1	NoCDRP	200	dNdS:VI_>1	-0.13845	39.5439	2.67e-05	75.5	0.003738	87.6	2.47748
ENSP00000250024	E2F8	NonDomCDRP	0.4886	dNdS:IV_(0.3,0.5]	-0.84823	10.5979	0.995041	8.4	0.139854	14.4	48.6736
ENSP00000250066	USP6	DomCDRP	0.66	dNdS:V_(0.5,1]	2.17816	98.8308	1.76e-18	98.3			23.4708
ENSP00000250076	ZNF232	NonDomCDRP	0.3014	dNdS:IV_(0.3,0.5]	-0.64402	15.5756	0.000435	67.5	0.0128	59	45.4955
ENSP00000250092	CD68	D_nonD_CDRP	0.2179	dNdS:III_(0.15,0.3]	-0.07651	43.937	0.0006	66.5	0.008911	68.1	44.3503
ENSP00000250101	TXNDC17	NoCDRP	noVariation	dNdS:VII_0_0	0.139971	60.1783	0.035516	48.9	0.031193	39	0
ENSP00000250111	ATP1B2	NoCDRP	noVariation	dNdS:VII_0_0	-0.59629	16.8027	0.179759	39.3	0.034207	37.1	0.344828
ENSP00000250113	FXR2	D_nonD_CDRP	0.4621	dNdS:IV_(0.3,0.5]	-0.02958	47.3288	0.99977	4.4	0.072283	23.4	47.8455
ENSP00000250124	MPDU1	NoCDRP	noVariation	dNdS:VII_0_0	0.561252	82.7864	0.144211	40.8	0.009502	66.5	1.21457
ENSP00000250160	WISP1	NoCDRP	0.2252	dNdS:III_(0.15,0.3]	0.563314	82.85	0.003328	59.9	0.008883	68.2	2.45232
ENSP00000250237	QTRT1	NoCDRP	noVariation	dNdS:VII_0_0	-0.78004	12.0044	0.000223	69.4	0.011779	60.9	1.98511
ENSP00000250340	CLEC11A	NonDomCDRP	0.0415	dNdS:II_(0,0.15]	0.303275	70.7125	0.002267	61.5			48.2972
ENSP00000250351	KLK12	NoCDRP	0.1417	dNdS:II_(0,0.15]	0.412145	76.4543	0.001824	62.3			0
ENSP00000250366		NoCDRP	noHomolog	dNdS:VIIII_noHomolog							0
ENSP00000250378	CMA1	NoCDRP	0.5652	dNdS:V_(0.5,1]	0.968497	92.3019	4.11e-08	87.3			0.404858
ENSP00000250405	BCL2L2	NoCDRP	0.5294	dNdS:V_(0.5,1]	-0.07858	43.7634	0.312496	35.4	0.008703	68.7	8.80829
ENSP00000250416	PARP2	NonDomCDRP	noVariation	dNdS:VII_0_0	0.18816	63.68	2.1e-07	85.1	0.003993	86.4	18.0103
ENSP00000250448		NonDomCDRP	0.2838	dNdS:III_(0.15,0.3]							41.3136
ENSP00000250454	EAPP	D_nonD_CDRP	0.3882	dNdS:IV_(0.3,0.5]	-0.23981	33.0902	2.72e-05	75.5	0.004633	83.5	67.3684
ENSP00000250457	EGLN3	NoCDRP	noVariation	dNdS:VII_0_0	-0.31308	28.6971	0.002641	60.9	0.006433	76.5	0.41841
ENSP00000250495	NEDD8	NoCDRP	noHomolog	dNdS:VIIII_noHomolog	0.097672	56.9485	0.429441	32	0.21213	9.3	28.3951
ENSP00000250498	DAD1	NoCDRP	noVariation	dNdS:VII_0_0	0.016094	50.7148	0.276497	36.3	0.044845	32.1	0
ENSP00000250535	CDO1	NoCDRP	noVariation	dNdS:VII_0_0	-0.01009	48.6659	0.020073	51.7	0.020697	47.9	7.5
ENSP00000250615	AANAT	NonDomCDRP	0.1926	dNdS:III_(0.15,0.3]	0.52278	81.3509	0.013038	53.8	0.006479	76.3	21.4286
ENSP00000250617	ARHGEF6	NoCDRP	0.4862	dNdS:IV_(0.3,0.5]	-0.17405	37.1419	0.998212	6.8	0.121411	15.8	12.8866
ENSP00000250693	ART1	NoCDRP	0.1493	dNdS:II_(0,0.15]	0.199339	64.3514	1.54e-09	90.8			3.97554
ENSP00000250699	CHRNA10	NoCDRP	0.3071	dNdS:IV_(0.3,0.5]	1.09621	93.8994	1.04e-05	78	0.003619	88.1	5.11111
ENSP00000250784		NoCDRP	0.0804	dNdS:II_(0,0.15]					0.169478	12.8	4.56274
ENSP00000250823		DomCDRP	0.892	dNdS:V_(0.5,1]							0
ENSP00000250825		DomCDRP	0.892	dNdS:V_(0.5,1]							0
ENSP00000250831		D_nonD_CDRP	0.6449	dNdS:V_(0.5,1]							81.25
ENSP00000250863	DAZL	NonDomCDRP	200	dNdS:VI_>1	-0.0682	44.5216	0.961608	13.8	0.114299	16.6	28.8889
ENSP00000250974	ABHD17A	NoCDRP	0.0469	dNdS:II_(0,0.15]	1.06604	93.5753	0.050557	46.9			6.6482
ENSP00000251020	SALL1	NonDomCDRP	0.6418	dNdS:V_(0.5,1]	-0.78124	11.9523	0.994674	8.5	0.195536	10.8	54.7583
ENSP00000251038	ZC3H14	NonDomCDRP	0.1707	dNdS:III_(0.15,0.3]	-1.06311	7.01511	0.999785	4.4	0.147911	13.8	57.2011
ENSP00000251047	LMAN1	NonDomCDRP	0.1737	dNdS:III_(0.15,0.3]	-0.58863	17.1268	0.48607	30.4	0.034859	36.8	23.3333
ENSP00000251074	NUP37	NoCDRP	noVariation	dNdS:VII_0_0	-0.00626	49.0016	0.000998	64.7	0.014627	55.7	0
ENSP00000251089	ANGEL1	NoCDRP	0.1985	dNdS:III_(0.15,0.3]	0.092535	56.5839	3.06e-10	92.1			12.0896
ENSP00000251102	CNGB1	NonDomCDRP	0.5	dNdS:IV_(0.3,0.5]	1.65718	97.76	6.63e-25	99.3	0.003998	86.4	59.8721
ENSP00000251108	CDADC1	NoCDRP	noVariation	dNdS:VII_0_0	-0.2454	32.7487	6.89e-08	86.6	0.006875	74.7	17.3152
ENSP00000251119	ZFYVE26	NonDomCDRP	0.2927	dNdS:III_(0.15,0.3]	-1.43656	3.75644	1.04e-11	94.2	0.015207	54.9	16.1481
ENSP00000251127	NALCN	NonDomCDRP	noVariation	dNdS:VII_0_0	-2.75005	0.758233	0.000169	70.3	0.022646	45.9	11.2198
ENSP00000251166	CORO7	NonDomCDRP	0.2152	dNdS:III_(0.15,0.3]	1.15864	94.6171	7.31e-12	94.4			24.1081
ENSP00000251170	SEC14L5	NonDomCDRP	0.1157	dNdS:II_(0,0.15]	-1.28823	4.77513	6.57e-10	91.5	0.008796	68.4	8.18966
ENSP00000251203	PBX4	NonDomCDRP	0.6131	dNdS:V_(0.5,1]	0.354033	73.676	0.006772	56.7	0.001514	97.1	50.5348
ENSP00000251241	DHX40	NoCDRP	0.2983	dNdS:III_(0.15,0.3]	-1.21349	5.44655	0.996354	7.8	0.144985	14	12.1951
ENSP00000251268	MEGF8	NonDomCDRP	0.078	dNdS:II_(0,0.15]	-1.34465	4.36418	0.973137	12.6	0.032573	38.1	8.78735
ENSP00000251269	ZNF221	NoCDRP	0.9878	dNdS:V_(0.5,1]	1.82061	98.2231	2.58e-09	90.3	0.002829	91.6	5.02431
ENSP00000251287	HCN2	NonDomCDRP	0.1882	dNdS:III_(0.15,0.3]	-1.85042	2.03739	0.832343	20.6	0.071093	23.6	36.4454
ENSP00000251296	IGSF21	NonDomCDRP	0.0396	dNdS:II_(0,0.15]	-0.30432	29.247	0.547299	28.7	0.050178	29.9	22.2698
ENSP00000251303		NoCDRP	1.6727	dNdS:VI_>1							20.7273
ENSP00000251337	GNAT2	NoCDRP	noVariation	dNdS:VII_0_0	-0.02031	47.8787	0.008159	55.8	0.013496	57.9	7.62712
ENSP00000251363	CERS4	NonDomCDRP	0.5065	dNdS:V_(0.5,1]	-0.19273	36.019	2.04e-13	95.8	0.005713	79.2	10.9137
ENSP00000251372	LILRA1	NonDomCDRP	0.831	dNdS:V_(0.5,1]	2.61851	99.2476	1.54e-16	97.7			9.61145
ENSP00000251377	LILRA2	NoCDRP	0.5098	dNdS:V_(0.5,1]	5.70963	99.8669	6.89e-12	94.4			14.9068
ENSP00000251412	TUBG2	NoCDRP	noVariation	dNdS:VII_0_0	-1.03899	7.39712	0.00431	58.8	0.022683	45.9	1.77384
ENSP00000251413	TUBG1	NoCDRP	noVariation	dNdS:VII_0_0	-0.66573	14.8695	0.975923	12.3	0.124677	15.5	1.77384
ENSP00000251472	MAST1	D_nonD_CDRP	0.0536	dNdS:II_(0,0.15]	-2.27991	1.16918	0.999999	1.7	0.132927	14.9	60.7643
ENSP00000251496	NCAPG	NonDomCDRP	0.36	dNdS:IV_(0.3,0.5]	-0.6691	14.7884	0.618144	27	0.025557	43.2	11.6256
ENSP00000251507	RABGAP1L	NonDomCDRP	0.4694	dNdS:IV_(0.3,0.5]	-1.06503	7.00353	0.089173	43.8	0.024409	44.2	19.2638
ENSP00000251535	ALOX12	NoCDRP	0.3117	dNdS:IV_(0.3,0.5]	0.249141	67.4133	6.34e-10	91.5	0.007928	71.1	4.22323
ENSP00000251566	UGT2A3	NoCDRP	0.5899	dNdS:V_(0.5,1]	0.092535	56.5839	5e-06	79.5	0.006496	76.3	0
ENSP00000251582	ADAMTS2	NonDomCDRP	0.1156	dNdS:II_(0,0.15]	-0.61438	16.3512	0.992213	9.4	0.022158	46.3	17.0933
ENSP00000251588	NARFL	NoCDRP	0.076	dNdS:II_(0,0.15]	0.915165	91.3932	1.05e-05	77.9	0.006729	75.3	4.62185
ENSP00000251595		NoCDRP	noHomolog	dNdS:VIIII_noHomolog							0
ENSP00000251642	DHX58	NoCDRP	0.376	dNdS:IV_(0.3,0.5]	0.399355	75.8002	7.29e-08	86.5			4.42478
ENSP00000251643	KRT12	NoCDRP	0.2754	dNdS:III_(0.15,0.3]	0.230308	66.2731	9.44e-11	93	0.005259	81	17.004
ENSP00000251645	KRT31	NoCDRP	0.015	dNdS:II_(0,0.15]	-0.15426	38.4384	0.928538	16.2			3.36538
ENSP00000251646	KRT33B	NoCDRP	0.0655	dNdS:II_(0,0.15]	1.23415	95.3406	2.4e-06	80.9	0.002287	94	1.73267
ENSP00000251691		NonDomCDRP	0.0551	dNdS:II_(0,0.15]							17.8227
ENSP00000251775	SNX4	NonDomCDRP	noVariation	dNdS:VII_0_0	-0.70133	13.8624	0.011062	54.5	0.017168	52	14
ENSP00000251776	ROPN1B	NoCDRP	0.2359	dNdS:III_(0.15,0.3]	0.414866	76.6047	5.67e-05	73.6			3.77358
ENSP00000251808	GRHL2	NoCDRP	noVariation	dNdS:VII_0_0	-1.31472	4.62465	0.999881	3.9	0.229954	7.7	24.48
ENSP00000251864	TDRD1	NonDomCDRP	0.4118	dNdS:IV_(0.3,0.5]	-0.81057	11.3619	0.999761	4.4	0.059675	26.4	14.1295
ENSP00000251900	SCML2	D_nonD_CDRP	1	dNdS:V_(0.5,1]	-0.49029	20.5823	0.998434	6.6	0.325606	2.2	39.1429
ENSP00000251968	TSG101	NonDomCDRP	noVariation	dNdS:VII_0_0	-0.30079	29.409	0.98272	11.3	0.131177	15	29.4872
ENSP00000251993	KIAA0930	NonDomCDRP	noHomolog	dNdS:VIIII_noHomolog	-0.76408	12.3285	0.81529	21.1			27.6284
ENSP00000252011	DHX35	NoCDRP	noHomolog	dNdS:VIIII_noHomolog	-0.42517	23.3316	9.69e-11	93	0.008199	70.2	1.84922
ENSP00000252015	TRPC4AP	NoCDRP	0.0469	dNdS:II_(0,0.15]	-1.06694	6.9688	0.999539	5.1	0.080433	21.9	4.76788
ENSP00000252032	C20orf194	NoCDRP	0.2605	dNdS:III_(0.15,0.3]	-0.77865	12.0507	0.006005	57.2	0.030287	39.7	4.16313
ENSP00000252037	FKBP6	NoCDRP	0.3765	dNdS:IV_(0.3,0.5]	0.426194	77.1778	0.130601	41.5	0.027074	41.9	1.22324
ENSP00000252050	CUL9	D_nonD_CDRP	0.3208	dNdS:IV_(0.3,0.5]	-1.15596	6.02535	0.967476	13.3	0.043986	32.4	16.2495
ENSP00000252085	PCDHGA12	D_nonD_CDRP	noHomolog	dNdS:VIIII_noHomolog	-0.27114	31.1918	0.000728	65.8	0.007724	71.9	20.1717
ENSP00000252087	PCDHGC5	D_nonD_CDRP	noHomolog	dNdS:VIIII_noHomolog	-0.9983	7.8891	2.85e-05	75.3	0.009568	66.3	33.4746
ENSP00000252100	TMCO6	NoCDRP	1.1892	dNdS:VI_>1	-0.25562	32.1468	8.15e-06	78.6	0.009417	66.7	5.01002
ENSP00000252102	NDUFA2	NoCDRP	1.2958	dNdS:VI_>1	0.26848	68.6057	0.339537	34.6	0.047176	31.1	0
ENSP00000252137		D_nonD_CDRP	0.0386	dNdS:II_(0,0.15]							76.0504
ENSP00000252211	ZKSCAN3	D_nonD_CDRP	0.4622	dNdS:IV_(0.3,0.5]	-0.53052	18.979	0.000123	71.3	0.008457	69.4	29.368
ENSP00000252229	MICB	NoCDRP	noHomolog	dNdS:VIIII_noHomolog	0.521971	81.3336	0.000284	68.8			21.1488
ENSP00000252242	KRT5	NoCDRP	noHomolog	dNdS:VIIII_noHomolog	0.466882	79.1746	0.469328	30.9	0.013511	57.8	8.13559
ENSP00000252244	KRT1	DomCDRP	noHomolog	dNdS:VIIII_noHomolog	-0.36721	26.0173	0.973618	12.6	0.088718	20.5	38.9752
ENSP00000252245	KRT75	NoCDRP	noHomolog	dNdS:VIIII_noHomolog	2.03747	98.6282	5.14e-07	83.7	0.002451	93.1	5.44465
ENSP00000252250	KRT6C	NoCDRP	0.0992	dNdS:II_(0,0.15]	0.83837	89.9867	4.11e-12	94.7	0.002514	92.9	8.15603
ENSP00000252252	KRT6B	NoCDRP	0.0671	dNdS:II_(0,0.15]	0.749287	88.0882	0.004793	58.3	0.014395	56.1	8.51064
ENSP00000252268	DPF2	NonDomCDRP	noVariation	dNdS:VII_0_0	-0.52876	19.0774	0.999787	4.3	0.380719	1.2	45.1852
ENSP00000252318	GALNT8	NoCDRP	noHomolog	dNdS:VIIII_noHomolog	0.891852	90.9938	1.87e-10	92.5	0.001869	95.7	1.88383
ENSP00000252321	KCNA5	NonDomCDRP	0.0558	dNdS:II_(0,0.15]	-0.45997	21.9077	0.000687	66	0.010425	64.3	29.8532
ENSP00000252329	PSMG3	NoCDRP	0.3605	dNdS:IV_(0.3,0.5]	0.124964	59.1075	0.194253	38.9	0.029094	40.5	0
ENSP00000252338	FAM155B	NonDomCDRP	noHomolog	dNdS:VIIII_noHomolog	0.252666	67.5927	0.870611	19	0.179887	12.1	23.3051
ENSP00000252453		NoCDRP	0.1667	dNdS:III_(0.15,0.3]							4.54545
ENSP00000252456	CNN1	DomCDRP	noVariation	dNdS:VII_0_0	0.146667	60.7802	0.861521	19.4	0.108398	17.4	39.0572
ENSP00000252483		D_nonD_CDRP	0.2833	dNdS:III_(0.15,0.3]							34.9442
ENSP00000252486	APOE	NoCDRP	0.3719	dNdS:IV_(0.3,0.5]	0.110915	58.0598	0.034534	49	0.011403	61.9	15.7729
ENSP00000252490	APOC2	NoCDRP	0.1918	dNdS:III_(0.15,0.3]	0.63055	85.0726	0.022796	51	0.006615	75.8	12.8713
ENSP00000252505	ALLC	NoCDRP	0.7788	dNdS:V_(0.5,1]	1.16838	94.7213	4.61e-11	93.4			7.16113
ENSP00000252506	GADD45G	NoCDRP	0.2828	dNdS:III_(0.15,0.3]	0.259064	67.9921	0.720982	24	0.195004	10.9	10.6918
ENSP00000252519	ACE2	NoCDRP	0.791	dNdS:V_(0.5,1]	0.150494	61.0291	0.99907	5.8	0.192447	11.1	4.34783
ENSP00000252530	FAM98C	DomCDRP	0.0707	dNdS:II_(0,0.15]	0.98814	92.6202	3.57e-10	92.1			16.6189
ENSP00000252542	SAFB2	NonDomCDRP	0.1485	dNdS:II_(0,0.15]	-0.87074	10.1696	0.999583	5	0.146136	13.9	87.723
ENSP00000252575	NCAN	NonDomCDRP	0.5596	dNdS:V_(0.5,1]	-1.15467	6.04272	0.154547	40.4	0.032084	38.4	53.0659
ENSP00000252590	PLVAP	DomCDRP	0.1795	dNdS:III_(0.15,0.3]	-0.51169	19.7604	0.000801	65.5	0.015625	54.2	29.638
ENSP00000252593	BST2	NoCDRP	0.3248	dNdS:IV_(0.3,0.5]	0.087449	56.2598	0.000609	66.4	0.006747	75.2	0.555556
ENSP00000252595	SLC27A1	NoCDRP	0.0495	dNdS:II_(0,0.15]	-1.24703	5.13978	0.00034	68.3	0.01399	56.9	0.309598
ENSP00000252597	USHBP1	NonDomCDRP	0.8321	dNdS:V_(0.5,1]	0.766209	88.4702	3.28e-13	95.7	0.003958	86.5	61.4509
ENSP00000252599	COLGALT1	NoCDRP	0.0189	dNdS:II_(0,0.15]	-0.20582	35.1508	0.00373	59.3	0.022678	45.9	10.6109
ENSP00000252603	PGLS	NoCDRP	0.0714	dNdS:II_(0,0.15]	0.346381	73.2129	0.042058	48	0.00825	70.1	8.13953
ENSP00000252622		NoCDRP	noVariation	dNdS:VII_0_0							6.79612
ENSP00000252655	RSPH3	D_nonD_CDRP	0.8	dNdS:V_(0.5,1]	1.4556	96.7413	0.001396	63.4	0.008793	68.4	50.3571
ENSP00000252660	MAS1	NoCDRP	0.6027	dNdS:V_(0.5,1]	-0.03245	47.1378	0.000871	65.2	0.002514	92.9	0
ENSP00000252674	MLLT1	NonDomCDRP	0.1241	dNdS:II_(0,0.15]	-0.781	11.9755	0.991457	9.6	0.227559	7.8	64.0429
ENSP00000252675	FUT5	NoCDRP	0.1195	dNdS:II_(0,0.15]	1.36172	96.1973	0.002358	61.3	0.008662	68.8	5.34759
ENSP00000252677	BMP15	NoCDRP	0.9157	dNdS:V_(0.5,1]	0.607228	84.3723	0.053544	46.6	0.027005	41.9	10.4592
ENSP00000252699	ACTN4	NoCDRP	noVariation	dNdS:VII_0_0	-1.49467	3.39179	0.99999	2.5	0.404807	0.9	8.89133
ENSP00000252723	EPO	NoCDRP	0.186	dNdS:III_(0.15,0.3]	0.453338	78.4858	0.116862	42.3	0.016629	52.8	0
ENSP00000252729	CACNG6	NoCDRP	0.1701	dNdS:III_(0.15,0.3]	0.475848	79.5508	0.180523	39.3	0.001162	98.3	6.15385
ENSP00000252744		NonDomCDRP	0.272	dNdS:III_(0.15,0.3]							12.9218
ENSP00000252797	ZNF764	NonDomCDRP	0.1316	dNdS:II_(0,0.15]	0.418841	76.7784	3.07e-08	87.6			38.7255
ENSP00000252804	PXDN	NoCDRP	0.1076	dNdS:II_(0,0.15]	-1.37505	4.1153	2.04e-05	76.2	0.022072	46.4	8.6545
ENSP00000252809	GDF15	NoCDRP	0.3714	dNdS:IV_(0.3,0.5]	-0.29888	29.5364	0.000282	68.8	0.008735	68.6	21.7532
ENSP00000252818		DomCDRP	noHomolog	dNdS:VIIII_noHomolog							57.9251
ENSP00000252825	HRC	D_nonD_CDRP	0.98	dNdS:V_(0.5,1]	2.87665	99.4501	3.14e-05	75.1	0.003198	90.1	85.98
ENSP00000252826	TRPM4	NoCDRP	0.6357	dNdS:V_(0.5,1]	-0.56363	17.8098	6.36e-19	98.4			5.3542
ENSP00000252835		NoCDRP	4.7632	dNdS:VI_>1							0
ENSP00000252840	ZNF557	NoCDRP	0.2109	dNdS:III_(0.15,0.3]	-0.18059	36.7078	1.51e-06	81.9	0.004917	82.4	9.06977
ENSP00000252891		D_nonD_CDRP	0.2795	dNdS:III_(0.15,0.3]					0.009253	67.1	70.4433
ENSP00000252898	TNNI2	NoCDRP	0.0673	dNdS:II_(0,0.15]	-0.35715	26.4687	0.086153	44	0.024071	44.5	57.1429
ENSP00000252934	ATXN10	NoCDRP	0.2396	dNdS:III_(0.15,0.3]	-0.21907	34.3868	0.745163	23.3	0.051572	29.3	4.21053
ENSP00000252939		NonDomCDRP	0.4048	dNdS:IV_(0.3,0.5]							44.2396
ENSP00000252945	CYP2E1	NoCDRP	0.654	dNdS:V_(0.5,1]	0.125266	59.1538	0.265926	36.6	0.023744	44.8	0.608519
ENSP00000252951		NoCDRP	0.4253	dNdS:IV_(0.3,0.5]							0
ENSP00000252971		NonDomCDRP	0.0189	dNdS:II_(0,0.15]							54.8628
ENSP00000252979	ZNF337	NonDomCDRP	0.2683	dNdS:III_(0.15,0.3]	-0.47961	21.028	2.29e-09	90.4	0.006574	75.9	13.8482
ENSP00000252992	CEP85	D_nonD_CDRP	0.2364	dNdS:III_(0.15,0.3]	-0.0331	47.0741	0.005851	57.4	0.025941	42.8	55.2493
ENSP00000252996	TAF4	D_nonD_CDRP	0.1901	dNdS:III_(0.15,0.3]	-1.32126	4.55519	0.999487	5.2	0.378311	1.2	75.576
ENSP00000252997		D_nonD_CDRP	0.027	dNdS:II_(0,0.15]							50.1259
ENSP00000252998	RBBP8NL	NonDomCDRP	0.7515	dNdS:V_(0.5,1]	1.10739	94.0152	0.007488	56.3	0.016306	53.3	82.2289
ENSP00000252999	LAMA5	NonDomCDRP	noHomolog	dNdS:VIIII_noHomolog	7.64181	99.919	0.943038	15.4	0.029578	40.1	8.68742
ENSP00000253003	ADRM1	NonDomCDRP	noVariation	dNdS:VII_0_0	-0.47704	21.1495	0.981918	11.4	0.214228	9.1	51.3514
ENSP00000253008	PRDM12	NoCDRP	0.2005	dNdS:III_(0.15,0.3]	-0.38716	25.0912	0.29787	35.8	0.04215	33.2	14.1689
ENSP00000253023	UBE2M	NoCDRP	0.6472	dNdS:V_(0.5,1]	-0.03547	46.9121	0.619518	27	0.032211	38.3	7.65027
ENSP00000253024	TRIM28	NonDomCDRP	0.1604	dNdS:III_(0.15,0.3]	-1.20105	5.56231	0.999902	3.8	0.401653	0.9	36.6467
ENSP00000253031	YIPF2	NoCDRP	0.2697	dNdS:III_(0.15,0.3]	1.6825	97.8469	0.001099	64.3	0.012891	58.8	14.8734
ENSP00000253039	EIF2S3	NoCDRP	noHomolog	dNdS:VIIII_noHomolog	0.437376	77.7566	0.916324	16.9	0.033001	37.8	2.75424
ENSP00000253047		NoCDRP	0.0996	dNdS:II_(0,0.15]					0.209558	9.6	21.8085
ENSP00000253048	ZC3H4	NonDomCDRP	0.0909	dNdS:II_(0,0.15]	-1.14895	6.08902	1	1.3	0.499928	0.3	93.6301
ENSP00000253055	MAP3K10	NonDomCDRP	0.0206	dNdS:II_(0,0.15]	-0.98631	8.10905	0.792721	21.9	0.057879	27.1	49.8952
ENSP00000253063	SESN2	DomCDRP	0.1365	dNdS:II_(0,0.15]	0.129898	59.4143	0.000764	65.6	0.004668	83.3	21.6667
ENSP00000253079	CCDC62	NoCDRP	0.3739	dNdS:IV_(0.3,0.5]	0.417079	76.6973	1.44e-12	95.1	0.007271	73.4	23.2456
ENSP00000253083	HIP1R	NonDomCDRP	0.2316	dNdS:III_(0.15,0.3]	-1.29465	4.72883	1.44e-06	82	0.011664	61.2	27.1536
ENSP00000253107	PPAN	D_nonD_CDRP	0.2184	dNdS:III_(0.15,0.3]	0.236049	66.5683	1.17e-08	88.7			42.9175
ENSP00000253108	EIF3G	D_nonD_CDRP	noVariation	dNdS:VII_0_0	-0.45181	22.1971	0.983422	11.2	0.203523	10.1	57.8125
ENSP00000253110	C19orf66	NoCDRP	0.1925	dNdS:III_(0.15,0.3]	0.134381	59.7963	0.930535	16.1	0.293401	3.2	33.677
ENSP00000253115	ZNF426	NoCDRP	1.4595	dNdS:VI_>1	-0.79777	11.6397	5.95e-13	95.5	0.003979	86.4	1.80505
ENSP00000253122	SLC6A8	NoCDRP	noHomolog	dNdS:VIIII_noHomolog	0.099736	57.1916	0.99189	9.5	0.272904	4.3	1.5748
ENSP00000253188	SLC7A10	NoCDRP	0.2638	dNdS:III_(0.15,0.3]	0.223762	65.8621	0.001577	62.9	0.008352	69.8	8.03059
ENSP00000253193	LRP3	NonDomCDRP	0.0957	dNdS:II_(0,0.15]	-0.323	28.0778	0.039237	48.4	0.020936	47.6	22.987
ENSP00000253237	GRWD1	NonDomCDRP	0.0925	dNdS:II_(0,0.15]	0.236854	66.6377	0.337779	34.6	0.041771	33.4	26.6816
ENSP00000253247	NOL11	NoCDRP	0.0843	dNdS:II_(0,0.15]	0.30549	70.8225	0.027829	50.1	0.025391	43.3	3.33797
ENSP00000253255	PKDREJ	NonDomCDRP	0.7912	dNdS:V_(0.5,1]	-0.19347	35.9148	4.71e-20	98.7	0.005179	81.4	5.37062
ENSP00000253262		DomCDRP	0.9341	dNdS:V_(0.5,1]							70.7672
ENSP00000253270	SLC35D2	NoCDRP	0.3784	dNdS:IV_(0.3,0.5]	-0.12168	40.632	9.13e-05	72.2	0.006513	76.2	1.18694
ENSP00000253329	PPIL4	NonDomCDRP	0.0796	dNdS:II_(0,0.15]	-0.29888	29.5364	1.68e-05	76.7	0.011522	61.5	35.7724
ENSP00000253332	AKAP12	D_nonD_CDRP	0.4926	dNdS:IV_(0.3,0.5]	1.07472	93.6968	0.372502	33.5	0.043014	32.8	95.2301
ENSP00000253354	BPIFB1	NoCDRP	0.5766	dNdS:V_(0.5,1]	1.11122	94.073	5.77e-07	83.5	0.007856	71.4	0.206612
ENSP00000253363	RBM39	NonDomCDRP	noHomolog	dNdS:VIIII_noHomolog	-0.56915	17.6535	0.999997	2.1	0.445057	0.5	31.6981
ENSP00000253381	DEFB118	NoCDRP	1.6596	dNdS:VI_>1	0.404494	76.0433	0.089119	43.8	0.011192	62.4	29.2683
ENSP00000253382	ACSS2	NonDomCDRP	noHomolog	dNdS:VIIII_noHomolog	-0.54633	18.3365	8.97e-11	93	0.014838	55.5	7.14286
ENSP00000253407		D_nonD_CDRP	0.2294	dNdS:III_(0.15,0.3]							41.0853
ENSP00000253410	HIGD1B	NoCDRP	noVariation	dNdS:VII_0_0	0.163437	62.0247	0.002346	61.3	0.002361	93.6	2.0202
ENSP00000253413	ATP6V1E1	NoCDRP	noHomolog	dNdS:VIIII_noHomolog	0.140927	60.2651	0.882472	18.5	0.104505	18	0.884956
ENSP00000253457	EMC8	NoCDRP	noVariation	dNdS:VII_0_0	-0.18266	36.5688	0.259008	36.8	0.038484	34.9	2.38095
ENSP00000253458		D_nonD_CDRP	0.0898	dNdS:II_(0,0.15]							82.0871
ENSP00000253462	GINS2	NoCDRP	0.0488	dNdS:II_(0,0.15]	-0.05974	45.1178	6.08e-09	89.4	0.006942	74.5	12.4324
ENSP00000253490	FAM153B	DomCDRP	2.812	dNdS:VI_>1	1.66367	97.7832	0.64749	26.1	0.007191	73.7	61.4987
ENSP00000253496	F12	NonDomCDRP	0.6548	dNdS:V_(0.5,1]	0.270693	68.733	3.46e-06	80.3	0.003556	88.4	10.0813
ENSP00000253577	ABCB7	NoCDRP	noHomolog	dNdS:VIIII_noHomolog	0.533152	81.7735	0.995048	8.4			5.57769
ENSP00000253669	HAUS8	NonDomCDRP	0.6729	dNdS:V_(0.5,1]	0.199339	64.3514	0.000726	65.8	0.012977	58.7	55.6098
ENSP00000253673		NoCDRP	0.7817	dNdS:V_(0.5,1]							3.37423
ENSP00000253686	MRPS25	NoCDRP	noVariation	dNdS:VII_0_0	0.40545	76.1185	0.545529	28.7	0.067443	24.5	9.82659
ENSP00000253693	CAPN7	NoCDRP	0.2377	dNdS:III_(0.15,0.3]	-1.45251	3.64068	5.29e-07	83.6	0.015418	54.6	3.44403
ENSP00000253697	C3orf20	NoCDRP	0.2057	dNdS:III_(0.15,0.3]	0.744818	87.9724	2.36e-14	96.5			18.1416
ENSP00000253699		D_nonD_CDRP	0.4353	dNdS:IV_(0.3,0.5]							55.2296
ENSP00000253719	NAPSA	NoCDRP	0.6915	dNdS:V_(0.5,1]	0.503288	80.5811	7.96e-07	83	0.004639	83.4	1.66667
ENSP00000253727	NR1H2	NonDomCDRP	noVariation	dNdS:VII_0_0	-0.77908	12.0391	0.821873	20.9	0.1183	16.1	32.1739
ENSP00000253754	PDLIM4	D_nonD_CDRP	noVariation	dNdS:VII_0_0	-0.01936	47.9597	0.924089	16.4	0.274541	4.2	58.4848
ENSP00000253778	GFPT2	NoCDRP	0.2379	dNdS:III_(0.15,0.3]	-1.61953	2.76668	6.63e-07	83.2	0.006185	77.4	1.17302
ENSP00000253792	ACLY	NonDomCDRP	0.0474	dNdS:II_(0,0.15]	-1.67943	2.50622	0.996415	7.8	0.021618	46.9	7.35695
ENSP00000253794	VPS25	NoCDRP	noVariation	dNdS:VII_0_0	-0.12455	40.4642	0.735078	23.6	0.06448	25.1	1.13636
ENSP00000253799	AOC2	NoCDRP	0.1597	dNdS:III_(0.15,0.3]	-0.41002	23.9509	5.14e-10	91.7			7.27513
ENSP00000253801	G6PC	NoCDRP	0.3096	dNdS:IV_(0.3,0.5]	-0.08688	43.0688	0.001811	62.3	0.011867	60.7	0
ENSP00000253807	PCDHAC1	DomCDRP	noHomolog	dNdS:VIIII_noHomolog	0.222307	65.7406	4.58e-09	89.7	0.004504	84	25.5452
ENSP00000253812	PCDHGA3	D_nonD_CDRP	noHomolog	dNdS:VIIII_noHomolog	-0.31329	28.6508	0.000592	66.5	0.009349	66.9	17.4893
ENSP00000253814	NDFIP1	NoCDRP	200	dNdS:VI_>1	-0.14897	38.8204	0.920197	16.7	0.080188	21.9	12.6697
ENSP00000253861	EXOC4	NoCDRP	0.0632	dNdS:II_(0,0.15]	-0.91194	9.35926	0.000727	65.8	0.018771	50.1	5.95483
ENSP00000253925	PPFIA1	D_nonD_CDRP	0.1515	dNdS:III_(0.15,0.3]	-0.90144	9.56184	1	1.2	0.217653	8.8	60.7321
ENSP00000253928		DomCDRP	0.1829	dNdS:III_(0.15,0.3]							41.2011
ENSP00000253934	TMEM204	NoCDRP	0.1897	dNdS:III_(0.15,0.3]	0.009699	50.2923	0.902171	17.7	0.278755	4	1.76991
ENSP00000253968		NonDomCDRP	noVariation	dNdS:VII_0_0							44.8819
ENSP00000254029	WDR44	NonDomCDRP	noHomolog	dNdS:VIIII_noHomolog	0.279959	69.3234	0.999844	4.2	0.36516	1.4	51.1501
ENSP00000254051	TNS4	NonDomCDRP	1.3784	dNdS:VI_>1	-0.07157	44.3132	0.000131	71.1	0.009073	67.6	50.3497
ENSP00000254072	KRTAP9-8	NoCDRP	noHomolog	dNdS:VIIII_noHomolog	0.789222	88.9738	0.043754	47.7	0.01928	49.5	0
ENSP00000254090	FMO5	NoCDRP	0.4286	dNdS:IV_(0.3,0.5]	0.558681	82.7401	3.69e-15	96.9	0.002283	94	0
ENSP00000254101	PRKAB2	NonDomCDRP	1.027	dNdS:VI_>1	0.133424	59.6979	0.767108	22.7	0.089431	20.3	27.9412
ENSP00000254166	ZNF132	NoCDRP	0.5888	dNdS:V_(0.5,1]	-0.36706	26.0288	8.15e-13	95.3	0.004089	85.9	3.68272
ENSP00000254190	CHSY1	NoCDRP	0.1008	dNdS:II_(0,0.15]	-0.72354	13.3183	0.913667	17.1	0.09848	18.9	9.35162
ENSP00000254193	SNRPA1	NonDomCDRP	noVariation	dNdS:VII_0_0	0.072443	55.0906	0.969078	13.1	0.312994	2.5	27.0588
ENSP00000254227	NR0B2	NoCDRP	0.1602	dNdS:III_(0.15,0.3]	0.670124	86.2071	5.83e-08	86.8	0.002145	94.6	3.50195
ENSP00000254231	LIN28A	NoCDRP	0.2	dNdS:III_(0.15,0.3]	0.089362	56.3929	0.19627	38.8	0.031671	38.7	30.1435
ENSP00000254235	ADCY7	DomCDRP	0.1429	dNdS:II_(0,0.15]	-0.40988	23.9567	0.017721	52.2	0.00804	70.7	8.24074
ENSP00000254250	THAP1	NoCDRP	noVariation	dNdS:VII_0_0	0.063983	54.4886	0.899169	17.8	0.283741	3.7	19.2488
ENSP00000254260	RHPN2	NoCDRP	0.2443	dNdS:III_(0.15,0.3]	1.53735	97.1523	0.000337	68.3	0.014945	55.3	6.26822
ENSP00000254286	ACTR10	NoCDRP	0.3793	dNdS:IV_(0.3,0.5]	-0.15441	38.4268	0.004736	58.4	0.020873	47.7	3.83693
ENSP00000254301	LGALS3	NonDomCDRP	1	dNdS:V_(0.5,1]	0.274219	68.9414	0.000175	70.2	0.005929	78.4	38.8
ENSP00000254322	DNAJB1	NoCDRP	0.0332	dNdS:II_(0,0.15]	-1.17964	5.81698	0.372157	33.6	0.005299	80.9	34.7059
ENSP00000254323	ZSWIM4	NonDomCDRP	0.1135	dNdS:II_(0,0.15]	-1.0114	7.70967	0.165803	39.9	0.006142	77.6	5.05561
ENSP00000254325	RFX1	D_nonD_CDRP	0.0209	dNdS:II_(0,0.15]	-0.23377	33.4491	0.998753	6.2	0.122281	15.7	42.9009
ENSP00000254337	DCAF15	NoCDRP	0.1885	dNdS:III_(0.15,0.3]	-0.71986	13.4167	0.99506	8.4	0.17304	12.5	20.6667
ENSP00000254436	TRIM21	NoCDRP	noVariation	dNdS:VII_0_0	0.017354	50.8537	0.093052	43.6	0.017602	51.4	2.52632
ENSP00000254442	WDR7	NonDomCDRP	0.1116	dNdS:II_(0,0.15]	-1.45403	3.62331	1	0.9	0.244205	6.4	11.2752
ENSP00000254480	SMARCC1	D_nonD_CDRP	0.1842	dNdS:III_(0.15,0.3]	-0.72626	13.2315	1	1.4	0.208387	9.7	52.1267
ENSP00000254488	SLC6A11	NoCDRP	0.0687	dNdS:II_(0,0.15]	-0.60172	16.658	0.364943	33.8	0.038956	34.7	3.00633
ENSP00000254508	NUP210	NoCDRP	0.2152	dNdS:III_(0.15,0.3]	0.179193	63.1128	1.45e-10	92.7	0.008518	69.3	3.49762
ENSP00000254521	HSD17B7	NoCDRP	0.1373	dNdS:II_(0,0.15]	-0.24636	32.6735	0.001755	62.4	0.010044	65.2	0
ENSP00000254528	EMILIN2	D_nonD_CDRP	0.3543	dNdS:IV_(0.3,0.5]	0.304842	70.7704	1.6e-09	90.7	0.007663	72.1	41.5954
ENSP00000254579		D_nonD_CDRP	0.5625	dNdS:V_(0.5,1]							7.91079
ENSP00000254605	RRP8	NonDomCDRP	0.8095	dNdS:V_(0.5,1]	-0.20487	35.1855	6.4e-06	79.1	0.003347	89.4	53.0702
ENSP00000254627	OC90	NoCDRP	0.7014	dNdS:V_(0.5,1]	0.900158	91.0922	8.17e-09	89.2	0.005703	79.3	15.0943
ENSP00000254630	PTCD3	NoCDRP	0.2335	dNdS:III_(0.15,0.3]	-0.42709	23.2332	1.03e-06	82.5	0.012549	59.5	7.25689
ENSP00000254654	ILKAP	NonDomCDRP	noVariation	dNdS:VII_0_0	-0.38429	25.2127	0.992508	9.3	0.238434	6.9	30.8673
ENSP00000254657	PER2	D_nonD_CDRP	0.2368	dNdS:III_(0.15,0.3]	0.288235	69.7633	0.933005	15.9	0.049722	30.1	48.4462
ENSP00000254661	RAMP1	NoCDRP	0.4255	dNdS:IV_(0.3,0.5]	0.028381	51.6698	0.057793	46.2	0.009071	67.6	0
ENSP00000254663	SCLY	NonDomCDRP	0.3513	dNdS:IV_(0.3,0.5]	0.309165	71.0193	1.52e-06	81.9	0.01088	63.2	21.8543
ENSP00000254667	PTPRE	NoCDRP	0.1238	dNdS:II_(0,0.15]	-0.68698	14.3023	0.01001	54.9	0.026996	42	6.71429
ENSP00000254691	CARD6	D_nonD_CDRP	1.1351	dNdS:VI_>1	1.63699	97.679	1.46e-16	97.7	0.004813	82.7	35.2941
ENSP00000254719	RPA1	NonDomCDRP	0.1316	dNdS:II_(0,0.15]	-0.59981	16.7274	0.308711	35.5	0.034645	36.9	8.11688
ENSP00000254722	SERPINF1	NoCDRP	0.1365	dNdS:II_(0,0.15]	0.693739	86.757	8.29e-05	72.4	0.012186	60.1	8.37321
ENSP00000254730	EEFSEC	NoCDRP	0.2767	dNdS:III_(0.15,0.3]	-0.08386	43.3003	0.013115	53.8	0.026859	42.1	13.4228
ENSP00000254759	COQ3	NoCDRP	200	dNdS:VI_>1	0.582953	83.6141	7.06e-10	91.4	0.005355	80.6	1.35501
ENSP00000254765	POPDC3	NoCDRP	0.058767	dNdS:II_(0,0.15]	0.031252	51.9245	1.71e-05	76.7	0.006494	76.3	0
ENSP00000254770	LANCL2	NoCDRP	0.141	dNdS:II_(0,0.15]	-0.09343	42.5942	0.78676	22.1	0.053065	28.7	3.77778
ENSP00000254799	GRSF1	NoCDRP	0.5306	dNdS:V_(0.5,1]	-0.38046	25.4269	7.98e-07	82.9	0.007671	72	16.0417
ENSP00000254803	UTP3	D_nonD_CDRP	0.2209	dNdS:III_(0.15,0.3]	-0.08497	43.2019	0.002777	60.7	0.017117	52.1	52.4008
ENSP00000254806	WBP2	NonDomCDRP	noVariation	dNdS:VII_0_0	-0.14419	39.1098	0.089618	43.8	0.022818	45.7	26.4368
ENSP00000254816	TRIM47	NonDomCDRP	0.1502	dNdS:III_(0.15,0.3]	-0.08864	42.9357	0.321925	35.1	0.048287	30.6	20.6897
ENSP00000254846	KDM6B	NonDomCDRP	0.4605	dNdS:IV_(0.3,0.5]	-0.35038	26.7697	0.999994	2.3	0.146792	13.9	67.7765
ENSP00000254854	GUCY2D	NonDomCDRP	0.2525	dNdS:III_(0.15,0.3]	-1.37256	4.12687	0.000772	65.6	0.017645	51.3	7.07162
ENSP00000254868	CLEC10A	NoCDRP	0.367	dNdS:IV_(0.3,0.5]	1.06509	93.5637	4.25e-08	87.2			5.06329
ENSP00000254900	BRD8	NonDomCDRP	0.3433	dNdS:IV_(0.3,0.5]	-0.35559	26.5497	0.000591	66.5	0.018798	50.1	57.4089
ENSP00000254928	ERAL1	NoCDRP	0.3333	dNdS:IV_(0.3,0.5]	-0.03053	47.2536	1.04e-06	82.5	0.00681	75	8.00915
ENSP00000254940	NIP7	NoCDRP	noVariation	dNdS:VII_0_0	-0.22959	33.7443	0.603152	27.4	0.075177	22.9	0
ENSP00000254942		NonDomCDRP	0.6171	dNdS:V_(0.5,1]					0.050221	29.9	55.3506
ENSP00000254950	VPS4A	NonDomCDRP	noVariation	dNdS:VII_0_0	-0.24077	32.9976	0.912321	17.2	0.074641	23	17.3913
ENSP00000254958	JAG1	NonDomCDRP	0.067	dNdS:II_(0,0.15]	-0.52161	19.3842	1	1.4	0.313619	2.5	10.9195
ENSP00000254963	HSPA12B	NonDomCDRP	0.4615	dNdS:IV_(0.3,0.5]	0.175873	62.9276	0.010508	54.7	0.017973	51	10.9329
ENSP00000254998	NXT1	NoCDRP	noVariation	dNdS:VII_0_0	0.001088	49.5514	0.57474	28.1	0.178172	12.3	0
ENSP00000255006	RIN2	NonDomCDRP	0.3846	dNdS:IV_(0.3,0.5]	1.32068	95.9136	0.008296	55.7	0.025847	42.9	27.7542
ENSP00000255008	SSTR4	NoCDRP	0.1238	dNdS:II_(0,0.15]	0.069875	54.888	8.69e-05	72.3	0.003409	89.1	3.09278
ENSP00000255030	CRP	NoCDRP	0.7778	dNdS:V_(0.5,1]	0.016246	50.7553	3.06e-05	75.2	0.002448	93.2	0
ENSP00000255039	HAPLN2	NoCDRP	noHomolog	dNdS:VIIII_noHomolog	-0.07762	43.8328	1.05e-05	77.9			1.17647
ENSP00000255040	APCS	NoCDRP	0.8447	dNdS:V_(0.5,1]	0.166306	62.2504	0.038638	48.5	0.010988	62.9	0
ENSP00000255078	IGHMBP2	D_nonD_CDRP	0.2185	dNdS:III_(0.15,0.3]	0.931612	91.7463	1.51e-08	88.4	0.006074	77.9	30.715
ENSP00000255082	ACY3	NoCDRP	0.1181	dNdS:II_(0,0.15]	0.200145	64.392	1.88e-07	85.2	0.005707	79.3	10.0313
ENSP00000255084	ALDH3B2	NoCDRP	0.3682	dNdS:IV_(0.3,0.5]	2.84165	99.4154	0.000359	68.1	0.001329	97.7	0.25974
ENSP00000255087		NoCDRP	1.4032	dNdS:VI_>1							16.7323
ENSP00000255108	DPH2	NoCDRP	noHomolog	dNdS:VIIII_noHomolog	-0.02958	47.3288	0.006847	56.7	0.023578	45	15.5419
ENSP00000255120	NASP	NonDomCDRP	0.3333	dNdS:IV_(0.3,0.5]	-0.45247	22.1624	0.470216	30.9	0.01291	58.8	71.4467
ENSP00000255136	PABPC1L	NonDomCDRP	0.0402	dNdS:II_(0,0.15]	0.408619	76.2806	0.99335	9.1	0.13346	14.8	18.4039
ENSP00000255152	ZSWIM3	NoCDRP	0.7	dNdS:V_(0.5,1]	0.183528	63.4427	0.001413	63.3	0.011804	60.8	14.6552
ENSP00000255189	DMGDH	NoCDRP	0.1694	dNdS:III_(0.15,0.3]	0.052301	53.5336	8.9e-17	97.7			4.84988
ENSP00000255192	BHMT2	NoCDRP	0.4607	dNdS:IV_(0.3,0.5]	0.300555	70.562	2.74e-12	94.9			1.37741
ENSP00000255194	AP3B1	DomCDRP	0.4286	dNdS:IV_(0.3,0.5]	-0.10048	42.0733	0.995386	8.3	0.026602	42.3	22.6691
ENSP00000255198		NonDomCDRP	noHomolog	dNdS:VIIII_noHomolog							81.1966
ENSP00000255224	SYT4	NoCDRP	noVariation	dNdS:VII_0_0	-0.17692	36.9451	0.127605	41.7	0.0519	29.2	13.1765
ENSP00000255262	NMUR2	NoCDRP	0.567	dNdS:V_(0.5,1]	1.03986	93.2627	0.421657	32.2			0
ENSP00000255266	PDE6A	NonDomCDRP	0.1135	dNdS:II_(0,0.15]	1.12846	94.293	6.61e-12	94.5	0.005627	79.6	5.69767
ENSP00000255304	USPL1	DomCDRP	0.3314	dNdS:IV_(0.3,0.5]	-0.0751	44.0065	0.491297	30.2	0.038828	34.7	35.1648
ENSP00000255324	RNF17	NonDomCDRP	0.2606	dNdS:III_(0.15,0.3]	-0.04111	46.4722	1	0.8			7.57856
ENSP00000255380	CHRM3	NonDomCDRP	0.0909	dNdS:II_(0,0.15]	-0.2162	34.5141	0.937026	15.8	0.255746	5.4	12.8814
ENSP00000255381	MYH4	DomCDRP	0.2476	dNdS:III_(0.15,0.3]	1.14535	94.4782	8.81e-35	99.8			36.5652
ENSP00000255389	PEMT	NoCDRP	0.4081	dNdS:IV_(0.3,0.5]	0.539699	82.0455	0.367753	33.7	0.040733	33.8	2.9661
ENSP00000255390	SCO1	NoCDRP	0.3526	dNdS:IV_(0.3,0.5]	-0.15824	38.1432	0.507629	29.7	0.033819	37.4	14.2857
ENSP00000255409	CHI3L1	NoCDRP	0.1513	dNdS:III_(0.15,0.3]	1.19935	95.0049	0.001126	64.2	0.004951	82.2	2.34987
ENSP00000255416	MYBPH	NonDomCDRP	0.9444	dNdS:V_(0.5,1]	0.414208	76.57	3.22e-11	93.6	0.001472	97.3	28.5115
ENSP00000255465	CCNA1	NoCDRP	0.4516	dNdS:IV_(0.3,0.5]	-0.09997	42.108	0.009906	55	0.013945	57	5.80645
ENSP00000255476		NonDomCDRP	0.2905	dNdS:III_(0.15,0.3]					0.060901	26.1	72.4265
ENSP00000255499	RNF128	NonDomCDRP	0.2937	dNdS:III_(0.15,0.3]	0.535065	81.8834	0.768185	22.7	0.18907	11.4	21.2617
ENSP00000255608	BTBD2	NonDomCDRP	0.0273	dNdS:II_(0,0.15]	-1.13462	6.19899	0.987679	10.5	0.236848	7	16.5714
ENSP00000255613		NonDomCDRP	0.3671	dNdS:IV_(0.3,0.5]							18.1818
ENSP00000255641	CSNK1G2	D_nonD_CDRP	0.0724	dNdS:II_(0,0.15]	-0.3514	26.6944	0.923449	16.5	0.202202	10.2	20.7229
ENSP00000255681	MACROD1	NoCDRP	0.0566	dNdS:II_(0,0.15]	-0.19575	35.7875	0.006625	56.8			5.84615
ENSP00000255688	RARRES3	NoCDRP	200	dNdS:VI_>1	-0.1311	39.9838	0.000504	67	0.0061	77.7	3.65854
ENSP00000255695	HRASLS2	NoCDRP	0.5246	dNdS:V_(0.5,1]	0.17094	62.5745	0.018274	52.1	0.013643	57.6	4.32099
ENSP00000255746	ZNF679	NoCDRP	0.4451	dNdS:IV_(0.3,0.5]	0.804376	89.2227	1.43e-09	90.8	0.006751	75.2	3.40633
ENSP00000255764	MED10	NoCDRP	noVariation	dNdS:VII_0_0	0.009548	50.2576	0.039721	48.3	0.020932	47.6	8.88889
ENSP00000255784	CCDC134	NoCDRP	0.7193	dNdS:V_(0.5,1]	-0.32618	27.9678	0.000741	65.8	0.008808	68.4	13.1004
ENSP00000255858	SEC14L4	NoCDRP	0.1803	dNdS:III_(0.15,0.3]	0.737802	87.793	5.6e-05	73.6			7.88177
ENSP00000255882	PI4KA	NoCDRP	0.0553	dNdS:II_(0,0.15]	-3.52736	0.364647	0.000804	65.5	0.014339	56.2	3.09229
ENSP00000255977	MKRN1	NoCDRP	0.2151	dNdS:III_(0.15,0.3]	-0.19943	35.5328	0.979424	11.8	0.124858	15.4	20.5394
ENSP00000256001	ACTR3B	NoCDRP	noVariation	dNdS:VII_0_0	-0.36928	25.8899	0.997547	7.2	0.27756	4	0.717703
ENSP00000256010	NTS	NoCDRP	0.3529	dNdS:IV_(0.3,0.5]	0.079946	55.6983	7.97e-06	78.6	0.002904	91.3	4.11765
ENSP00000256015	BTG1	NoCDRP	noVariation	dNdS:VII_0_0	-0.17053	37.3618	0.483158	30.5	0.072611	23.3	4.67836
ENSP00000256078	KRAS	NoCDRP	noVariation	dNdS:VII_0_0	-0.16398	37.7612	0.001061	64.5	0.003184	90.2	0.529101
ENSP00000256079	IPO8	NonDomCDRP	0.0891	dNdS:II_(0,0.15]	-0.94019	8.8557	0.979784	11.8	0.058128	27	6.94311
ENSP00000256103	PMP2	NoCDRP	noVariation	dNdS:VII_0_0	0.563975	82.8674	0.033982	49.1	0.018828	50	0
ENSP00000256104	FABP4	NoCDRP	noVariation	dNdS:VII_0_0	0.109002	57.9151	0.004926	58.2	0.001606	96.7	0
ENSP00000256151	CCDC59	DomCDRP	1.2453	dNdS:VI_>1	0.398095	75.7423	0.00068	66	0.011992	60.5	56.0166
ENSP00000256178	LYVE1	NonDomCDRP	0.344	dNdS:IV_(0.3,0.5]	0.595091	83.9903	4.22e-07	84	0.004632	83.5	16.4596
ENSP00000256186	MICALCL	NonDomCDRP	1.7887	dNdS:VI_>1	2.04689	98.6398	5.42e-16	97.4			76.1151
ENSP00000256190	SBF2	NoCDRP	noHomolog	dNdS:VIIII_noHomolog	-2.84191	0.682989	0.380054	33.3	0.030176	39.7	8.97783
ENSP00000256196	RRAS2	NoCDRP	0.0597	dNdS:II_(0,0.15]	-0.0955	42.3858	0.674254	25.4	0.072094	23.4	10.7843
ENSP00000256257	RNF122	NoCDRP	noVariation	dNdS:VII_0_0	-0.08704	43.0341	0.076386	44.7	0.023707	44.8	0
ENSP00000256261	DUSP26	NoCDRP	noVariation	dNdS:VII_0_0	-0.28866	30.1673	0.003915	59.2	0.017312	51.8	4.2654
ENSP00000256319		NoCDRP	noVariation	dNdS:VII_0_0							1.42857
ENSP00000256343	CATSPERB	NoCDRP	0.6867	dNdS:V_(0.5,1]	-1.37542	4.10951	4.26e-13	95.6	0.008413	69.5	0.358423
ENSP00000256362	VRTN	NonDomCDRP	noHomolog	dNdS:VIIII_noHomolog	-0.24606	32.6909	0.858358	19.6	0.115436	16.5	14.1026
ENSP00000256366	SYNJ2BP	NoCDRP	0.5373	dNdS:V_(0.5,1]	0.238468	66.7535	0.503945	29.8	0.030516	39.5	3.44828
ENSP00000256367	TTC9	NonDomCDRP	1	dNdS:V_(0.5,1]	0.03956	52.5323	0.058557	46.1	0.039976	34.2	37.3874
ENSP00000256383	EIF2S1	NonDomCDRP	noVariation	dNdS:VII_0_0	0.185946	63.5701	0.916802	16.9	0.218327	8.7	13.3333
ENSP00000256389	ADAM20	NoCDRP	1.2051	dNdS:VI_>1	-0.15219	38.5426	1.8e-09	90.6			4.76804
ENSP00000256398	ELP3	NoCDRP	0.0732	dNdS:II_(0,0.15]	-0.83911	10.7831	3.93e-07	84.1	0.014227	56.5	1.27971
ENSP00000256404	PEBP4	NonDomCDRP	0.4557	dNdS:IV_(0.3,0.5]	1.54263	97.187	0.038899	48.5	0.005069	81.8	18.5022
ENSP00000256412	ADAMDEC1	NoCDRP	0.1744	dNdS:III_(0.15,0.3]	0.397288	75.7018	1.76e-09	90.7	0.004153	85.6	13.8298
ENSP00000256429	MBD2	D_nonD_CDRP	0.8298	dNdS:V_(0.5,1]	-0.40216	24.2866	0.98931	10.1	0.245815	6.2	76.399
ENSP00000256433	IER3IP1	NoCDRP	noVariation	dNdS:VII_0_0	0.001088	49.5514	0.018435	52.1	0.01435	56.2	0
ENSP00000256441	MRPS36	DomCDRP	noVariation	dNdS:VII_0_0	-0.05143	45.6561	0.746559	23.2	0.196057	10.8	91.2621
ENSP00000256442	CCNB1	D_nonD_CDRP	200	dNdS:VI_>1	-0.03149	47.2189	0.023969	50.7	0.029214	40.3	30.7159
ENSP00000256443	CDK7	NoCDRP	noVariation	dNdS:VII_0_0	-0.32618	27.9678	0.001619	62.8	0.010871	63.3	4.91329
ENSP00000256447	CD180	NoCDRP	0.2606	dNdS:III_(0.15,0.3]	0.426496	77.1893	1.35e-05	77.3	0.004878	82.5	0
ENSP00000256458	IRAK2	NonDomCDRP	0.4709	dNdS:IV_(0.3,0.5]	1.21084	95.1323	2.9e-08	87.7	0.003376	89.3	23.04
ENSP00000256460	CAMK1	NoCDRP	0.2143	dNdS:III_(0.15,0.3]	-0.26695	31.4638	0.004747	58.4	0.009279	67	6.48649
ENSP00000256474	VHL	NonDomCDRP	0.476	dNdS:IV_(0.3,0.5]	-0.26056	31.8284	0.033735	49.1	0.033205	37.7	40.8451
ENSP00000256495	BHLHE40	NonDomCDRP	noVariation	dNdS:VII_0_0	-0.28292	30.5088	0.941607	15.5	0.306698	2.7	41.2621
ENSP00000256496	ARL8B	NoCDRP	noVariation	dNdS:VII_0_0	0.100542	57.2495	0.622357	26.9	0.04905	30.4	0
ENSP00000256497	EDEM1	NonDomCDRP	0.089	dNdS:II_(0,0.15]	-0.59326	16.9184	5.6e-11	93.3	0.008472	69.4	15.6773
ENSP00000256509	CHL1	NonDomCDRP	0.1284	dNdS:II_(0,0.15]	-0.6564	15.1647	2.05e-06	81.3	0.016465	53	20.2614
ENSP00000256538	DPH6	NoCDRP	0.4935	dNdS:IV_(0.3,0.5]	0.524692	81.4262	0.002469	61.2	0.016794	52.6	0
ENSP00000256544	KATNBL1	NoCDRP	noVariation	dNdS:VII_0_0	-0.05415	45.5172	0.014155	53.5	0.014509	56	23.0263
ENSP00000256545	EMC7	NoCDRP	noVariation	dNdS:VII_0_0	-0.27557	30.9429	0.935652	15.8	0.293523	3.2	15.2893
ENSP00000256578	AMPD2	NonDomCDRP	0.6388	dNdS:V_(0.5,1]	-1.57723	2.92875	0.008542	55.5	0.023201	45.3	21.1604
ENSP00000256585	REG4	NoCDRP	200	dNdS:VI_>1	0.58185	83.5562	5.62e-05	73.6	0.013766	57.4	0
ENSP00000256594	GSTM3	NoCDRP	0.1462	dNdS:II_(0,0.15]	0.16535	62.1752	0.000573	66.6	0.011448	61.7	0
ENSP00000256637	SORT1	NoCDRP	0.2025	dNdS:III_(0.15,0.3]	0.082162	55.8778	0.999927	3.5	0.239164	6.8	6.49819
ENSP00000256646	NOTCH2	D_nonD_CDRP	noHomolog	dNdS:VIIII_noHomolog	-1.96695	1.72484	1	0.7	0.122703	15.6	20.3561
ENSP00000256649	TRIM45	NoCDRP	0.6667	dNdS:V_(0.5,1]	0.703156	86.9595	1.45e-06	82			3.10345
ENSP00000256682	ARF3	NoCDRP	noHomolog	dNdS:VIIII_noHomolog	0.024554	51.4152	0.622731	26.8	0.074832	23	0
ENSP00000256689	SLC38A2	NoCDRP	0.5	dNdS:IV_(0.3,0.5]	-0.23407	33.4375	0.969357	13.1	0.080956	21.8	0
ENSP00000256707	KIDINS220	NonDomCDRP	0.1341	dNdS:II_(0,0.15]	-1.98779	1.67853	0.029045	49.8	0.027896	41.3	30.4348
ENSP00000256722		NoCDRP	0.0966	dNdS:II_(0,0.15]					0.004465	84.2	9.35412
ENSP00000256737	ANO3	NoCDRP	noVariation	dNdS:VII_0_0	-1.54816	3.10239	4.09e-13	95.6	0.012334	59.9	4.07747
ENSP00000256759	FST	NoCDRP	noVariation	dNdS:VII_0_0	-0.14515	39.0403	0.963797	13.6	0.202219	10.2	4.36047
ENSP00000256785	CFHR5	NoCDRP	0.463	dNdS:IV_(0.3,0.5]	0.761422	88.3371	9.57e-22	99			2.28471
ENSP00000256797	ERN2	NoCDRP	0.4322	dNdS:IV_(0.3,0.5]	0.267326	68.4841	1.79e-15	97.2	0.004446	84.2	14.1469
ENSP00000256854	NARS	NoCDRP	0.1401	dNdS:II_(0,0.15]	-0.93666	8.92516	3.48e-07	84.3	0.013703	57.5	9.67153
ENSP00000256857	GRP	NonDomCDRP	200	dNdS:VI_>1	0.448558	78.2891	2.14e-06	81.2	0.005092	81.7	62.1622
ENSP00000256858	KIAA1468	NonDomCDRP	0.1871	dNdS:III_(0.15,0.3]	-0.45055	22.2434	1	1.5	0.196296	10.8	23.2
ENSP00000256897	CCNH	NoCDRP	0.1803	dNdS:III_(0.15,0.3]	0.822104	89.5815	0.00473	58.4	0.004034	86.1	3.40557
ENSP00000256906	HRH4	NoCDRP	0.5909	dNdS:V_(0.5,1]	0.036036	52.3065	1.67e-07	85.5	0.003235	89.9	0
ENSP00000256925	CABLES1	NonDomCDRP	0.5814	dNdS:V_(0.5,1]	0.271499	68.7735	0.445044	31.6	0.036137	36.1	35.861
ENSP00000256935	DOCK2	NonDomCDRP	0.1132	dNdS:II_(0,0.15]	-1.0645	7.00932	1	1.1	0.108047	17.4	6.99454
ENSP00000256951	EMP1	NoCDRP	200	dNdS:VI_>1	0.527415	81.5304	0.411004	32.5	0.050321	29.8	0
ENSP00000256958	SLCO1B1	NoCDRP	0.7857	dNdS:V_(0.5,1]	0.468797	79.2672	3.45e-16	97.5			2.31548
ENSP00000256969		NoCDRP	200	dNdS:VI_>1							18.9655
ENSP00000256993	MYBPC3	NonDomCDRP	0.1333	dNdS:II_(0,0.15]	0.128595	59.3158	1.35e-06	82.1	0.01393	57	19.6232
ENSP00000256996	DDB2	NonDomCDRP	noVariation	dNdS:VII_0_0	-0.4424	22.6081	0.005118	58	0.013201	58.3	9.60187
ENSP00000256997	ACP2	NoCDRP	0.2771	dNdS:III_(0.15,0.3]	-0.36258	26.2256	0.000526	66.9	0.010812	63.4	7.80142
ENSP00000256999	FOLH1	NoCDRP	0.1727	dNdS:III_(0.15,0.3]	-0.42437	23.3721	0.253397	37	0.033149	37.8	0.8
ENSP00000257013		NoCDRP	noVariation	dNdS:VII_0_0							0
ENSP00000257017	RAB33A	NoCDRP	0.9342	dNdS:V_(0.5,1]	-0.02797	47.433	0.713538	24.2	0.206371	9.8	1.68776
ENSP00000257068	MTNR1B	NoCDRP	0.4398	dNdS:IV_(0.3,0.5]	0.205885	64.7219	0.008703	55.5	0.025397	43.3	0.276243
ENSP00000257118	PHC2	D_nonD_CDRP	0.1196	dNdS:II_(0,0.15]	-0.6541	15.2457	0.205656	38.6	0.031531	38.8	66.4336
ENSP00000257177	ZCCHC11	D_nonD_CDRP	0.3284	dNdS:IV_(0.3,0.5]	-1.82	2.14158	1	0.6	0.374774	1.3	38.6018
ENSP00000257181	PRPF38A	D_nonD_CDRP	noVariation	dNdS:VII_0_0	-0.40967	23.9625	0.996468	7.8	0.182636	11.9	42.6282
ENSP00000257189	DSG3	NoCDRP	0.2406	dNdS:III_(0.15,0.3]	-0.24208	32.9108	3.36e-13	95.7	0.007686	72	10.4104
ENSP00000257192	DSG1	NonDomCDRP	0.5255	dNdS:V_(0.5,1]	0.633226	85.1363	0.979103	11.9	0.081364	21.7	24.8808
ENSP00000257198	DSC1	NoCDRP	0.5347	dNdS:V_(0.5,1]	0.598423	84.0597	4.39e-08	87.2	0.011984	60.5	11.5213
ENSP00000257215	DAGLA	NonDomCDRP	0.1782	dNdS:III_(0.15,0.3]	-1.94117	1.78851	0.953148	14.5	0.070112	23.9	22.4568
ENSP00000257248	GIF	NoCDRP	0.7627	dNdS:V_(0.5,1]	0.445983	78.1617	0.434202	31.8	0.004004	86.3	5.9952
ENSP00000257262	TMEM258	NoCDRP	noVariation	dNdS:VII_0_0	0.107088	57.7184	0.000865	65.3	0.008582	69.1	0
ENSP00000257264	TCN1	NoCDRP	0.9384	dNdS:V_(0.5,1]	0.844763	90.114	3.86e-16	97.5	0.002489	93	0.692841
ENSP00000257287	CEP135	NonDomCDRP	0.3108	dNdS:IV_(0.3,0.5]	-0.22612	33.9584	4.85e-17	97.8	0.005375	80.6	25.8772
ENSP00000257290	PDGFRA	NonDomCDRP	0.1467	dNdS:II_(0,0.15]	-0.66146	14.9968	0.999877	4	0.113491	16.7	9.55005
ENSP00000257312	DZIP1	NonDomCDRP	0.4608	dNdS:IV_(0.3,0.5]	-0.40826	24.0146	3.33e-12	94.8	0.008037	70.7	43.8293
ENSP00000257336	BIVM	NonDomCDRP	noHomolog	dNdS:VIIII_noHomolog	-0.50897	19.8356	6.43e-06	79.1	0.00725	73.5	27.0378
ENSP00000257347	CARS2	NoCDRP	noHomolog	dNdS:VIIII_noHomolog	0.793196	89.0606	0.040465	48.2	0.020796	47.8	6.20567
ENSP00000257359	ADAMTS8	NonDomCDRP	0.2733	dNdS:III_(0.15,0.3]	-0.04906	45.8992	1.06e-08	88.9	0.009082	67.5	11.811
ENSP00000257408	KLB	NoCDRP	0.2057	dNdS:III_(0.15,0.3]	0.475499	79.5335	0.094473	43.5	0.028735	40.7	0.287356
ENSP00000257414	SEMA6A	NonDomCDRP	0.163	dNdS:III_(0.15,0.3]	-1.16803	5.92117	0.999547	5.1	0.195126	10.9	35.3391
ENSP00000257497	ANXA1	NoCDRP	noVariation	dNdS:VII_0_0	-0.10939	41.5118	0.000442	67.4	0.003224	89.9	6.06936
ENSP00000257548	USP30	DomCDRP	noVariation	dNdS:VII_0_0	-0.37008	25.8726	0.309014	35.5	0.022016	46.5	16.0542
ENSP00000257549	SDS	NoCDRP	0.4255	dNdS:IV_(0.3,0.5]	-0.35045	26.7639	0.005484	57.7	0.008994	67.8	0.914634
ENSP00000257552	MSI1	NoCDRP	0.2121	dNdS:III_(0.15,0.3]	-0.17611	36.9914	0.997146	7.4	0.258488	5.3	20.9945
ENSP00000257566	TBX3	DomCDRP	0.0745	dNdS:II_(0,0.15]	-0.50242	20.0671	0.948925	14.8	0.100388	18.6	32.9744
ENSP00000257570	OASL	NoCDRP	3.32	dNdS:VI_>1	0.11872	58.6618	5.07e-12	94.7	0.002064	94.9	0
ENSP00000257572		NoCDRP	noVariation	dNdS:VII_0_0							7.69231
ENSP00000257600	DTX1	NonDomCDRP	0.113	dNdS:II_(0,0.15]	-1.18156	5.78225	0.001256	63.8	0.021708	46.8	32.7419
ENSP00000257604	TRAFD1	NonDomCDRP	3.65	dNdS:VI_>1	-0.21524	34.5778	1.83e-05	76.5	0.013588	57.7	53.0928
ENSP00000257626	GSAP	NoCDRP	0.2586	dNdS:III_(0.15,0.3]	-0.17662	36.9567	3.6e-16	97.5			0.117096
ENSP00000257627	OCM2	NoCDRP	noVariation	dNdS:VII_0_0	0.571479	83.1452	0.080069	44.5	0.00066	99.6	28.4404
ENSP00000257632	UPK3B	NonDomCDRP	2.3521	dNdS:VI_>1	1.12512	94.2583	0.000192	69.9	0.004231	85.3	35.9375
ENSP00000257663	TMEM60	NoCDRP	noVariation	dNdS:VII_0_0	0.267524	68.5188	0.661432	25.7	0.203831	10.1	0
ENSP00000257694	PNPLA8	NonDomCDRP	0.2237	dNdS:III_(0.15,0.3]	-0.40649	24.0898	0.008132	55.8	0.038411	35	13.1714
ENSP00000257696	HILPDA	NoCDRP	noVariation	dNdS:VII_0_0	0.356606	73.786	0.422105	32.2	0.108123	17.4	44.4444
ENSP00000257700	RINT1	NoCDRP	0.75	dNdS:V_(0.5,1]	-0.36052	26.3009	1.93e-06	81.4	0.010379	64.4	3.15657
ENSP00000257724		D_nonD_CDRP	0.1698	dNdS:III_(0.15,0.3]							65.6338
ENSP00000257745	KMT2E	NonDomCDRP	0.1207	dNdS:II_(0,0.15]	-3.27193	0.468831	1	0.7	0.547772	0.1	77.1259
ENSP00000257749	BACH2	NonDomCDRP	0.1327	dNdS:II_(0,0.15]	-0.3511	26.7118	0.87404	18.9	0.140685	14.3	42.6873
ENSP00000257770	NT5E	NoCDRP	0.1026	dNdS:II_(0,0.15]	0.489239	80.066	2.34e-06	81	0.0063	77.1	1.0453
ENSP00000257776	MRAP2	NoCDRP	0.0734	dNdS:II_(0,0.15]	-0.15265	38.5252	0.000349	68.2	0.003332	89.5	16.5854
ENSP00000257787	AKIRIN2	NoCDRP	noVariation	dNdS:VII_0_0	0.236555	66.603	0.975341	12.4	0.222131	8.4	25.6158
ENSP00000257789	ORC3	NoCDRP	1.1538	dNdS:VI_>1	0.024051	51.3805	0.00031	68.5	0.005366	80.6	2.66854
ENSP00000257818	LMO2	NonDomCDRP	0.4695	dNdS:IV_(0.3,0.5]	-0.06548	44.7242	0.753952	23	0.267428	4.6	38.7665
ENSP00000257829	NAT10	NonDomCDRP	0.2454	dNdS:III_(0.15,0.3]	-0.19611	35.718	1.05e-13	96.1	0.004743	83	7.5122
ENSP00000257836	PRRG4	NoCDRP	0.7321	dNdS:V_(0.5,1]	0.444879	78.0923	0.181402	39.3	0.018788	50.1	7.52212
ENSP00000257860	PRPH	NoCDRP	noVariation	dNdS:VII_0_0	-0.62151	16.1486	5.05e-10	91.7			22.766
ENSP00000257861	AVIL	NoCDRP	0.5851	dNdS:V_(0.5,1]	0.632108	85.1074	1.03e-10	92.9	0.003753	87.5	5.25031
ENSP00000257863	AMHR2	NoCDRP	0.2535	dNdS:III_(0.15,0.3]	-0.72369	13.3125	5.93e-07	83.5	0.011964	60.5	13.089
ENSP00000257867	LACRT	NonDomCDRP	0.4872	dNdS:IV_(0.3,0.5]	-0.07858	43.7634	8.88e-05	72.3	0.001596	96.7	52.8986
ENSP00000257868	GDF11	NoCDRP	noVariation	dNdS:VII_0_0	-0.16015	38.0274	0.963838	13.6	0.213638	9.2	11.3022
ENSP00000257894	FAM186B	NonDomCDRP	0.7801	dNdS:V_(0.5,1]	0.860081	90.3687	2.4e-12	94.9	0.005076	81.8	33.7066
ENSP00000257895	RDH5	NoCDRP	noHomolog	dNdS:VIIII_noHomolog	0.027576	51.6293	3.11e-06	80.5	0.005871	78.6	0
ENSP00000257901	KRT85	NoCDRP	0.0294	dNdS:II_(0,0.15]	0.462097	78.9373	0.001109	64.3	0.020828	47.7	0.197239
ENSP00000257904	CDK4	NoCDRP	noVariation	dNdS:VII_0_0	-0.35619	26.515	0.932017	16	0.084487	21.1	6.93069
ENSP00000257905	PPP1R1A	D_nonD_CDRP	0.1574	dNdS:III_(0.15,0.3]	-0.03356	47.0394	0.008576	55.5	0.01263	59.4	0
ENSP00000257910	TSPAN31	NoCDRP	noVariation	dNdS:VII_0_0	-0.22305	34.1321	0.327259	34.9	0.0385	34.9	0
ENSP00000257915	TFCP2	NonDomCDRP	noVariation	dNdS:VII_0_0	-0.46778	21.5373	0.000102	71.8	0.019894	48.8	21.3147
ENSP00000257934	ESPL1	D_nonD_CDRP	0.3061	dNdS:IV_(0.3,0.5]	0.192764	63.9926	1	1.1	0.014946	55.3	13.3491
ENSP00000257940	ZC3H10	NonDomCDRP	0.1818	dNdS:III_(0.15,0.3]	-0.34581	26.9549	0.79202	21.9	0.103045	18.2	52.0737
ENSP00000257951	KRT84	NoCDRP	0.2053	dNdS:III_(0.15,0.3]	1.96513	98.5356	9.43e-07	82.6	0.002178	94.4	1.16667
ENSP00000257974	KRT82	NoCDRP	0.1327	dNdS:II_(0,0.15]	1.57487	97.3607	2.61e-16	97.6			2.53411
ENSP00000257979	MIP	NoCDRP	noVariation	dNdS:VII_0_0	-0.03915	46.6632	0.677915	25.2	0.090619	20.2	4.18251
ENSP00000257981	KCNH3	NonDomCDRP	0.1	dNdS:II_(0,0.15]	-1.04333	7.32187	0.99989	3.8	0.232702	7.3	36.3804
ENSP00000258034	TAAR5	NoCDRP	0.1884	dNdS:III_(0.15,0.3]	0.515425	81.0963	3.46e-07	84.3	0.005562	79.9	0
ENSP00000258042	NMBR	NoCDRP	1.0233	dNdS:VI_>1	0.814749	89.431	0.000742	65.8	0.000919	99	0.769231
ENSP00000258052	SMPD2	NoCDRP	0.4299	dNdS:IV_(0.3,0.5]	-0.74061	12.8726	8.12e-11	93.1	0.00464	83.4	4.72813
ENSP00000258080	HTRA2	NonDomCDRP	0.4167	dNdS:IV_(0.3,0.5]	-0.25386	32.2162	0.002301	61.4	0.017714	51.2	13.3188
ENSP00000258083	PRADC1	NoCDRP	noVariation	dNdS:VII_0_0	0.429872	77.3977	3.31e-07	84.4	0.001483	97.2	0
ENSP00000258091	CCT7	NoCDRP	noVariation	dNdS:VII_0_0	-0.5915	16.9937	0.989845	10	0.137748	14.5	3.68324
ENSP00000258105	MRPL53	NoCDRP	0.5575	dNdS:V_(0.5,1]	0.118418	58.6097	0.222249	37.9	0.034207	37.1	11.6071
ENSP00000258106		NoCDRP	0.3836	dNdS:IV_(0.3,0.5]							38.2759
ENSP00000258111	KCNMB4	NoCDRP	noVariation	dNdS:VII_0_0	-0.04952	45.8239	0.829402	20.7	0.229426	7.7	0
ENSP00000258149	MDM2	NonDomCDRP	0.8261	dNdS:V_(0.5,1]	-0.64977	15.3904	0.995411	8.3	0.029076	40.5	47.6861
ENSP00000258168		NoCDRP	0.4247	dNdS:IV_(0.3,0.5]							3.83912
ENSP00000258169	MPHOSPH6	NoCDRP	0.2489	dNdS:III_(0.15,0.3]	0.400816	75.8812	0.001208	64	0.011235	62.2	21.25
ENSP00000258198	DYNC1LI2	DomCDRP	0.1258	dNdS:II_(0,0.15]	-0.69846	13.955	0.798419	21.7	0.078305	22.2	30.6911
ENSP00000258201	FHOD1	NonDomCDRP	0.254	dNdS:III_(0.15,0.3]	-0.3639	26.1735	9.46e-11	93	0.003968	86.5	42.6976
ENSP00000258214	CCDC102A	D_nonD_CDRP	0.0918	dNdS:II_(0,0.15]	-0.04363	46.3506	9.22e-05	72.1	0.012662	59.3	68.9091
ENSP00000258229		D_nonD_CDRP	0.3047	dNdS:IV_(0.3,0.5]							38.6055
ENSP00000258243	URB2	NoCDRP	0.4514	dNdS:IV_(0.3,0.5]	-0.40673	24.0783	3.34e-11	93.6	0.007975	70.9	0.459318
ENSP00000258281	TAF5L	NoCDRP	noVariation	dNdS:VII_0_0	-0.87567	10.0654	0.98585	10.8	0.284657	3.6	5.09338
ENSP00000258301	STX6	NoCDRP	noVariation	dNdS:VII_0_0	0.107239	57.7647	0.019849	51.8	0.108998	17.3	11.7647
ENSP00000258302	RGS8	NoCDRP	0.4344	dNdS:IV_(0.3,0.5]	-0.13205	39.9491	0.52035	29.4	0.024317	44.3	13.6364
ENSP00000258317	NPL	NoCDRP	0.2931	dNdS:III_(0.15,0.3]	-0.08784	42.9762	4.51e-07	83.9	0.00346	88.8	0.3125
ENSP00000258341	LAMC1	DomCDRP	0.2	dNdS:III_(0.15,0.3]	-0.19007	36.1637	1	1.4	0.161392	13.1	22.4984
ENSP00000258381		NonDomCDRP	noHomolog	dNdS:VIIII_noHomolog					0.005225	81.2	45.4418
ENSP00000258383	MRPL44	NoCDRP	0.3259	dNdS:IV_(0.3,0.5]	0.140121	60.2188	9.28e-06	78.2	0.004028	86.1	6.0241
ENSP00000258385	CHRND	NoCDRP	0.4627	dNdS:IV_(0.3,0.5]	0.574644	83.2378	7.26e-07	83.1	0.00232	93.8	8.31721
ENSP00000258390	DOCK10	NoCDRP	0.1016	dNdS:II_(0,0.15]	-0.77075	12.1723	0.029193	49.8	0.018998	49.8	6.54163
ENSP00000258399	USP37	NonDomCDRP	0.2885	dNdS:III_(0.15,0.3]	-0.19354	35.909	0.998322	6.7	0.11997	15.9	43.5138
ENSP00000258400	HTR2B	NoCDRP	0.1228	dNdS:II_(0,0.15]	0.866317	90.4787	3.66e-09	89.9			1.2474
ENSP00000258403	SLC19A3	NoCDRP	0.7879	dNdS:V_(0.5,1]	0.534258	81.8429	0.001631	62.7	0.016948	52.4	6.04839
ENSP00000258411	WNT10A	DomCDRP	noVariation	dNdS:VII_0_0	0.794959	89.1069	0.010169	54.9	0.001312	97.8	20.3837
ENSP00000258412	TMBIM1	NonDomCDRP	0.0942	dNdS:II_(0,0.15]	-0.14786	38.9014	7.4e-05	72.8	0.007935	71.1	18.6495
ENSP00000258415	CYP27A1	NoCDRP	0.0745	dNdS:II_(0,0.15]	0.649676	85.6051	3.9e-11	93.5	0.003222	89.9	3.57815
ENSP00000258416	EIF4E2	NonDomCDRP	noVariation	dNdS:VII_0_0	-0.11705	40.9678	0.919559	16.7	0.099229	18.8	24.4898
ENSP00000258424	COX5B	NoCDRP	200	dNdS:VI_>1	0.311587	71.1408	0.412577	32.4	0.225346	8.1	31.7829
ENSP00000258428	REV1	D_nonD_CDRP	0.1111	dNdS:II_(0,0.15]	-0.60511	16.6059	0.997024	7.5	0.062898	25.5	35.3317
ENSP00000258436	MFSD9	NoCDRP	0.8552	dNdS:V_(0.5,1]	1.06252	93.5348	7.72e-06	78.7			6.32911
ENSP00000258449	TGFBRAP1	NoCDRP	0.1392	dNdS:II_(0,0.15]	-1.45333	3.6291	0.129423	41.6	0.035952	36.2	2.2093
ENSP00000258455	MRPS9	NoCDRP	0.1412	dNdS:II_(0,0.15]	0.021986	51.2358	3.36e-06	80.3	0.015047	55.1	7.57576
ENSP00000258456	GPR45	NoCDRP	0.0331	dNdS:II_(0,0.15]	-0.7529	12.5195	0.864765	19.3	0.288323	3.4	0
ENSP00000258457	C2orf49	DomCDRP	noVariation	dNdS:VII_0_0	0.273263	68.8603	0.192674	38.9	0.031246	39	70.2586
ENSP00000258484	EPC2	D_nonD_CDRP	0.5556	dNdS:V_(0.5,1]	-0.77813	12.0681	0.999952	3.2	0.387238	1.1	47.8315
ENSP00000258494	ALDH1L2	NoCDRP	0.1163	dNdS:II_(0,0.15]	-0.47578	21.1958	3.5e-11	93.6			4.44204
ENSP00000258499	USP44	NoCDRP	1.0357	dNdS:VI_>1	-0.1739	37.1534	1.46e-09	90.8	0.009063	67.6	5.33708
ENSP00000258526	PLXNC1	NoCDRP	0.0882	dNdS:II_(0,0.15]	-1.46261	3.55386	0.999715	4.6	0.070727	23.7	3.57143
ENSP00000258534	DRAM1	NoCDRP	noVariation	dNdS:VII_0_0	-0.36752	25.9767	0.0807	44.4	0.010195	64.8	0
ENSP00000258538	SLC41A2	NoCDRP	0.0808	dNdS:II_(0,0.15]	-0.58783	17.1558	0.913052	17.1	0.122862	15.6	8.55148
ENSP00000258613	THSD1	NonDomCDRP	0.4196	dNdS:IV_(0.3,0.5]	-0.81822	11.223	2.45e-05	75.7	0.012382	59.8	43.1925
ENSP00000258646	RCBTB1	NoCDRP	noVariation	dNdS:VII_0_0	-0.92165	9.19141	0.000218	69.6	0.011212	62.3	0.564972
ENSP00000258648	MED4	D_nonD_CDRP	noVariation	dNdS:VII_0_0	-0.03819	46.7095	0.06162	45.8	0.007175	73.8	48.8889
ENSP00000258654	COG3	NoCDRP	0.0331	dNdS:II_(0,0.15]	-0.56038	17.9198	0.999143	5.7	0.056785	27.4	6.64251
ENSP00000258662	NUDT15	NoCDRP	noVariation	dNdS:VII_0_0	0.275983	69.0571	0.09723	43.4	0.020371	48.3	14.6341
ENSP00000258704	SPDYE1	NoCDRP	0.843	dNdS:V_(0.5,1]	0.852118	90.2356	0.206336	38.6	0.00685	74.9	8.03571
ENSP00000258729	IGF2BP3	NonDomCDRP	noVariation	dNdS:VII_0_0	-0.70596	13.7813	0.999726	4.6	0.364864	1.5	23.1434
ENSP00000258739	KDELR2	NoCDRP	noVariation	dNdS:VII_0_0	-0.31676	28.4714	0.268729	36.5	0.036896	35.7	0
ENSP00000258772	DDX56	NonDomCDRP	0.1343	dNdS:II_(0,0.15]	-0.28931	30.1152	3.52e-06	80.2	0.008597	69	11.883
ENSP00000258787	MYO1G	NoCDRP	0.2344	dNdS:III_(0.15,0.3]	0.308515	70.973	7.64e-07	83	0.015705	54.1	3.04519
ENSP00000258796	TTYH3	NonDomCDRP	0.1144	dNdS:II_(0,0.15]	-0.31006	28.9402	0.979599	11.8	0.131473	15	14.3403
ENSP00000258821	TTC5	NoCDRP	1.1429	dNdS:VI_>1	-0.10652	41.7086	0.002494	61.1	0.008868	68.2	15
ENSP00000258829		NonDomCDRP	0.5714	dNdS:V_(0.5,1]							53.9749
ENSP00000258873	ACSBG1	NonDomCDRP	0.2296	dNdS:III_(0.15,0.3]	-0.4852	20.7443	0.0067	56.8	0.013773	57.3	8.83978
ENSP00000258884	ABHD17C	NoCDRP	0.4042	dNdS:IV_(0.3,0.5]	-0.23997	33.0497	0.840829	20.2	0.262532	5	12.1581
ENSP00000258886	IREB2	NoCDRP	0.5625	dNdS:V_(0.5,1]	-0.52558	19.17	1	1.3	0.487566	0.3	3.53063
ENSP00000258888	ALPK3	NonDomCDRP	0.6004	dNdS:V_(0.5,1]	0.211763	65.1907	3.54e-09	89.9			69.0089
ENSP00000258930	CIB2	NoCDRP	noVariation	dNdS:VII_0_0	0.006829	50.0203	0.000468	67.2	0.007164	73.8	0
ENSP00000258955	RSAD1	NoCDRP	0.7805	dNdS:V_(0.5,1]	-0.2387	33.1539	5.75e-06	79.3	0.006231	77.3	9.27602
ENSP00000258975	TACO1	NoCDRP	0.149	dNdS:II_(0,0.15]	-0.12168	40.632	0.357586	34	0.051207	29.4	22.2222
ENSP00000258991	TEX2	NonDomCDRP	0.136	dNdS:II_(0,0.15]	-0.61548	16.3281	0.44098	31.7	0.02327	45.2	44.709
ENSP00000259006	LIMD2	NoCDRP	200	dNdS:VI_>1	0.101499	57.3363	0.01763	52.3	0.004583	83.7	10.2362
ENSP00000259008	BRIP1	NoCDRP	0.1748	dNdS:III_(0.15,0.3]	-1.34622	4.34103	5.38e-13	95.5	0.007161	73.8	16.5733
ENSP00000259021	KAT7	NonDomCDRP	noVariation	dNdS:VII_0_0	-0.17883	36.8004	0.999957	3.2	0.408289	0.9	47.7905
ENSP00000259030	RTP4	NoCDRP	0.2803	dNdS:III_(0.15,0.3]	0.704772	87.0116	0.010846	54.6	0.001096	98.5	5.28455
ENSP00000259053	CD302	NoCDRP	noHomolog	dNdS:VIIII_noHomolog	-0.11609	41.043	0.009385	55.2	0.016065	53.5	0
ENSP00000259056	GALNT5	NonDomCDRP	0.7053	dNdS:V_(0.5,1]	-0.39693	24.5587	1.34e-12	95.2	0.002621	92.5	36.5957
ENSP00000259075	TANK	NoCDRP	0.2703	dNdS:III_(0.15,0.3]	0.823061	89.6047	0.943798	15.3	0.102779	18.2	43.2941
ENSP00000259089	BLK	NonDomCDRP	0.3479	dNdS:IV_(0.3,0.5]	-0.04715	46.0439	2.86e-07	84.6	0.004255	85.1	10.495
ENSP00000259119	SKIL	D_nonD_CDRP	0.1858	dNdS:III_(0.15,0.3]	-0.35875	26.3645	0.459268	31.1	0.095048	19.6	32.1637
ENSP00000259154	KCTD3	NonDomCDRP	noVariation	dNdS:VII_0_0	-1.03516	7.41448	0.986866	10.6	0.052778	28.8	29.4479
ENSP00000259199	CBWD2	NonDomCDRP	0.8106	dNdS:V_(0.5,1]	0.39986	75.8291	0.967071	13.3	0.241866	6.6	9.11392
ENSP00000259205	IL36G	NoCDRP	0.2594	dNdS:III_(0.15,0.3]	0.285399	69.6822	2.5e-05	75.7	0.004295	84.9	6.50888
ENSP00000259206	IL1RN	NoCDRP	0.2476	dNdS:III_(0.15,0.3]	-0.34118	27.1864	0.340219	34.5	0.014432	56.1	15
ENSP00000259211	IL36A	NoCDRP	0.1684	dNdS:III_(0.15,0.3]	0.679394	86.3923	0.000123	71.3	0.00438	84.5	1.26582
ENSP00000259213	IL36B	NoCDRP	noHomolog	dNdS:VIIII_noHomolog	0.454295	78.5032	0.003517	59.7	0.001733	96.2	6.70732
ENSP00000259216		NoCDRP	0.329	dNdS:IV_(0.3,0.5]							10.7623
ENSP00000259239	IMP4	NoCDRP	0.2517	dNdS:III_(0.15,0.3]	-0.1038	41.8881	0.000968	64.8	0.011693	61.1	6.18557
ENSP00000259241	HS6ST1	NoCDRP	noVariation	dNdS:VII_0_0	0.330567	72.3679	0.906059	17.5	0.299318	3	6.81265
ENSP00000259253	UGGT1	NoCDRP	0.3182	dNdS:IV_(0.3,0.5]	-1.65381	2.65671	0.002897	60.5	0.031203	39	3.47267
ENSP00000259254	GYPC	NoCDRP	0.529	dNdS:V_(0.5,1]	0.61282	84.5575	0.01387	53.6	0.005456	80.3	42.1875
ENSP00000259324	LRRC8A	NoCDRP	noVariation	dNdS:VII_0_0	-1.34267	4.37576	0.916105	17	0.046312	31.4	1.11111
ENSP00000259335	KIAA0368	NonDomCDRP	0.225	dNdS:III_(0.15,0.3]	-0.14697	38.9304	1	1	0.068513	24.3	14.4274
ENSP00000259339	TOR1B	NoCDRP	0.0935	dNdS:II_(0,0.15]	-0.39738	24.5471	0.743694	23.3	0.296181	3.1	0
ENSP00000259351	RALGPS1	NonDomCDRP	1.125	dNdS:VI_>1	-0.16191	37.8654	0.999857	4.1	0.212687	9.2	20.4668
ENSP00000259357	OR1J1	NoCDRP	noHomolog	dNdS:VIIII_noHomolog	0.536021	81.9182	0.008025	55.9			0.310559
ENSP00000259362	OR13C9	NoCDRP	noHomolog	dNdS:VIIII_noHomolog	1.14108	94.4435	0.043665	47.7	0.008464	69.4	0
ENSP00000259392	SLC31A2	NoCDRP	noVariation	dNdS:VII_0_0	0.49549	80.3091	2.78e-05	75.4	0.002455	93.1	0
ENSP00000259396	ORM1	NoCDRP	noHomolog	dNdS:VIIII_noHomolog	0.744201	87.9667	0.132358	41.5	0.008951	68	8.45771
ENSP00000259407	BAAT	NoCDRP	1.2358	dNdS:VI_>1	-0.05959	45.1583	7.96e-06	78.6	0.007143	73.9	0
ENSP00000259455	GABBR2	NonDomCDRP	0.2291	dNdS:III_(0.15,0.3]	-1.30434	4.67095	0.99979	4.3	0.145735	13.9	15.1966
ENSP00000259457	PSMB7	NoCDRP	0.1607	dNdS:III_(0.15,0.3]	-0.11418	41.1993	0.941262	15.5	0.266501	4.7	1.80505
ENSP00000259466	OR1L4	NoCDRP	0.5754	dNdS:V_(0.5,1]	1.12895	94.3103	0.043165	47.8	0.019033	49.8	0
ENSP00000259467	PDCL	D_nonD_CDRP	1.6842	dNdS:VI_>1	-0.10667	41.6913	0.312028	35.4	0.044522	32.2	31.5615
ENSP00000259469	RPL35	NonDomCDRP	noVariation	dNdS:VII_0_0	0.033014	52.0692	0.527875	29.2	0.065836	24.8	30.0813
ENSP00000259470	CTSV	NoCDRP	200	dNdS:VI_>1	0.284592	69.6301	9.73e-06	78.1	0.004832	82.6	0.299401
ENSP00000259477	ARPC5L	NoCDRP	noVariation	dNdS:VII_0_0	-0.04393	46.3159	0.775599	22.4	0.230198	7.6	17.6471
[truncated: 21,072 more rows]

## Sheet: Table S3A
Table S3A The selected GO term used in the GO enrichment analysis of four categories of proteins (The data used in figure3F)
M: the total number of all human protein-coding genes (PCGs) with GO annotation
N: the number of PCGs with one specific GO term annotation
m: the number of PCGs belonging to one speicfic protein category
n: the number of PCGs with one specific GO term annotation in each protein category
The over- or under-representation analysis is based on hypergeometric distribution model, and the P values were corrected using the Benjamini–Hochberg method. The reuslts are Q values.
Log(Q): Over- or under- representation strengths are represented by -log(Q) or log(Q)
"++++", represents significantly over-represented, P<1E-50
"+++", represents significantly over-represented, P<1E-10
"++", represents significantly over-represented, P<0.05
"+", represents over-represented but not significantly, P>0.05
"––––", represents significantly under–represented, P<1E–50
"–––", represents significantly under–represented, P<1E–10
"––", represents significantly under–represented, P<0.05
"–", represents under–represented but not significantly, P>0.05
Go Term	Go ID	M	N	NoCDRP_m	NoCDRP_n	NoCDRP_dir_BH_adj	NoCDRP_Log(Q)	NonDomCDRP_m	NonDomCDRP_n	NonDomCDRP_dir_BH_adj	NonDomCDRP_Log(Q)	DomCDRP_m	DomCDRP_n	DomCDRP_Q_BH_adj	DomCDRP_Log(Q)	D_nonD_CDRP_m	D_nonD_CDRP_n	D_nonD_CDRP_dir_BH_adj	D_nonD_CDRP_Log(Q)
small molecule metabolic process	GO:0044281	17025	1611	9716	1294	++++	93.5422	5190	260	–––	–42.8082799999999	652	27	––	–6.88385	1467	30	---	-31.9876
organonitrogen compound metabolic process	GO:1901564	17025	4969	9716	3038	+++	11.2519	5190	1454	––	–1.86957	652	164	––	–1.83485	1467	313	---	-11.5381
biosynthetic process	GO:0009058	17025	2300	9716	1417	++	5.33995	5190	626	––	–3.60829	652	77	–	–0.97161	1467	180	-	-0.98531
catabolic process	GO:0009056	17025	1902	9716	1218	++	9.90317	5190	525	––	–2.59199	652	54	––	–2.08786	1467	105	--	-7.02678
phosphorus metabolic process	GO:0006793	17025	1954	9716	1210	++	5.38518	5190	590	–	–0.40392	652	35	––	–6.85656	1467	119	--	-5.06645
developmental process	GO:0032502	17025	4722	9716	2209	––––	–61.7964699999999	5190	1695	+++	20.4404	652	232	++	5.30161	1467	586	+++	25.2872
rhythmic process	GO:0048511	17025	286	9716	119	––	–6.47861	5190	106	++	2.01524	652	20	++	2.01797	1467	41	++	2.77198
reproductive process	GO:0022414	17025	1335	9716	628	–––	–13.36108	5190	482	++	5.27927	652	74	++	3.10475	1467	151	++	3.47396
cellular component organization or biogenesis	GO:0071840	17025	4899	9716	2314	––––	–59.49898	5190	1650	++	8.24637	652	256	++	8.41758	1467	679	+++	49.2555
gene silencing	GO:0016458	17025	157	9716	61	––	–5.21857	5190	56	+	0.90697	652	23	++	6.89031	1467	17	+	0.71077
regulation of myeloid cell differentiation	GO:0045637	17025	257	9716	127	––	–1.81337	5190	80	+	0.36244	652	24	++	3.66211	1467	26	+	0.52833
posttranscriptional regulation of gene expression	GO:0010608	17025	590	9716	302	––	–2.40735999999999	5190	191	+	0.77915	652	39	++	2.56935	1467	58	+	0.67157
protein metabolic process	GO:0019538	17025	3986	9716	2247	–	–0.67273	5190	1294	++	2.36955	652	146	–	–0.54868	1467	299	--	-2.38857
protein modification process	GO:0036211	17025	2844	9716	1454	–––	–11.50497	5190	1069	+++	17.8011	652	80	––	–2.95752	1467	241	-	-0.39837
positive regulation of signaling	GO:0023056	17025	1769	9716	973	––	–1.34577	5190	584	++	1.48454	652	53	–	–1.24977	1467	159	+	0.53595
regulation of cell proliferation	GO:0042127	17025	1597	9716	861	––	–1.7858	5190	523	++	1.37027	652	59	–	–0.38043	1467	154	+	1.0307
regulation of response to stimulus	GO:0048583	17025	4265	9716	2320	––	–4.29014	5190	1426	++	5.47632	652	146	–	–1.10335	1467	373	+	0.42604
regulation of cell death	GO:0010941	17025	1618	9716	859	––	–3.11389	5190	563	++	3.70194	652	51	–	–1.00406	1467	145	+	0.50145
response to endogenous stimulus	GO:0009719	17025	971	9716	531	–	–0.88256	5190	292	–	–0.39559	652	44	+	0.73159	1467	104	++	1.34238
movement of cell or subcellular component	GO:0006928	17025	1388	9716	732	––	–2.81292999999999	5190	447	+	0.98311	652	62	+	0.94629	1467	147	++	2.05594
regulation of hydrolase activity	GO:0051336	17025	1227	9716	637	––	–3.44006999999999	5190	401	+	1.22294	652	50	+	0.46494	1467	139	++	3.07827
response to abiotic stimulus	GO:0009628	17025	1015	9716	534	––	–2.4528	5190	321	+	0.53765	652	43	+	0.57586	1467	117	++	2.59852
viral process	GO:0016032	17025	675	9716	336	––	–3.92405	5190	220	+	0.79198	652	31	+	0.77032	1467	88	++	3.6698

## Sheet: Table S3B
Table S3B The selected EKGG term used in the KEGG enrichment analysis of four categories of proteins (The data used in figure3G)
Name:KEGG term
M: the total number of all human protein-coding genes (PCGs) with KEGG annotation
N: the number of PCGs with one specific KEGG term annotation
m: the number of PCGs belonging to one speicfic protein category
n: the number of PCGs with one specific KEGG annotation in each protein category
The over- or under-representation analysis is based on hypergeometric distribution model, and the P values were corrected using the Benjamini–Hochberg method. The reuslts are Q values.
Log(Q): Over- or under- representation strengths are represented by -log(Q) or log(Q)
"++++", represents significantly over-represented, P<1E-50
"+++", represents significantly over-represented, P<1E-10
"++", represents significantly over-represented, P<0.05
"+", represents over-represented but not significantly, P>0.05
"––––", represents significantly under–represented, P<1E–50
"–––", represents significantly under–represented, P<1E–10
"––", represents significantly under–represented, P<0.05
"–", represents under–represented but not significantly, P>0.05
Name	First class	Second class	M	N	NoCDRP_m	NoCDRP_n	NoCDRP_dir_BH_adj	NoCDRP_Log(Q)	NonDomCDRP_m	NonDomCDRP_n	NonDomCDRP_dir_BH_adj	NonDomCDRP_Log(Q)	DomCDRP_m	DomCDRP_n	DomCDRP_dir_BH_adj	DomCDRP_Log(Q)	D_nonD_CDRP_m	D_nonD_CDRP_n	D_nonD_CDRP_dir_BH_adj	D_nonD_CDRP_Log(Q)
Neuroactive ligand–receptor interaction	Environmental Information Processing	Signaling molecules and interaction	6855	338	4128	266	+++	12.3801	1900	47	––	–9.05371	271	17	+	0.73968	556	8	––	–5.17254
Parkinson disease	Human Diseases	Neurodegenerative disease	6855	236	4128	180	++	6.45069	1900	41	––	–3.64646	271	7	–	–0.55721	556	8	––	–2.50915
Cytokine–cytokine receptor interaction	Environmental Information Processing	Signaling molecules and interaction	6855	293	4128	225	++	8.56706	1900	60	––	–2.51294	271	4	––	–2.09165	556	4	––	–6.30285
Prion diseases	Human Diseases	Neurodegenerative disease	6855	260	4128	183	++	2.87743	1900	49	––	–3.00827	271	12	+	0.47911	556	16	–	–0.720689999999999
Huntington disease	Human Diseases	Neurodegenerative disease	6855	294	4128	204	++	2.66415	1900	59	––	–2.58259	271	10	–	–0.41977	556	21	–	–0.38143
Alzheimer disease	Human Diseases	Neurodegenerative disease	6855	355	4128	238	++	1.81419	1900	77	––	–2.02438	271	14	–	–0.26419	556	26	–	–0.35553
Alcoholism	Human Diseases	Substance dependence	6855	140	4128	75	–	–0.89959	1900	34	–	–0.68382	271	23	++	7.75761	556	8	–	–0.60115
Systemic lupus erythematosus	Human Diseases	Immune disease	6855	84	4128	57	+	1.04045	1900	6	––	–5.38454	271	20	++	9.719	556	1	––	–2.05043
Viral carcinogenesis	Human Diseases	Cancer: overview	6855	180	4128	87	––	–2.84963	1900	51	+	0.34257	271	21	++	4.53262	556	21	+	1.12145
ECM–receptor interaction	Environmental Information Processing	Signaling molecules and interaction	6855	87	4128	33	––	–4.40243	1900	18	–	–1.06928	271	19	++	8.53527	556	17	++	3.16299
Human papillomavirus infection	Human Diseases	Infectious disease: viral	6855	327	4128	170	––	–2.61885999999999	1900	83	–	–0.73612	271	24	++	2.49668	556	50	++	4.56399
MAPK signaling pathway	Environmental Information Processing	Signal transduction	6855	283	4128	144	––	–2.84325	1900	104	++	2.74051	271	8	–	–0.56395	556	27	+	0.6738
Proteoglycans in cancer	Human Diseases	Cancer: overview	6855	201	4128	102	––	–2.14512	1900	75	++	2.16976	271	8	+	0.2643	556	16	–	–0.14722
Human T–cell leukemia virus 1 infection	Human Diseases	Infectious disease: viral	6855	214	4128	109	––	–1.89174	1900	74	++	1.51724	271	8	–	–0.27869	556	23	+	0.8809
Spliceosome	Genetic Information Processing	Transcription	6855	134	4128	43	––	–9.94478	1900	55	++	3.14537	271	6	+	0.35896	556	30	++	6.39062
Endocytosis	Cellular Processes	Transport and catabolism	6855	246	4128	106	––	–7.00552	1900	92	++	3.18444	271	7	–	–0.62744	556	41	++	4.9452
Protein digestion and absorption	Organismal Systems	Digestive system	6855	95	4128	48	––	–1.34415	1900	11	––	–3.6462	271	6	+	0.76216	556	30	++	9.9617
Tight junction	Cellular Processes	Cellular community – eukaryotes	6855	160	4128	81	––	–1.79427999999999	1900	43	–	–0.351869999999999	271	4	–	–0.50395	556	32	++	5.32012

## Sheet: Table S4A
Table S4A The raw data for the over/under-representation analysis of four protein categories among 32 OTCs (organs, tissues or cell types) (related to Figure 4a)
Description of the abbreviations and symbols in the tables of this file:
M: the total number of all human protein-coding genes (PCGs) in OTC expression data
N: the number of PCGs expressed in each OTC
m: the number of PCGs belonging to one speicfic protein category
n: the number of PCGs of one specific protein category expressed in a given OTC
The over- or under-representation analysis is based on hypergeometric distribution model, and the P values were corrected using the Benjamini–Hochberg method. The reuslts are Q values.
Log(Q): Over- or under- representation strengths are represented by -log(Q) or log(Q)
T_grade: represent the strength for its consistence with the general over- or underrepresentation trends of most OTCs
OTCs	M	N	T_grade	D_nonD_CDRP_m	D_nonD_CDRP_n	D_nonD_CDRP_Log(Q)	DomCDRP_m	DomCDRP_n	DomCDRP_Log(Q)	NoCDRP_m	NoCDRP_n	NoCDRP_Log(Q)	NonDomCDRP_m	NonDomCDRP_n	NonDomCDRP_Log(Q)
cerebral cortex	21389	17718	36.69	1996	1787	17.1163	959	751	-3.80516	11651	9163	-70.3014	6783	6017	55.5371
skeletal muscle tissue	21389	15958	34.1	1996	1661	20.3056	959	667	-3.70812	11651	8145	-66.011	6783	5485	46.3889
thyroid gland	21389	17778	31.64	1996	1791	17.124	959	746	-4.85086	11651	9243	-58.3838	6783	5998	46.2053
pancreas	21389	15426	30.32	1996	1620	20.6334	959	628	-5.23958	11651	7884	-55.98	6783	5294	39.4389
heart	21389	17211	28.41	1996	1746	16.9931	959	715	-5.22349	11651	8937	-51.5484	6783	5813	39.8616
adrenal gland	21389	17257	27.51	1996	1751	17.1938	959	728	-3.84836	11651	8964	-51.6006	6783	5814	37.4169
placenta	21389	17921	27.3	1996	1803	17.1127	959	764	-3.45166	11651	9355	-51.5432	6783	5999	37.1114
zone of skin	21389	17694	26.67	1996	1765	12.728	959	757	-2.94571	11651	9223	-51.1658	6783	5949	39.8339
kidney	21389	17640	26.46	1996	1773	15.4052	959	740	-4.75567	11651	9204	-48.1202	6783	5923	37.5652
prostate gland	21389	18020	24.55	1996	1786	11.6473	959	766	-3.8077	11651	9440	-45.3196	6783	6028	37.4304
fallopian tube	21389	18622	24.33	1996	1833	11.6229	959	776	-6.89252	11651	9817	-40.7049	6783	6196	38.1172
ovary	21389	17423	23.69	1996	1760	16.3679	959	738	-3.65612	11651	9096	-43.8639	6783	5829	30.8695
endometrium	21389	18454	23.5	1996	1831	14.2646	959	780	-4.84958	11651	9713	-41.6555	6783	6130	33.2369
saliva	21389	17200	23.47	1996	1731	13.9271	959	716	-5.00519	11651	8976	-41.7737	6783	5777	33.1936
smooth muscle tissue	21389	17917	22.66	1996	1790	14.3282	959	755	-4.60888	11651	9401	-40.5031	6783	5971	31.1954
adipose tissue	21389	18239	22.45	1996	1810	13.1764	959	771	-4.61668	11651	9593	-39.9887	6783	6065	32.0095
testis	21389	20305	21.89	1996	1961	14.5885	959	909	-0.35826	11651	10839	-44.9504	6783	6596	27.6702
esophagus	21389	17608	21.54	1996	1744	10.0673	959	738	-4.79801	11651	9232	-38.0246	6783	5894	33.2876
urinary bladder	21389	17258	20.63	1996	1721	11.0759	959	714	-5.6794	11651	9043	-35.2138	6783	5780	30.5587
duodenum	21389	17033	19.12	1996	1694	9.65181	959	691	-7.21983	11651	8940	-30.4072	6783	5708	29.221
gall bladder	21389	18042	18.73	1996	1785	11.1424	959	751	-6.06194	11651	9521	-30.7965	6783	5985	26.9067
lung	21389	18346	18.61	1996	1804	10.1169	959	767	-6.03565	11651	9700	-30.5308	6783	6075	27.757
lymph node	21389	18372	18.14	1996	1809	10.6984	959	766	-6.36261	11651	9722	-29.2219	6783	6075	26.2733
small intestine	21389	18127	18.13	1996	1794	11.5885	959	745	-7.48645	11651	9586	-27.9099	6783	6002	25.5221
liver	21389	16364	17.99	1996	1648	11.2923	959	667	-6.03663	11651	8562	-29.6802	6783	5487	24.9592
stomach	21389	18006	17.9	1996	1764	7.83013	959	763	-4.09602	11651	9497	-31.3696	6783	5982	28.3133
spleen	21389	18191	16.82	1996	1792	10.1793	959	763	-5.3672	11651	9624	-27.7813	6783	6012	23.9567
vermiform appendix	21389	17822	16.16	1996	1758	9.43213	959	729	-7.20748	11651	9430	-24.2916	6783	5905	23.7007
rectum	21389	18605	14.72	1996	1825	10.1917	959	773	-7.17828	11651	9899	-21.5881	6783	6108	19.9124
bone marrow	21389	17494	14.43	1996	1724	8.24409	959	735	-4.47253	11651	9242	-24.2084	6783	5793	20.7966
colon	21389	19042	13.96	1996	1853	8.90244	959	800	-6.61352	11651	10159	-20.6652	6783	6230	19.6761
tonsil	21389	18072	13.88	1996	1765	7.09196	959	745	-7.26792	11651	9600	-20.1144	6783	5962	21.0419

## Sheet: Table S4B
Table S4B The raw data for the over/under-representation analysis of three expression patterns among four protein categories (related to Figure 4b)
Description of the abbreviations and symbols in the tables of this file:
M: the total number of protein-coding genes (PCGs) in the expression data
N: the numbers of PCGs in one speicfic protein category
m:the numbers of PCGs belonging to one speicfic expression pattern
n: the numbers of PCGs of one protein category expressed in one specific expression pattern
All: expressed in all OTCs
More:expressed in more than half of OTCs
Less: expressed in less than half of OTCs
The over- or under-representation analysis is based on hypergeometric distribution model, and the P values were corrected using the Benjamini–Hochberg method. The reuslts are Q values.
Log(Q): Over- or under- representation strengths are represented by -log(Q) or log(Q)
"++++", represents significantly over-represented, P<1E-50
"+++", represents significantly over-represented, P<1E-10
"++", represents significantly over-represented, P<0.05
"+", represents over-represented but not significantly, P>0.05
"––––", represents significantly under–represented, P<1E–50
"–––", represents significantly under–represented, P<1E–10
"––", represents significantly under–represented, P<0.05
"–", represents under–represented but not significantly, P>0.05
Protein category	M	N	All_m	All_n	All_Percentage	All_dir_BH_adj	All_Log(Q)	Less_m	Less_n	Less_Percentage	Less_dir_BH_adj	Less_Log(Q)	More_m	More_n	More_Percentage	More_dir_BH_adj	More_Log(Q)
NoCDRPs	22561	12671	13276	6707	52.9319	––––	–92.3175699999999	4557	3222	25.4281	++++	110.88	4728	2742	21.64	++	2.04669
DomCDRPs	22561	977	13276	532	54.4524	––	–2.60385	4557	228	23.3367	++	2.11328	4728	217	22.2108	+	0.76397
NonDomCDRPs	22561	6902	13276	4640	67.2269	++++	64.8553	4557	894	12.9528	––––	–76.19788	4728	1368	19.8203	––	–2.25841
D_nonD_CDRPs	22561	2011	13276	1397	69.4679	+++	24.2333	4557	213	10.5917	–––	–32.61535	4728	401	19.9403	–	–0.77501

## Sheet: Table S4C
Table S4C The raw data for the distribution of the specifically expressed proteins (related to Figure 4c)
Description of the abbreviations and symbols in the tables of this file:
M: the total number of all expressed specifically human protein-coding genes (PCGs)
N: the number of specifically expressed PCGs in each OTC
m: the number of specifically expressed PCGs belonging to one speicfic protein category
n: the number of specifically expressed PCGs of one specific protein category in a given OTC
percentage: n/m*100
The over- or under-representation analysis is based on hypergeometric distribution model, and the P values were corrected using the Benjamini–Hochberg method. The reuslts are Q values.
Log(Q): Over- or under- representation strengths are represented by -log(Q) or log(Q)
"++++", represents significantly over-represented, P<1E-50
"+++", represents significantly over-represented, P<1E-10
"++", represents significantly over-represented, P<0.05
"+", represents over-represented but not significantly, P>0.05
"––––", represents significantly under–represented, P<1E–50
"–––", represents significantly under–represented, P<1E–10
"––", represents significantly under–represented, P<0.05
"–", represents under–represented but not significantly, P>0.05
OTC name	M	N	NoCDRP_m	NoCDRP_n	NoCDRP_dir_BH_adj	NoCDRP_Log(Q)	NoCDRP_percentage	NonDomCDRP_m	NonDomCDRP_n	NonDomCDRP_dir_BH_adj	NonDomCDRP_Log(Q)	NonDomCDRP_percentage	D_nonD_CDRP_m	D_nonD_CDRP_n	D_nonD_CDRP_dir_BH_adj	D_nonD_CDRP_Log(Q)	D_nonD_CDRP_percentage	DomCDRP_m	DomCDRP_n	DomCDRP_dir_BH_adj	DomCDRP_Log(Q)	DomCDRP_percentage
adipose_tissue	3385	605	2202	370	–	–1.21047	16.8029	775	151	+	0.6947	19.4839	198	42	+	0.78707	21.2121	210	42	+	0.64219	20
adrenal_gland	3385	359	2202	213	––	–1.39907	9.67302	775	97	+	1.21939	12.5161	198	29	+	1.25714	14.6465	210	20	–	–0.45685	9.52381
bone_marrow	3385	731	2202	484	+	0.61462	21.98	775	158	–	–0.42153	20.3871	198	38	–	–0.52065	19.1919	210	51	+	0.12974	24.2857
cerebral_cortex	3385	679	2202	377	––	–7.94712	17.1208	775	215	++	8.06369	27.7419	198	53	++	1.81774	26.7677	210	34	–	–1.06997	16.1905
colon	3385	1145	2202	769	+	1.14881	34.9228	775	250	–	–0.67945	32.2581	198	71	+	0.53625	35.8586	210	55	––	–1.45725	26.1905
duodenum	3385	366	2202	274	++	4.2756	12.4432	775	66	––	–1.87078	8.51613	198	17	–	–0.74662	8.58586	210	9	––	–3.06795	4.28571
endometrium	3385	745	2202	464	–	–1.09365	21.0718	775	194	++	1.30529	25.0323	198	46	+	0.44106	23.2323	210	41	–	–0.55298	19.5238
esophagus	3385	455	2202	297	+	0.19395	13.4877	775	107	+	0.11092	13.8065	198	23	–	0	11.6162	210	28	–	–0.27444	13.3333
fallopian_tube	3385	859	2202	525	––	–2.21923	23.842	775	241	++	4.01179	31.0968	198	54	+	0.539	27.2727	210	39	––	–1.86161	18.5714
gall_bladder	3385	522	2202	353	+	0.40674	16.0309	775	118	–	–0.33996	15.2258	198	24	–	–0.6644	12.1212	210	27	–	–0.65007	12.8571
heart	3385	306	2202	184	–	–1.16197	8.35604	775	86	+	1.21802	11.0968	198	17	–	–0.20141	8.58586	210	19	+	0.27078	9.04762
kidney	3385	513	2202	327	–	–0.27513	14.8501	775	127	+	0.21875	16.3871	198	29	–	–0.33063	14.6465	210	30	–	–0.26922	14.2857
liver	3385	339	2202	249	++	2.9011	11.3079	775	60	––	–1.76397	7.74194	198	15	–	–0.84073	7.57576	210	15	–	–0.918	7.14286
lung	3385	692	2202	459	+	0.51656	20.8447	775	163	+	0.47059	21.0323	198	34	–	–0.55884	17.1717	210	36	–	–0.29459	17.1429
lymph_node	3385	801	2202	547	++	1.51868	24.8411	775	174	–	–0.58184	22.4516	198	44	–	–0.45999	22.2222	210	36	––	–1.33405	17.1429
ovary	3385	372	2202	227	–	–0.71528	10.3088	775	88	+	0.42353	11.3548	198	27	+	0.74648	13.6364	210	30	+	0.82256	14.2857
pancreas	3385	182	2202	112	–	–0.4612	5.08629	775	50	+	0.49648	6.45161	198	12	+	0.42508	6.06061	210	8	–	–0.59351	3.80952
placenta	3385	671	2202	411	––	–1.61174	18.6649	775	165	+	0.75275	21.2903	198	56	++	2.09754	28.2828	210	39	–	–0.44737	18.5714
prostate_gland	3385	541	2202	319	––	–2.5061	14.4868	775	149	++	2.17199	19.2258	198	35	+	0.55345	17.6768	210	38	+	0.53347	18.0952
rectum	3385	872	2202	590	+	1.18108	26.7938	775	192	–	–0.47251	24.7742	198	55	+	0.55809	27.7778	210	35	––	–2.48157	16.6667
saliva	3385	359	2202	230	–	–0.31917	10.445	775	87	+	0	11.2258	198	18	–	–0.24832	9.09091	210	24	+	0.42155	11.4286
skeletal_muscle_tissue	3385	278	2202	157	––	–2.30589	7.12988	775	84	++	2.40477	10.8387	198	16	–	–0.26885	8.08081	210	21	+	0.58159	10
small_intestine	3385	615	2202	438	++	3.39518	19.891	775	128	–	–0.89695	16.5161	198	36	+	0.27675	18.1818	210	13	––	–6.09474	6.19048
smooth_muscle_tissue	3385	462	2202	288	–	–0.68413	13.079	775	114	+	0.6238	14.7097	198	36	+	0.80836	18.1818	210	24	–	–0.70918	11.4286
spleen	3385	758	2202	509	+	0.43867	23.1153	775	164	–	–0.4256	21.1613	198	43	–	–0.34964	21.7172	210	42	–	–0.53007	20
stomach	3385	610	2202	415	+	1.01745	18.8465	775	134	–	–0.4083	17.2903	198	23	––	–1.50443	11.6162	210	38	+	0.28528	18.0952
testis	3385	2436	2202	1491	–––	–13.24233	67.7112	775	609	++	5.78452	78.5806	198	172	++	6.3621	86.8687	210	164	++	1.6392	78.0952
thyroid_gland	3385	487	2202	283	––	–2.84985	12.852	775	137	++	2.37867	17.6774	198	39	++	1.5463	19.697	210	28	–	–0.43045	13.3333
tonsil	3385	758	2202	549	++	5.6174	24.9319	775	137	––	–3.49951	17.6774	198	36	–	–1.08603	18.1818	210	36	––	–1.35255	17.1429
urinary_bladder	3385	336	2202	241	++	1.82827	10.9446	775	68	–	–0.90757	8.77419	198	14	–	–0.87655	7.07071	210	13	–	–1.16396	6.19048
vermiform_appendix	3385	530	2202	389	++	4.68779	17.6658	775	102	––	–1.67501	13.1613	198	23	–	–1.21127	11.6162	210	16	––	–3.26238	7.61905
zone_of_skin	3385	628	2202	392	–	–0.55863	17.802	775	157	+	0.73947	20.2581	198	40	+	0.40266	20.202	210	39	+	0.27826	18.5714

## Sheet: Table S4D
Table S4D The raw data for the over/under-representation analysis of the specifically expressed DomCDRPs in the developmental organs
The specifically expressed stages are marked in yellow
Description of the abbreviations and symbols in the tables of this file:
M: the total number of all specifically expressed human protein-coding genes (PCGs)
N: the number of specifically expressed PCGs in each developmental stage
m: the number of specifically expressed PCGs belonging to one speicfic protein category
n: the number of specifically expressed PCGs of one specific protein category in a development stage
The over- or under-representation analysis is based on hypergeometric distribution model, and the P values were corrected using the Benjamini–Hochberg method. The reuslts are Q values.
Log(Q): Over- or under- representation strengths are represented by -log(Q) or log(Q)
"++++", represents significantly over-represented, P<1E-50
"+++", represents significantly over-represented, P<1E-10
"++", represents significantly over-represented, P<0.05
"+", represents over-represented but not significantly, P>0.05
"––––", represents significantly under–represented, P<1E–50
"–––", represents significantly under–represented, P<1E–10
"––", represents significantly under–represented, P<0.05
"–", represents under–represented but not significantly, P>0.05
Heart
M	N	m	n	dir_BH_adj	Log(Q)	Development Stage	Protein category
1986	596	115	39	+	0.57291	11week_post_conception	DomCDRP
1986	213	115	13	+	0.3325	12_week_post_conception	DomCDRP
1986	401	115	23	–	–0.2716	13_week_post_conception	DomCDRP
1986	458	115	27	+	0.30574	16_week_post_conception	DomCDRP
1986	56	115	1	–	–0.2121	18_week_post_conception	DomCDRP
1986	421	115	22	–	–0.47438	19_week_post_conception	DomCDRP
1986	363	115	20	–	–0.21439	4_week_post_conception	DomCDRP
1986	816	115	35	––	–1.39555	5_week_post_conception	DomCDRP
1986	533	115	27	–	–0.50375	6_week_post_conception	DomCDRP
1986	562	115	26	–	–0.88863	7_week_post_conception	DomCDRP
1986	1139	115	79	++	1.56472	8_week_post_conception	DomCDRP
1986	941	115	62	+	0.9269	9_week_post_conception	DomCDRP
1986	82	115	4	–	–0.19485	adolescent	DomCDRP
1986	319	115	12	–	–0.96805	infant	DomCDRP
1986	272	115	19	+	0.66267	middle_adult	DomCDRP
1986	322	115	17	–	–0.40682	neonate	DomCDRP
1986	141	115	5	–	–0.6743	toddler	DomCDRP
1986	108	115	10	+	1.04494	young_adult	DomCDRP
Ovary
M	N	m	n	dir_BH_adj	Log(Q)	Development Stage	Protein category
1654	707	100	40	–	–0.19221	10_week_post_conception	DomCDRP
1654	144	100	9	+	0.29059	11week_post_conception	DomCDRP
1654	539	100	40	+	0.8817	12_week_post_conception	DomCDRP
1654	134	100	12	+	0.98583	13_week_post_conception	DomCDRP
1654	816	100	51	+	0.39263	16_week_post_conception	DomCDRP
1654	404	100	39	++	2.91865	18_week_post_conception	DomCDRP
1654	357	100	16	–	–0.70585	4_week_post_conception	DomCDRP
1654	187	100	6	–	–0.69147	5_week_post_conception	DomCDRP
1654	193	100	8	–	–0.5129	6_week_post_conception	DomCDRP
1654	367	100	21	–	–0.23162	7_week_post_conception	DomCDRP
1654	684	100	35	–	–0.96093	8_week_post_conception	DomCDRP
1654	147	100	11	+	0	9_week_post_conception	DomCDRP
Testis
M	N	m	n	dir_BH_adj	Log(Q)	Development Stage	Protein category
2827	255	172	23	+	0.88751	10_week_post_conception	DomCDRP
2827	217	172	11	–	–0.49836	11week_post_conception	DomCDRP
2827	194	172	22	++	2.4446	12_week_post_conception	DomCDRP
2827	657	172	53	++	1.81991	13_week_post_conception	DomCDRP
2827	561	172	34	–	–0.27099	16_week_post_conception	DomCDRP
2827	137	172	5	–	–0.70606	18_week_post_conception	DomCDRP
2827	224	172	11	–	–0.43544	19_week_post_conception	DomCDRP
2827	134	172	5	–	–0.18663	4_week_post_conception	DomCDRP
2827	328	172	17	–	–0.42922	5_week_post_conception	DomCDRP
2827	281	172	13	–	–0.16059	6_week_post_conception	DomCDRP
2827	549	172	32	–	–0.36085	7_week_post_conception	DomCDRP
2827	596	172	48	+	1.16317	8_week_post_conception	DomCDRP
2827	210	172	17	+	0.75033	9_week_post_conception	DomCDRP
2827	2249	172	132	–	–0.40325	adolescent	DomCDRP
2827	1137	172	77	+	0.91975	elderly	DomCDRP
2827	952	172	48	–	–0.64321	infant	DomCDRP
2827	1347	172	93	++	1.31527	middle_adult	DomCDRP
2827	268	172	10	–	–0.67382	toddler	DomCDRP
2827	2229	172	137	+	0.35781	young_adult	DomCDRP

## Sheet: Table S5A
Table S5A The abundance level data and categories data of proteins (The data used in figure5A)
Protein_ID_OTC	Category-adj	abundance_level
ENSP00000000412-adrenalgland	NoCDRP	M
ENSP00000000412-adult_heart	NoCDRP	L
ENSP00000000412-adult_liver	NoCDRP	M
ENSP00000000412-adult_ovary	NoCDRP	M
ENSP00000000412-adult_testis	NoCDRP	H
ENSP00000000412-anus	NoCDRP	M
ENSP00000000412-Bcells	NoCDRP	H
ENSP00000000412-bone	NoCDRP	M
ENSP00000000412-brain	NoCDRP	M
ENSP00000000412-cardia	NoCDRP	M
ENSP00000000412-CD4Tcells	NoCDRP	M
ENSP00000000412-CD8Tcells	NoCDRP	M
ENSP00000000412-cerebral_cortex	NoCDRP	M
ENSP00000000412-cervix_uteri	NoCDRP	M
ENSP00000000412-colon	NoCDRP	M
ENSP00000000412-fetal_heart	NoCDRP	M
ENSP00000000412-fetal_liver	NoCDRP	M
ENSP00000000412-fetal_ovary	NoCDRP	M
ENSP00000000412-fetal_testis	NoCDRP	M
ENSP00000000412-gallbladder	NoCDRP	M
ENSP00000000412-gut	NoCDRP	M
ENSP00000000412-kidney	NoCDRP	M
ENSP00000000412-langerhans_islet	NoCDRP	M
ENSP00000000412-lung	NoCDRP	M
ENSP00000000412-lymph_node	NoCDRP	M
ENSP00000000412-monocytes	NoCDRP	M
ENSP00000000412-nasopharynx	NoCDRP	M
ENSP00000000412-NKcells	NoCDRP	M
ENSP00000000412-oligodendrocyte	NoCDRP	M
ENSP00000000412-oral_cavity	NoCDRP	M
ENSP00000000412-pancreas	NoCDRP	M
ENSP00000000412-placenta	NoCDRP	M
ENSP00000000412-platelets	NoCDRP	M
ENSP00000000412-prostate	NoCDRP	M
ENSP00000000412-rectum	NoCDRP	M
ENSP00000000412-retina	NoCDRP	M
ENSP00000000412-salivary_gland	NoCDRP	M
ENSP00000000412-seminal_vesicle	NoCDRP	M
ENSP00000000412-spinalcord	NoCDRP	M
ENSP00000000412-spleen	NoCDRP	M
ENSP00000000412-stomach	NoCDRP	M
ENSP00000000412-thyroid_gland	NoCDRP	M
ENSP00000000412-tonsil	NoCDRP	M
ENSP00000000412-tube	NoCDRP	M
ENSP00000000412-urinarybladder	NoCDRP	M
ENSP00000000412-uterus_postmenopause	NoCDRP	M
ENSP00000000412-uterus_premenopause	NoCDRP	M
ENSP00000007722-adrenalgland	DomCDRP	M
ENSP00000007722-adult_ovary	DomCDRP	M
ENSP00000007722-adult_testis	DomCDRP	M
ENSP00000007722-anus	DomCDRP	M
ENSP00000007722-bone	DomCDRP	H
ENSP00000007722-breast	DomCDRP	M
ENSP00000007722-cardia	DomCDRP	M
ENSP00000007722-cerebral_cortex	DomCDRP	M
ENSP00000007722-cervix_uteri	DomCDRP	M
ENSP00000007722-colon	DomCDRP	M
ENSP00000007722-esophagus	DomCDRP	L
ENSP00000007722-fetal_heart	DomCDRP	L
ENSP00000007722-fetal_ovary	DomCDRP	L
ENSP00000007722-fetal_testis	DomCDRP	L
ENSP00000007722-gallbladder	DomCDRP	M
ENSP00000007722-gut	DomCDRP	L
ENSP00000007722-kidney	DomCDRP	M
ENSP00000007722-langerhans_islet	DomCDRP	M
ENSP00000007722-lung	DomCDRP	H
ENSP00000007722-lymph_node	DomCDRP	L
ENSP00000007722-oral_cavity	DomCDRP	M
ENSP00000007722-pancreas	DomCDRP	M
ENSP00000007722-placenta	DomCDRP	L
ENSP00000007722-prostate	DomCDRP	M
ENSP00000007722-rectum	DomCDRP	M
ENSP00000007722-retina	DomCDRP	L
ENSP00000007722-salivary_gland	DomCDRP	M
ENSP00000007722-seminal_vesicle	DomCDRP	M
ENSP00000007722-spinalcord	DomCDRP	L
ENSP00000007722-spleen	DomCDRP	L
ENSP00000007722-stomach	DomCDRP	M
ENSP00000007722-thyroid_gland	DomCDRP	M
ENSP00000007722-tonsil	DomCDRP	M
ENSP00000007722-tube	DomCDRP	M
ENSP00000007722-urinarybladder	DomCDRP	M
ENSP00000007722-uterus_postmenopause	DomCDRP	M
ENSP00000007722-uterus_premenopause	DomCDRP	M
ENSP00000215531-adrenalgland	DomCDRP	M
ENSP00000215531-gut	DomCDRP	H
ENSP00000215531-kidney	DomCDRP	H
ENSP00000215531-prostate	DomCDRP	M
ENSP00000218230-adrenalgland	DomCDRP	M
ENSP00000218230-adult_heart	DomCDRP	H
ENSP00000218230-anus	DomCDRP	L
ENSP00000218230-brain	DomCDRP	H
ENSP00000218230-cerebral_cortex	DomCDRP	L
ENSP00000218230-cervix_uteri	DomCDRP	M
ENSP00000218230-colon	DomCDRP	M
ENSP00000218230-fetal_heart	DomCDRP	M
ENSP00000218230-fetal_testis	DomCDRP	M
ENSP00000218230-gallbladder	DomCDRP	L
ENSP00000218230-gut	DomCDRP	H
ENSP00000218230-langerhans_islet	DomCDRP	H
ENSP00000218230-lung	DomCDRP	M
ENSP00000218230-monocytes	DomCDRP	M
ENSP00000218230-pancreas	DomCDRP	H
ENSP00000218230-prostate	DomCDRP	M
ENSP00000218230-rectum	DomCDRP	M
ENSP00000218230-retina	DomCDRP	M
ENSP00000218230-salivary_gland	DomCDRP	L
ENSP00000218230-seminal_vesicle	DomCDRP	M
ENSP00000218230-spinalcord	DomCDRP	H
ENSP00000218230-stomach	DomCDRP	M
ENSP00000218230-tonsil	DomCDRP	M
ENSP00000218230-uterus_premenopause	DomCDRP	M
ENSP00000219150-adrenalgland	DomCDRP	M
ENSP00000219150-adult_heart	DomCDRP	L
ENSP00000219150-adult_liver	DomCDRP	M
ENSP00000219150-adult_ovary	DomCDRP	M
ENSP00000219150-adult_testis	DomCDRP	M
ENSP00000219150-anus	DomCDRP	H
ENSP00000219150-Bcells	DomCDRP	H
ENSP00000219150-brain	DomCDRP	H
ENSP00000219150-cardia	DomCDRP	H
ENSP00000219150-CD4Tcells	DomCDRP	H
ENSP00000219150-CD8Tcells	DomCDRP	H
ENSP00000219150-cerebral_cortex	DomCDRP	M
ENSP00000219150-cervix_uteri	DomCDRP	H
ENSP00000219150-colon	DomCDRP	H
ENSP00000219150-esophagus	DomCDRP	M
ENSP00000219150-fetal_heart	DomCDRP	M
ENSP00000219150-fetal_liver	DomCDRP	M
ENSP00000219150-fetal_ovary	DomCDRP	M
ENSP00000219150-fetal_testis	DomCDRP	M
ENSP00000219150-gallbladder	DomCDRP	H
ENSP00000219150-gut	DomCDRP	H
ENSP00000219150-kidney	DomCDRP	M
ENSP00000219150-lung	DomCDRP	H
ENSP00000219150-lymph_node	DomCDRP	H
ENSP00000219150-monocytes	DomCDRP	H
ENSP00000219150-nasopharynx	DomCDRP	M
ENSP00000219150-NKcells	DomCDRP	H
ENSP00000219150-oligodendrocyte	DomCDRP	M
ENSP00000219150-oral_cavity	DomCDRP	H
ENSP00000219150-pancreas	DomCDRP	H
ENSP00000219150-placenta	DomCDRP	M
ENSP00000219150-platelets	DomCDRP	H
ENSP00000219150-prostate	DomCDRP	H
ENSP00000219150-rectum	DomCDRP	H
ENSP00000219150-retina	DomCDRP	M
ENSP00000219150-salivary_gland	DomCDRP	H
ENSP00000219150-seminal_vesicle	DomCDRP	M
ENSP00000219150-skin	DomCDRP	H
ENSP00000219150-spinalcord	DomCDRP	M
ENSP00000219150-spleen	DomCDRP	H
ENSP00000219150-stomach	DomCDRP	H
ENSP00000219150-thyroid_gland	DomCDRP	M
ENSP00000219150-tonsil	DomCDRP	H
ENSP00000219150-tube	DomCDRP	H
ENSP00000219150-urinarybladder	DomCDRP	M
ENSP00000219150-uterus_postmenopause	DomCDRP	H
ENSP00000219150-uterus_premenopause	DomCDRP	H
ENSP00000219150-vulva	DomCDRP	M
ENSP00000220597-adrenalgland	DomCDRP	M
ENSP00000220597-Bcells	DomCDRP	M
ENSP00000220597-brain	DomCDRP	M
ENSP00000220597-CD4Tcells	DomCDRP	M
ENSP00000220597-CD8Tcells	DomCDRP	M
ENSP00000220597-fetal_liver	DomCDRP	L
ENSP00000220597-fetal_ovary	DomCDRP	L
ENSP00000220597-fetal_testis	DomCDRP	L
ENSP00000220597-gut	DomCDRP	L
ENSP00000220597-monocytes	DomCDRP	M
ENSP00000220597-NKcells	DomCDRP	M
ENSP00000220597-placenta	DomCDRP	L
ENSP00000220597-platelets	DomCDRP	L
ENSP00000220597-prostate	DomCDRP	L
ENSP00000220597-retina	DomCDRP	M
ENSP00000225969-adrenalgland	NoCDRP	M
ENSP00000225969-adult_heart	NoCDRP	L
ENSP00000225969-adult_liver	NoCDRP	M
ENSP00000225969-adult_ovary	NoCDRP	M
ENSP00000225969-adult_testis	NoCDRP	L
ENSP00000225969-Bcells	NoCDRP	M
ENSP00000225969-bone	NoCDRP	L
ENSP00000225969-brain	NoCDRP	L
ENSP00000225969-breast	NoCDRP	H
ENSP00000225969-CD4Tcells	NoCDRP	L
ENSP00000225969-CD8Tcells	NoCDRP	M
ENSP00000225969-colon	NoCDRP	M
ENSP00000225969-fetal_heart	NoCDRP	M
ENSP00000225969-fetal_ovary	NoCDRP	M
ENSP00000225969-fetal_testis	NoCDRP	M
ENSP00000225969-gallbladder	NoCDRP	L
ENSP00000225969-gut	NoCDRP	L
ENSP00000225969-langerhans_islet	NoCDRP	M
ENSP00000225969-NKcells	NoCDRP	L
ENSP00000225969-oligodendrocyte	NoCDRP	M
ENSP00000225969-pancreas	NoCDRP	M
ENSP00000225969-rectum	NoCDRP	L
ENSP00000225969-retina	NoCDRP	L
ENSP00000226207-adrenalgland	DomCDRP	L
ENSP00000226207-adult_heart	DomCDRP	H
ENSP00000226207-adult_liver	DomCDRP	L
ENSP00000226207-anus	DomCDRP	H
ENSP00000226207-Bcells	DomCDRP	L
ENSP00000226207-bone	DomCDRP	M
ENSP00000226207-brain	DomCDRP	M
ENSP00000226207-breast	DomCDRP	H
ENSP00000226207-cardia	DomCDRP	H
ENSP00000226207-CD4Tcells	DomCDRP	H
ENSP00000226207-CD8Tcells	DomCDRP	L
ENSP00000226207-cerebral_cortex	DomCDRP	M
ENSP00000226207-cervix_uteri	DomCDRP	H
ENSP00000226207-colon	DomCDRP	L
ENSP00000226207-esophagus	DomCDRP	H
ENSP00000226207-fetal_heart	DomCDRP	M
ENSP00000226207-fetal_liver	DomCDRP	L
ENSP00000226207-fetal_ovary	DomCDRP	L
ENSP00000226207-gallbladder	DomCDRP	L
ENSP00000226207-gut	DomCDRP	H
ENSP00000226207-kidney	DomCDRP	L
ENSP00000226207-lung	DomCDRP	H
ENSP00000226207-lymph_node	DomCDRP	H
ENSP00000226207-monocytes	DomCDRP	H
ENSP00000226207-oligodendrocyte	DomCDRP	H
ENSP00000226207-placenta	DomCDRP	L
ENSP00000226207-platelets	DomCDRP	H
ENSP00000226207-prostate	DomCDRP	M
ENSP00000226207-rectum	DomCDRP	L
ENSP00000226207-salivary_gland	DomCDRP	H
ENSP00000226207-skin	DomCDRP	M
ENSP00000226207-spinalcord	DomCDRP	M
ENSP00000226207-spleen	DomCDRP	M
ENSP00000226207-stomach	DomCDRP	H
ENSP00000226207-thyroid_gland	DomCDRP	M
ENSP00000226207-tonsil	DomCDRP	M
ENSP00000226207-tube	DomCDRP	H
ENSP00000226207-urinarybladder	DomCDRP	L
ENSP00000226207-uterus_postmenopause	DomCDRP	H
ENSP00000226207-uterus_premenopause	DomCDRP	H
ENSP00000228945-adrenalgland	NonDomCDRP	H
ENSP00000228945-adult_heart	NonDomCDRP	M
ENSP00000228945-adult_liver	NonDomCDRP	M
ENSP00000228945-adult_ovary	NonDomCDRP	M
ENSP00000228945-adult_testis	NonDomCDRP	H
ENSP00000228945-anus	NonDomCDRP	H
ENSP00000228945-Bcells	NonDomCDRP	H
ENSP00000228945-brain	NonDomCDRP	M
ENSP00000228945-cardia	NonDomCDRP	H
ENSP00000228945-CD4Tcells	NonDomCDRP	H
ENSP00000228945-CD8Tcells	NonDomCDRP	H
ENSP00000228945-cerebral_cortex	NonDomCDRP	H
ENSP00000228945-cervix_uteri	NonDomCDRP	H
ENSP00000228945-colon	NonDomCDRP	H
ENSP00000228945-esophagus	NonDomCDRP	H
ENSP00000228945-fetal_heart	NonDomCDRP	H
ENSP00000228945-fetal_liver	NonDomCDRP	H
ENSP00000228945-fetal_ovary	NonDomCDRP	M
ENSP00000228945-fetal_testis	NonDomCDRP	H
ENSP00000228945-gallbladder	NonDomCDRP	H
ENSP00000228945-gut	NonDomCDRP	H
ENSP00000228945-kidney	NonDomCDRP	H
ENSP00000228945-langerhans_islet	NonDomCDRP	M
ENSP00000228945-lung	NonDomCDRP	H
ENSP00000228945-lymph_node	NonDomCDRP	H
ENSP00000228945-monocytes	NonDomCDRP	H
ENSP00000228945-nasopharynx	NonDomCDRP	H
ENSP00000228945-NKcells	NonDomCDRP	H
ENSP00000228945-oral_cavity	NonDomCDRP	H
ENSP00000228945-pancreas	NonDomCDRP	H
ENSP00000228945-placenta	NonDomCDRP	H
ENSP00000228945-platelets	NonDomCDRP	H
ENSP00000228945-prostate	NonDomCDRP	H
ENSP00000228945-rectum	NonDomCDRP	H
ENSP00000228945-retina	NonDomCDRP	M
ENSP00000228945-salivary_gland	NonDomCDRP	H
ENSP00000228945-seminal_vesicle	NonDomCDRP	M
ENSP00000228945-skin	NonDomCDRP	H
ENSP00000228945-spinalcord	NonDomCDRP	H
ENSP00000228945-spleen	NonDomCDRP	H
ENSP00000228945-stomach	NonDomCDRP	H
ENSP00000228945-thyroid_gland	NonDomCDRP	H
ENSP00000228945-tonsil	NonDomCDRP	H
ENSP00000228945-tube	NonDomCDRP	H
ENSP00000228945-urinarybladder	NonDomCDRP	H
ENSP00000228945-uterus_postmenopause	NonDomCDRP	H
ENSP00000228945-uterus_premenopause	NonDomCDRP	H
ENSP00000228945-vulva	NonDomCDRP	H
ENSP00000232496-adrenalgland	NoCDRP	M
ENSP00000232496-adult_ovary	NoCDRP	L
ENSP00000232496-brain	NoCDRP	M
ENSP00000232496-fetal_testis	NoCDRP	L
ENSP00000232496-oligodendrocyte	NoCDRP	M
ENSP00000232496-retina	NoCDRP	L
ENSP00000232496-spinalcord	NoCDRP	L
ENSP00000238788-adrenalgland	DomCDRP	M
ENSP00000238788-adult_liver	DomCDRP	M
ENSP00000238788-adult_ovary	DomCDRP	M
ENSP00000238788-adult_testis	DomCDRP	M
ENSP00000238788-anus	DomCDRP	M
ENSP00000238788-Bcells	DomCDRP	M
ENSP00000238788-bone	DomCDRP	H
ENSP00000238788-brain	DomCDRP	M
ENSP00000238788-breast	DomCDRP	M
ENSP00000238788-CD4Tcells	DomCDRP	L
ENSP00000238788-CD8Tcells	DomCDRP	M
ENSP00000238788-colon	DomCDRP	L
ENSP00000238788-fetal_heart	DomCDRP	L
ENSP00000238788-fetal_liver	DomCDRP	M
ENSP00000238788-fetal_ovary	DomCDRP	M
ENSP00000238788-fetal_testis	DomCDRP	M
ENSP00000238788-gut	DomCDRP	L
ENSP00000238788-langerhans_islet	DomCDRP	M
ENSP00000238788-lymph_node	DomCDRP	M
ENSP00000238788-monocytes	DomCDRP	L
ENSP00000238788-NKcells	DomCDRP	M
ENSP00000238788-pancreas	DomCDRP	M
ENSP00000238788-placenta	DomCDRP	M
ENSP00000238788-prostate	DomCDRP	L
ENSP00000238788-retina	DomCDRP	M
ENSP00000238788-salivary_gland	DomCDRP	M
ENSP00000238788-seminal_vesicle	DomCDRP	L
ENSP00000238788-skin	DomCDRP	M
ENSP00000238788-stomach	DomCDRP	H
ENSP00000252590-adrenalgland	DomCDRP	M
ENSP00000252590-anus	DomCDRP	M
ENSP00000252590-cervix_uteri	DomCDRP	L
ENSP00000252590-colon	DomCDRP	M
ENSP00000252590-esophagus	DomCDRP	M
ENSP00000252590-fetal_heart	DomCDRP	M
ENSP00000252590-fetal_liver	DomCDRP	M
ENSP00000252590-gallbladder	DomCDRP	M
ENSP00000252590-gut	DomCDRP	M
ENSP00000252590-kidney	DomCDRP	M
ENSP00000252590-langerhans_islet	DomCDRP	L
ENSP00000252590-lung	DomCDRP	M
ENSP00000252590-lymph_node	DomCDRP	L
ENSP00000252590-pancreas	DomCDRP	M
ENSP00000252590-prostate	DomCDRP	M
ENSP00000252590-rectum	DomCDRP	M
ENSP00000252590-salivary_gland	DomCDRP	L
ENSP00000252590-seminal_vesicle	DomCDRP	M
ENSP00000252590-stomach	DomCDRP	M
ENSP00000252590-thyroid_gland	DomCDRP	M
ENSP00000252590-tonsil	DomCDRP	M
ENSP00000252590-tube	DomCDRP	L
ENSP00000252590-urinarybladder	DomCDRP	L
ENSP00000252590-uterus_postmenopause	DomCDRP	M
ENSP00000252590-uterus_premenopause	DomCDRP	M
ENSP00000253110-adrenalgland	NoCDRP	M
ENSP00000253110-adult_liver	NoCDRP	M
ENSP00000253110-adult_ovary	NoCDRP	M
ENSP00000253110-adult_testis	NoCDRP	M
ENSP00000253110-anus	NoCDRP	M
ENSP00000253110-Bcells	NoCDRP	M
ENSP00000253110-cardia	NoCDRP	M
ENSP00000253110-CD4Tcells	NoCDRP	M
ENSP00000253110-CD8Tcells	NoCDRP	M
ENSP00000253110-cerebral_cortex	NoCDRP	M
ENSP00000253110-cervix_uteri	NoCDRP	L
ENSP00000253110-colon	NoCDRP	L
ENSP00000253110-fetal_heart	NoCDRP	L
ENSP00000253110-fetal_liver	NoCDRP	L
ENSP00000253110-fetal_ovary	NoCDRP	M
ENSP00000253110-gut	NoCDRP	L
ENSP00000253110-lymph_node	NoCDRP	M
ENSP00000253110-monocytes	NoCDRP	M
ENSP00000253110-NKcells	NoCDRP	M
ENSP00000253110-oral_cavity	NoCDRP	L
ENSP00000253110-pancreas	NoCDRP	M
ENSP00000253110-rectum	NoCDRP	L
ENSP00000253110-retina	NoCDRP	M
ENSP00000253110-seminal_vesicle	NoCDRP	M
ENSP00000253110-spinalcord	NoCDRP	L
ENSP00000253110-spleen	NoCDRP	M
ENSP00000253110-stomach	NoCDRP	M
ENSP00000253110-thyroid_gland	NoCDRP	L
ENSP00000253110-tube	NoCDRP	M
ENSP00000253110-urinarybladder	NoCDRP	L
ENSP00000253110-uterus_postmenopause	NoCDRP	M
ENSP00000253110-uterus_premenopause	NoCDRP	L
ENSP00000255381-adrenalgland	DomCDRP	L
ENSP00000255381-adult_heart	DomCDRP	M
ENSP00000255381-adult_liver	DomCDRP	L
ENSP00000255381-Bcells	DomCDRP	L
ENSP00000255381-bone	DomCDRP	M
ENSP00000255381-brain	DomCDRP	M
ENSP00000255381-breast	DomCDRP	H
ENSP00000255381-CD4Tcells	DomCDRP	H
ENSP00000255381-CD8Tcells	DomCDRP	L
ENSP00000255381-cerebral_cortex	DomCDRP	M
ENSP00000255381-colon	DomCDRP	L
ENSP00000255381-esophagus	DomCDRP	M
ENSP00000255381-fetal_heart	DomCDRP	L
ENSP00000255381-fetal_ovary	DomCDRP	L
ENSP00000255381-fetal_testis	DomCDRP	L
ENSP00000255381-gallbladder	DomCDRP	L
ENSP00000255381-gut	DomCDRP	H
ENSP00000255381-lung	DomCDRP	H
ENSP00000255381-monocytes	DomCDRP	H
ENSP00000255381-oligodendrocyte	DomCDRP	H
ENSP00000255381-placenta	DomCDRP	M
ENSP00000255381-platelets	DomCDRP	H
ENSP00000255381-prostate	DomCDRP	L
ENSP00000255381-rectum	DomCDRP	L
ENSP00000255381-spinalcord	DomCDRP	M
ENSP00000255381-thyroid_gland	DomCDRP	M
ENSP00000255381-tonsil	DomCDRP	M
ENSP00000255381-tube	DomCDRP	H
ENSP00000255381-urinarybladder	DomCDRP	L
ENSP00000257696-adrenalgland	NoCDRP	L
ENSP00000257696-adult_testis	NoCDRP	M
ENSP00000258424-adrenalgland	NoCDRP	H
ENSP00000258424-adult_heart	NoCDRP	H
ENSP00000258424-adult_liver	NoCDRP	M
ENSP00000258424-adult_ovary	NoCDRP	M
ENSP00000258424-adult_testis	NoCDRP	H
ENSP00000258424-anus	NoCDRP	M
ENSP00000258424-Bcells	NoCDRP	H
ENSP00000258424-bone	NoCDRP	H
ENSP00000258424-brain	NoCDRP	H
ENSP00000258424-breast	NoCDRP	M
ENSP00000258424-cardia	NoCDRP	M
ENSP00000258424-CD4Tcells	NoCDRP	H
ENSP00000258424-CD8Tcells	NoCDRP	H
ENSP00000258424-cervix_uteri	NoCDRP	M
ENSP00000258424-colon	NoCDRP	H
ENSP00000258424-esophagus	NoCDRP	H
ENSP00000258424-fetal_heart	NoCDRP	H
ENSP00000258424-fetal_liver	NoCDRP	H
ENSP00000258424-fetal_ovary	NoCDRP	H
ENSP00000258424-fetal_testis	NoCDRP	H
ENSP00000258424-gallbladder	NoCDRP	H
ENSP00000258424-gut	NoCDRP	H
ENSP00000258424-kidney	NoCDRP	H
ENSP00000258424-langerhans_islet	NoCDRP	H
ENSP00000258424-lung	NoCDRP	H
ENSP00000258424-monocytes	NoCDRP	H
ENSP00000258424-nasopharynx	NoCDRP	H
ENSP00000258424-NKcells	NoCDRP	H
ENSP00000258424-oligodendrocyte	NoCDRP	H
ENSP00000258424-oral_cavity	NoCDRP	M
ENSP00000258424-pancreas	NoCDRP	H
ENSP00000258424-placenta	NoCDRP	H
ENSP00000258424-platelets	NoCDRP	H
ENSP00000258424-prostate	NoCDRP	H
ENSP00000258424-rectum	NoCDRP	H
ENSP00000258424-retina	NoCDRP	H
ENSP00000258424-salivary_gland	NoCDRP	M
ENSP00000258424-seminal_vesicle	NoCDRP	H
ENSP00000258424-skin	NoCDRP	H
ENSP00000258424-spinalcord	NoCDRP	H
ENSP00000258424-spleen	NoCDRP	M
ENSP00000258424-thyroid_gland	NoCDRP	M
ENSP00000258424-tonsil	NoCDRP	H
ENSP00000258424-urinarybladder	NoCDRP	M
ENSP00000258424-uterus_postmenopause	NoCDRP	H
ENSP00000258424-uterus_premenopause	NoCDRP	H
ENSP00000259477-adrenalgland	NoCDRP	M
ENSP00000259477-adult_heart	NoCDRP	M
ENSP00000259477-adult_liver	NoCDRP	M
ENSP00000259477-adult_ovary	NoCDRP	M
ENSP00000259477-adult_testis	NoCDRP	M
ENSP00000259477-anus	NoCDRP	M
ENSP00000259477-Bcells	NoCDRP	H
ENSP00000259477-brain	NoCDRP	M
ENSP00000259477-breast	NoCDRP	M
ENSP00000259477-cardia	NoCDRP	H
ENSP00000259477-CD4Tcells	NoCDRP	H
ENSP00000259477-CD8Tcells	NoCDRP	H
ENSP00000259477-cerebral_cortex	NoCDRP	M
ENSP00000259477-cervix_uteri	NoCDRP	M
ENSP00000259477-colon	NoCDRP	M
ENSP00000259477-esophagus	NoCDRP	M
ENSP00000259477-fetal_heart	NoCDRP	M
ENSP00000259477-fetal_liver	NoCDRP	M
ENSP00000259477-fetal_ovary	NoCDRP	H
ENSP00000259477-fetal_testis	NoCDRP	M
ENSP00000259477-gut	NoCDRP	M
ENSP00000259477-kidney	NoCDRP	M
ENSP00000259477-langerhans_islet	NoCDRP	M
ENSP00000259477-lung	NoCDRP	M
ENSP00000259477-lymph_node	NoCDRP	H
ENSP00000259477-monocytes	NoCDRP	M
ENSP00000259477-nasopharynx	NoCDRP	H
ENSP00000259477-NKcells	NoCDRP	H
ENSP00000259477-oligodendrocyte	NoCDRP	M
ENSP00000259477-oral_cavity	NoCDRP	M
ENSP00000259477-pancreas	NoCDRP	M
ENSP00000259477-placenta	NoCDRP	M
ENSP00000259477-platelets	NoCDRP	M
ENSP00000259477-prostate	NoCDRP	M
ENSP00000259477-rectum	NoCDRP	M
ENSP00000259477-retina	NoCDRP	M
ENSP00000259477-salivary_gland	NoCDRP	H
ENSP00000259477-seminal_vesicle	NoCDRP	M
ENSP00000259477-skin	NoCDRP	H
ENSP00000259477-spinalcord	NoCDRP	M
ENSP00000259477-spleen	NoCDRP	H
ENSP00000259477-stomach	NoCDRP	H
ENSP00000259477-thyroid_gland	NoCDRP	M
ENSP00000259477-tonsil	NoCDRP	M
ENSP00000259477-tube	NoCDRP	M
ENSP00000259477-urinarybladder	NoCDRP	M
ENSP00000259477-uterus_postmenopause	NoCDRP	M
ENSP00000259477-uterus_premenopause	NoCDRP	M
ENSP00000259477-vulva	NoCDRP	M
ENSP00000261023-adrenalgland	NoCDRP	M
ENSP00000261023-adult_heart	NoCDRP	L
ENSP00000261023-adult_liver	NoCDRP	M
ENSP00000261023-adult_ovary	NoCDRP	M
ENSP00000261023-adult_testis	NoCDRP	M
ENSP00000261023-anus	NoCDRP	M
ENSP00000261023-bone	NoCDRP	M
ENSP00000261023-brain	NoCDRP	M
ENSP00000261023-cardia	NoCDRP	M
ENSP00000261023-cerebral_cortex	NoCDRP	M
ENSP00000261023-cervix_uteri	NoCDRP	M
ENSP00000261023-colon	NoCDRP	M
ENSP00000261023-esophagus	NoCDRP	L
ENSP00000261023-fetal_heart	NoCDRP	M
ENSP00000261023-fetal_liver	NoCDRP	M
ENSP00000261023-fetal_ovary	NoCDRP	M
ENSP00000261023-fetal_testis	NoCDRP	M
ENSP00000261023-gallbladder	NoCDRP	M
ENSP00000261023-gut	NoCDRP	M
ENSP00000261023-kidney	NoCDRP	M
ENSP00000261023-langerhans_islet	NoCDRP	M
ENSP00000261023-lung	NoCDRP	M
ENSP00000261023-lymph_node	NoCDRP	M
ENSP00000261023-nasopharynx	NoCDRP	M
ENSP00000261023-oral_cavity	NoCDRP	M
ENSP00000261023-pancreas	NoCDRP	M
ENSP00000261023-placenta	NoCDRP	M
ENSP00000261023-platelets	NoCDRP	L
ENSP00000261023-prostate	NoCDRP	M
ENSP00000261023-rectum	NoCDRP	M
ENSP00000261023-retina	NoCDRP	M
ENSP00000261023-salivary_gland	NoCDRP	M
ENSP00000261023-seminal_vesicle	NoCDRP	M
ENSP00000261023-skin	NoCDRP	L
ENSP00000261023-spinalcord	NoCDRP	M
ENSP00000261023-spleen	NoCDRP	M
ENSP00000261023-stomach	NoCDRP	M
ENSP00000261023-thyroid_gland	NoCDRP	M
ENSP00000261023-tonsil	NoCDRP	M
ENSP00000261023-tube	NoCDRP	M
ENSP00000261023-urinarybladder	NoCDRP	M
ENSP00000261023-uterus_postmenopause	NoCDRP	M
ENSP00000261023-uterus_premenopause	NoCDRP	M
ENSP00000261023-vulva	NoCDRP	L
ENSP00000261191-adrenalgland	DomCDRP	L
ENSP00000261191-adult_liver	DomCDRP	L
ENSP00000261191-adult_ovary	DomCDRP	M
ENSP00000261191-adult_testis	DomCDRP	M
ENSP00000261191-anus	DomCDRP	L
ENSP00000261191-Bcells	DomCDRP	M
ENSP00000261191-CD4Tcells	DomCDRP	M
ENSP00000261191-CD8Tcells	DomCDRP	M
ENSP00000261191-colon	DomCDRP	L
ENSP00000261191-fetal_heart	DomCDRP	L
ENSP00000261191-fetal_ovary	DomCDRP	L
ENSP00000261191-fetal_testis	DomCDRP	M
ENSP00000261191-gallbladder	DomCDRP	L
ENSP00000261191-langerhans_islet	DomCDRP	L
ENSP00000261191-lymph_node	DomCDRP	M
ENSP00000261191-monocytes	DomCDRP	M
ENSP00000261191-NKcells	DomCDRP	L
ENSP00000261191-pancreas	DomCDRP	L
ENSP00000261191-prostate	DomCDRP	L
ENSP00000261191-retina	DomCDRP	M
ENSP00000261191-salivary_gland	DomCDRP	L
ENSP00000261191-stomach	DomCDRP	L
ENSP00000261601-adrenalgland	NoCDRP	H
ENSP00000261601-adult_heart	NoCDRP	M
ENSP00000261601-adult_liver	NoCDRP	M
ENSP00000261601-adult_ovary	NoCDRP	H
ENSP00000261601-adult_testis	NoCDRP	H
ENSP00000261601-anus	NoCDRP	H
ENSP00000261601-Bcells	NoCDRP	H
ENSP00000261601-brain	NoCDRP	H
ENSP00000261601-cardia	NoCDRP	M
ENSP00000261601-CD4Tcells	NoCDRP	H
ENSP00000261601-CD8Tcells	NoCDRP	H
ENSP00000261601-cerebral_cortex	NoCDRP	M
ENSP00000261601-cervix_uteri	NoCDRP	M
ENSP00000261601-colon	NoCDRP	H
ENSP00000261601-esophagus	NoCDRP	M
ENSP00000261601-fetal_heart	NoCDRP	M
ENSP00000261601-fetal_liver	NoCDRP	M
ENSP00000261601-fetal_ovary	NoCDRP	H
ENSP00000261601-fetal_testis	NoCDRP	H
ENSP00000261601-gallbladder	NoCDRP	M
ENSP00000261601-gut	NoCDRP	M
ENSP00000261601-kidney	NoCDRP	M
ENSP00000261601-langerhans_islet	NoCDRP	H
ENSP00000261601-lung	NoCDRP	M
[truncated: 217,129+ more rows]

## Sheet: Table S5B
Table S5B The half-life time and categories data of proteins (The data used in figure5B)
[truncated: 3,797 more rows]

[truncated: 3 more sheets: Table S6A, Table S6B, Table S6C]
